# Supplementary material for: Epidemiology and classification for canine and feline mammary gland tumors: a histopathological survey of 437 mammary gland tumor biopsies performed in a secondary care hospital in Chiang Mai, Thailand from 2012 to 2019
Source: PeerJ. 2024 Mar 15;12:e17077. doi: 10.7717/peerj.17077 (PMC10946389; doi:10.7717/peerj.17077)
Supplement: Supplemental Information 1 [file peerj-12-17077-s001.xlsx]

## Sheet: Privot R
Type of biopsy	Tumor
Animal	Feline
ป้ายชื่อแถว	นับจำนวน ของ No.
Benign	6
Malignant	30
ผลรวมทั้งหมด	36

## Sheet: all Raw data
No.	Year	HN	Case No	Animal	Pateint name	Owner name	Sex	Breed	Age	Location	Diagnosis	Type of biopsy	Type of tumor
1	2012	P5517934	D12-375	canine	จินนี่	คุณเยาวนา	Female	Shitzu	9	Mass at mammary gland	Simple carcinoma (Solid type)	Tumor	Malignant
2	2012	P5517872	D12-392	canine	นิล	คุณศรัณยู รองมาลี	Female	Mixed	4	Mass at mammary gland	Simple carcinoma (Anaplastic type)	Tumor	Malignant
3	2012	P5517901	D12-376	canine	อุ้ยอ้าย	คุณสวรรค์ บุณพน	Female	Poodle	11	Mass at mammary gland	Simple carcinoma (Solid type)	Tumor	Malignant
4	2012	P5517625	D12-339	canine	Snow white	คุณวิชญ์ เชยะกุล	Female	Poodle	9	Mass at mammary gland	Tubulopapillary carcinoma	Tumor	Malignant
5	2012	P5410965	D12-309	canine	ซินดี้	คุณอัจฉราพรรณ กาจสกุล	Female	Dalmecian	13	Mass at mammary gland	Tubulopapillary carcinoma	Tumor	Malignant
6	2012	P5517515	D12-268	canine	ตัวเล็ก	คุณณิชชรีย์ จำปา	Female	Poodle	8	Mass at mammary gland	Simple carcinoma (Anaplastic type)	Tumor	Malignant
7	2012	P5517627	D12-281	canine	เจนนี่	คุณอิศรพงศ์ สิทธิยศ	Female	Poodle	10	Mass at mammary gland	Solid carcinoma	Tumor	Malignant
8	2012	P5517230	D12-233	canine	มอมเเมม	คุณยุพา ชุ่มจิตต์	Female	Mixed	10	Mass at mammary gland	Complex tubular adenocarcinoma	Tumor	Malignant
9	2012	P5517123	D12-234	canine	ดุ๊กดิ๊ก	คุณเจตน์ สิงหลักษณ์	Female	Shitzu	10	Mass at mammary gland	Malignant mixed tumor	Tumor	Malignant
10	2012	P5517136	D12-199	canine	ถุงทอง	คุณพนิดา มูลกำเนิด	Female	Mixed	9	Mass at mammary gland	Complex carcinoma	Tumor	Malignant
11	2012	P5516612	D12-065	canine	เชอร์รี่	คุณรินทร์ลภัส	Female	Poodle	11	Mass at mammary gland	Complex carcinoma	Tumor	Malignant
12	2012	P5517038	D12-181	canine	ข้าวโพด	คุณเอกชัย คำอุดหนุน	Female	Mixed	8	Mass at mammary gland	Malignant mixed tumor	Tumor	Malignant
13	2012	P5516553	D12-066	canine	ไอติม	คุณสุภาณี นันต๊ะ	Female	Mixed	12	Mass at mammary gland	Tubulopapillary carcinoma	Tumor	Malignant
14	2012	P5516970	D12-156	canine	เบิร์ดเดย์	คุณนวพร นาคจู	Female	Mixed	8	Mass at mammary gland	Malignant mixed tumor	Tumor	Malignant
15	2012	P5516978	D12-157	canine	เลี่ยม	คุณสิริพร ณ เชียงใหม่	Female	Mixed	10	Mass at mammary gland	Tubulopapillary carcinoma	Tumor	Malignant
16	2012	P5516931	D12-153	canine	ซาร่า	คุณบุญรัตน์ รัตนเจริญมิตร	Female	Mixed	6	Mass at mammary gland	Solid carcinoma	Tumor	Malignant
17	2012	P5516547	D12-046	canine	เคา	คุณรุ่งอรุณ เเซ่ก๊วย	Female	Mixed	15	Mass at mammary gland	Solid carcinoma	Tumor	Malignant
18	2012	P5413065	D12-025	canine	มีมี่	คุณบุญนำ เอิ้นทะไชย	Female	Mixed	14	Mass at mammary gland	Solid carcinoma	Tumor	Malignant
19	2012	P5413186	D12-047	canine	เฉาก๊วย	คุณศรัญญา อย่างสุโขทัย	Female	Mixed	5	Mass at mammary gland	Complex solid carcinoma	Tumor	Malignant
20	2012	P5416295	D12-016	canine	มอมเเมม	คุณอุษณีย์ เงินกระโทก	Female	Mixed	17	Mass at mammary gland	Solid carcinoma	Tumor	Malignant
21	2012	P5519574	D12-776	canine	พองโก้	คุณเฉลียว จิตต์นาน	Female	Poodle	15	Mass at mammary gland	Simple carcinoma (Anaplastic type)	Tumor	Malignant
22	2012	P5519667	D12-812	canine	เเอนนา	คุณนันทพิสิฐ์ ฤทัยนันทะกาญจน์	Female	Cocker Spaniel	8	Mass at mammary gland	Simple carcinoma (Solid type)	Tumor	Malignant
23	2012	P5519346	D12-747	canine	เเบงค์	คุณภูษณิศา ดอกพงษ์กลาง	Male	Mixed	7	Mass at mammary gland	Simple carcinoma (Anaplastic type)	Tumor	Malignant
24	2012	P5519306	D12-710	canine	ซูกัส	คุณสาคร	Female	Poodle	8	Mass at mammary gland	Malignant mixed tumor	Tumor	Malignant
25	2012	P5519326	D12-694	canine	พุดดิ้ง	คุณสุรางค์รััตน์ ณ ลำปาง	Female	Mixed	12	Mass at mammary gland	Tubulopapillary carcinoma	Tumor	Malignant
26	2012	P5519189	D12-680	canine	โรบิน	คุณเจตศรันย์ สุวรรณธานี	Female	Miniature Pinscher	8	Mass at mammary gland	Solid carcinoma	Tumor	Malignant
27	2012	P5518864	D12-610	canine	นิกกี้	คุณยงยุทธ ผลาผล	Male	Mixed	5	Mass at mammary gland	Benign mixed tumor	Tumor	Benign
28	2012	P5519144	D12-652	canine	ข้าวจ้าว	คุณจุฑามาศ ชอบเเสงจันทร์	Female	Cocker Spaniel	8	Mass at mammary gland	Solid carcinoma	Tumor	Malignant
29	2012	P5518267	D12-506	canine	เเบมเเบม	คุณธวัช เททิพย์	Female	Poodle	7	Mass at mammary gland	Mucinous carcinoma	Tumor	Malignant
30	2012	P5306803	D12-484	canine	ยุ่ง	คุณคเชนทร์ พงศ์ทวีกาญจน์	Female	Mixed	7	Mass at mammary gland	Complex carcinoma	Tumor	Malignant
31	2012	P5518228	D12-446	canine	กีวี่	คุณยุคล นิมมานเหมินทร์	Female	Poodle	10	Mass at mammary gland	Complex carcinoma	Tumor	Malignant
32	2012	P5518232	D12-445	canine	ขี้มูก	คุณพะยอม มะโนจิต	Female	Rottweiler	7	Mass at mammary gland	Simple carcinoma (Anaplastic type)	Tumor	Malignant
33	2012	P5518124	D12-420	canine	แบล็ก	คุณวิชัย โอรัตนสถาพร	Female	Miniature Pinscher	10	Mass at mammary gland	Malignant mixed tumor	Tumor	Malignant
34	2012	P5522778	D12-1644	canine	ไข่เจียว	คุณวรัชยา ลำนวล	Female	Mixed	9	Mass at mammary gland	Tubulopapillary carcinoma	Tumor	Malignant
35	2012	P5521271	D12-1567	canine	โบโบ้	คุณพนิตนาฎ นันทขว้าง	Female	Mixed	8	Mass at mammary gland	Malignant mixed tumor	Tumor	Malignant
36	2012	P5522253	D12-1510	canine	ชีต้า	คุณกรรณิการ์ อินทรากอง	Female	Mixed	9	Mass at mammary gland	Tubulopapillary carcinoma	Tumor	Malignant
37	2012	P5521848	D12-1441	canine	ข้าวนึ่ง	คุณอุดม ไชยพรม	Female	Mixed	10	Mass at mammary gland	Adenosis with infiltrating carcinoma	Tumor	Malignant
38	2012	P5522233	D12-1506	canine	โคล่า	คุณสมพงษ์ ปัญญาสุข	Female	Mixed	10	Mass at mammary gland	Malignant mixed tumor	Tumor	Malignant
39	2012	P5521474	D12-1438	Feline	เเต้ม	คุณสุคนธ์ จันทวงศ์	Female	DSH	8	Mass at mammary gland	Solid carcinoma	Tumor	Malignant
40	2012	P5412640	D12-1199	Feline	สามสี	คุณอุทุมพร ธารากุล	Female	DSH	10	Mass at mammary gland	Simple carcinoma (Solid carcinoma)	Tumor	Malignant
41	2012	P5521271	D12-1290	canine	โบโบ้	คุณพนิตนาฎ นันทขว้าง	Female	Mixed	8	Mass at mammary gland	Tubulopapillary carcinoma	Tumor	Malignant
42	2011	P5516460	D12-026	canine	บี้	พระครูปลัดสิทธิวัฒน	Female	Mixed	10	Mass at mammary gland	Malignant mixed tumor	Tumor	Malignant
43	2012	P5521253	D12-1246	Feline	เหมียว	คุณบัวเพ็ชร ชัยชนะ	Female	DSH	12	Mass at mammary gland	Tubulopapillary carcinoma	Tumor	Malignant
44	2012	P5521278	D12-1247	canine	เด็ก	คุณศิริพร ใจกว้าง	Female	Mixed	12	Mass at mammary gland	Benign mixed mammary gland tumor	Tumor	Benign
45	2012	P5301473	D12-1226	canine	ดุ๊กดิ๊ก	คุณศรัญญา มงคลสิทธิ์	Female	Miniature Pinscher	10	Mass at mammary gland	Simple carcinoma (Solid carcinoma)	Tumor	Malignant
46	2012	P5521114	D12-1201	canine	ท๊อฟฟี่	คุณรัตติกาล กองกิจ	Female	Poodle	7	Mass at mammary gland	Malignant mixed tumor	Tumor	Malignant
47	2012	P5518164	D12-1117	canine	เหมียวๆ	คุณชลิดา หน่อชาย	Female	Mixed	8	Mass at mammary gland	Simple carcinoma (Anaplastic type)	Tumor	Malignant
48	2012	P5521023	D12-1154	canine	หมี	คุณชฎาพร เต็มดี	Female	Mixed	12	Mass at mammary gland	Simple carcinoma (Anaplastic type)	Tumor	Malignant
49	2012	P5307582	D12-1000	Feline	Maxi	คุณ Peter Apfelbdum	Female	DSH	16	Mass at mammary gland	Tubulopapillary carcinoma	Tumor	Malignant
50	2012	P5520956	D12-1130	canine	น้องพลอยสวย	คุณเบญจมาศ เป็งสุวรรณ	Female	Mixed	7	Mass at mammary gland	Mammary gland cystadenoma	Tumor	Benign
51	2012	P5520868	D12-1132	canine	สอง	คุณศุภชัย พิพิธสมบัติ	Female	Mixed	5	Mass at mammary gland	Carcinosarcoma	Tumor	Malignant
52	2012	P5520933	D12-1133	canine	ดิ๋ง	คุณสมฤดี ทองอุปการ	Female	Mixed	11	Mass at mammary gland	Simple carcinoma (Anaplastic type)	Tumor	Malignant
53	2012	P5518878	D12-1131	canine	แอนนี่	คุณศิลป์ชัย หัสจุมพล	Female	Golden Retriever	10	Mass at mammary gland	Malignant mixed mammary gland	Tumor	Malignant
54	2012	P5520505	D12-1007	canine	Pixxy	คุณเพิร์ล วัฒนากุล	Female	Bangkaew	10	Mass at mammary gland	Tubulopapillary carcinoma	Tumor	Malignant
55	2012	P5520453	D12-989	canine	พอลลี่	คุณรนนท์ ดวงเเก้วธนพร	Female	Golden Retriever	9	Mass at mammary gland	Fibrosarcoma	Tumor	Malignant
56	2012	P5518018	D12-905	canine	เตี้ย	คุณทองอิน จิตรมงคล	Female	Mixed	6	Mass at mammary gland	Tubulopapillary carcinoma	Tumor	Malignant
57	2012	P5520187	D12-947	canine	สตางค์	คุณบุปผา ทับทิมเเดง	Female	mixed	10	Mass at mammary gland	Tubulopapillary carcinoma	Tumor	Malignant
58	2012	P5521947	D12-1474	Feline	อุ๋ยอุ๋ย	คุณเบญจมาศ พงศ์อ้าย	Female	DSH	5	Mammary tissue	Fibroadenomatous change	Non-tumor
59	2013	p5628715	D13-1674	canine	ลีออง	คุณนิดา ศิริทรัพย์	Female	Beagle	5	Mass at mammary gland	Mammary gland adenoma	Tumor	Benign
60	2013	P5628531	D13-1622	canine	นางปุย	คุณ สนอง เเสงจันทร์	Female	Mixed	9	Mass at mammary gland	Simple carcinoma	Tumor	Malignant
61	2013	P5300536	D13-2665	canine	ฟาราห์	คุณ เรียม ชัยสวัสดิ์	Female	Poodle	16	Mass at mammary gland	Simple carcinoma (Solid carcinoma)	Tumor	Malignant
62	2013	P5302009	D13-1688	canine	นิต้า	คุณ ชัยรัตน์ ทัศนชน	Female	Poodle	10	Mass at mammary gland	Malignant mixed tumor	Tumor	Malignant
63	2013	P5627854	D13-1437	canine	มีมี่	คุณ สุชาติ นนท์ปัญญา	Female	mixed	9	Mass at mammary gland	Malignant mixed tumor	Tumor	Malignant
64	2013	P5628240	D13-1501	Feline	ไพลิน	คุณ พิมพ์ใจ ดวงสอาด	Female	DSH	9	Mass at mammary gland	Simple carcinoma (Solid type)	Tumor	Malignant
65	2013	P5625578	D13-1755	canine	ปุยฝ้าย	คุณ เเสงหล้า เฮือนงาม	Female	Poodle	10	Mass at mammary gland	Simple carcinoma (Tubulopapillary carcinoma)	Tumor	Malignant
66	2013	P5623477	D13-117	canine	เหมย	คุณ เครือวัลย์ โกมลสุบิน	Female	Mixed	10	Mass at mammary gland	Tubulopapillary carcinoma	Tumor	Malignant
67	2013	P5623459	D13-158	canine	บิวตี้	คุณอำนวย ชิดทอง	Female	mixed	9	Mass at mammary gland	Low-cellularity fibroadenoma	Tumor	Benign
68	2013	P5518659	D13-157	canine	มิมิ	คุณณิชญา จิโน	Female	Poodle	11	Mass at mammary gland	complex carcinoma	Tumor	Malignant
69	2013	P5520216	D13-185	canine	เยลลี่	คุณญานิน วงศ์ใหญ่	Female	Golden Retriever	10	Mass at mammary gland	malignant mixed mammary glant tumor	Tumor	Malignant
70	2013	P5623728	D13-193	Feline	ตัวเล็ก	คุณอโนทัย ชาญเวช	Female	DSH	11	Mass at mammary gland	Tubulopapillary carcinoma	Tumor	Malignant
71	2013	P5627591	D13-1359	canine	ชมพู่	คุณยุคุณธร ชุมกลัด	Female	Poodle	13	Mass at mammary gland	Tubulopapillary carcinoma	Tumor	Malignant
72	2013	P5628409	D13-1598	canine	ดุ๊กดิ๊ก	คุณจินต์ บุญยะ	Female	mixed	15	Mass at mammary gland	Simple carcinoma (Solid type)	Tumor	Malignant
73	2013	P5625399	D13-650	canine	ยู่ยี่	คุณฉัตฤดี ขันธิยะ	Female	mixed	12	Mass at mammary gland	Solid carcinoma	Tumor	Malignant
74	2013	P5519797	D13-536	canine	บะหมี่	คุณพัดชา ปินทะดิษ	Female	mixed	10	Mass at mammary gland	Solid carcinoma	Tumor	Malignant
75	2013	P5625458	D13-695	canine	ชิบิ	คุณสุชาดา เเดวงไสว	Female	mixed	4	Mass at mammary gland	Mucinous adenocarcinoma	Tumor	Malignant
76	2013	P5625395	D13-693	canine	ตะนอย	คุณสุทธิพันธ์ ถนอมพันธ์	Female	Pekingese	11	Mass at mammary gland	complex carcinoma	Tumor	Malignant
77	2013	P5625366	D13-709	canine	เเจม	คุณดวงกร วิเศษดำรง	Female	Mixed	4	Mass at mammary gland	Simple carcinoma (Solid carcinoma)	Tumor	Malignant
78	2013	P5624960	D13-545	canine	จุ้นจ้าน	คุณพีรพงษ์ เพ็ชร	Female	mixed	10	Mass at mammary gland	complex carcinoma	Tumor	Malignant
79	2013	P5625459	D13-696	canine	กาแฟ	คุณอังคณา วงษา	Female	mixed	5	Mass at mammary gland	Simple carcinoma (Anaplastic type)	Tumor	Malignant
80	2013	P5522620	D13-001	canine	จิ๋ว	คุณสุดารัตน์ จันทรวงศ์	Female	mixed	7	Mass at mammary gland	Mixed mammary gland tumor	Tumor	Malignant
81	2013	P5302289	D13-015	canine	สตัง	คุณบังอร สายวา	Female	mixed	15	Mass at mammary gland	Anaplastic carcinoma	Tumor	Malignant
82	2013	P5623391	D13-091	canine	กล้วยไข่	คุณพัชราวลัย เอี่ยมรัศมี	Female	mixed	10	Mass at mammary gland	Solid carcinoma	Tumor	Malignant
83	2013	P5623238	D13-055	canine	ลำดวน	คุณธีรา สุขสวัสดิ์ ณ อยุธยา	Female	Cocker Spaniel	9	Mass at mammary gland	Mixed mammary gland tumor	Tumor	Malignant
84	2013	P5623445	D13-113	canine	เข็มทอง	คุณเบญจพร หอมจิตต์	Female	mixed	10	Mass at mammary gland	Fibrosarcoma	Tumor	Malignant
85	2013	P5623354	D13-077	canine	นิล	คุณวิไลลักษณ์ วอร์เเร็กซ์	Female	mixed	10	Mass at mammary gland	Anaplastic carcinoma	Tumor	Malignant
86	2013	P5626380	D13-991	canine	ปีโป้	คุณดวงเดือน ชายวัง	Female	mixed	10	Mass at mammary gland	complex carcinoma	Tumor	Malignant
87	2013	P5626331	D13-957	canine	โอรีโอ้	คุณกณัฐณา รณิตชยกุล	Female	Labrador Retriever	9	Mass at mammary gland	Tubulopapillary carcinoma	Tumor	Malignant
88	2013	P5623995	D13-1037	canine	สีสวาท	คุณชนัตถ์ สุทธวรรณ	Female	Chihuahua	14	Mass at mammary gland	complex carcinoma	Tumor	Malignant
89	2013	P5626793	D13-1095	canine	น้องใหม่	คุณวนาพิศ นันทพันธ์	Female	mixed	6	Mass at mammary gland	Simple carcinoma	Tumor	Malignant
90	2013	P5626236	D13-927	canine	ไวท์	คุณชลิดา	Female	mixed	6	Mass at mammary gland	Malignant mixed tumor	Tumor	Malignant
91	2013	P5626830	D13-1122	canine	จูเนียร์	คุณเลขา จาวจา	Female	Poodle	8	Mass at mammary gland	Malignant mixed tumor	Tumor	Malignant
92	2013	P5626895	D13-1132	canine	เอมมิลี	คุณทิพย์สุดา ดูสว่าง	Female	Beagle	8	Mass at mammary gland	Mammary gland adenocarcinoma	Tumor	Malignant
93	2013	P5626925	D13-1133	canine	เลน	คุณกนกวรรณ ช่างสุพรรณ	Female	Mixed	14	Mass at mammary gland	fibrosarcoma	Tumor	Malignant
94	2013	P5624378	D13-368	canine	ขี้เหร่	คุณณัฐวี พรหมวังศรี	Female	Mixed	10	Mass at mammary gland	Mixed mammary gland tumor	Tumor	Malignant
95	2013	P5624442	D13-412	canine	สดใส	คุณอริยาภัณฑ์ ศรีวิลัย	Female	pug	7	Mass at mammary gland	Tubulopapillary carcinoma	Tumor	Malignant
96	2013	P5624245	D13-318	canine	ซินดี้	คุณฟองจันทร์ จินาทิพย์	Female	mixed	11	Mass at mammary gland	complex carcinoma	Tumor	Malignant
97	2013	P5624724	D13-487	canine	จีน่า	คุณเอื้อมพร	Female	Poodle	10	Mass at mammary gland	Tubulopapillary carcinoma	Tumor	Malignant
98	2013	P5410982	D13-416	canine	ฟักทอง	คุณสุจิรา อมรสุวรรณ	Female	shitzu	11	Mass at mammary gland	Squamous cell metaplasia of mammary gland	Tumor	Benign
99	2013	P5410609	D13-574	Feline	แตงโม	คุณอมาพร ใจห้าว	Female	DSH	13	Mass at mammary gland	Solid carcinoma	Tumor	Malignant
100	2013	P5624992	D13-552	canine	เนเน่	คุณอรุณี เผ่าพงษ์	Female	Poodle	9	Mass at mammary gland	malignant mixed mammary glant tumor	Tumor	Malignant
101	2013	P5412732	D13-546	canine	จ๊อบเเจ๊บ	คุณกมลวรรณ จันทร์วงษ์	Female	Poodle	9	Mass at mammary gland	Tubulopapillary carcinoma	Tumor	Malignant
102	2013	P5410759	D13-601	canine	บีโธเฟ่น	คุณอำนวย ชิดทอง	Female	mixed	13	Mass at mammary gland	complex carcinoma	Tumor	Malignant
103	2013	P5303103	D13-474	canine	เเดง	คุณพร เเก่นเมือง	Female	mixed	13	Mass at mammary gland	Solid carcinoma	Tumor	Malignant
104	2013	P5628409	D13-1598	canine	ดุ๊กดิ๊ก	คุณจินต์ บุญยะ	Female	mixed	15	Mass at mammary gland	Simple carcinoma (Solid type)	Tumor	Malignant
105	2013	P5627914	D13-1406	canine	โอเลี้ยง	คุณณัฐฑิมล คำทิพย์	Female	Poodle	7	Mass at mammary gland	Benign mixed tumor	Tumor	Benign
106	2013	P5626055	D13-850	canine	จิ่งหง	คุณจิราพร กิตติคุณชัย	Female	Poodle	10	Mass at mammary gland	Solid carcinoma (Complex type)	Tumor	Malignant
107	2013	P5626002	D13-845	canine	จุ๊บจิ๊บ	คุณเเสงจันทร์ นันทขว้าง	Female	mixed	8	Mass at mammary gland	Tubulopapillary carcinoma	Tumor	Malignant
108	2013	P5625264	D13-751	canine	ลำไย	คุณจารุวรรณ จันทร์สุวรรณ	Female	Poodle	16	Mass at mammary gland	Simple carcinoma (Solid carcinoma)	Tumor	Malignant
109	2013	P5626066	D13-860	canine	หมูหยอง	คุณสุดารัตน์ คุ้มเเคว้น	Female	Poodle	10	Mass at mammary gland	Osteosarcoma	Tumor	Malignant
110	2013	P5626068	D13-857	canine	ตูมตาม	คุณชัยยะ วงศ์ตระกูลเล็ก	Female	mixed	9	Mass at mammary gland	Simple carcinoma (Anaplastic type)	Tumor	Malignant
111	2013	P5625743	D13-783	canine	โอโม่	คุณบุณยวีร์ ทนทาน	Female	mixed	10	Mass at mammary gland	Squamous cell carcinoma	Tumor	Malignant
112	2013	P5627112	D13-1195	Feline	เเม้ว	คุณยุพิน กิติยศ	Female	DSH	8	Mass at mammary gland	Tubulopapillary carcinoma	Tumor	Malignant
113	2013	P5307245	D13-1202	canine	เจี้ยว	คุณประเสริฐ บุญเรือง	Female	mixed	10	Mass at mammary gland	Malignant mixed tumor	Tumor	Malignant
114	2013	P5623445	D13-1249	canine	เข็มทอง	คุณเบญจพร หอมจิตต์	Female	mixed	10	Mass at mammary gland	Simple carcinoma (Anaplastic type)	Tumor	Malignant
115	2013	P5627214	D13-1227	canine	เจสซี่	คุณชาติชาย พรหมมั่ง	Female	Golden Retriever	11	Mass at mammary gland	Tubulopapillary carcinoma	Tumor	Malignant
116	2013	P5522111	D13-1199	canine	ลักกี้	คุณลัดดาวรรณ	Female	Labrador Retriever	4	Mass at mammary gland	Benign mixed tumor	Tumor	Benign
117	2013	P5628065	D13-1453	canine	Donut	คุณปราจีน ประเสริฐสังข์	Female	mixed	14	Mass at mammary gland	Simple carcinoma (Anaplastic type)	Tumor	Malignant
118	2013	P5627222	D13-1264	canine	อองฟอง	คุณอรุณศรี บัวเรือง	Female	Poodle	16	Mass at mammary gland	Simple carcinoma (Anaplastic type)	Tumor	Malignant
119	2013	P5627309	D13-1265	canine	เพชร	คุณสิริรัตน์ พึ่งชมภู	Male	mixed	11	Mass at mammary gland	Simple carcinoma (Anaplastic type)	Tumor	Malignant
120	2013	P5628284	D13-1525	Feline	เเจ๊กการิน	คุณถนิม ฟันเด้นโบการ์ด	Female	DSH	6	Mass at mammary gland	Tubulopapillary carcinoma	Tumor	Malignant
121	2013	P5628052	D13-1486	canine	น้ำหวาน	คุณทวีชัย เเก้วไหลมา	Female	mixed	6	Mass at mammary gland	complex carcinoma	Tumor	Malignant
122	2013	P5625411	D13-1456	canine	น้ำตาล	คุณธีรพงศ์ เลิศชูสกุล	Female	mixed	10	Mass at mammary gland	Tubulopapillary carcinoma	Tumor	Malignant
123	2013	P5627976	D13-1440	canine	หนูเล็ก	คุณพรพิมล เจริญสุข	Female	Poodle	9	Mass at mammary gland	Cystadenocarcinoma	Tumor	Malignant
124	2013	P5627980	D13-1438	canine	ขนุน	คุณสมศรี อินทอง	Female	Golden Retriever	7	Mass at mammary gland	Cystadenocarcinoma	Tumor	Malignant
125	2013	P5517531	D13-1475	canine	สีหมอก	คุณบุญเตียม ชนันไชย	Female	Golden Retriever	10	Mass at mammary gland	complex carcinoma	Tumor	Malignant
126	2013	P5414249	D13-1487	canine	ลาล่า	คุณยุคล นิมมานเหมินทร์	Female	Labrador Retriever	11	Mass at mammary gland	Simple carcinoma (Anaplastic type)	Tumor	Malignant
127	2013	P5627734	D13-1354	canine	แฟนต้า	คุณวชิรา คำฤทธิ์	Female	Mixed	10	Mass at mammary gland	complex carcinoma	Tumor	Malignant
128	2013	P5517531	D13-1475	canine	สีหมอก	คุณบุญเตียม ชนันไชย	Female	Golden Retriever	10	Mass at mammary gland	complex carcinoma	Tumor	Malignant
129	2013	P5414249	D13-1487	canine	ลาล่า	คุณยุคล นิมมานเหมินทร์	Female	Labrador Retriever	11	Mass at mammary gland	Simple carcinoma (Anaplastic type)	Tumor	Malignant
130	2013	P5627734	D13-1354	canine	แฟนต้า	คุณวชิรา คำฤทธิ์	Female	Mixed	10	Mass at mammary gland	complex carcinoma	Tumor	Malignant
131	2014	P5521003	D14-065	canine	โฟกัส	คุณอำพร อ่อนใจ	Female	mixed	15	Mass at mammary gland	Simple carcinoma (Anaplastic type) with sclerosis	Tumor	Malignant
132	2014	P5628284	D14-070	Feline	เเจ๊กการิน	คุณถนิม พันเด้น โปการ์ด	Female	DSH	7	Mass at mammary gland	Tubulopapillary carcinoma	Tumor	Malignant
133	2014	P5729620	D14-127	canine	ฟิว	คุณวันสว่าง เย็นสบายดี	Female	Mixed	10	Mass at mammary gland	Simple carcinoma(Tubulopapillary type)	Tumor	Malignant
134	2014	P5305422	D14-159	canine	ฟอร์ต	คุณวิลาวัลย์ ใจกันทะ	Female	Poodle	3	Mass at mammary gland	Cystadenocarcinoma	Tumor	Malignant
135	2014	P5729766	D14-252	canine	เเมมโม้	คุณรุ่งนภา ศักดาทร	Female	Mixed	12	Mass at mammary gland	Simple carcinoma(Solid type)	Tumor	Malignant
136	2014	P5729745	D14-173	Feline	น้องพลอย	คุณวนิดา วงษา	Male	DSH	16	Mass at mammary gland	Malignant mixed tumor	Tumor	Malignant
137	2014	P5729271	D14-081	canine	บะหมี่	คุณวาสนา พัฒนนิรมาน	Female	Golden Retriever		Mass at mammary gland	Simple carcinoma(Solid type)	Tumor	Malignant
138	2014	P5302234	D14-082	canine	น้ำตาล	คุณสิริรักษณ์ ศิริเขตต์	Female	Cocker Spaniel	6	Mass at mammary gland	Benign mixed tumor	Tumor	Benign
139	2014	P5730317	D14-321	canine	มีมี่	คุณบุษราภรณ์ ไชยพรมมา	Female	Shitzu	11	Mass at mammary gland	Simple carcinoma(Solid type)	Tumor	Malignant
140	2014	P5729335	D14-047	canine	ไมโล	คุณอัญชลิการ์ บาวเวนส์	Female	Mixed	10	Mass at mammary gland	Simple carcinoma(Solid type)	Tumor	Malignant
141	2014	P5627976	D14-230	canine	หนูเล็ก	คุณพรพิมล เจริญสุข	Female	Poodle	10	Mass at mammary gland	Malignant mixed tumor	Tumor	Malignant
142	2014	P5733760	D14-1440	canine	อรอิน	คุณวันเพ็ญ รัตนกมลกานต์	Female	Mixed	5	Mass at mammary gland	Fibrosarcoma	Tumor	Malignant
143	2014	P5735635	D14-2115	Feline	ข้าวกล่ำ	คุณสุรีย์	Female	American shorthair	8 mo	Mass at mammary gland	Mammary gland adenoma	Tumor	Benign
144	2014	P5729975	D14-300	canine	มู่หยง	คุณธีร พงศ์ศิริวรรณ	Female	Golden Retriever	5	Mass at mammary gland	Fibroma	Tumor	Benign
145	2014	P5627868	D14-1766	canine	ไอดอล	คุณเสาวลักษณ์ ธาตรี	Female	Pomeranian	9	Mass at mammary gland	Carcinoma in Situ	Tumor	Malignant
146	2014	P5733695	D14-1463	Feline	เบบี้		Female	Persian	9	Mass at mammary gland	Cystadenocarcinoma	Tumor	Malignant
147	2014	P5734140	D14-1574	canine	ทองขาว	คุณธนะ เเสงจิตร	Female	Mixed	12	Mass at mammary gland	Simple carcinoma(Solid type)	Tumor	Malignant
148	2014	P5732057	D14-1292	canine	เต้าฮวย	คุณศิริกัญญา ปามา	Female	Mixed	8	Mass at mammary gland	Simple carcinoma (Anaplastic type)	Tumor	Malignant
149	2014	P5518048	D14-1402	canine	สำลี	คุณปานทอง บุญประคอง	Female	Mixed	12	Mass at mammary gland	Squamous cell carcinoma	Tumor	Malignant
150	2014	P5734951	D14-1826	canine	มีโชค	คุณพรทิพย์ คำจันทร์	Female	Shitzu	17	Mass at mammary gland	Simple carcinoma(Tubulopapillary type)	Tumor	Malignant
151	2014	P5300810	D14-1825	canine	ดาวเรือง	คุณนัทธมน อุทธานนท์	Female	Poodle	6	Mass at mammary gland	Simple carcinoma (Anaplastic type)	Tumor	Malignant
152	2014	P5625032	D14-1975	canine	ถุงเท้า	คุณพรรณนา ชุ่มบัวทอง	Female	Mixed	10	Mass at mammary gland	Complex adenocarcinoma	Tumor	Malignant
153	2014	P5735985	D14-2148	canine	บุญอุ้ม	คุณรุ้งเพชร จอมดวง	Female	Poodle	12	Mass at mammary gland	Complex adenoma	Tumor	Benign
154	2014	P5736441	D14-2252	canine	โบนัส	คุณสุลิดา อินยม	Female	Shitzu	9	Mass at mammary gland	Benign mixed tumor	Tumor	Benign
155	2014	P5306811	D14-695	canine	ชมพู่	คุณหญิง ดวงจันทร์	Female	Poodle	10	Mass at mammary gland	Complex carcinoma	Tumor	Malignant
156	2014	P5732325	D14-947	canine	คุ๊กกี้	คุณชุตินิษฐ์	Female	Poodle	10	Mass at mammary gland	Simple carcinoma(Tubulopapillary type)	Tumor	Malignant
157	2014	P5305422	D14-907	canine	ฟอร์ต	คุณวิลาวัลย์ ใจกันทะ	Female	Poodle	3	Mass at mammary gland	Anaplastic carcinoma	Tumor	Malignant
158	2014	P5730750	D14-479	canine	โกโก้	คุณจรูญ พรหมสวัสดิ์	Female	Mixed	6	Mass at mammary gland	Simple carcinoma(Solid type)	Tumor	Malignant
159	2014	P5729954	D14-529	canine	หยินหยาง	คุณสุคนธ์ทิพย์ จันทนะ	Female	Pug	11	Mass at mammary gland	Complex carcinoma	Tumor	Malignant
160	2014	P5304239	D14-594	canine	ดุกดิก	คุณกชกร ศิริบุญญพัฒน์	Female	Poodle	9	Mass at mammary gland	Simple carcinoma(Solid type)	Tumor	Malignant
161	2014	P5730866	D14-629	canine	Happy	คุณอมรรัตน์ ชัยอาจ	Female	Poodle	10	Mass at mammary gland	Benign mixed tumor	Tumor	Benign
162	2014	P5731026	D14-575	Feline	ไข่มุก	คุณณัฐยา อุ่นอารี	Female	DSH	10	Mass at mammary gland	Simple carcinoma(Solid type)	Tumor	Malignant
163	2014	P5721360	D14-688	Feline	ถั่วแปป	คุณดาวผกาย พิสิษฐกุล	Female	DSH	1	Mammary gland tissue	Mammary gland hyperplasia with mild degree of inflammation	Non-tumor
164	2014	P5627765	D14-689	canine	ไข่พะโล้	คุณวิยะดา ทรายคำ	Female	Cocker Spaniel	10	Mass at mammary gland	Simple carcinoma (Anaplastic type)	Tumor	Malignant
165	2014	P5731551	D14-748	canine	อ้อยควั่น	คุณจารุวรรณ จันทร์สุวรรณ์	Female	Poodle	7	Mass at mammary gland	Complex adenoma	Tumor	Benign
166	2014	P5730840	D14-702	Feline	นวล	คุณอัญพัชร์ สิริศรีพงศ์	Female	DSH	1	Mass at mammary gland	Simple carcinoma(Tubulopapillary type)	Tumor	Malignant
167	2014	P57300311	D14-320	canine	หนุงหนิง	คุณพรพิมล อมรเสนารักษ์	Female	Mixed	9	Mass at mammary gland	Malignant mixed tumor	Tumor	Malignant
168	2014	P5730020	D14-247	canine	ฟักทอง	คุณเสาวนีย์ ชัยชาญ	Female	Shitzu	14	Mass at mammary gland	Tubulopapillary carcinoma	Tumor	Malignant
169	2014	P5519910	D14-1955	canine	รถถัง	คุณนงนภัส ยูงพณา	Female	Bull dog	13	Mass at mammary gland	Squamous cell carcinoma	Tumor	Malignant
170	2014	P5732017	D14-863	canine	เลดี้	พระภัทรภูมิ อธิปุญโญ	Female	Mixed	15	Mass at mammary gland	Simple carcinoma (Anaplastic type)	Tumor	Malignant
171	2014	P5733545	D14-1363	canine	ปุกปุย	คุณประพร ฑีฆะส้อม	Female	Spitz	15	Mass at mammary gland	Complex adenoma	Tumor	Benign
172	2014	P5307767	D14-1573	canine	ปังปิ้ง	คุณธนาวรรณ ภู่ทอง	Female	Mixed	10	Mass at mammary gland	Cystadenoma	Tumor	Benign
173	2014	P5733788	D14-1507	canine	บุษบา	คุณกรณ์วิภา	Female	Poodle	14	Mass at mammary gland	Complex carcinoma	Tumor	Malignant
174	2014	P5734151	D14-1589	canine	โดนัท	คุณนรชาติ อัติวานิช	Female	Mixed	10	Mass at mammary gland	Cystadenocarcinoma	Tumor	Malignant
175	2014	P5729548	D14-100	canine	แพม	คุณพรชรัตน์ จตุรพรพันธ์	Female	Mixed	5	Mass at mammary gland	Simple carcinoma(Solid type)	Tumor	Malignant
176	2014	P5733456	D14-1366	canine	โซดา	คุณสิริสิน ชางคำ	Female	Poodle	7	Mass at mammary gland	Simple carcinoma(Tubulopapillary type)	Tumor	Malignant
177	2014	P5629072	D13-1770	canine	จินนี่	คุณผาสุก ทัพยุทธพิจารณ์	Female	Poodle	13	Mass at mammary gland	Simple carcinoma(Tubulopapillary type)	Tumor	Malignant
178	2014	P5732356	D14-995	canine	ถุงทอง	คุณสาวิตรี ถาปิรยศ	Female	Mixed	10	Mass at mammary gland	Tubulopapillary carcinoma	Tumor	Malignant
179	2014	P5732558	D14-1059	canine	ปุ๊กปิ๊ก	คุณวลันธร โกมลรัตน์	Female	Shitzu	11	Mass at mammary gland	Simple carcinoma (Anaplastic type)	Tumor	Malignant
180	2014	P5300993	D14-1141	canine	บุญมาร์	คุณอัจฉรา ชัยประสิทธิ์	Female	Yorkshire Terrier	11	Mass at mammary gland	Simple carcinoma(Solid type)	Tumor	Malignant
181	2014	P5732427	D14-996	canine	เเป้ง	คุณไกรสร เลาหชนะกูร	Female	GR	6	Mass at mammary gland	Collagenous harmatoma	Non-tumor
182	2014	P5732508	D14-1001	canine	เป๊ปซี่	คุณอัจฉรา ศรีตระกูล	Female	Poodle	5	Mass at mammary gland	Complex carcinoma	Tumor	Malignant
183	2014	P5732057	D14-896	canine	เต้าฮวย	คุณศิริญญา ปามา	Female	Poodle	8	Mass at mammary gland	Myxosarcoma	Tumor	Malignant
184	2014	P5732178	D14-905	canine	ทองทอง	คุณทรงพันธ์ ตันตระกูล	Female	Mixed	10	Mass at mammary gland	Tubulopapillary carcinoma	Tumor	Malignant
185	2014	P5732174	D14-906	canine	ขวัญตา	คุณกู้เกียรติ บัวเจ็ดธรรม	Female	Poodle	7	Mass at mammary gland	Complex carcinoma	Tumor	Malignant
186	2014	P5732849	D14-1164	canine	ผักกาด	คุณไพรบูลย์ จารุสวัสดิ์	Female	mixed	5	Mass at mammary gland	Simple carcinoma (Anaplastic type)	Tumor	Malignant
187	2014	P5411562	D14-2038	canine	ถุงเงิน	คุณสานนท์ นพคุณ	Female	French bulldog	5	Mass at mammary gland	Simple carcinoma(Solid carcinoma)	Tumor	Malignant
188	2014	P5735821	D14-2078	canine	เเอบ	คุณจำปา ชัยกาวิล	Female	Mixed	8	Mass at mammary gland	Fibrosarcoma	Tumor	Malignant
189	2014	P5735821	D14-2078	canine	เเอบ	คุณจำปา ชัยกาวิล	Female	Mixed	8	Mass at mammary gland	Fibrosarcoma	Tumor	Malignant
190	2014	P5517408	D14-341	canine	นิลกาฬ	คุณสงวนศรี เรืองวงศ์	Female	Poodle	14	Mass at mammary gland	Simple carcinoma (Anaplastic type)	Tumor	Malignant
191	2015	P5843374	D15-2363	canine	ปีใหม่	คุณชลียา บุตรจันทร์	Female	Bangkaew	12	Mass at mammary gland	Simple carinoma (Solid type)	Tumor	Malignant
192	2015	P5519910	D14-1955	Canine	รถถัง	คุณนงนภัส ยูงพณา	Female	Bull dog	13	Mass at mammary gland	Squamous cell carcinoma	Tumor	Malignant
193	2015	P5733257	D15-2844	Canine	โมโม่จัง	คุณอุษา สุตะวงศ์	Female	Shitzu	15	Mass at mammary gland	Simple carcinoma ( Tubulopapillary type)	Tumor	Malignant
194	2015	P5844833	D15-2886	Canine	เเมม	คุณพงศักดิ์ ธรรมดิน	Female	Mixed	15	Mass at mammary gland	Spindle cell carcinoma	Tumor	Malignant
195	2015	P5520530	D15-0427	Canine	เกี๊ยวซ่า	คุณอังคณา นัตสาสาร	Female	Cocker Spaniel	10	Mass at left mammary gland	Complex carcinoma	Tumor	Malignant
196	2015	P5837125	Mass+B193:N193+A192:N193 at mammary gland	Canine	เลดี้	คุณภัควิชา ณ เชียงใหม่	Female	Poodle	8	Mass at left inguinal mammary gland	Tubulopapillary carcinoma	Tumor	Malignant
197	2015	P5836830	D15-0212	Canine	สุมาลี	คุณ Josh Inman	Female	Poodle	10	Mass at mammary gland	Complex carcinoma	Tumor	Malignant
198	2015	P5414692	D15-2142	Canine	น้ำพริกอ่อง	คุณเกื้อกูล มณีศรี	Female	Labrador Retriever	10	Mass at mammary gland	Squamous cell carcinoma	Tumor	Malignant
199	2015	P5300620	D15-2400	Canine	เเตงกวา	คุณอัจฉริย์ญาณี	Female	Poodle	9	Mass at mammary gland	Simple carcinoma ( Tubulopapillary type)	Tumor	Malignant
200	2015	P5840774	D15-2270	Canine	ถุงทอง	คุณอุไรวรรณ	Female	Mixed	4	Mass at mammary gland	Simple carinoma (Solid type)	Tumor	Malignant
201	2015	P5835924	D15-1087	Canine	นู๋ดี	คุณสุวีณา ถุงเเก้ว	Female	Pug	2	Mass at mammary gland	Mammary gland cystadenoma	Tumor	Benign
202	2015	P5628665	D15-2066	Canine	ข้าวเเตน	คุณเข็มเพชร ฮวดสำราญ	Female	Poodle	7	Mass at mammary gland	Benign mixed mammary gland tumor	Tumor	Benign
203	2015	P5841161	D15-1520	Canine	บ๊อบบี้	คุณณัชชา วรรณฤทธิ์	Female	Mixed	12	Mass at mammary gland	Simple carinoma (Solid type)	Tumor	Malignant
204	2015	P5729241	D15-0585	Canine	หนูดำ	คุณกฤติยา จักรสาร	Female	Mixed	15	Mass at mammary gland	Simple carcinoma ( Tubulopapillary type)	Tumor	Malignant
205	2015	P5837728	D15-0418	Canine	เปอรติ้ส	คุณสุดา สนธิ	Female	Shitzu	15	Mass at mammary gland	Simple carinoma (Solid type)	Tumor	Malignant
206	2015	P5841851	D15-1807	Canine	เจ้าหมี	คุณประสิทธิ โพธินาม	Female	Mixed	10	Mass at mammary gland	Fibrosarcoma	Tumor	Malignant
207	2015	P5841851	D15-1807	Canine	เจ้าหมี	คุณประสิทธิ โพธินาม	Female	Mixed	10	Mass at mammary gland	Complex carcinoma	Tumor	Malignant
208	2015	P5837529	D15-0417	Canine	พลอย	คุณเเสงดาว ศาสตร์พงษ์พันธุ์	Female	Shitzu	9	Mass at mammary gland	Simple carcinoma ( Tubulopapillary type)	Tumor	Malignant
209	2015	P5839672	D15-1482	Canine	น้ำหวาน	คุณวิลัย เขาเเท่น	Female	Poodle	11	Mass at mammary gland	Mammary glnad adenoma	Tumor	Benign
210	2015	P5521244	D15-1498	Canine	มอมแมม	คุณสนิท ทามณีวัน	Female	mixed	8	Mass at mammary gland	Simple carinoma (Solid type)	Tumor	Malignant
211	2015	P5840480	D15-1445	Canine	ฟร้อน	คุณดาวเรือง สุขเกิด	Female	Cocker Spaniel	10	Mass at mammary gland	Simple carcinoma (Anaplastic type)	Tumor	Malignant
212	2015	P5734522	D14-1709	Canine	หมูหยอง	คุณสุลี วงกุฎ	Female	Shitzu	11	Mass at mammary gland	Complex adenoma	Tumor	Benign
213	2015	P5843179	D15-2318	Canine	แน็ท	คุณธนกฤต ขันธรรม	Female	Mixed	11	Mass at mammary gland	Benign mixed mammary gland tumor	Tumor	Benign
214	2015	P5841898	D15-1961	Canine	จีจี้		Female	Cocker Spaniel	11	Mass at mammary gland	Mixed mammary gland tumor	Tumor	Malignant
215	2015	P5838056	D15-0495	Canine	เฉาก๊วย	คุณกัลยา เหล่าพนักสัก	Male	Poodle	15	Mass at mammary gland	Complex carcinoma	Tumor	Malignant
216	2015	P5410891	D15-2457	Canine	Smiley	คุณอุษา เขียวรอด	Female	Golden Retriever	6	Mass at mammary gland	Simple carcinoma (cystic-papillary type)	Tumor	Malignant
217	2015	P5837922	D15-0443	Canine	ไข่หวาน	คุณวิไลพัชร กาญจนชาติ	Female	Poodle	9	Mass at mammary gland	Cysadenocarcinoma	Tumor	Malignant
218	2015	P5307246	D15-1519	Canine	ไข่เจียว	คุณประเสริฐ บุญเรือง	Female	Poodle	12	Mass at mammary gland	Simple carcinoma ( Tubulopapillary type)	Tumor	Malignant
219	2015	P5837434	D15-0401	Feline	มันนี่	คุณจิราภรณ์ รักชาติ	Female	DSH	12	Mass at mammary gland	Mammary gland cystadenoma	Tumor	Benign
220	2015	P5841074	D15-1496	Canine	โย่	คุณจันทร์นวล จันวงศ์	Female	Mixed	9	Mass at mammary gland	Tubulopapillary carcinoma	Tumor	Malignant
221	2015	P5837319	D15-0261	Canine	ขนมครก	คุณสุพรรณ เกตุสิงห์สร้อย	Female	Poodle	10	Mass at mammary gland	Complex carcinoma	Tumor	Malignant
222	2015	P5840186	D15-1175	Canine	เเตงโม	คุณพงศ์ศิริ ปิตุวัฒน์เจริญกุล	Female	Poodle	10	Mass at mammary gland	Simple carcinoma ( Tubulopapillary type)	Tumor	Malignant
223	2015	P5839672	D15-1007	Canine	น้ำหวาน	คุณวิลัย เขาเเท่น	Female	Poodle	11	Mass at mammary gland	Simple carcinoma ( Tubulopapillary type)	Tumor	Malignant
224	2015	P5838145	D15-0518	Canine	ถั่วเหลือง	คุณดารณี อังกฤษ	Male	Pit Bull	5	Mass at mammary gland	Simple carcinoma ( Tubulopapillary type)	Tumor	Malignant
225	2015	P5413012	D15-0496	Canine	แทมมี่	คุณอังคณา ตุ้ยทา	Female	Labrador Retriever	7	Mass at mammary gland	Simple carcinoma ( Tubulopapillary type)	Tumor	Malignant
226	2015	P5519189	D15-2807	Canine	โรบิน	คุณเจตศรัญณ์	Female	Miniature Pinscher	11	Mass at mammary gland	Benign mixed mammary tumor	Tumor	Benign
227	2015	P5729766	D15-1745	Canine	แมมโบ้	คุณรุ่งนภา ศักดาทร	Female	Mixed	13	Mass at mammary gland	Fibrosarcoma	Tumor	Malignant
228	2015	P5840431	D15-1246	Canine	แก้ว	คุณอำนวยศักดิ์ สิทธิเสนา	Male	Mixed	7	Mass at mammary gland	Simple carcinoma ( Tubulopapillary type)	Tumor	Malignant
229	2015		D15-1155	Canine	จิ่งจัง	คุณกมลพร มีมั่งคั่ง	Female	Shitzu	5	Mass at mammary gland	Complex adenoma	Tumor	Benign
230	2015	P5840246	D15-1176	Canine	หมีมี้	คุณสิริวรางค์ ปัญญาเเก้ว	Female	Poodle	11	Mass at mammary glanf	Benign mixed mammary tumor	Tumor	Benign
231	2015	P5839402	D15-1194	Canine	ข้าวปุ้น	ึคุณรัตนาภรณ์ เมฆานิมิตดี	Female	Poodle	12	Mass at mammary gland	Simple carcinoma ( Tubulopapillary type)	Tumor	Malignant
232	2015	P5840352	D15-1208	Canine	มอมเเมม	คุณรุ่งนภา ผิวทอง	Male	Mixed	10	Mass at mammary gland	Simple carcinoma (Solid type)	Tumor	Malignant
233	2015	P5414384	D15-1685	Canine	จูลี่	คุณเมฆินทร์	Female	Cocker Spaniel	9	Mass at mammary gland	Fibrosarcoma	Tumor	Malignant
234	2015	P5843197	D15-2319	Canine	ตุ้มเงิน	คุณบุณยนุช ใจบันทัด	Female	Poodle	9	Mass at mammary gland	Malignant mixed tumor	Tumor	Malignant
235	2015	P5303972	D15-2250	Canine	New	คุณวสันต์ อนันต๊ะ	Female	Cocker Spaniel	9	Mass at mammary gland	Simple carcinoma (Solid type)	Tumor	Malignant
236	2015	P5730867	D15-2251	Canine	น้ำตาล	คุณสุดใจ เเสงเเก้ว	Female	Shitzu	13	Mass at mammary gland	Simple carcinoma (Solid type)	Tumor	Malignant
237	2015	P5842060	D15-1896	Canine	โลตัส	คุณอัมพร จินดา	Female	LR	10	​Mammary gland	Suppurative dermatitis	Non-tumor
238	2015	P5841281	D15-1945	Canine	น้องเเบม	คุณณัฐวรรณ	Female	Mixed	13	Mass at mammary gland	Basal cell adenoma	Tumor	Benign
239	2015	P5841987	D15-1897	Canine	ไทเกอร์	คุณสิริอัจฉรา	Female	Mixed	7	Mass at mammary gland	Benign mixed mammary gland tumor	Tumor	Benign
240	2015	P5838880	D15-1628	Canine	ปุย	คุณพาฝัน	Female	Poodle	15	Mass at mammary gland	Simple carcinoma (Solid type)	Tumor	Malignant
241	2015	P5733704	D14-1472	Feline	แม่เเมว	คุณปิยนุช โพธาเจริญ	Female	Siamese	10	Mass at mammary gland	Simple carcinoma ( Tubulopapillary type)	Tumor	Malignant
242	2014	P5627680	D14-1542	Canine	มู่หลาน	คุณวิภาวี เเต้เจริญ	Female	Mixed	6	Mass at mammary gland	Complex carcinoma	Tumor	Malignant
243	2015	P5518727	D14-1430	Canine	คิตตี้	คุณพงศ์ศักดิ์ ลือสุวรรณกิจ	Female	Bangkaew	10	Mass at mammary gland	Simple carcinoma (Anaplastic type)	Tumor	Malignant
244	2015	P5733898	D14-1498	Canine	จาว่า	คุณศุภนิตย์ เนตรตระสูตร	Female	Shitzu	12	Mass at mammary gland	Complex adenocarcinoma	Tumor	Malignant
245	2015	P5733383	D14-1310	Canine	ปิง	คุณบัวลอย คงคล	Female	Mixed	13	Mass at mammary gland	Simple carcinoma (Anaplastic type)	Tumor	Malignant
246	2015	P5838093	D15-0539	Feline	ทอง	คุณจุฑารัตน์ พิบูลย์	Female	DSH	12	Mass at mammary gland	Osteosarcoma	Tumor	Malignant
247	2015	P5625119	D14-2065	Canine	คิตตี้	คุณพรรณวลี	Female	Poodle	12	Mass at mammary gland	Cysadenocarcinoma	Tumor	Malignant
248	2015	P5732681	D14-1997	Canine	จูเนียร์	คุณพานิชย์ ศิลปเสริฐ	Female	Poodle	10	Mass at mammary gland	Lipid-rich mammary carcinoma with lymph node metastasis	Tumor	Malignant
249	2015	P5839635	D15-968	Canine	มูมู่	คุณพรชัย บุญธรรม	Female	Golden Retriever	7	Mass at mammary gland	Simple carcinoma (Solid type)	Tumor	Malignant
250	2015	P5839145	D15-0813	Canine	แพนดี้	คุณณัฐกานต์ บัวแก้วเกิด	Female	Mixed	14	Mass at mammary gland	Simple carcinoma ( Tubulopapillary type)	Tumor	Malignant
251	2015	P5839237	D15-0860	Canine	คนอร์	คุณพักตร์พิไล เเทนเทือก	Male	Golden Retriever	8	Mass at mammary gland	Simple carcinoma (Anaplastic type)	Tumor	Malignant
252	2015	P5624706	D15-2190	Canine	คิตตี้	คุณสุรีย์ เหวียนระวี	Female	Shitzu	15	Mass at mammary gland	Malignant mixed mammary gland tumor	Tumor	Malignant
253	2015	P5842613	D15-2100	Canine	โฟร์มด	คุณอุบลรัตน์ พันธ์เจริญพร	Female	Poodle	8	Mass at mammary gland	Benign mixed mammary gland tumor	Tumor	Benign
254	2015	P5736089	D15-1245	Canine	สำลี	คุณสังวร สังข์อร่าม	Female	Mixed	5	Mass at mammary gland	Tubulopapillary cystadenoma	Tumor	Benign
255	2015	P5302234	D15-0206	Canine	น้ำตาล	คุณศิริลักษณ์ ศิริเขตต์	Female	Cocker Spaniel	7	Mass at mammary gland, lymph node	Simple carcinoma ( Tubulopapillary type)	Tumor	Malignant
256	2015	P5838337	D15-0605	Canine	โม้โม้	คุณยุพา พงษ์วาท	Female	Spitz	5	Mass at mammary gland	Simple carinoma (Solid type)	Tumor	Malignant
257	2015	P5409966	D15-1085	Canine	แพนด้า	คุณเกศิณี เรือนคำ	Female	Golden Retriever	7	Mass at mammary gland	Fibrosarcoma	Tumor	Malignant
258	2015	P5842748	D15-2373	Canine	จิ๊บ	คุณบุญส่ง ไทยสา	Female	Mixed	9	Mass at mammary gland	Benign mixed mammary gland tumor	Tumor	Benign
259	2015	P5518711	D15-2269	Canine	อะตอม	คุณรุ่งทิวา สุมาลี	Female	Golden Retriever	12	Mass at mammary gland	Benign mixed mammary tumor	Tumor	Benign
260	2015	P5840431	D15-2067	Canine	แก้ว	คุณอำนวยศักดิ์ สินธิเสนา	Male	Mixed	7	Mass at mammary gland	Solid carcinoma with metastasis in the lymph node	Tumor	Malignant
261	2015	P5843790	D15-2496	Canine	ใบเตย	คุณไกรฤทธิ์ ธรรมถู	Female	Shitzu	6	Mass at mammary gland	Simple carcinoma (Solid type)	Tumor	Malignant
262	2015	P5839781	D15-2498	Canine	มดส้ม	คุณศรวณีย์ สุขุมวาท	Female	Cocker Spaniel	11	Mass at left mammary gland	Simple carinoma (Solid type)	Tumor	Malignant
263	2015	P5839520	D15-1041	Canine	เจ้าหล่อน		Female	Shitzu	14	Mass at mammary gland	Cystadenocarcinoma	Tumor	Malignant
264	2015	P5842464	58 B 239	Canine	พุดดิ้ง		Female	Mixed	10	Mass at mammary gland	Simple tubular adenocarcinoma	Tumor	Malignant
265	2015	P5410883	58 B 188	Canine	ร็อกกี้		Female	Mixed	10	Mass at mammary gland	Benign mixed mammary tumor	Tumor	Benign
266	2016	P5948092	D16-1048	Canine	เดอะวัน	คุณปรีชาวุฒิ นิรมร	Female	Siberian Husky	13	Mass at mammary gland	Simple carcinoma ( Tubulopapillary type)	Tumor	Malignant
267	2016	P5951391	D16-2470	Canine	หลง		Female	Mixed		Mass at mammary gland	Simple carcinoma ( Tubulopapillary type)	Tumor	Malignant
268	2016	P5952277	D16-2761	Canine	กล้วยหอม	คุณธัณชนก เอี่ยมสะอาด	Female	Siberian Husky	8	Mass at mammary gland	Simple carcinoma ( Tubulopapillary type)	Tumor	Malignant
269	2016	P5950386	D16-2004	Canine	หลง	คุณบุญนิธิ ทิวถาวระ	Female	Mixed	10	Mass at mammary gland	Simple carcinoma ( Tubulopapillary type)	Tumor	Malignant
270	2016	P5946142	D16-0495	Canine	มันนี่	คุณนิตยา ทรรศนียาภรณ์	Female	Poodle	10	Mass at mammary gland	Benign mixed mammary gland tumor, Osteosarcoma	Tumor	Malignant
271	2016	P5947606	D16-0888	Canine	มีสุข	คุณพัชรี ป้อมเผือก	Female	Mixed	8	Mass at mammary gland	Osteosarcoma	Tumor	Malignant
272	2016	P5950259	D16-1938	Canine	ปุ้มปุ้ย	คุณสุคนธทิพย์ สุขะหุต	Female	Mixed	15	Mass at mammary gland	Simple carcinoma ( Solid type)	Tumor	Malignant
273	2016	P5842149	D16-0909	Canine	ลีลี่	คุณปิยนุช ลีลารันพล	Female	Golden Retriever	11	Mass at mammary gland	Simple carcinoma ( Solid type)	Tumor	Malignant
274	2016	P5623392	D16-0165	Canine	ยุหว่า	คุณกุลรัศมี ชมภู	Female	Mixed	9	Mass at mammary gland	Simple carcinoma ( Solid type)	Tumor	Malignant
275	2016	P5949942	D16-1875	Canine	จุ๊บเเจง	คุณวัชรินทร์ ดาวเรือง	Female	Mixed	14	Mass at mammary gland	Complex carcinoma, Mixed mammary gland tumor	Tumor	Malignant
276	2016	P5945591	D16-0297	Canine	Baby	คุณทองทวี ศุภาคม	Female	German Sheperd	9	Mass at mammary gland	Benign mixed mammary gland tumor	Tumor	Benign
277	2016	P5736483	D16-0768	Canine	โคล่า	คุณมาลี สุระมิมทร์	Female	Shitzu	11	Mass at mammary gland	Benign mixed mammary gland tumor	Tumor	Benign
278	2016	P5945957	D16-0683	Canine	เดย์ซี่	คุณปียวิทย์ ภาวิจันทร์	Female	Labrador Retriever	10	Mass at mammary gland	Benign mixed mammary gland tumor	Tumor	Benign
279	2016	P5301412	D16-1620	Canine	เเม๊ว	คุณสาคร เสาร์เเปง	Female	Poodle	15	Mass at mammary gland	Benign mixed mammary gland tumor	Tumor	Benign
280	2016	P5844663	D16-1854	Canine	จ๊ะโอ๋	คุณนงลักษณ์ สารเวียง	Female	Shitzu	11	Mass at mammary gland	Simple carcinoma (anaplastic type)	Tumor	Malignant
281	2016	P5843665	D16-1888	Canine	ขาหมู	คุณกฤษณา	Female	Spitz	12	Mass at mammary gland	Simple carcinoma ( Solid type) with cyst	Tumor	Malignant
282	2016	P5950248	D16-1939	Canine	ชินล่า	คุณวีรยุทธ์ ธรรมใจกุล	Female	Shitzu	4	Mass at mammary gland	Mixed mammary gland tumor	Tumor	Malignant
283	2016	P5951632	D16-2493	Canine	หมูปิ้ง	คุณภัญญภัสสร์ ประทุมมินทร์	Female	Mixed	9	Mass at mammary gland	Simple carcinoma ( Solid type)	Tumor	Malignant
284	2016	P5623358	D16-3037	Canine	มินนี่	คุณอภิเชษฐ์ ณสุวรรณ	Female	Mixed	10	Mass at mammary gland	Fibrosarcoma	Tumor	Malignant
285	2016	P5946578	D16-2729	Canine	น้องเเบม	คุณสุนิสา เเสงสุวรรณ์	Female	Poodle	10	Mass at right mammary gland	Adrenocarcinoma	Tumor	Malignant
286	2016	P5952027	D16-2643	Canine	เฉาก๊วย	คุณฟองเเก้ว กองใจ	Female	Poodle	10	Mass at mammary gland	Simple carcinoma ( Tubulopapillary type)	Tumor	Malignant
287	2016	P5952009	D16-2642	Canine	Lucky	คุณวรัญญา สุขเเดง	Female	Mixed	14	Mass at mammary gland	Complex carcinoma was highly suspected	Tumor	Malignant
288	2016	P5730761	D16-1543	Canine	น้องดำ	คุณวัชรี ประเสริฐ	Female	Mixed	14	Mass at mammary gland	Mixed mammary gland tumor	Tumor	Malignant
289	2016	P5949471	D16-1685	Canine	จินนี่	คุณปารุดา อนันตกุลกำเนิด	Female	Chihuahua	11	Mass at mammary gland	Simple carcinoma ( Solid type)	Tumor	Malignant
290	2016	P5300620	D16-0248	Canine	เเตงกวา	คุณอัจฉรีย์ญาณี	Female	Poodle	9	Mass at mammary gland	Simple carcinoma ( Solid type)	Tumor	Malignant
291	2016	P5949736	D16-1828	Canine	ลินลิน		Female	Chow Chow	10	Mass at mammary gland	Mixed mammary gland tumor	Tumor	Malignant
292	2016	P5950322	D16-2155	Canine	เอาว์ฟี่	คุณเยาวเรศ มูลเมือง	Female	Shitzu	10	Mass at 4th mammary gland	Simple carcinoma ( Solid type)	Tumor	Malignant
293	2016	P5950322	D16-2155	Canine	เอาว์ฟี่	คุณเยาวเรศ มูลเมือง	Female	Shitzu	10	Mass at 3rd and 5th mammary gland	Mammary ductal hyperplasia with no evidence of tumor cell	Non-tumor
294	2016	P5950656	D16-2231	Canine	ถุงเงิน	คุณประภาวรินทร์ กันยานะ	Female	Mixed	6	Mass at mammary gland	Mammary ductal hyperplasia with cyst	Non-tumor
295	2016	P5951105	D16-2279	Canine	Gogo	คุณ Joy Huss	Female	Mixed	10	Mass at mammary gland	Complex carcinoma	Tumor	Malignant
296	2016	P5950174	D16-1937	Canine	พริกไทย	คุณจุฑามาศ	Female	Poodle	3	Mass at mammary gland	Mixed mammary gland tumor	Tumor	Malignant
297	2016	P5949220	D16-1903	Canine	ปุ้มปุ้ย	คุณภัทราภรณ์ บุญตุ้ย	Female	Mixed	10	Mass at mammary gland	Simple carcinoma ( Solid type)	Tumor	Malignant
298	2016	P5949231	D16-1654	Canine	กะทิ	คุณปิ่นวนา สิทธิวงค์	Female	Mixed		Mass at mammary gland	Simple carcinoma ( Solid type)	Tumor	Malignant
299	2016	P5949196	D16-1545	Canine	ดวง	คุณศตวรรต อินตา	Female	Mixed	12	Mass at mammary gland	Simple carcinoma ( Solid type)	Tumor	Malignant
300	2016	P5949637	D16-1800	Canine	เปอร์เซีย	คุณวิลัย สุมาลัย	Female	Shitzu	3	Mass at mammary gland	Complex carcinoma	Tumor	Malignant
301	2016	P5624913	D16-1405	Canine	มีมี่	คุณ Winifred Ho	Female	Yorkshire Terrier	10	Mass at mammary gland	Simple carcinoma ( Solid type)	Tumor	Malignant
302	2016	P5949611	D16-1572	Canine	อิฐ	คุณเกสร พรหมมี	Female	Mixed	15	Mass at mammary gland, inguinal lymph node	Simple carcinoma ( Anaplastic type) with inguinal lymph node metastasis	Tumor	Malignant
303	2016	P5948703	D16-1339	Canine	ยุกยิก	คุณจิตติมา สุคนธา	Female	Mixed	14	Mass at 5th mammary gland	Simple carcinoma ( Solid type)	Tumor	Malignant
304	2016	P5946324	D16-0524	Canine	น้ำตาล	คุณสุรัตน์ ใจสักเสริม	Female	Mixed	9	Mass at 3rd-5th left mammary gland	Benign mixed mammary gland tumor	Tumor	Benign
305	2016	P5520090	D16-0821	Canine	เฮง เฮง	คุณนริศรา ปราชญ์วีระกุล	Female	Shitzu	12	Mass at 3rd-5th mammary gland	Simple carcinoma (Tubulopapillary carcinoma)	Tumor	Malignant
306	2016	P5947802	D16-0978	Canine	เปปซี่	คุณสุปราณี โยกาศ	Female	Shitzu	10	Mass at the 4th-5th right mammary gland	Simple carcinoma (Solid type)	Tumor	Malignant
307	2016	P5947039	D16-0810	Canine	ฟักทอง	คุณปริศนา พิบูลย์	Female	Shitzu	13	Mass at the 2nd right mammary gland	Simple carcinoma (anaplastic carcinoma)	Tumor	Malignant
308	2016	P5947011	D16-1022	Canine	น้ำตาล	คุณโฉมสุดา หาญศิริชัย	Female	Mixed	9	Mass at the 4th left mammary gland	Benign mixed mammary gland tumor	Tumor	Benign
309	2016	P5945833	D16-0512	Canine	ดุ๊กดิ๊ก	คุณปิยะพงษ์ มงคลจันทร์	Female	Mixed	12	Mass at mammary gland	Complex carcinoma	Tumor	Malignant
310	2016	P5947536	D16-0911	Canine	จินนี่	คุณเกียรติศักดิ์	Female	Poodle	6	Mass at mammary gland	Complex carcinoma	Tumor	Malignant
311	2016	P5302592	D16-0684	Canine	หมีพูห์	คุณมนิสรา	Female	Mixed	12	Mass at the 4th right mammary gland	Complex carcinoma	Tumor	Malignant
312	2016	P5948328	D16-1188	Canine	น้องนัวร์	คุณธนวัน มังคละพฤกษ์	Female	Dachshund	11	Mass at the 4th-5th right mammary gland	Simple adenoma	Tumor	Benign
313	2016	P5412732	D16-0454	Canine	จ๊อบเเจ๊บ	คุณรัชนี จันทร์วงษ์	Female	Mixed	12	Mass at mammary gland	Simple carcinoma ( Tubulopapillary type)	Tumor	Malignant
314	2016	P5412869	D16-0496	Canine	โฟม	คุณจรูญศักดิ์ เพชรเเก้ว	Female	Cocker Spaniel	10	Mass at mammary gland	Noninfiltrating(in Situ) carcinomas	Tumor	Malignant
315	2016	P5946134	D16-0455	Canine	เเป๊ปซี่	คุณจิตราภรณ์ ดิษเลิศ	Female	German Sheperd	11	Mass at the 4th right mammary gland	Benign mixed mammary gland tumor	Tumor	Benign
316	2016	P5414747	D16-1233	Canine	ปังญ่า	คุณสราวุธ ศิริทวีป	Female	Golden Retriever	8	Mass at 4th left mammary gland	Benign mixed mammary gland tumor	Tumor	Benign
317	2016	P5520250	D16-1689	Canine	ถุงเงิน	คุณรุ่งระวี พิณโนเอก	Female	Poodle	9	Mass at the 4th-5th left mammary gland	Simple carcinoma ( Anaplastic type)	Tumor	Malignant
318	2016	P5520250	D16-1689	Canine	ถุงเงิน	คุณรุ่งระวี พิณโนเอก	Female	Poodle	9	Mass at the 4th-5th right mammary gland	Simple adenocarcinoma	Tumor	Malignant
319	2017	P5730390	D14-355	canine	กุ้ยช่าย	คุณธัญวัตช์ กันต๊ะ	female	shitzu	7	Mass at mammary gland	complex carcinoma	Tumor	Malignant
320	2017	P6008123	D17-1990	Canine	เเบล็ก	คุณพัฒนา นาชัยโชติ	female	Mixed	14	Mass at the mammary gland	Simple carcinoma (Solid pattern, tubulopapillary pattern)	Tumor	Malignant
321	2017	P6009249	D17-2451	Canine	คิม	คุณพรพิมล ปลั่งสมบัติ	female	Mixed	13	Mass at 4th mammary gland	Simple carcinoma (Solid type)	Tumor	Malignant
322	2017	P6008893	D17-2303	Canine	เกมส์	คุณอาจหาญ วุฒิเม	female	Shitzu	9	Mass at 2nd mammary gland	Simple carcinoma (tubulopapillary type)	Tumor	Malignant
323	2017	P6008760	D17-2234	Canine	พิบี้	คุณภาวัต วิชัยณรงค์	female	Siberian Husky	9	Mass at mammary gland	Simple carcinoma (tubulopapillary type)	Tumor	Malignant
324	2017	P5731728	D17-1089	Canine	พลอย	คุณณีราวรรณ์	female	Yorkshire Terrier	7	Mass at 2nd mammary gland	Simple carcinoma (tubulopapillary type)	Tumor	Malignant
325	2017	P5950453	D17-0225	Canine	จีจี้	คุณพลอยณพัชญห์ เปี่ยมบุญ	female	Shitzu	10	Mass at mammary gland	Complex carcinoma	Tumor	Malignant
326	2017	P59101000045	D17-0085	Canine	ปุย	คุณชนกนันท์	Female	Mixed	14	Mass at 5th mammary gland	Simple carcinoma (tubulopapillary type)	Tumor	Malignant
327	2017	P6002554	D17-0152	Canine	แป๊ปซี่	คุณอัจฉราพร ศรีตระกูล	female	Poodle	10	Mass at the left mammary gland	Simple carcinoma (tubulopapillary type)	Tumor	Malignant
328	2017	P6011228	D17-3032	Canine	โป่งเหน่ง	คุณปฏิภาณ ปูรณสกุล	female	Mixed	10	Mass at the mammary gland	Complex carcinoma	Tumor	Malignant
329	2017	P6006924	D17-1536	Canine	อุ๋งอิ๋ง	คุณดารารัตน์ สุนทร	female	Poodle	11	Mass at the mammary gland	Benign mixed mammary gland tumor	Tumor	Benign
330	2017	P6004619	D17-0938	Canine	มูมู่	คุณเฉลิมขวัญ ศิริวรรณา	female	Mixed	9	Mass at mammary gland	Complex carcinoma	Tumor	Malignant
331	2017	P6003336	D17-1551	Canine	ชิชา	คุณเปลวเทียน ไชยวงศ์	female	Mixed	12	Mass at 3th mammary gland	Simple carcinoma (tubulopapillary type)	Tumor	Malignant
332	2017	P6003336	D17-1551	Canine	ชิชา	คุณเปลวเทียน ไชยวงศ์	female	Mixed	12	Mass at 4th mammary gland	Benign mixed mammary gland tumor	Tumor	Benign
333	2017	P6004892	D17-0926	Canine	หมูแฮม	คุณนงนุช เส็นดำ	female	Mixed	9	Mass at the mammary gland	Mixed mammary gland tumor	Tumor	Malignant
334	2017	P6003465	D17-0653	Feline	เบบี้	คุณวนิดา ยาเฟอร์	female	Persian	11	Mass at the mammary gland	Simple carcinoma (tubulopapillary type)	Tumor	Malignant
335	2017	P6003465	D17-0653	Feline	เบบี้	คุณวนิดา ยาเฟอร์	female	Persian	11	Mass at the mammary gland	Simple adenoma	Tumor	Benign
336	2017	P6003526	D17-0552	Feline	อ้วน	คุณธรินทร์ญา เทวภูชม	female	DSH	14	Mass at the mammary gland	Simple carcinoma (tubulopapillary type)	Tumor	Malignant
337	2017	P6012042	D17-3231	Canine	มูมู่	คุณอารีย์ หงส์ประสิทธิ์	female	Pug	10	Mass at the mammary gland	Simple carcinoma (Solid type)	Tumor	Malignant
338	2017	P6007872	D17-1892	Canine	ข้าวเม่า	คุณโอภาศ เกตุรัตน์	female	Mixed	10	Mass at mammary gland	Squamous cell carcinoma (SCC)	Tumor	Malignant
339	2017	P5303917	D17-3021	Canine	น้ำชา	คุณสุธรรม กันคำ	female	Labrador Retriever	7	Mass at 5th right mammary gland	Simple carcinoma (Solid type)	Tumor	Malignant
340	2017	P6002484	D17-0315	Feline	ชีต้า	คุณอุษา แสนวงค์	female	DSH	8 mo	Mammary gland tissue	Feline mammary fibroepithelial hyperplasia	Non-tumor
341	2017	P6007895	D17-2279	Feline	ญาญ่า	คุณรมณ สุขถาวรศิลป์	female	Persian	8 mo	Mass at mammary gland	Simple adenoma	Tumor	Benign
342	2017	P5843375	D17-0015	Canine	ฟักทอง	คุณปริญญาพร อาจสำลิ	female	German sheperd	12	Mass at mammary gland	Simple adenoma with cyst	Tumor	Benign
343	2017	P6005484	D17-1784	Canine	น้ำตาล	คุณสมพร ศรีอักษร	female	Mixed	8	Mass at mammary gland	Fibrosarcoma	Tumor	Malignant
344	2017	P6004074	D17-0708	Canine	แนนซี่	คุณชูวงศ์ สุจริตกุล	female	Jack Russell	9	Mass at mammary gland	Benign mixed mammary gland tumor	Tumor	Benign
345	2017	P5623207	D17-1070	Canine	อุ่นเรือน	คุณสงกรานต์ วงศ์ยวง	female	Poodle	14	Mass at the mammary gland	Osteosarcoma	Tumor	Malignant
346	2017	P6006478	D17-1434	Canine	หมูแดง	คุณวสินธรา แซ่ตั้ง	female	Mixed	7	Mass at mammary gland	Benign mixed mammary gland tumor	Tumor	Benign
347	2017	P6006206	D17-1396	Canine	จู้จี้	คุณอุดมสิน สุจินดา	female	Mixed	6	Mass at mammary gland	Benign mixed mammary gland tumor	Tumor	Benign
348	2017	P6010546	D17-2820	Canine	อีปี้	คุณวัชฎา จันทร์ชัยชนะ	female	Mixed	10	Mass at mammary gland	Simple carcinoma (anaplastic type)	Tumor	Malignant
349	2017	P5901439	D17-0425	Canine	ชบา	คุณทิพยมนต์	female	Miniature Pinscher	12	Mass at mammary gland	Simple carcinoma (Solid type)	Tumor	Malignant
350	2017	P6009382	D17-2478	Canine	เศรษฐี	คุณรัตนา ดวงดี	female	Poodle	12	Mass at mammary gland	Simple carcinoma (anaplastic type)	Tumor	Malignant
351	2017	P6009273	D17-2512	Canine	ไข่ดาว	คุณสุริยา ทาริเดช	female	Shitzu	10	Mass at mammary gland	Simple carcinoma (Solid type)	Tumor	Malignant
352	2017	P5302036	D17-2710	Canine	อาฟูก	คุณชนิสรา ขจรขรรคเพชร	female	Chihuahua	16	Mass at mammary gland	Mammary gland hyperplasia	Non-tumor
353	2017	P5842178	D17-2711	Canine	น้องกล้วยหอม	คุณณัฐวรรณ บุญหมั่น	female	Poodle	11	Mass at mammary gland	Complex carcinoma	Tumor	Malignant
354	2017	P6009124	D17-2759	Canine	เงิน	คุณประทานทิพย์ กระมล	female	Mixed	7	Mass at mammary gland	Simple carcinoma (anaplastic type)	Tumor	Malignant
355	2017	P6010981	D17-2924	Canine	มะลิ	คุณชลธิรศน์ วิริยะรัตนพร	female	Bangkaew	7	Mass at 3th mammary gland	Simple carcinoma (Solid type)	Tumor	Malignant
356	2018	P6116778	D18-1301	Canine	ทีน่า	คุณศิริกาญจน์ วิชัยศิริ	Female	Mixed	10	Mass at mammary gland	Papillary cystic adenocarcinoma with suppurative mastitis	Tumor	Malignant
357	2018	P5902030	CHM370	Feline	มั่งมี	คุณพรพิมล	Female	DSH	8	Mass at mammary gland	Simple tubular carcinoam grade 2	Tumor	Malignant
358	2018	P5901375	CHM125	Canine	ลูกชิ้น	คุณจตุรงค์ เขื่อนคำ	Female	Poodle	8	Mass at mammary gland	Simple tubular adenocarcinoma Grade 2	Tumor	Malignant
359	2018	P5842178	CHM141	Canine	น้องกล้วยหอม	คุณณัฐวรรณ บุญหมั่น	Female	Poodle	12	Mass at mammary gland	Solid carcinoma and anaplastic carcinoma Grade 3	Tumor	Malignant
360	2018	P6114137	CHM126	Feline	Tingerbell		Female	Persian	7	Mass at mammary gland	Simple papillary adenoma	Tumor	Benign
361	2018	P6115533	CHM174	Canine	จิกปิก	คุณเบญจวรรณ	Female	Mixed	15	Mass at mammary gland	Extraskeletal osteosarcoma	Tumor	Malignant
362	2018	P5516944	CHM331	Canine	ปองปอง	คุณภาวิดา จินะเปิงกาศ	Female	Poodle	9	Mass at mammary gland	Benign mixed mammary gland tumor	Tumor	Benign
363	2018	P6117248	CHM480	Canine	ใบเงิน	คุณอรกัญญา	Female	Shitzu	8	Mass at mammary gland	Papillary cystic adenocarcinoma grade 2	Tumor	Malignant
364	2018	P61133195	CHM062	Feline	ตาหวาน	คุณพิชญสินี	Female	DSH	12	Mass at mammary gland	Simple tubulo-papillary adenocarcinoma	Tumor	Malignant
365	2018	P6119046	CHM439	Canine	มอมแมม	คุณนภัสกนก คำใส	Female	Mixed	11	Mass at mammary gland	Simple papillary cystic adenoma	Tumor	Benign
366	2018	P6008725	D18-2025	Canine	น้องเชลซี	คุณวันเพ็ญ สุขใจรังสรรค์	Female	Shitzu	7	Mass at mammary gland	Complex mammary carcinoma	Tumor	Malignant
367	2018	P6113115	D18-0267	Canine	ฟ้าใส	คุณกัญญ์ญัช	Female	Poodle	10	Mass at mammary gland	Simple carcinoma (tubulopapillary pattern)	Tumor	Malignant
368	2018	P6113378	D18-0367	Canine	จังกึม	คุณจิตรัตดา บุญลือ	Female	Poodle	11	Mass at mammary gland	Osteosarcoma	Tumor	Malignant
369	2018	P6113663	D18-0460	Canine	พัตต์	คุณอ้อย คำนวณ	Female	Chihuahua	10	Mass at mammary gland	Mixed mammary gland tumor	Tumor	Malignant
370	2018	P6113802	D18-0492	Canine	แหม่ม	คุณสมคิด เฉียบแหลม	Female	Poodle	11	Mass at mammary gland	Simple carcinoma (tubulopapillary pattern)	Tumor	Malignant
371	2018	P6112369	D18-0511	Canine	มะลิ	คุณอุทัย ฉ่ำบุญรอด	Female	Poodle	12	Mass at mammary gland	Complex carcinoma	Tumor	Malignant
372	2018	P6114103	D18-0573	Canine	ทอง	คุณอมรรัตน์ สร้อยทองเย็น	Female	Golden Retriever	6	Mass at mammary gland	Compex carcinoma	Tumor	Malignant
373	2018	P6114290	D18-0645	Canine	บุ๋มบิ๋ม	คุณพัชรพิมพ์ เชียงใหม่	Female	Poodle	8	Mass at mammary gland	Simple carcinoma (tubulopapillary pattern)	Tumor	Malignant
374	2018	P5521778	D18-2184	Canine	คุกกี้	คุณปิ ลุงจาย	Female	Poodle	7	Mass at mammary gland	Mammary mixed tumor	Tumor	Malignant
375	2018	P6006059	D18-2254	Canine	ถุงทอง	คุณปริมชญาดา อัครเนตร	Female	Mixed	11	Mass at mammary gland	Mammary mixed tumor	Tumor	Malignant
376	2018	P6119671	D18-2519	Canine	ข้าวปั้น	คุณพลับพลึง อุ่นเรือนพงศ์	Female	Poodle	7	Mass at mammary gland	Mammary mixed tumor	Tumor	Malignant
377	2018	P6119594	D18-2560	Canine	มีมี่	คุณดวงเดือน ณ ลำพูน	Female	Poodle	10	Mass at mammary gland	Mammary mixed tumor and complex mammary carcinoma	Tumor	Malignant
378	2018	P6113804	D18-2626	Canine	ครัวซอง	คุณรักษ์พล จันทเลิศ	Female	Cocker Spaniel	14	Mass at mammary gland	Mammary mixed tumor	Tumor	Malignant
379	2018	P6119151	D18-2479	Canine	ลักกี้	คุณสริญญา บุญชูวิทย์	Female	Mixed	7	Mass at mammary gland	Anaplastic carcinoma	Tumor	Malignant
380	2018	P6118743	D18-2175	Feline	ยูยี่	คุณตันติพงษ์ ทองคำ	Female	Persian	10	Mass at mammary gland	Simple carcinoma (tubular type)	Tumor	Malignant
381	2018	P6118751	D18-2172	Feline	สามสี	คุณนุชนาถ สุรพงษ์จินดา	Female	DSH	10	Mass at mammary gland	Solid mammary gland carcinoma	Tumor	Malignant
382	2018	P5841061	D18-1605	Canine	ปุ๊ก	คุณโฉมสุดา หาญศิริชัย	Female	Poodle	12	Mass at mammary gland	Simple carcinoma (Tubulopapillary type)	Tumor	Malignant
383	2018	P61168451	D18-1606	Canine	คุกกี้	คุณภาวีนี มาอาส	Female	Golden Retriever	11	Mass at mammary gland	Simple mammary carcinoma (Tubular type)	Tumor	Malignant
384	2018	P6118106	D18-1849	Canine	หมูแดง	คุณจินตนา โพธิ์แดง	Female	Mixed	16	Mass at mammary gland	Complex carcinoma	Tumor	Malignant
385	2018	P6118289	D18-1929	Canine	หมูแดง	คุณอัญชลี บุญสุข	Female	Shitzu	12	Mass at mammary gland	Simple mammary carcinoma (Papillary type)	Tumor	Malignant
386	2018	P6118289	D18-1929	Canine	หมูแดง	คุณอัญชลี บุญสุข	Female	Shitzu	12	Mass at mammary gland	Simple mammary carcinoma (Tubular type)	Tumor	Malignant
387	2018	P6118289	D18-1929	Canine	หมูแดง	คุณอัญชลี บุญสุข	Female	Shitzu	12	Mass at mammary gland	Solid mammary carcinoma	Tumor	Malignant
388	2018	P61118386	D18-1957	Canine	สเปค	คุณมยุรี จารวัสตร์	Female	Mixed	10	Mass at mammary gland	Anaplastic carcinoma	Tumor	Malignant
389	2018	P5841061	D18-2024	Canine	ปุ๊ก	คุณโฉมสุดา หาญศิริชัย	Female	Poodle	12	Mass at mammary gland	Simple carcinoma (Tubulopapillary type)	Tumor	Malignant
390	2018	P6118774	D18-2104	Canine	เตียนหอม	คุณชาลิศา วงศ์ไหม	Female	Shitzu	13	Mass at mammary gland	Mammary mixed tumor	Tumor	Malignant
391	2018	P5628625	D18-0747	Canine	ปาร์ตี้	คุณวรพล ชัยศรี	Female	Shitzu	5	Mass at mammary gland	Complex carcinoma	Tumor	Malignant
392	2018	P6114703	D18-0788	Canine	ยูริโกะ	คุณศศิธร สุขตาวุธ	Female	Chihuahua	10	Mass at mammary gland	Complex carcinoma	Tumor	Malignant
393	2018	P6119821	D18-0903	Canine	แองเจิ้ล	คุณมาโนส กล่ำแสง	Female	American Pitbull	10	Mass at mammary gland	Anaplastic carcinoma	Tumor	Malignant
394	2018	P6115534	D18-0953	Canine	สนิม	คุณรัชนู อุปพันธ์	Female	Mixed	8	Mass at mammary gland	Anaplastic carcinoma	Tumor	Malignant
395	2018	P6115673	D18-0987	Canine	บูบู้	คุณวิทยา สุวรรณนำ	Female	Mixed	8	Mass at mammary gland	Mammary mixed tumor	Tumor	Malignant
396	2018	P6114699	D18-0989	Canine	เหมย	คุณภัคนุช ปันสิทธิ์	Female	Mixed	10	Mass at mammary gland	Complex adenoma	Tumor	Benign
397	2018	P5842178	D18-1044	Canine	น้องกล้วยหอม	คุณสมาน สร้อยสม	Female	Poodle	12	Mass at mammary gland	Complex carcinoma	Tumor	Malignant
398	2018	P6121242	D18-3129	Canine	โค้ก	คุณเสาวนิตย์ ศิริพงษ์	Female	Daschund	11	Mass at mammary gland	Complex carcinoma	Tumor	Malignant
399	2018	P6114669	D18-0789	Canine	เหมย	คุณภัคนุช ปันสิทธิ์	Female	Mixed	11	Mass at mammary gland	Simple carcinoma (tubular type)	Tumor	Malignant
400	2018	P5842178	D18-1044	Canine	น้องกล้วยหอม	คุณณัฐวรรณ บุญหมั่น	Female	Poodle	12	Mass at mammary gland	Complex carcinoma	Tumor	Malignant
401	2018	P6116147	D18-1095	Canine	วันดี	คุณฉวีวรรณ พรหมสุวรรณ์	Female	Mixed	7	Mass at mammary gland	Solid carcinoma	Tumor	Malignant
402	2018	P6116401	D18-1099	Canine	บุ๋ย	คุณณัฐวรรณ บุญหมั่น	Female	Mixed	13	Mass at mammary gland	Fibroadenoma	Tumor	Benign
403	2018	P6416370	D18-1219	Canine	วินดี้	คุณชณิชา จินาการ	Female	Golden Retriever	9	Mass at mammary gland	Simple mammary adenoma	Tumor	Benign
404	2019	P5902030	D19-1601	Feline	มั่งมี	คุณนิรมล จินะชิตตรา	Female	DSH	9	Mass at mammary gland	Tubular carcinoma	Tumor	Malignant
405	2019	P6225636	D19-1550	Canine	แบมแบม	คุณวรัญญา เอื้อตระกูล	Female	Beagle	11	Mass at mammary gland	Tubular carcinoma	Tumor	Malignant
406	2019	P6227084	D19-2154	Canine	โคโค่	คุณสุธิชา สุขรัตน์	Male	Mixed	1	Mass at mammary gland	Complex adenoma	Tumor	Benign
407	2019	P6007062	D19-0300	Canine	แฮปปี้	คุณวาสินี โอโกชิ	Female	Dachshund	11	Mass at mammary gland	Benign mixed tumor	Tumor	Benign
408	2019	P6113804	D19-0323	Canine	ครัวซอง	คุณรักษ์พล จันทเลิศ	Female	Mixed	14	Mass at mammary gland	Solid mammary gland carcinoma	Tumor	Malignant
409	2019	P6121574	CHM10	Canine	บุญหลง	คุณพิทักษ์	Female	Cocker Spaniel	10	Mass at mammary gland	Complex adenocarcinoma	Tumor	Malignant
410	2019	P5948799	D19-0072	Canine	โทนี่	คุณดารัณ สิกวานิช	Female	Miniature Pinscher	12	Mass at mammary gland	Solid mammary gland carcinoma	Tumor	Malignant
411	2019	P6222520	D19-0255	Canine	Beth	คุณ Charles William	Female	Alaskan Malamute	9	Mass at mammary gland	Mammary mixed tumor grade 2	Tumor	Malignant
412	2019	P6121632	D19-0416	Feline	ขาวขาว	คุณรัชพล แซ่ลิ้ม	Female	DSH	10	Mass at mammary gland	Simple mammary carcinoma (Tubular type)	Tumor	Malignant
413	2019	P6223021	D19-0482	Canine	ซูซาน	คุณศศิธร สุขิตาวุธ	Female	Chihuahua	9	Mass at mammary gland	Complex carcinoma	Tumor	Malignant
414	2019	P6224188	D19-0904	Canine	พุงพลุ้ย	คุณหนึ่งฤทัย	Female	Shitzu	10	Mass at mammary gland	Solid carcinoma	Tumor	Malignant
415	2019	P5305218	D19-1381	Canine	เฉาก๊วย	คุณเพ็ญศรี สามคำ	Female	Mixed	8	Mass at mammary gland	Comedocarcinoma	Tumor	Malignant
416	2019	P6225149	D19-1271	Canine	บี	คุณเจษฎาดล ทาน้อย	Female	Chihuahua	14	Mass at mammary gland	Simple mammary carcinoma (Cystic papillary type)	Tumor	Malignant
417	2019	P6225051	D19-1273	Canine	กุ๊ชชี่	คุณพิชญามนฑ์ แก่นจันทร์วงศ์	Female	Poodle	12	Mass at mammary gland	Fibroadenoma	Tumor	Benign
418	2019	P6224811	D19-1162	Canine	ปุ๊กกี้	คุณสุวินัย ชัยปัญญา	Female	Poodle	10	Mass at mammary gland	Complex adenoma	Tumor	Benign
419	2019	P6226185	D19-1706	Feline	กาฟิลด์	คุณอรณัชชา ชะนะหัง	Female	DSH	8	Mass at mammary gland	Cribiform carcinoma	Tumor	Malignant
420	2019	P6222705	D19-1142	Canine	ลาเต้	คุณสรินยา เรืองเวช	Female	Shitzu	9	Mass at mammary gland	Complex carcinoma	Tumor	Malignant
421	2019	P6224843	D19-1163	Canine	คุ้กกี้	คุณฟองแก้ว บุญชัน	Female	Mixed	13	Mass at mammary gland	Complex carcinoma	Tumor	Malignant
422	2019	P6223527	D19-1686	Feline	ชมพู่	คุณลำปลายมาศ ต่างพันธุ์	Female	Persian	2	Mass at mammary gland	Comedocarcinoma	Tumor	Malignant
423	2019	P6225619	D19-1495	Canine	กาแฟ	คุณคลีนรา ทองคำ	Female	Mixed	10	Mass at mammary gland	Anaplastic carcinoma	Tumor	Malignant
424	2019	P6226171	CHM333	Canine	สไปรท์	คุณพิสิษฐ์	Female	Mixed	3	Mass at mammary gland	Papillary adenocarcinoma	Tumor	Malignant
425	2019	P6227241	CHM384	Canine	โปรเจค	คุณศิริพร	Female	Pomeranian	4	Mass at mammary gland	Solid carcinoma	Tumor	Malignant
426	2019	P6225346	CHM285	Feline	โมง	คุณวิลาวรรณ	Female	DSH	5	Mass at mammary gland	Simple tubular adenocarcinoma, grade 2	Tumor	Malignant
427	2019	P6225211	CHM235	Canine	ส้มโอ	คุณจินตนา	Female	Mixed	5	Mass at mammary gland	Benign mixed mammary tumor	Tumor	Benign
428	2019	P6223410	CHM234	Canine	หมูน้อย	คุณอัมพร	Female	Shitzu	3	Mass at mammary gland	Simple papillary and ductal adenocarcinoma, grade 1	Tumor	Malignant
429	2019	P6225383	CHM268	Canine	สีขาว	คุณธวัชชัย	Female	Mixed	10	Mass at mammary gland	Anaplastic carcinoma	Tumor	Malignant
430	2019	P5628666	CHM149	Canine	ข้าวแตน	คุณนสินี	Female	Mixed	12	Mass at mammary gland	Benign mixed mammary tumor	Tumor	Benign
431	2019	P6119547	CHM326	Canine	ขำขำ	คุณประภาศรี	Female	Pomeranian	6	Mass at mammary gland	Benign mixed tumor	Tumor	Benign
432	2019	P6121580	CHM24	Canine	กุ้งกิ้ง		Female	Mixed	11	Mass at mammary gland	Simple tubular adenocarcinoma, grade 1	Tumor	Malignant
433	2019	P6121595	CHM3	Canine	กีต้า	คุณพวงชมพู	Female	Siberian Husky	8	Mass at mammary gland	Solid carcinoma, grade 3	Tumor	Malignant
434	2019	P6223591	CHM122	Canine	แบมแบม		Female	Mixed	11	Mass at mammary gland	Simple tubular adenocarcinoma, grade 2	Tumor	Malignant
435	2019	P6223629	CHM127/1	Canine	พูลทรัพย์1	คุณประเวท	Female	Mixed	15	Mass at mammary gland	Simple tubular adenocarcinoma, grade 2	Tumor	Malignant
436	2019	P6224466	CHM176	Canine	ดำ	คุณฟองอินทร์	Female	Mixed		Mass at mammary gland	Anaplastic carcinoma	Tumor	Malignant
437	2019	P6120816	CHM46	Canine	หมูตุ๋น		Female	Shitzu	11	Mass at mammary gland	Simple tubular adenocarcinoma	Tumor	Malignant
438	2019	P6227909	CHM12	Canine	มะเขือ	คุณเดชา	Female	Beagle	10	Mass at mammary gland	Invasive tubular adenocarcinoma, grade 2	Tumor	Malignant
439	2019	P6224489	D19-1063	Canine	เฮเลน	คุณศศิธร สุขิตาวุธ	Female	Chihuahua	9	Mass at mammary gland	Solid carcinoma	Tumor	Malignant
440	2019	P6222712	D19-0352	Canine	บุ้งกี๋	คุณทิพย์วรรณ มณีไกรสอน	Female	Beagle	11	Mass at mammary gland	Mammary mixed tumor	Tumor	Malignant
441	2019	P6223527	D19-0685	Feline	ชมพู่	คุณลำปลายมาศ ต่างพันธุ์	Female	DSH	2	Mass at mammary gland	Simple mammary carcinoma (Tubular type)	Tumor	Malignant
442	2019	P6223866	D19-0802	Feline	ขาว	คุณศราวุธ ติ๊บแก้ว	Female	DSH	7	Mass at mammary gland	Solid carcinoma	Tumor	Malignant
443	2019	P6223702	D19-0726	Canine	สไปรท์	คุณณน่าน เจริญสือสกุล	Female	French Bulldog	5	Mass at mammary gland	Mammary mixed tumor	Tumor	Malignant
444	2019	P6222930	D19-0547	Feline	เหมียว	คุณดวงเดือน คำภิคำ	Female	DSH	13	Mass at mammary gland	Intraductal papillary adenoma	Tumor	Benign
445	2019	P6223071	D19-0655	Feline	แห้ง	คุณสำราญ มูลลา	Female	DSH	7	Mass at mammary gland	Simple carcinoma (tubular type)	Tumor	Malignant

## Sheet: Privot r (remove repeat HN)
Animal	Feline
Type of tumor	Malignant
ป้ายชื่อแถว	นับจำนวน ของ No.
1	1
2	1
5	1
6	1
7	2
8	4
9	2
10	6
11	2
12	3
13	1
14	1
16	2
ผลรวมทั้งหมด	27

## Sheet: Raw data (remove repeat HN)
No.	Year	HN	Case No	Animal	Pateint name	Owner name	Sex	Breed	Age	Location	Diagnosis	Type of biopsy	Type of tumor
1	2012	P5517934	D12-375	canine	จินนี่	คุณเยาวนา	Female	Shitzu	9	Mass at mammary gland	Simple carcinoma (Solid type)	Tumor	Malignant
2	2012	P5517872	D12-392	canine	นิล	คุณศรัณยู รองมาลี	Female	Mixed	4	Mass at mammary gland	Simple carcinoma (Anaplastic type)	Tumor	Malignant
3	2012	P5517901	D12-376	canine	อุ้ยอ้าย	คุณสวรรค์ บุณพน	Female	Poodle	11	Mass at mammary gland	Simple carcinoma (Solid type)	Tumor	Malignant
4	2012	P5517625	D12-339	canine	Snow white	คุณวิชญ์ เชยะกุล	Female	Poodle	9	Mass at mammary gland	Tubulopapillary carcinoma	Tumor	Malignant
5	2012	P5410965	D12-309	canine	ซินดี้	คุณอัจฉราพรรณ กาจสกุล	Female	Dalmecian	13	Mass at mammary gland	Tubulopapillary carcinoma	Tumor	Malignant
6	2012	P5517515	D12-268	canine	ตัวเล็ก	คุณณิชชรีย์ จำปา	Female	Poodle	8	Mass at mammary gland	Simple carcinoma (Anaplastic type)	Tumor	Malignant
7	2012	P5517627	D12-281	canine	เจนนี่	คุณอิศรพงศ์ สิทธิยศ	Female	Poodle	10	Mass at mammary gland	Solid carcinoma	Tumor	Malignant
8	2012	P5517230	D12-233	canine	มอมเเมม	คุณยุพา ชุ่มจิตต์	Female	Mixed	10	Mass at mammary gland	Complex tubular adenocarcinoma	Tumor	Malignant
9	2012	P5517123	D12-234	canine	ดุ๊กดิ๊ก	คุณเจตน์ สิงหลักษณ์	Female	Shitzu	10	Mass at mammary gland	Malignant mixed tumor	Tumor	Malignant
10	2012	P5517136	D12-199	canine	ถุงทอง	คุณพนิดา มูลกำเนิด	Female	Mixed	9	Mass at mammary gland	Complex carcinoma	Tumor	Malignant
11	2012	P5516612	D12-065	canine	เชอร์รี่	คุณรินทร์ลภัส	Female	Poodle	11	Mass at mammary gland	Complex carcinoma	Tumor	Malignant
12	2012	P5517038	D12-181	canine	ข้าวโพด	คุณเอกชัย คำอุดหนุน	Female	Mixed	8	Mass at mammary gland	Malignant mixed tumor	Tumor	Malignant
13	2012	P5516553	D12-066	canine	ไอติม	คุณสุภาณี นันต๊ะ	Female	Mixed	12	Mass at mammary gland	Tubulopapillary carcinoma	Tumor	Malignant
14	2012	P5516970	D12-156	canine	เบิร์ดเดย์	คุณนวพร นาคจู	Female	Mixed	8	Mass at mammary gland	Malignant mixed tumor	Tumor	Malignant
15	2012	P5516978	D12-157	canine	เลี่ยม	คุณสิริพร ณ เชียงใหม่	Female	Mixed	10	Mass at mammary gland	Tubulopapillary carcinoma	Tumor	Malignant
16	2012	P5516931	D12-153	canine	ซาร่า	คุณบุญรัตน์ รัตนเจริญมิตร	Female	Mixed	6	Mass at mammary gland	Solid carcinoma	Tumor	Malignant
17	2012	P5516547	D12-046	canine	เคา	คุณรุ่งอรุณ เเซ่ก๊วย	Female	Mixed	15	Mass at mammary gland	Solid carcinoma	Tumor	Malignant
18	2012	P5413065	D12-025	canine	มีมี่	คุณบุญนำ เอิ้นทะไชย	Female	Mixed	14	Mass at mammary gland	Solid carcinoma	Tumor	Malignant
19	2012	P5413186	D12-047	canine	เฉาก๊วย	คุณศรัญญา อย่างสุโขทัย	Female	Mixed	5	Mass at mammary gland	Complex solid carcinoma	Tumor	Malignant
20	2012	P5416295	D12-016	canine	มอมเเมม	คุณอุษณีย์ เงินกระโทก	Female	Mixed	17	Mass at mammary gland	Solid carcinoma	Tumor	Malignant
21	2012	P5519574	D12-776	canine	พองโก้	คุณเฉลียว จิตต์นาน	Female	Poodle	15	Mass at mammary gland	Simple carcinoma (Anaplastic type)	Tumor	Malignant
22	2012	P5519667	D12-812	canine	เเอนนา	คุณนันทพิสิฐ์ ฤทัยนันทะกาญจน์	Female	Cocker Spaniel	8	Mass at mammary gland	Simple carcinoma (Solid type)	Tumor	Malignant
23	2012	P5519346	D12-747	canine	เเบงค์	คุณภูษณิศา ดอกพงษ์กลาง	Male	Mixed	7	Mass at mammary gland	Simple carcinoma (Anaplastic type)	Tumor	Malignant
24	2012	P5519306	D12-710	canine	ซูกัส	คุณสาคร	Female	Poodle	8	Mass at mammary gland	Malignant mixed tumor	Tumor	Malignant
25	2012	P5519326	D12-694	canine	พุดดิ้ง	คุณสุรางค์รััตน์ ณ ลำปาง	Female	Mixed	12	Mass at mammary gland	Tubulopapillary carcinoma	Tumor	Malignant
26	2012	P5519189	D12-680	canine	โรบิน	คุณเจตศรันย์ สุวรรณธานี	Female	Miniature Pinscher	8	Mass at mammary gland	Solid carcinoma	Tumor	Malignant
27	2012	P5518864	D12-610	canine	นิกกี้	คุณยงยุทธ ผลาผล	Male	Mixed	5	Mass at mammary gland	Benign mixed tumor	Tumor	Benign
28	2012	P5519144	D12-652	canine	ข้าวจ้าว	คุณจุฑามาศ ชอบเเสงจันทร์	Female	Cocker Spaniel	8	Mass at mammary gland	Solid carcinoma	Tumor	Malignant
29	2012	P5518267	D12-506	canine	เเบมเเบม	คุณธวัช เททิพย์	Female	Poodle	7	Mass at mammary gland	Mucinous carcinoma	Tumor	Malignant
30	2012	P5306803	D12-484	canine	ยุ่ง	คุณคเชนทร์ พงศ์ทวีกาญจน์	Female	Mixed	7	Mass at mammary gland	Complex carcinoma	Tumor	Malignant
31	2012	P5518228	D12-446	canine	กีวี่	คุณยุคล นิมมานเหมินทร์	Female	Poodle	10	Mass at mammary gland	Complex carcinoma	Tumor	Malignant
32	2012	P5518232	D12-445	canine	ขี้มูก	คุณพะยอม มะโนจิต	Female	Rottweiler	7	Mass at mammary gland	Simple carcinoma (Anaplastic type)	Tumor	Malignant
33	2012	P5518124	D12-420	canine	แบล็ก	คุณวิชัย โอรัตนสถาพร	Female	Miniature Pinscher	10	Mass at mammary gland	Malignant mixed tumor	Tumor	Malignant
34	2012	P5522778	D12-1644	canine	ไข่เจียว	คุณวรัชยา ลำนวล	Female	Mixed	9	Mass at mammary gland	Tubulopapillary carcinoma	Tumor	Malignant
35	2012	P5521271	D12-1567	canine	โบโบ้	คุณพนิตนาฎ นันทขว้าง	Female	Mixed	8	Mass at mammary gland	Malignant mixed tumor	Tumor	Malignant
36	2012	P5522253	D12-1510	canine	ชีต้า	คุณกรรณิการ์ อินทรากอง	Female	Mixed	9	Mass at mammary gland	Tubulopapillary carcinoma	Tumor	Malignant
37	2012	P5521848	D12-1441	canine	ข้าวนึ่ง	คุณอุดม ไชยพรม	Female	Mixed	10	Mass at mammary gland	Adenosis with infiltrating carcinoma	Tumor	Malignant
38	2012	P5522233	D12-1506	canine	โคล่า	คุณสมพงษ์ ปัญญาสุข	Female	Mixed	10	Mass at mammary gland	Malignant mixed tumor	Tumor	Malignant
39	2012	P5521474	D12-1438	Feline	เเต้ม	คุณสุคนธ์ จันทวงศ์	Female	DSH	8	Mass at mammary gland	Solid carcinoma	Tumor	Malignant
40	2012	P5412640	D12-1199	Feline	สามสี	คุณอุทุมพร ธารากุล	Female	DSH	10	Mass at mammary gland	Simple carcinoma (Solid carcinoma)	Tumor	Malignant
41	2011	P5516460	D12-026	canine	บี้	พระครูปลัดสิทธิวัฒน	Female	Mixed	10	Mass at mammary gland	Malignant mixed tumor	Tumor	Malignant
42	2012	P5521253	D12-1246	Feline	เหมียว	คุณบัวเพ็ชร ชัยชนะ	Female	DSH	12	Mass at mammary gland	Tubulopapillary carcinoma	Tumor	Malignant
43	2012	P5521278	D12-1247	canine	เด็ก	คุณศิริพร ใจกว้าง	Female	Mixed	12	Mass at mammary gland	Benign mixed mammary gland tumor	Tumor	Benign
44	2012	P5301473	D12-1226	canine	ดุ๊กดิ๊ก	คุณศรัญญา มงคลสิทธิ์	Female	Miniature Pinscher	10	Mass at mammary gland	Simple carcinoma (Solid carcinoma)	Tumor	Malignant
45	2012	P5521114	D12-1201	canine	ท๊อฟฟี่	คุณรัตติกาล กองกิจ	Female	Poodle	7	Mass at mammary gland	Malignant mixed tumor	Tumor	Malignant
46	2012	P5518164	D12-1117	canine	เหมียวๆ	คุณชลิดา หน่อชาย	Female	Mixed	8	Mass at mammary gland	Simple carcinoma (Anaplastic type)	Tumor	Malignant
47	2012	P5521023	D12-1154	canine	หมี	คุณชฎาพร เต็มดี	Female	Mixed	12	Mass at mammary gland	Simple carcinoma (Anaplastic type)	Tumor	Malignant
48	2012	P5307582	D12-1000	Feline	Maxi	คุณ Peter Apfelbdum	Female	DSH	16	Mass at mammary gland	Tubulopapillary carcinoma	Tumor	Malignant
49	2012	P5520956	D12-1130	canine	น้องพลอยสวย	คุณเบญจมาศ เป็งสุวรรณ	Female	Mixed	7	Mass at mammary gland	Mammary gland cystadenoma	Tumor	Benign
50	2012	P5520868	D12-1132	canine	สอง	คุณศุภชัย พิพิธสมบัติ	Female	Mixed	5	Mass at mammary gland	Carcinosarcoma	Tumor	Malignant
51	2012	P5520933	D12-1133	canine	ดิ๋ง	คุณสมฤดี ทองอุปการ	Female	Mixed	11	Mass at mammary gland	Simple carcinoma (Anaplastic type)	Tumor	Malignant
52	2012	P5518878	D12-1131	canine	แอนนี่	คุณศิลป์ชัย หัสจุมพล	Female	Golden Retriever	10	Mass at mammary gland	Malignant mixed mammary gland	Tumor	Malignant
53	2012	P5520505	D12-1007	canine	Pixxy	คุณเพิร์ล วัฒนากุล	Female	Bangkaew	10	Mass at mammary gland	Tubulopapillary carcinoma	Tumor	Malignant
54	2012	P5520453	D12-989	canine	พอลลี่	คุณรนนท์ ดวงเเก้วธนพร	Female	Golden Retriever	9	Mass at mammary gland	Fibrosarcoma	Tumor	Malignant
55	2012	P5518018	D12-905	canine	เตี้ย	คุณทองอิน จิตรมงคล	Female	Mixed	6	Mass at mammary gland	Tubulopapillary carcinoma	Tumor	Malignant
56	2012	P5520187	D12-947	canine	สตางค์	คุณบุปผา ทับทิมเเดง	Female	mixed	10	Mass at mammary gland	Tubulopapillary carcinoma	Tumor	Malignant
57	2012	P5521947	D12-1474	Feline	อุ๋ยอุ๋ย	คุณเบญจมาศ พงศ์อ้าย	Female	DSH	5	Mammary tissue	Fibroadenomatous change	Non-tumor
58	2013	p5628715	D13-1674	canine	ลีออง	คุณนิดา ศิริทรัพย์	Female	Beagle	5	Mass at mammary gland	Mammary gland adenoma	Tumor	Benign
59	2013	P5628531	D13-1622	canine	นางปุย	คุณ สนอง เเสงจันทร์	Female	Mixed	9	Mass at mammary gland	Simple carcinoma	Tumor	Malignant
60	2013	P5300536	D13-2665	canine	ฟาราห์	คุณ เรียม ชัยสวัสดิ์	Female	Poodle	16	Mass at mammary gland	Simple carcinoma (Solid carcinoma)	Tumor	Malignant
61	2013	P5302009	D13-1688	canine	นิต้า	คุณ ชัยรัตน์ ทัศนชน	Female	Poodle	10	Mass at mammary gland	Malignant mixed tumor	Tumor	Malignant
62	2013	P5627854	D13-1437	canine	มีมี่	คุณ สุชาติ นนท์ปัญญา	Female	mixed	9	Mass at mammary gland	Malignant mixed tumor	Tumor	Malignant
63	2013	P5628240	D13-1501	Feline	ไพลิน	คุณ พิมพ์ใจ ดวงสอาด	Female	DSH	9	Mass at mammary gland	Simple carcinoma (Solid type)	Tumor	Malignant
64	2013	P5625578	D13-1755	canine	ปุยฝ้าย	คุณ เเสงหล้า เฮือนงาม	Female	Poodle	10	Mass at mammary gland	Simple carcinoma (Tubulopapillary carcinoma)	Tumor	Malignant
65	2013	P5623477	D13-117	canine	เหมย	คุณ เครือวัลย์ โกมลสุบิน	Female	Mixed	10	Mass at mammary gland	Tubulopapillary carcinoma	Tumor	Malignant
66	2013	P5623459	D13-158	canine	บิวตี้	คุณอำนวย ชิดทอง	Female	mixed	9	Mass at mammary gland	Low-cellularity fibroadenoma	Tumor	Benign
67	2013	P5518659	D13-157	canine	มิมิ	คุณณิชญา จิโน	Female	Poodle	11	Mass at mammary gland	complex carcinoma	Tumor	Malignant
68	2013	P5520216	D13-185	canine	เยลลี่	คุณญานิน วงศ์ใหญ่	Female	Golden Retriever	10	Mass at mammary gland	malignant mixed mammary glant tumor	Tumor	Malignant
69	2013	P5623728	D13-193	Feline	ตัวเล็ก	คุณอโนทัย ชาญเวช	Female	DSH	11	Mass at mammary gland	Tubulopapillary carcinoma	Tumor	Malignant
70	2013	P5627591	D13-1359	canine	ชมพู่	คุณยุคุณธร ชุมกลัด	Female	Poodle	13	Mass at mammary gland	Tubulopapillary carcinoma	Tumor	Malignant
71	2013	P5628409	D13-1598	canine	ดุ๊กดิ๊ก	คุณจินต์ บุญยะ	Female	mixed	15	Mass at mammary gland	Simple carcinoma (Solid type)	Tumor	Malignant
72	2013	P5625399	D13-650	canine	ยู่ยี่	คุณฉัตฤดี ขันธิยะ	Female	mixed	12	Mass at mammary gland	Solid carcinoma	Tumor	Malignant
73	2013	P5519797	D13-536	canine	บะหมี่	คุณพัดชา ปินทะดิษ	Female	mixed	10	Mass at mammary gland	Solid carcinoma	Tumor	Malignant
74	2013	P5625458	D13-695	canine	ชิบิ	คุณสุชาดา เเดวงไสว	Female	mixed	4	Mass at mammary gland	Mucinous adenocarcinoma	Tumor	Malignant
75	2013	P5625395	D13-693	canine	ตะนอย	คุณสุทธิพันธ์ ถนอมพันธ์	Female	Pekingese	11	Mass at mammary gland	complex carcinoma	Tumor	Malignant
76	2013	P5625366	D13-709	canine	เเจม	คุณดวงกร วิเศษดำรง	Female	Mixed	4	Mass at mammary gland	Simple carcinoma (Solid carcinoma)	Tumor	Malignant
77	2013	P5624960	D13-545	canine	จุ้นจ้าน	คุณพีรพงษ์ เพ็ชร	Female	mixed	10	Mass at mammary gland	complex carcinoma	Tumor	Malignant
78	2013	P5625459	D13-696	canine	กาแฟ	คุณอังคณา วงษา	Female	mixed	5	Mass at mammary gland	Simple carcinoma (Anaplastic type)	Tumor	Malignant
79	2013	P5522620	D13-001	canine	จิ๋ว	คุณสุดารัตน์ จันทรวงศ์	Female	mixed	7	Mass at mammary gland	Mixed mammary gland tumor	Tumor	Malignant
80	2013	P5302289	D13-015	canine	สตัง	คุณบังอร สายวา	Female	mixed	15	Mass at mammary gland	Anaplastic carcinoma	Tumor	Malignant
81	2013	P5623391	D13-091	canine	กล้วยไข่	คุณพัชราวลัย เอี่ยมรัศมี	Female	mixed	10	Mass at mammary gland	Solid carcinoma	Tumor	Malignant
82	2013	P5623238	D13-055	canine	ลำดวน	คุณธีรา สุขสวัสดิ์ ณ อยุธยา	Female	Cocker Spaniel	9	Mass at mammary gland	Mixed mammary gland tumor	Tumor	Malignant
83	2013	P5623445	D13-113	canine	เข็มทอง	คุณเบญจพร หอมจิตต์	Female	mixed	10	Mass at mammary gland	Fibrosarcoma	Tumor	Malignant
84	2013	P5623354	D13-077	canine	นิล	คุณวิไลลักษณ์ วอร์เเร็กซ์	Female	mixed	10	Mass at mammary gland	Anaplastic carcinoma	Tumor	Malignant
85	2013	P5626380	D13-991	canine	ปีโป้	คุณดวงเดือน ชายวัง	Female	mixed	10	Mass at mammary gland	complex carcinoma	Tumor	Malignant
86	2013	P5626331	D13-957	canine	โอรีโอ้	คุณกณัฐณา รณิตชยกุล	Female	Labrador Retriever	9	Mass at mammary gland	Tubulopapillary carcinoma	Tumor	Malignant
87	2013	P5623995	D13-1037	canine	สีสวาท	คุณชนัตถ์ สุทธวรรณ	Female	Chihuahua	14	Mass at mammary gland	complex carcinoma	Tumor	Malignant
88	2013	P5626793	D13-1095	canine	น้องใหม่	คุณวนาพิศ นันทพันธ์	Female	mixed	6	Mass at mammary gland	Simple carcinoma	Tumor	Malignant
89	2013	P5626236	D13-927	canine	ไวท์	คุณชลิดา	Female	mixed	6	Mass at mammary gland	Malignant mixed tumor	Tumor	Malignant
90	2013	P5626830	D13-1122	canine	จูเนียร์	คุณเลขา จาวจา	Female	Poodle	8	Mass at mammary gland	Malignant mixed tumor	Tumor	Malignant
91	2013	P5626895	D13-1132	canine	เอมมิลี	คุณทิพย์สุดา ดูสว่าง	Female	Beagle	8	Mass at mammary gland	Mammary gland adenocarcinoma	Tumor	Malignant
92	2013	P5626925	D13-1133	canine	เลน	คุณกนกวรรณ ช่างสุพรรณ	Female	Mixed	14	Mass at mammary gland	fibrosarcoma	Tumor	Malignant
93	2013	P5624378	D13-368	canine	ขี้เหร่	คุณณัฐวี พรหมวังศรี	Female	mixed	10	Mass at mammary gland	Mixed mammary gland tumor	Tumor	Malignant
94	2013	P5624442	D13-412	canine	สดใส	คุณอริยาภัณฑ์ ศรีวิลัย	Female	pug	7	Mass at mammary gland	Tubulopapillary carcinoma	Tumor	Malignant
95	2013	P5624245	D13-318	canine	ซินดี้	คุณฟองจันทร์ จินาทิพย์	Female	mixed	11	Mass at mammary gland	complex carcinoma	Tumor	Malignant
96	2013	P5624724	D13-487	canine	จีน่า	คุณเอื้อมพร	Female	Poodle	10	Mass at mammary gland	Tubulopapillary carcinoma	Tumor	Malignant
97	2013	P5410982	D13-416	canine	ฟักทอง	คุณสุจิรา อมรสุวรรณ	Female	shitzu	11	Mass at mammary gland	Squamous cell metaplasia of mammary gland	Tumor	Benign
98	2013	P5410609	D13-574	Feline	แตงโม	คุณอมาพร ใจห้าว	Female	DSH	13	Mass at mammary gland	Solid carcinoma	Tumor	Malignant
99	2013	P5624992	D13-552	canine	เนเน่	คุณอรุณี เผ่าพงษ์	Female	Poodle	9	Mass at mammary gland	malignant mixed mammary glant tumor	Tumor	Malignant
100	2013	P5412732	D13-546	canine	จ๊อบเเจ๊บ	คุณกมลวรรณ จันทร์วงษ์	Female	Poodle	9	Mass at mammary gland	Tubulopapillary carcinoma	Tumor	Malignant
101	2013	P5410759	D13-601	canine	บีโธเฟ่น	คุณอำนวย ชิดทอง	Female	mixed	13	Mass at mammary gland	complex carcinoma	Tumor	Malignant
102	2013	P5303103	D13-474	canine	เเดง	คุณพร เเก่นเมือง	Female	mixed	13	Mass at mammary gland	Solid carcinoma	Tumor	Malignant
103	2013	P5627914	D13-1406	canine	โอเลี้ยง	คุณณัฐฑิมล คำทิพย์	Female	Poodle	7	Mass at mammary gland	Benign mixed tumor	Tumor	Benign
104	2013	P5626055	D13-850	canine	จิ่งหง	คุณจิราพร กิตติคุณชัย	Female	Poodle	10	Mass at mammary gland	Solid carcinoma (Complex type)	Tumor	Malignant
105	2013	P5626002	D13-845	canine	จุ๊บจิ๊บ	คุณเเสงจันทร์ นันทขว้าง	Female	mixed	8	Mass at mammary gland	Tubulopapillary carcinoma	Tumor	Malignant
106	2013	P5625264	D13-751	canine	ลำไย	คุณจารุวรรณ จันทร์สุวรรณ	Female	Poodle	16	Mass at mammary gland	Simple carcinoma (Solid carcinoma)	Tumor	Malignant
107	2013	P5626066	D13-860	canine	หมูหยอง	คุณสุดารัตน์ คุ้มเเคว้น	Female	Poodle	10	Mass at mammary gland	Osteosarcoma	Tumor	Malignant
108	2013	P5626068	D13-857	canine	ตูมตาม	คุณชัยยะ วงศ์ตระกูลเล็ก	Female	mixed	9	Mass at mammary gland	Simple carcinoma (Anaplastic type)	Tumor	Malignant
109	2013	P5625743	D13-783	canine	โอโม่	คุณบุณยวีร์ ทนทาน	Female	Mixed	10	Mass at mammary gland	Squamous cell carcinoma	Tumor	Malignant
110	2013	P5627112	D13-1195	Feline	เเม้ว	คุณยุพิน กิติยศ	Female	DSH	8	Mass at mammary gland	Tubulopapillary carcinoma	Tumor	Malignant
111	2013	P5307245	D13-1202	canine	เจี้ยว	คุณประเสริฐ บุญเรือง	Female	mixed	10	Mass at mammary gland	Malignant mixed tumor	Tumor	Malignant
112	2013	P5627214	D13-1227	canine	เจสซี่	คุณชาติชาย พรหมมั่ง	Female	Golden Retriever	11	Mass at mammary gland	Tubulopapillary carcinoma	Tumor	Malignant
113	2013	P5522111	D13-1199	canine	ลักกี้	คุณลัดดาวรรณ	Female	Labrador Retriever	4	Mass at mammary gland	Benign mixed tumor	Tumor	Benign
114	2013	P5628065	D13-1453	canine	Donut	คุณปราจีน ประเสริฐสังข์	Female	mixed	14	Mass at mammary gland	Simple carcinoma (Anaplastic type)	Tumor	Malignant
115	2013	P5627222	D13-1264	canine	อองฟอง	คุณอรุณศรี บัวเรือง	Female	Poodle	16	Mass at mammary gland	Simple carcinoma (Anaplastic type)	Tumor	Malignant
116	2013	P5627309	D13-1265	canine	เพชร	คุณสิริรัตน์ พึ่งชมภู	Male	mixed	11	Mass at mammary gland	Simple carcinoma (Anaplastic type)	Tumor	Malignant
117	2013	P5628284	D13-1525	Feline	เเจ๊กการิน	คุณถนิม ฟันเด้นโบการ์ด	Female	DSH	6	Mass at mammary gland	Tubulopapillary carcinoma	Tumor	Malignant
118	2013	P5628052	D13-1486	canine	น้ำหวาน	คุณทวีชัย เเก้วไหลมา	Female	mixed	6	Mass at mammary gland	complex carcinoma	Tumor	Malignant
119	2013	P5625411	D13-1456	canine	น้ำตาล	คุณธีรพงศ์ เลิศชูสกุล	Female	mixed	10	Mass at mammary gland	Tubulopapillary carcinoma	Tumor	Malignant
120	2013	P5627976	D13-1440	canine	หนูเล็ก	คุณพรพิมล เจริญสุข	Female	Poodle	9	Mass at mammary gland	Cystadenocarcinoma	Tumor	Malignant
121	2013	P5627980	D13-1438	canine	ขนุน	คุณสมศรี อินทอง	Female	Golden Retriever	7	Mass at mammary gland	Cystadenocarcinoma	Tumor	Malignant
122	2013	P5517531	D13-1475	canine	สีหมอก	คุณบุญเตียม ชนันไชย	Female	Golden Retriever	10	Mass at mammary gland	complex carcinoma	Tumor	Malignant
123	2013	P5414249	D13-1487	canine	ลาล่า	คุณยุคล นิมมานเหมินทร์	Female	Labrador Retriever	11	Mass at mammary gland	Simple carcinoma (Anaplastic type)	Tumor	Malignant
124	2013	P5627734	D13-1354	canine	แฟนต้า	คุณวชิรา คำฤทธิ์	Female	Mixed	10	Mass at mammary gland	complex carcinoma	Tumor	Malignant
125	2014	P5521003	D14-065	canine	โฟกัส	คุณอำพร อ่อนใจ	Female	mixed	15	Mass at mammary gland	Simple carcinoma (Anaplastic type) with sclerosis	Tumor	Malignant
126	2014	P5729620	D14-127	canine	ฟิว	คุณวันสว่าง เย็นสบายดี	Female	Mixed	10	Mass at mammary gland	Simple carcinoma(Tubulopapillary type)	Tumor	Malignant
127	2014	P5305422	D14-159	canine	ฟอร์ต	คุณวิลาวัลย์ ใจกันทะ	Female	Poodle	3	Mass at mammary gland	Cystadenocarcinoma	Tumor	Malignant
128	2014	P5729766	D14-252	canine	เเมมโม้	คุณรุ่งนภา ศักดาทร	Female	Mixed	12	Mass at mammary gland	Simple carcinoma(Solid type)	Tumor	Malignant
129	2014	P5729745	D14-173	Feline	น้องพลอย	คุณวนิดา วงษา	Male	DSH	16	Mass at mammary gland	Malignant mixed tumor	Tumor	Malignant
130	2014	P5729271	D14-081	canine	บะหมี่	คุณวาสนา พัฒนนิรมาน	Female	Golden Retriever	10	Mass at mammary gland	Simple carcinoma(Solid type)	Tumor	Malignant
131	2014	P5302234	D14-082	canine	น้ำตาล	คุณสิริรักษณ์ ศิริเขตต์	Female	Cocker Spaniel	6	Mass at mammary gland	Benign mixed tumor	Tumor	Benign
132	2014	P5730317	D14-321	canine	มีมี่	คุณบุษราภรณ์ ไชยพรมมา	Female	Shitzu	11	Mass at mammary gland	Simple carcinoma(Solid type)	Tumor	Malignant
133	2014	P5729335	D14-047	canine	ไมโล	คุณอัญชลิการ์ บาวเวนส์	Female	Mixed	10	Mass at mammary gland	Simple carcinoma(Solid type)	Tumor	Malignant
134	2014	P5733760	D14-1440	canine	อรอิน	คุณวันเพ็ญ รัตนกมลกานต์	Female	Mixed	5	Mass at mammary gland	Fibrosarcoma	Tumor	Malignant
135	2014	P5735635	D14-2115	Feline	ข้าวกล่ำ	คุณสุรีย์	Female	American shorthair	8 mo	Mass at mammary gland	Mammary gland adenoma	Tumor	Benign
136	2014	P5729975	D14-300	canine	มู่หยง	คุณธีร พงศ์ศิริวรรณ	Female	Golden Retriever	5	Mass at mammary gland	Fibroma	Tumor	Benign
137	2014	P5627868	D14-1766	canine	ไอดอล	คุณเสาวลักษณ์ ธาตรี	Female	Pomeranian	9	Mass at mammary gland	Carcinoma in Situ	Tumor	Malignant
138	2014	P5733695	D14-1463	Feline	เบบี้		Female	Persian	9	Mass at mammary gland	Cystadenocarcinoma	Tumor	Malignant
139	2014	P5734140	D14-1574	canine	ทองขาว	คุณธนะ เเสงจิตร	Female	Mixed	12	Mass at mammary gland	Simple carcinoma(Solid type)	Tumor	Malignant
140	2014	P5732057	D14-1292	canine	เต้าฮวย	คุณศิริกัญญา ปามา	Female	Mixed	8	Mass at mammary gland	Simple carcinoma (Anaplastic type)	Tumor	Malignant
141	2014	P5518048	D14-1402	canine	สำลี	คุณปานทอง บุญประคอง	Female	Mixed	12	Mass at mammary gland	Squamous cell carcinoma	Tumor	Malignant
142	2014	P5734951	D14-1826	canine	มีโชค	คุณพรทิพย์ คำจันทร์	Female	Shitzu	17	Mass at mammary gland	Simple carcinoma(Tubulopapillary type)	Tumor	Malignant
143	2014	P5300810	D14-1825	canine	ดาวเรือง	คุณนัทธมน อุทธานนท์	Female	Poodle	6	Mass at mammary gland	Simple carcinoma (Anaplastic type)	Tumor	Malignant
144	2014	P5625032	D14-1975	canine	ถุงเท้า	คุณพรรณนา ชุ่มบัวทอง	Female	Mixed	10	Mass at mammary gland	Complex adenocarcinoma	Tumor	Malignant
145	2014	P5735985	D14-2148	canine	บุญอุ้ม	คุณรุ้งเพชร จอมดวง	Female	Poodle	12	Mass at mammary gland	Complex adenoma	Tumor	Benign
146	2014	P5736441	D14-2252	canine	โบนัส	คุณสุลิดา อินยม	Female	Shitzu	9	Mass at mammary gland	Benign mixed tumor	Tumor	Benign
147	2014	P5306811	D14-695	canine	ชมพู่	คุณหญิง ดวงจันทร์	Female	Poodle	10	Mass at mammary gland	Complex carcinoma	Tumor	Malignant
148	2014	P5732325	D14-947	canine	คุ๊กกี้	คุณชุตินิษฐ์	Female	Poodle	10	Mass at mammary gland	Simple carcinoma(Tubulopapillary type)	Tumor	Malignant
149	2014	P5730750	D14-479	canine	โกโก้	คุณจรูญ พรหมสวัสดิ์	Female	Mixed	6	Mass at mammary gland	Simple carcinoma(Solid type)	Tumor	Malignant
150	2014	P5729954	D14-529	canine	หยินหยาง	คุณสุคนธ์ทิพย์ จันทนะ	Female	Pug	11	Mass at mammary gland	Complex carcinoma	Tumor	Malignant
151	2014	P5304239	D14-594	canine	ดุกดิก	คุณกชกร ศิริบุญญพัฒน์	Female	Poodle	9	Mass at mammary gland	Simple carcinoma(Solid type)	Tumor	Malignant
152	2014	P5730866	D14-629	canine	Happy	คุณอมรรัตน์ ชัยอาจ	Female	Poodle	10	Mass at mammary gland	Benign mixed tumor	Tumor	Benign
153	2014	P5731026	D14-575	Feline	ไข่มุก	คุณณัฐยา อุ่นอารี	Female	DSH	10	Mass at mammary gland	Simple carcinoma(Solid type)	Tumor	Malignant
154	2014	P5721360	D14-688	Feline	ถั่วแปป	คุณดาวผกาย พิสิษฐกุล	Female	DSH	1	Mammary gland tissue	Mammary gland hyperplasia with mild degree of inflammation	Non-tumor
155	2014	P5627765	D14-689	canine	ไข่พะโล้	คุณวิยะดา ทรายคำ	Female	Cocker Spaniel	10	Mass at mammary gland	Simple carcinoma (Anaplastic type)	Tumor	Malignant
156	2014	P5731551	D14-748	canine	อ้อยควั่น	คุณจารุวรรณ จันทร์สุวรรณ์	Female	Poodle	7	Mass at mammary gland	Complex adenoma	Tumor	Benign
157	2014	P5730840	D14-702	Feline	นวล	คุณอัญพัชร์ สิริศรีพงศ์	Female	DSH	1	Mass at mammary gland	Simple carcinoma(Tubulopapillary type)	Tumor	Malignant
158	2014	P57300311	D14-320	canine	หนุงหนิง	คุณพรพิมล อมรเสนารักษ์	Female	Mixed	9	Mass at mammary gland	Malignant mixed tumor	Tumor	Malignant
159	2014	P5730020	D14-247	canine	ฟักทอง	คุณเสาวนีย์ ชัยชาญ	Female	Shitzu	14	Mass at mammary gland	Tubulopapillary carcinoma	Tumor	Malignant
160	2014	P5519910	D14-1955	canine	รถถัง	คุณนงนภัส ยูงพณา	Female	Bull dog	13	Mass at mammary gland	Squamous cell carcinoma	Tumor	Malignant
161	2014	P5732017	D14-863	canine	เลดี้	พระภัทรภูมิ อธิปุญโญ	Female	Mixed	15	Mass at mammary gland	Simple carcinoma (Anaplastic type)	Tumor	Malignant
162	2014	P5733545	D14-1363	canine	ปุกปุย	คุณประพร ฑีฆะส้อม	Female	Spitz	15	Mass at mammary gland	Complex adenoma	Tumor	Benign
163	2014	P5307767	D14-1573	canine	ปังปิ้ง	คุณธนาวรรณ ภู่ทอง	Female	Mixed	10	Mass at mammary gland	Cystadenoma	Tumor	Benign
164	2014	P5733788	D14-1507	canine	บุษบา	คุณกรณ์วิภา	Female	Poodle	14	Mass at mammary gland	Complex carcinoma	Tumor	Malignant
165	2014	P5734151	D14-1589	canine	โดนัท	คุณนรชาติ อัติวานิช	Female	Mixed	10	Mass at mammary gland	Cystadenocarcinoma	Tumor	Malignant
166	2014	P5729548	D14-100	canine	แพม	คุณพรชรัตน์ จตุรพรพันธ์	Female	Mixed	5	Mass at mammary gland	Simple carcinoma(Solid type)	Tumor	Malignant
167	2014	P5733456	D14-1366	canine	โซดา	คุณสิริสิน ชางคำ	Female	Poodle	7	Mass at mammary gland	Simple carcinoma(Tubulopapillary type)	Tumor	Malignant
168	2014	P5629072	D13-1770	canine	จินนี่	คุณผาสุก ทัพยุทธพิจารณ์	Female	Poodle	13	Mass at mammary gland	Simple carcinoma(Tubulopapillary type)	Tumor	Malignant
169	2014	P5732356	D14-995	canine	ถุงทอง	คุณสาวิตรี ถาปิรยศ	Female	Mixed	10	Mass at mammary gland	Tubulopapillary carcinoma	Tumor	Malignant
170	2014	P5732558	D14-1059	canine	ปุ๊กปิ๊ก	คุณวลันธร โกมลรัตน์	Female	Shitzu	11	Mass at mammary gland	Simple carcinoma (Anaplastic type)	Tumor	Malignant
171	2014	P5300993	D14-1141	canine	บุญมาร์	คุณอัจฉรา ชัยประสิทธิ์	Female	Yorkshire Terrier	11	Mass at mammary gland	Simple carcinoma(Solid type)	Tumor	Malignant
172	2014	P5732427	D14-996	canine	เเป้ง	คุณไกรสร เลาหชนะกูร	Female	Golden Retriever	6	Mass at mammary gland	Collagenous harmatoma	Non-tumor
173	2014	P5732508	D14-1001	canine	เป๊ปซี่	คุณอัจฉรา ศรีตระกูล	Female	Poodle	5	Mass at mammary gland	Complex carcinoma	Tumor	Malignant
174	2014	P5732178	D14-905	canine	ทองทอง	คุณทรงพันธ์ ตันตระกูล	Female	Mixed	10	Mass at mammary gland	Tubulopapillary carcinoma	Tumor	Malignant
175	2014	P5732174	D14-906	canine	ขวัญตา	คุณกู้เกียรติ บัวเจ็ดธรรม	Female	Poodle	7	Mass at mammary gland	Complex carcinoma	Tumor	Malignant
176	2014	P5732849	D14-1164	canine	ผักกาด	คุณไพรบูลย์ จารุสวัสดิ์	Female	Mixed	5	Mass at mammary gland	Simple carcinoma (Anaplastic type)	Tumor	Malignant
177	2014	P5411562	D14-2038	canine	ถุงเงิน	คุณสานนท์ นพคุณ	Female	French bulldog	5	Mass at mammary gland	Simple carcinoma(Solid carcinoma)	Tumor	Malignant
178	2014	P5735821	D14-2078	canine	เเอบ	คุณจำปา ชัยกาวิล	Female	Mixed	8	Mass at mammary gland	Fibrosarcoma	Tumor	Malignant
179	2014	P5517408	D14-341	canine	นิลกาฬ	คุณสงวนศรี เรืองวงศ์	Female	Poodle	14	Mass at mammary gland	Simple carcinoma (Anaplastic type)	Tumor	Malignant
180	2015	P5843374	D15-2363	canine	ปีใหม่	คุณชลียา บุตรจันทร์	Female	Bangkaew	12	Mass at mammary gland	Simple carinoma (Solid type)	Tumor	Malignant
181	2015	P5733257	D15-2844	Canine	โมโม่จัง	คุณอุษา สุตะวงศ์	Female	Shitzu	15	Mass at mammary gland	Simple carcinoma ( Tubulopapillary type)	Tumor	Malignant
182	2015	P5844833	D15-2886	Canine	เเมม	คุณพงศักดิ์ ธรรมดิน	Female	Mixed	15	Mass at mammary gland	Spindle cell carcinoma	Tumor	Malignant
183	2015	P5520530	D15-0427	Canine	เกี๊ยวซ่า	คุณอังคณา นัตสาสาร	Female	Cocker Spaniel	10	Mass at left mammary gland	Complex carcinoma	Tumor	Malignant
184	2015	P5837125	D15-229	Canine	เลดี้	คุณภัควิชา ณ เชียงใหม่	Female	Poodle	8	Mass at left inguinal mammary gland	Tubulopapillary carcinoma	Tumor	Malignant
185	2015	P5836830	D15-0212	Canine	สุมาลี	คุณ Josh Inman	Female	Poodle	10	Mass at mammary gland	Complex carcinoma	Tumor	Malignant
186	2015	P5414692	D15-2142	Canine	น้ำพริกอ่อง	คุณเกื้อกูล มณีศรี	Female	Labrador Retriever	10	Mass at mammary gland	Squamous cell carcinoma	Tumor	Malignant
187	2015	P5300620	D15-2400	Canine	เเตงกวา	คุณอัจฉริย์ญาณี	Female	Poodle	9	Mass at mammary gland	Simple carcinoma ( Tubulopapillary type)	Tumor	Malignant
188	2015	P5840774	D15-2270	Canine	ถุงทอง	คุณอุไรวรรณ	Female	Mixed	4	Mass at mammary gland	Simple carinoma (Solid type)	Tumor	Malignant
189	2015	P5835924	D15-1087	Canine	นู๋ดี	คุณสุวีณา ถุงเเก้ว	Female	Pug	2	Mass at mammary gland	Mammary gland cystadenoma	Tumor	Benign
190	2015	P5628665	D15-2066	Canine	ข้าวเเตน	คุณเข็มเพชร ฮวดสำราญ	Female	Poodle	7	Mass at mammary gland	Benign mixed mammary gland tumor	Tumor	Benign
191	2015	P5841161	D15-1520	Canine	บ๊อบบี้	คุณณัชชา วรรณฤทธิ์	Female	Mixed	12	Mass at mammary gland	Simple carinoma (Solid type)	Tumor	Malignant
192	2015	P5729241	D15-0585	Canine	หนูดำ	คุณกฤติยา จักรสาร	Female	Mixed	15	Mass at mammary gland	Simple carcinoma ( Tubulopapillary type)	Tumor	Malignant
193	2015	P5837728	D15-0418	Canine	เปอรติ้ส	คุณสุดา สนธิ	Female	Shitzu	15	Mass at mammary gland	Simple carinoma (Solid type)	Tumor	Malignant
194	2015	P5841851	D15-1807	Canine	เจ้าหมี	คุณประสิทธิ โพธินาม	Female	Mixed	10	Mass at mammary gland	Fibrosarcoma	Tumor	Malignant
195	2015	P5837529	D15-0417	Canine	พลอย	คุณเเสงดาว ศาสตร์พงษ์พันธุ์	Female	Shitzu	9	Mass at mammary gland	Simple carcinoma ( Tubulopapillary type)	Tumor	Malignant
196	2015	P5839672	D15-1482	Canine	น้ำหวาน	คุณวิลัย เขาเเท่น	Female	Poodle	11	Mass at mammary gland	Mammary gland adenoma	Tumor	Benign
197	2015	P5521244	D15-1498	Canine	มอมแมม	คุณสนิท ทามณีวัน	Female	mixed	8	Mass at mammary gland	Simple carinoma (Solid type)	Tumor	Malignant
198	2015	P5840480	D15-1445	Canine	ฟร้อน	คุณดาวเรือง สุขเกิด	Female	Cocker Spaniel	10	Mass at mammary gland	Simple carcinoma (Anaplastic type)	Tumor	Malignant
199	2015	P5734522	D14-1709	Canine	หมูหยอง	คุณสุลี วงกุฎ	Female	Shitzu	11	Mass at mammary gland	Complex adenoma	Tumor	Benign
200	2015	P5843179	D15-2318	Canine	แน็ท	คุณธนกฤต ขันธรรม	Female	Mixed	11	Mass at mammary gland	Benign mixed mammary gland tumor	Tumor	Benign
201	2015	P5841898	D15-1961	Canine	จีจี้		Female	Cocker Spaniel	11	Mass at mammary gland	Mixed mammary gland tumor	Tumor	Malignant
202	2015	P5838056	D15-0495	Canine	เฉาก๊วย	คุณกัลยา เหล่าพนักสัก	Male	Poodle	15	Mass at mammary gland	Complex carcinoma	Tumor	Malignant
203	2015	P5410891	D15-2457	Canine	Smiley	คุณอุษา เขียวรอด	Female	Golden Retriever	6	Mass at mammary gland	Simple carcinoma (cystic-papillary type)	Tumor	Malignant
204	2015	P5837922	D15-0443	Canine	ไข่หวาน	คุณวิไลพัชร กาญจนชาติ	Female	Poodle	9	Mass at mammary gland	Cysadenocarcinoma	Tumor	Malignant
205	2015	P5307246	D15-1519	Canine	ไข่เจียว	คุณประเสริฐ บุญเรือง	Female	Poodle	12	Mass at mammary gland	Simple carcinoma ( Tubulopapillary type)	Tumor	Malignant
206	2015	P5837434	D15-0401	Feline	มันนี่	คุณจิราภรณ์ รักชาติ	Female	DSH	12	Mass at mammary gland	Mammary gland cystadenoma	Tumor	Benign
207	2015	P5841074	D15-1496	Canine	โย่	คุณจันทร์นวล จันวงศ์	Female	Mixed	9	Mass at mammary gland	Tubulopapillary carcinoma	Tumor	Malignant
208	2015	P5837319	D15-0261	Canine	ขนมครก	คุณสุพรรณ เกตุสิงห์สร้อย	Female	Poodle	10	Mass at mammary gland	Complex carcinoma	Tumor	Malignant
209	2015	P5840186	D15-1175	Canine	เเตงโม	คุณพงศ์ศิริ ปิตุวัฒน์เจริญกุล	Female	Poodle	10	Mass at mammary gland	Simple carcinoma ( Tubulopapillary type)	Tumor	Malignant
210	2015	P5838145	D15-0518	Canine	ถั่วเหลือง	คุณดารณี อังกฤษ	Male	American Pitbull	5	Mass at mammary gland	Simple carcinoma ( Tubulopapillary type)	Tumor	Malignant
211	2015	P5413012	D15-0496	Canine	แทมมี่	คุณอังคณา ตุ้ยทา	Female	Labrador Retriever	7	Mass at mammary gland	Simple carcinoma ( Tubulopapillary type)	Tumor	Malignant
212	2015	P5840431	D15-1246	Canine	แก้ว	คุณอำนวยศักดิ์ สิทธิเสนา	Male	Mixed	7	Mass at mammary gland	Simple carcinoma ( Tubulopapillary type)	Tumor	Malignant
213	2015		D15-1155	Canine	จิ่งจัง	คุณกมลพร มีมั่งคั่ง	Female	Shitzu	5	Mass at mammary gland	Complex adenoma	Tumor	Benign
214	2015	P5840246	D15-1176	Canine	หมีมี้	คุณสิริวรางค์ ปัญญาเเก้ว	Female	Poodle	11	Mass at mammary glanf	Benign mixed mammary tumor	Tumor	Benign
215	2015	P5839402	D15-1194	Canine	ข้าวปุ้น	ึคุณรัตนาภรณ์ เมฆานิมิตดี	Female	Poodle	12	Mass at mammary gland	Simple carcinoma ( Tubulopapillary type)	Tumor	Malignant
216	2015	P5840352	D15-1208	Canine	มอมเเมม	คุณรุ่งนภา ผิวทอง	Male	Mixed	10	Mass at mammary gland	Simple carcinoma (Solid type)	Tumor	Malignant
217	2015	P5414384	D15-1685	Canine	จูลี่	คุณเมฆินทร์	Female	Cocker Spaniel	9	Mass at mammary gland	Fibrosarcoma	Tumor	Malignant
218	2015	P5843197	D15-2319	Canine	ตุ้มเงิน	คุณบุณยนุช ใจบันทัด	Female	Poodle	9	Mass at mammary gland	Malignant mixed tumor	Tumor	Malignant
219	2015	P5303972	D15-2250	Canine	New	คุณวสันต์ อนันต๊ะ	Female	Cocker Spaniel	9	Mass at mammary gland	Simple carcinoma (Solid type)	Tumor	Malignant
220	2015	P5730867	D15-2251	Canine	น้ำตาล	คุณสุดใจ เเสงเเก้ว	Female	Shitzu	13	Mass at mammary gland	Simple carcinoma (Solid type)	Tumor	Malignant
221	2015	P5842060	D15-1896	Canine	โลตัส	คุณอัมพร จินดา	Female	Labrador Retriever	10	​Mammary gland	Suppurative dermatitis	Non-Tumor
222	2015	P5841281	D15-1945	Canine	น้องเเบม	คุณณัฐวรรณ	Female	Mixed	13	Mass at mammary gland	Basal cell adenoma	Tumor	Benign
223	2015	P5841987	D15-1897	Canine	ไทเกอร์	คุณสิริอัจฉรา	Female	Mixed	7	Mass at mammary gland	Benign mixed mammary gland tumor	Tumor	Benign
224	2015	P5838880	D15-1628	Canine	ปุย	คุณพาฝัน	Female	Poodle	15	Mass at mammary gland	Simple carcinoma (Solid type)	Tumor	Malignant
225	2015	P5733704	D14-1472	Feline	แม่เเมว	คุณปิยนุช โพธาเจริญ	Female	Siamese	10	Mass at mammary gland	Simple carcinoma ( Tubulopapillary type)	Tumor	Malignant
226	2014	P5627680	D14-1542	Canine	มู่หลาน	คุณวิภาวี เเต้เจริญ	Female	Mixed	6	Mass at mammary gland	Complex carcinoma	Tumor	Malignant
227	2015	P5518727	D14-1430	Canine	คิตตี้	คุณพงศ์ศักดิ์ ลือสุวรรณกิจ	Female	Bangkaew	10	Mass at mammary gland	Simple carcinoma (Anaplastic type)	Tumor	Malignant
228	2015	P5733898	D14-1498	Canine	จาว่า	คุณศุภนิตย์ เนตรตระสูตร	Female	Shitzu	12	Mass at mammary gland	Complex adenocarcinoma	Tumor	Malignant
229	2015	P5733383	D14-1310	Canine	ปิง	คุณบัวลอย คงคล	Female	Mixed	13	Mass at mammary gland	Simple carcinoma (Anaplastic type)	Tumor	Malignant
230	2015	P5838093	D15-0539	Feline	ทอง	คุณจุฑารัตน์ พิบูลย์	Female	DSH	12	Mass at mammary gland	Osteosarcoma	Tumor	Malignant
231	2015	P5625119	D14-2065	Canine	คิตตี้	คุณพรรณวลี	Female	Poodle	12	Mass at mammary gland	Cysadenocarcinoma	Tumor	Malignant
232	2015	P5732681	D14-1997	Canine	จูเนียร์	คุณพานิชย์ ศิลปเสริฐ	Female	Poodle	10	Mass at mammary gland	Lipid-rich mammary carcinoma with lymph node metastasis	Tumor	Malignant
233	2015	P5839635	D15-968	Canine	มูมู่	คุณพรชัย บุญธรรม	Female	Golden Retriever	7	Mass at mammary gland	Simple carcinoma (Solid type)	Tumor	Malignant
234	2015	P5839145	D15-0813	Canine	แพนดี้	คุณณัฐกานต์ บัวแก้วเกิด	Female	Mixed	14	Mass at mammary gland	Simple carcinoma ( Tubulopapillary type)	Tumor	Malignant
235	2015	P5839237	D15-0860	Canine	คนอร์	คุณพักตร์พิไล เเทนเทือก	Male	Golden Retriever	8	Mass at mammary gland	Simple carcinoma (Anaplastic type)	Tumor	Malignant
236	2015	P5624706	D15-2190	Canine	คิตตี้	คุณสุรีย์ เหวียนระวี	Female	Shitzu	15	Mass at mammary gland	Malignant mixed mammary gland tumor	Tumor	Malignant
237	2015	P5842613	D15-2100	Canine	โฟร์มด	คุณอุบลรัตน์ พันธ์เจริญพร	Female	Poodle	8	Mass at mammary gland	Benign mixed mammary gland tumor	Tumor	Benign
238	2015	P5736089	D15-1245	Canine	สำลี	คุณสังวร สังข์อร่าม	Female	Mixed	5	Mass at mammary gland	Tubulopapillary cystadenoma	Tumor	Benign
239	2015	P5838337	D15-0605	Canine	โม้โม้	คุณยุพา พงษ์วาท	Female	Spitz	5	Mass at mammary gland	Simple carinoma (Solid type)	Tumor	Malignant
240	2015	P5409966	D15-1085	Canine	แพนด้า	คุณเกศิณี เรือนคำ	Female	Golden Retriever	7	Mass at mammary gland	Fibrosarcoma	Tumor	Malignant
241	2015	P5842748	D15-2373	Canine	จิ๊บ	คุณบุญส่ง ไทยสา	Female	Mixed	9	Mass at mammary gland	Benign mixed mammary gland tumor	Tumor	Benign
242	2015	P5518711	D15-2269	Canine	อะตอม	คุณรุ่งทิวา สุมาลี	Female	Golden Retriever	12	Mass at mammary gland	Benign mixed mammary tumor	Tumor	Benign
243	2015	P5843790	D15-2496	Canine	ใบเตย	คุณไกรฤทธิ์ ธรรมถู	Female	Shitzu	6	Mass at mammary gland	Simple carcinoma (Solid type)	Tumor	Malignant
244	2015	P5839781	D15-2498	Canine	มดส้ม	คุณศรวณีย์ สุขุมวาท	Female	Cocker Spaniel	11	Mass at left mammary gland	Simple carinoma (Solid type)	Tumor	Malignant
245	2015	P5839520	D15-1041	Canine	เจ้าหล่อน		Female	Shitzu	14	Mass at mammary gland	Cystadenocarcinoma	Tumor	Malignant
246	2015	P5842464	58 B 239	Canine	พุดดิ้ง		Female	Mixed	10	Mass at mammary gland	Simple tubular adenocarcinoma	Tumor	Malignant
247	2015	P5410883	58 B 188	Canine	ร็อกกี้		Female	Mixed	10	Mass at mammary gland	Benign mixed mammary tumor	Tumor	Benign
248	2016	P5948092	D16-1048	Canine	เดอะวัน	คุณปรีชาวุฒิ นิรมร	Female	Siberian Husky	13	Mass at mammary gland	Simple carcinoma ( Tubulopapillary type)	Tumor	Malignant
249	2016	P5951391	D16-2470	Canine	หลง		Female	Mixed	10	Mass at mammary gland	Simple carcinoma ( Tubulopapillary type)	Tumor	Malignant
250	2016	P5952277	D16-2761	Canine	กล้วยหอม	คุณธัณชนก เอี่ยมสะอาด	Female	Siberian Husky	8	Mass at mammary gland	Simple carcinoma ( Tubulopapillary type)	Tumor	Malignant
251	2016	P5950386	D16-2004	Canine	หลง	คุณบุญนิธิ ทิวถาวระ	Female	Mixed	10	Mass at mammary gland	Simple carcinoma ( Tubulopapillary type)	Tumor	Malignant
252	2016	P5946142	D16-0495	Canine	มันนี่	คุณนิตยา ทรรศนียาภรณ์	Female	Poodle	10	Mass at mammary gland	Benign mixed mammary gland tumor, Osteosarcoma	Tumor	Malignant
253	2016	P5947606	D16-0888	Canine	มีสุข	คุณพัชรี ป้อมเผือก	Female	Mixed	8	Mass at mammary gland	Osteosarcoma	Tumor	Malignant
254	2016	P5950259	D16-1938	Canine	ปุ้มปุ้ย	คุณสุคนธทิพย์ สุขะหุต	Female	Mixed	15	Mass at mammary gland	Simple carcinoma ( Solid type)	Tumor	Malignant
255	2016	P5842149	D16-0909	Canine	ลีลี่	คุณปิยนุช ลีลารันพล	Female	Golden Retriever	11	Mass at mammary gland	Simple carcinoma ( Solid type)	Tumor	Malignant
256	2016	P5623392	D16-0165	Canine	ยุหว่า	คุณกุลรัศมี ชมภู	Female	Mixed	9	Mass at mammary gland	Simple carcinoma ( Solid type)	Tumor	Malignant
257	2016	P5949942	D16-1875	Canine	จุ๊บเเจง	คุณวัชรินทร์ ดาวเรือง	Female	Mixed	14	Mass at mammary gland	Complex carcinoma, Mixed mammary gland tumor	Tumor	Malignant
258	2016	P5945591	D16-0297	Canine	Baby	คุณทองทวี ศุภาคม	Female	German Sheperd	9	Mass at mammary gland	Benign mixed mammary gland tumor	Tumor	Benign
259	2016	P5736483	D16-0768	Canine	โคล่า	คุณมาลี สุระมิมทร์	Female	Shitzu	11	Mass at mammary gland	Benign mixed mammary gland tumor	Tumor	Benign
260	2016	P5945957	D16-0683	Canine	เดย์ซี่	คุณปียวิทย์ ภาวิจันทร์	Female	Labrador Retriever	10	Mass at mammary gland	Benign mixed mammary gland tumor	Tumor	Benign
261	2016	P5301412	D16-1620	Canine	เเม๊ว	คุณสาคร เสาร์เเปง	Female	Poodle	15	Mass at mammary gland	Benign mixed mammary gland tumor	Tumor	Benign
262	2016	P5844663	D16-1854	Canine	จ๊ะโอ๋	คุณนงลักษณ์ สารเวียง	Female	Shitzu	11	Mass at mammary gland	Simple carcinoma (anaplastic type)	Tumor	Malignant
263	2016	P5843665	D16-1888	Canine	ขาหมู	คุณกฤษณา	Female	Spitz	12	Mass at mammary gland	Simple carcinoma ( Solid type) with cyst	Tumor	Malignant
264	2016	P5950248	D16-1939	Canine	ชินล่า	คุณวีรยุทธ์ ธรรมใจกุล	Female	Shitzu	4	Mass at mammary gland	Mixed mammary gland tumor	Tumor	Malignant
265	2016	P5951632	D16-2493	Canine	หมูปิ้ง	คุณภัญญภัสสร์ ประทุมมินทร์	Female	Mixed	9	Mass at mammary gland	Simple carcinoma ( Solid type)	Tumor	Malignant
266	2016	P5623358	D16-3037	Canine	มินนี่	คุณอภิเชษฐ์ ณสุวรรณ	Female	Mixed	10	Mass at mammary gland	Fibrosarcoma	Tumor	Malignant
267	2016	P5946578	D16-2729	Canine	น้องเเบม	คุณสุนิสา เเสงสุวรรณ์	Female	Poodle	10	Mass at right mammary gland	Adrenocarcinoma	Tumor	Malignant
268	2016	P5952027	D16-2643	Canine	เฉาก๊วย	คุณฟองเเก้ว กองใจ	Female	Poodle	10	Mass at mammary gland	Simple carcinoma ( Tubulopapillary type)	Tumor	Malignant
269	2016	P5952009	D16-2642	Canine	Lucky	คุณวรัญญา สุขเเดง	Female	Mixed	14	Mass at mammary gland	Complex carcinoma	Tumor	Malignant
270	2016	P5730761	D16-1543	Canine	น้องดำ	คุณวัชรี ประเสริฐ	Female	Mixed	14	Mass at mammary gland	Mixed mammary gland tumor	Tumor	Malignant
271	2016	P5949471	D16-1685	Canine	จินนี่	คุณปารุดา อนันตกุลกำเนิด	Female	Chihuahua	11	Mass at mammary gland	Simple carcinoma ( Solid type)	Tumor	Malignant
272	2016	P5949736	D16-1828	Canine	ลินลิน		Female	Chow Chow	10	Mass at mammary gland	Mixed mammary gland tumor	Tumor	Malignant
273	2016	P5950322	D16-2155	Canine	เอาว์ฟี่	คุณเยาวเรศ มูลเมือง	Female	Shitzu	10	Mass at 4th mammary gland	Simple carcinoma ( Solid type)	Tumor	Malignant
274	2016	P5950322	D16-2155	Canine	เอาว์ฟี่	คุณเยาวเรศ มูลเมือง	Female	Shitzu	10	Mass at 3rd and 5th mammary gland	Mammary ductal hyperplasia with no evidence of tumor cell	Non-tumor
275	2016	P5950656	D16-2231	Canine	ถุงเงิน	คุณประภาวรินทร์ กันยานะ	Female	Mixed	6	Mass at mammary gland	Mammary ductal hyperplasia with cyst	Non-tumor
276	2016	P5951105	D16-2279	Canine	Gogo	คุณ Joy Huss	Female	Mixed	10	Mass at mammary gland	Complex carcinoma	Tumor	Malignant
277	2016	P5950174	D16-1937	Canine	พริกไทย	คุณจุฑามาศ	Female	Poodle	3	Mass at mammary gland	Mixed mammary gland tumor	Tumor	Malignant
278	2016	P5949220	D16-1903	Canine	ปุ้มปุ้ย	คุณภัทราภรณ์ บุญตุ้ย	Female	Mixed	10	Mass at mammary gland	Simple carcinoma ( Solid type)	Tumor	Malignant
279	2016	P5949231	D16-1654	Canine	กะทิ	คุณปิ่นวนา สิทธิวงค์	Female	Mixed	10	Mass at mammary gland	Simple carcinoma ( Solid type)	Tumor	Malignant
280	2016	P5949196	D16-1545	Canine	ดวง	คุณศตวรรต อินตา	Female	Mixed	12	Mass at mammary gland	Simple carcinoma ( Solid type)	Tumor	Malignant
281	2016	P5949637	D16-1800	Canine	เปอร์เซีย	คุณวิลัย สุมาลัย	Female	Shitzu	3	Mass at mammary gland	Complex carcinoma	Tumor	Malignant
282	2016	P5624913	D16-1405	Canine	มีมี่	คุณ Winifred Ho	Female	Yorkshire Terrier	10	Mass at mammary gland	Simple carcinoma ( Solid type)	Tumor	Malignant
283	2016	P5949611	D16-1572	Canine	อิฐ	คุณเกสร พรหมมี	Female	Mixed	15	Mass at mammary gland, inguinal lymph node	Simple carcinoma ( Anaplastic type) with inguinal lymph node metastasis	Tumor	Malignant
284	2016	P5948703	D16-1339	Canine	ยุกยิก	คุณจิตติมา สุคนธา	Female	Mixed	14	Mass at 5th mammary gland	Simple carcinoma ( Solid type)	Tumor	Malignant
285	2016	P5946324	D16-0524	Canine	น้ำตาล	คุณสุรัตน์ ใจสักเสริม	Female	Mixed	9	Mass at 3rd-5th left mammary gland	Benign mixed mammary gland tumor	Tumor	Benign
286	2016	P5520090	D16-0821	Canine	เฮง เฮง	คุณนริศรา ปราชญ์วีระกุล	Female	Shitzu	12	Mass at 3rd-5th mammary gland	Simple carcinoma (Tubulopapillary carcinoma)	Tumor	Malignant
287	2016	P5947802	D16-0978	Canine	เปปซี่	คุณสุปราณี โยกาศ	Female	Shitzu	10	Mass at the 4th-5th right mammary gland	Simple carcinoma (Solid type)	Tumor	Malignant
288	2016	P5947039	D16-0810	Canine	ฟักทอง	คุณปริศนา พิบูลย์	Female	Shitzu	13	Mass at the 2nd right mammary gland	Simple carcinoma (anaplastic carcinoma)	Tumor	Malignant
289	2016	P5947011	D16-1022	Canine	น้ำตาล	คุณโฉมสุดา หาญศิริชัย	Female	Mixed	9	Mass at the 4th left mammary gland	Benign mixed mammary gland tumor	Tumor	Benign
290	2016	P5945833	D16-0512	Canine	ดุ๊กดิ๊ก	คุณปิยะพงษ์ มงคลจันทร์	Female	Mixed	12	Mass at mammary gland	Complex carcinoma	Tumor	Malignant
291	2016	P5947536	D16-0911	Canine	จินนี่	คุณเกียรติศักดิ์	Female	Poodle	6	Mass at mammary gland	Complex carcinoma	Tumor	Malignant
292	2016	P5302592	D16-0684	Canine	หมีพูห์	คุณมนิสรา	Female	Mixed	12	Mass at the 4th right mammary gland	Complex carcinoma	Tumor	Malignant
293	2016	P5948328	D16-1188	Canine	น้องนัวร์	คุณธนวัน มังคละพฤกษ์	Female	Dachshund	11	Mass at the 4th-5th right mammary gland	Simple adenoma	Tumor	Benign
294	2016	P5412869	D16-0496	Canine	โฟม	คุณจรูญศักดิ์ เพชรเเก้ว	Female	Cocker Spaniel	10	Mass at mammary gland	Noninfiltrating(in Situ) carcinomas	Tumor	Malignant
295	2016	P5946134	D16-0455	Canine	เเป๊ปซี่	คุณจิตราภรณ์ ดิษเลิศ	Female	German Sheperd	11	Mass at the 4th right mammary gland	Benign mixed mammary gland tumor	Tumor	Benign
296	2016	P5414747	D16-1233	Canine	ปังญ่า	คุณสราวุธ ศิริทวีป	Female	Golden Retriever	8	Mass at 4th left mammary gland	Benign mixed mammary gland tumor	Tumor	Benign
297	2016	P5520250	D16-1689	Canine	ถุงเงิน	คุณรุ่งระวี พิณโนเอก	Female	Poodle	9	Mass at the 4th-5th left mammary gland	Simple carcinoma ( Anaplastic type)	Tumor	Malignant
298	2017	P5730390	D14-355	canine	กุ้ยช่าย	คุณธัญวัตช์ กันต๊ะ	female	shitzu	7	Mass at mammary gland	complex carcinoma	Tumor	Malignant
299	2017	P6008123	D17-1990	Canine	เเบล็ก	คุณพัฒนา นาชัยโชติ	female	Mixed	14	Mass at the mammary gland	Simple carcinoma (Solid pattern, tubulopapillary pattern)	Tumor	Malignant
300	2017	P6009249	D17-2451	Canine	คิม	คุณพรพิมล ปลั่งสมบัติ	female	Mixed	13	Mass at 4th mammary gland	Simple carcinoma (Solid type)	Tumor	Malignant
301	2017	P6008893	D17-2303	Canine	เกมส์	คุณอาจหาญ วุฒิเม	female	Shitzu	9	Mass at 2nd mammary gland	Simple carcinoma (tubulopapillary type)	Tumor	Malignant
302	2017	P6008760	D17-2234	Canine	พิบี้	คุณภาวัต วิชัยณรงค์	female	Siberian Husky	9	Mass at mammary gland	Simple carcinoma (tubulopapillary type)	Tumor	Malignant
303	2017	P5731728	D17-1089	Canine	พลอย	คุณณีราวรรณ์	female	Yorkshire Terrier	7	Mass at 2nd mammary gland	Simple carcinoma (tubulopapillary type)	Tumor	Malignant
304	2017	P5950453	D17-0225	Canine	จีจี้	คุณพลอยณพัชญห์ เปี่ยมบุญ	female	Shitzu	10	Mass at mammary gland	Complex carcinoma	Tumor	Malignant
305	2017	P59101000045	D17-0085	Canine	ปุย	คุณชนกนันท์	female	Mixed	14	Mass at 5th mammary gland	Simple carcinoma (tubulopapillary type)	Tumor	Malignant
306	2017	P6002554	D17-0152	Canine	แป๊ปซี่	คุณอัจฉราพร ศรีตระกูล	female	Poodle	10	Mass at the left mammary gland	Simple carcinoma (tubulopapillary type)	Tumor	Malignant
307	2017	P6011228	D17-3032	Canine	โป่งเหน่ง	คุณปฏิภาณ ปูรณสกุล	female	Mixed	10	Mass at the mammary gland	Complex carcinoma	Tumor	Malignant
308	2017	P6006924	D17-1536	Canine	อุ๋งอิ๋ง	คุณดารารัตน์ สุนทร	female	Poodle	11	Mass at the mammary gland	Benign mixed mammary gland tumor	Tumor	Benign
309	2017	P6004619	D17-0938	Canine	มูมู่	คุณเฉลิมขวัญ ศิริวรรณา	female	Mixed	9	Mass at mammary gland	Complex carcinoma	Tumor	Malignant
310	2017	P6003336	D17-1551	Canine	ชิชา	คุณเปลวเทียน ไชยวงศ์	female	Mixed	12	Mass at 3th mammary gland	Simple carcinoma (tubulopapillary type)	Tumor	Malignant
311	2017	P6004892	D17-0926	Canine	หมูแฮม	คุณนงนุช เส็นดำ	female	Mixed	9	Mass at the mammary gland	Mixed mammary gland tumor	Tumor	Malignant
312	2017	P6003465	D17-0653	Feline	เบบี้	คุณวนิดา ยาเฟอร์	female	Persian	11	Mass at the mammary gland	Simple carcinoma (tubulopapillary type)	Tumor	Malignant
313	2017	P6003526	D17-0552	Feline	อ้วน	คุณธรินทร์ญา เทวภูชม	female	Mixed	14	Mass at the mammary gland	Simple carcinoma (tubulopapillary type)	Tumor	Malignant
314	2017	P6012042	D17-3231	Canine	มูมู่	คุณอารีย์ หงส์ประสิทธิ์	female	Pug	10	Mass at the mammary gland	Simple carcinoma (Solid type)	Tumor	Malignant
315	2017	P6007872	D17-1892	Canine	ข้าวเม่า	คุณโอภาศ เกตุรัตน์	female	Mixed	10	Mass at mammary gland	Squamous cell carcinoma (SCC)	Tumor	Malignant
316	2017	P5303917	D17-3021	Canine	น้ำชา	คุณสุธรรม กันคำ	female	Labrador Retriever	7	Mass at 5th right mammary gland	Simple carcinoma (Solid type)	Tumor	Malignant
317	2017	P6002484	D17-0315	Feline	ชีต้า	คุณอุษา แสนวงค์	female		8 mo	Mammary gland tissue	Feline mammary fibroepithelial hyperplasia	Non-tumor
318	2017	P6007895	D17-2279	Feline	ญาญ่า	คุณรมณ สุขถาวรศิลป์	female	Persian	8 mo	Mass at mammary gland	Simple adenoma	Tumor	Benign
319	2017	P5843375	D17-0015	Canine	ฟักทอง	คุณปริญญาพร อาจสำลิ	female	German sheperd	12	Mass at mammary gland	Simple adenoma with cyst	Tumor	Benign
320	2017	P6005484	D17-1784	Canine	น้ำตาล	คุณสมพร ศรีอักษร	female	Mixed	8	Mass at mammary gland	Fibrosarcoma	Tumor	Malignant
321	2017	P6004074	D17-0708	Canine	แนนซี่	คุณชูวงศ์ สุจริตกุล	female	Jack Russell	9	Mass at mammary gland	Benign mixed mammary gland tumor	Tumor	Benign
322	2017	P5623207	D17-1070	Canine	อุ่นเรือน	คุณสงกรานต์ วงศ์ยวง	female	Poodle	14	Mass at the mammary gland	Osteosarcoma	Tumor	Malignant
323	2017	P6006478	D17-1434	Canine	หมูแดง	คุณวสินธรา แซ่ตั้ง	female	Mixed	7	Mass at mammary gland	Benign mixed mammary gland tumor	Tumor	Benign
324	2017	P6006206	D17-1396	Canine	จู้จี้	คุณอุดมสิน สุจินดา	female	Mixed	6	Mass at mammary gland	Benign mixed mammary gland tumor	Tumor	Benign
325	2017	P6010546	D17-2820	Canine	อีปี้	คุณวัชฎา จันทร์ชัยชนะ	female	Mixed	10	Mass at mammary gland	Simple carcinoma (anaplastic type)	Tumor	Malignant
326	2017	P5901439	D17-0425	Canine	ชบา	คุณทิพยมนต์	female	Miniature Pinscher	12	Mass at mammary gland	Simple carcinoma (Solid type)	Tumor	Malignant
327	2017	P6009382	D17-2478	Canine	เศรษฐี	คุณรัตนา ดวงดี	female	Poodle	12	Mass at mammary gland	Simple carcinoma (anaplastic type)	Tumor	Malignant
328	2017	P6009273	D17-2512	Canine	ไข่ดาว	คุณสุริยา ทาริเดช	female	Shitzu	10	Mass at mammary gland	Simple carcinoma (Solid type)	Tumor	Malignant
329	2017	P5302036	D17-2710	Canine	อาฟูก	คุณชนิสรา ขจรขรรคเพชร	female	Chihuahua	16	Mass at mammary gland	Mammary gland hyperplasia	Non-tumor
330	2017	P5842178	D17-2711	Canine	น้องกล้วยหอม	คุณณัฐวรรณ บุญหมั่น	female	Poodle	11	Mass at mammary gland	Complex carcinoma	Tumor	Malignant
331	2017	P6009124	D17-2759	Canine	เงิน	คุณประทานทิพย์ กระมล	female	Mixed	7	Mass at mammary gland	Simple carcinoma (anaplastic type)	Tumor	Malignant
332	2017	P6010981	D17-2924	Canine	มะลิ	คุณชลธิรศน์ วิริยะรัตนพร	female	Bangkaew	7	Mass at 3th mammary gland	Simple carcinoma (Solid type)	Tumor	Malignant
333	2018	P6116778	D18-1301	Canine	ทีน่า	คุณศิริกาญจน์ วิชัยศิริ	Female	Mixed	10	Mass at mammary gland	Papillary cystic adenocarcinoma with suppurative mastitis	Tumor	Malignant
334	2018	P5902030	CHM370	Feline	มั่งมี	คุณพรพิมล	Female	DSH	8	Mass at mammary gland	Simple tubular carcinoma grade 2	Tumor	Malignant
335	2018	P5901375	CHM125	Canine	ลูกชิ้น	คุณจตุรงค์ เขื่อนคำ	Female	Poodle	8	Mass at mammary gland	Simple tubular adenocarcinoma Grade 2	Tumor	Malignant
336	2018	P6114137	CHM126	Feline	Tingerbell		Female	Persian	7	Mass at mammary gland	Simple papillary adenoma	Tumor	Benign
337	2018	P6115533	CHM174	Canine	จิกปิก	คุณเบญจวรรณ	Female	Mixed	15	Mass at mammary gland	Extraskeletal osteosarcoma	Tumor	Malignant
338	2018	P5516944	CHM331	Canine	ปองปอง	คุณภาวิดา จินะเปิงกาศ	Female	Poodle	9	Mass at mammary gland	Benign mixed mammary gland tumor	Tumor	Benign
339	2018	P6117248	CHM480	Canine	ใบเงิน	คุณอรกัญญา	Female	Shitzu	8	Mass at mammary gland	Papillary cystic adenocarcinoma grade 2	Tumor	Malignant
340	2018	P61133195	CHM062	Feline	ตาหวาน	คุณพิชญสินี	Female	DSH	12	Mass at mammary gland	Simple tubulo-papillary adenocarcinoma	Tumor	Malignant
341	2018	P6119046	CHM439	Canine	มอมแมม	คุณนภัสกนก คำใส	Female	Mixed	11	Mass at mammary gland	Simple papillary cystic adenoma	Tumor	Benign
342	2018	P6008725	D18-2025	Canine	น้องเชลซี	คุณวันเพ็ญ สุขใจรังสรรค์	Female	Shitzu	7	Mass at mammary gland	Complex mammary carcinoma	Tumor	Malignant
343	2018	P6113115	D18-0267	Canine	ฟ้าใส	คุณกัญญ์ญัช	Female	Poodle	10	Mass at mammary gland	Simple carcinoma (tubulopapillary pattern)	Tumor	Malignant
344	2018	P6113378	D18-0367	Canine	จังกึม	คุณจิตรัตดา บุญลือ	Female	Poodle	11	Mass at mammary gland	Osteosarcoma	Tumor	Malignant
345	2018	P6113663	D18-0460	Canine	พัตต์	คุณอ้อย คำนวณ	Female	Chihuahua	10	Mass at mammary gland	Mixed mammary gland tumor	Tumor	Malignant
346	2018	P6113802	D18-0492	Canine	แหม่ม	คุณสมคิด เฉียบแหลม	Female	Poodle	11	Mass at mammary gland	Simple carcinoma (tubulopapillary pattern)	Tumor	Malignant
347	2018	P6112369	D18-0511	Canine	มะลิ	คุณอุทัย ฉ่ำบุญรอด	Female	Poodle	12	Mass at mammary gland	Complex carcinoma	Tumor	Malignant
348	2018	P6114103	D18-0573	Canine	ทอง	คุณอมรรัตน์ สร้อยทองเย็น	Female	Golden Retriever	6	Mass at mammary gland	Compex carcinoma	Tumor	Malignant
349	2018	P6114290	D18-0645	Canine	บุ๋มบิ๋ม	คุณพัชรพิมพ์ เชียงใหม่	Female	Poodle	8	Mass at mammary gland	Simple carcinoma (tubulopapillary pattern)	Tumor	Malignant
350	2018	P5521778	D18-2184	Canine	คุกกี้	คุณปิ ลุงจาย	Female	Poodle	7	Mass at mammary gland	Mammary mixed tumor	Tumor	Malignant
351	2018	P6006059	D18-2254	Canine	ถุงทอง	คุณปริมชญาดา อัครเนตร	Female	Mixed	11	Mass at mammary gland	Mammary mixed tumor	Tumor	Malignant
352	2018	P6119671	D18-2519	Canine	ข้าวปั้น	คุณพลับพลึง อุ่นเรือนพงศ์	Female	Poodle	7	Mass at mammary gland	Mammary mixed tumor	Tumor	Malignant
353	2018	P6119594	D18-2560	Canine	มีมี่	คุณดวงเดือน ณ ลำพูน	Female	Poodle	10	Mass at mammary gland	Mammary mixed tumor and complex mammary carcinoma	Tumor	Malignant
354	2018	P6113804	D18-2626	Canine	ครัวซอง	คุณรักษ์พล จันทเลิศ	Female	Cocker Spaniel	14	Mass at mammary gland	Mammary mixed tumor	Tumor	Malignant
355	2018	P6119151	D18-2479	Canine	ลักกี้	คุณสริญญา บุญชูวิทย์	Female	Mixed	7	Mass at mammary gland	Anaplastic carcinoma	Tumor	Malignant
356	2018	P6118743	D18-2175	Feline	ยูยี่	คุณตันติพงษ์ ทองคำ	Female	Persian	10	Mass at mammary gland	Simple carcinoma (tubular type)	Tumor	Malignant
357	2018	P6118751	D18-2172	Feline	สามสี	คุณนุชนาถ สุรพงษ์จินดา	Female	DSH	10	Mass at mammary gland	Solid mammary gland carcinoma	Tumor	Malignant
358	2018	P5841061	D18-1605	Canine	ปุ๊ก	คุณโฉมสุดา หาญศิริชัย	Female	Poodle	12	Mass at mammary gland	Simple carcinoma (Tubulopapillary type)	Tumor	Malignant
359	2018	P61168451	D18-1606	Canine	คุกกี้	คุณภาวีนี มาอาส	Female	Golden Retriever	11	Mass at mammary gland	Simple mammary carcinoma (Tubular type)	Tumor	Malignant
360	2018	P6118106	D18-1849	Canine	หมูแดง	คุณจินตนา โพธิ์แดง	Female	Mixed	16	Mass at mammary gland	Complex carcinoma	Tumor	Malignant
361	2018	P6118289	D18-1929	Canine	หมูแดง	คุณอัญชลี บุญสุข	Female	Shitzu	12	Mass at mammary gland	Simple mammary carcinoma (Papillary type)	Tumor	Malignant
362	2018	P61118386	D18-1957	Canine	สเปค	คุณมยุรี จารวัสตร์	Female	Mixed	10	Mass at mammary gland	Anaplastic carcinoma	Tumor	Malignant
363	2018	P6118774	D18-2104	Canine	เตียนหอม	คุณชาลิศา วงศ์ไหม	Female	Shitzu	13	Mass at mammary gland	Mammary mixed tumor	Tumor	Malignant
364	2018	P5628625	D18-0747	Canine	ปาร์ตี้	คุณวรพล ชัยศรี	Female	Shitzu	5	Mass at mammary gland	Complex carcinoma	Tumor	Malignant
365	2018	P6114703	D18-0788	Canine	ยูริโกะ	คุณศศิธร สุขตาวุธ	Female	Chihuahua	10	Mass at mammary gland	Complex carcinoma	Tumor	Malignant
366	2018	P6119821	D18-0903	Canine	แองเจิ้ล	คุณมาโนส กล่ำแสง	Female	American Pitbull	10	Mass at mammary gland	Anaplastic carcinoma	Tumor	Malignant
367	2018	P6115534	D18-0953	Canine	สนิม	คุณรัชนู อุปพันธ์	Female	Mixed	8	Mass at mammary gland	Anaplastic carcinoma	Tumor	Malignant
368	2018	P6115673	D18-0987	Canine	บูบู้	คุณวิทยา สุวรรณนำ	Female	Mixed	8	Mass at mammary gland	Mammary mixed tumor	Tumor	Malignant
369	2018	P6114699	D18-0989	Canine	เหมย	คุณภัคนุช ปันสิทธิ์	Female	Mixed	10	Mass at mammary gland	Complex adenoma	Tumor	Benign
370	2018	P6121242	D18-3129	Canine	โค้ก	คุณเสาวนิตย์ ศิริพงษ์	Female	Dachshund	11	Mass at mammary gland	Complex carcinoma	Tumor	Malignant
371	2018	P6114669	D18-0789	Canine	เหมย	คุณภัคนุช ปันสิทธิ์	Female	Mixed	11	Mass at mammary gland	Simple carcinoma (tubular type)	Tumor	Malignant
372	2018	P6116147	D18-1095	Canine	วันดี	คุณฉวีวรรณ พรหมสุวรรณ์	Female	Mixed	7	Mass at mammary gland	Solid carcinoma	Tumor	Malignant
373	2018	P6116401	D18-1099	Canine	บุ๋ย	คุณณัฐวรรณ บุญหมั่น	Female	Mixed	13	Mass at mammary gland	Fibroadenoma	Tumor	Benign
374	2018	P6416370	D18-1219	Canine	วินดี้	คุณชณิชา จินาการ	Female	Golden Retriever	9	Mass at mammary gland	Simple mammary adenoma	Tumor	Benign
375	2019	P6225636	D19-1550	Canine	แบมแบม	คุณวรัญญา เอื้อตระกูล	Female	Beagle	11	Mass at mammary gland	Tubular carcinoma	Tumor	Malignant
376	2019	P6227084	D19-2154	Canine	โคโค่	คุณสุธิชา สุขรัตน์	Male	Mixed	1	Mass at mammary gland	Complex adenoma	Tumor	Benign
377	2019	P6007062	D19-0300	Canine	แฮปปี้	คุณวาสินี โอโกชิ	Female	Dachshund	11	Mass at mammary gland	Benign mixed tumor	Tumor	Benign
378	2019	P6121574	CHM10	Canine	บุญหลง	คุณพิทักษ์	Female	Cocker Spaniel	10	Mass at mammary gland	Complex adenocarcinoma	Tumor	Malignant
379	2019	P5948799	D19-0072	Canine	โทนี่	คุณดารัณ สิกวานิช	Female	Miniature Pinscher	12	Mass at mammary gland	Solid mammary gland carcinoma	Tumor	Malignant
380	2019	P6222520	D19-0255	Canine	Beth	คุณ Charles William	Female	Alaskan Malamute	9	Mass at mammary gland	Mammary mixed tumor grade 2	Tumor	Malignant
381	2019	P6121632	D19-0416	Feline	ขาวขาว	คุณรัชพล แซ่ลิ้ม	Female	DSH	10	Mass at mammary gland	Simple mammary carcinoma (Tubular type)	Tumor	Malignant
382	2019	P6223021	D19-0482	Canine	ซูซาน	คุณศศิธร สุขิตาวุธ	Female	Chihuahua	9	Mass at mammary gland	Complex carcinoma	Tumor	Malignant
383	2019	P6224188	D19-0904	Canine	พุงพลุ้ย	คุณหนึ่งฤทัย	Female	Shitzu	10	Mass at mammary gland	Solid carcinoma	Tumor	Malignant
384	2019	P5305218	D19-1381	Canine	เฉาก๊วย	คุณเพ็ญศรี สามคำ	Female	Mixed	8	Mass at mammary gland	Comedocarcinoma	Tumor	Malignant
385	2019	P6225149	D19-1271	Canine	บี	คุณเจษฎาดล ทาน้อย	Female	Chihuahua	14	Mass at mammary gland	Simple mammary carcinoma (Cystic papillary type)	Tumor	Malignant
386	2019	P6225051	D19-1273	Canine	กุ๊ชชี่	คุณพิชญามนฑ์ แก่นจันทร์วงศ์	Female	Poodle	12	Mass at mammary gland	Fibroadenoma	Tumor	Benign
387	2019	P6224811	D19-1162	Canine	ปุ๊กกี้	คุณสุวินัย ชัยปัญญา	Female	Poodle	10	Mass at mammary gland	Complex adenoma	Tumor	Benign
388	2019	P6226185	D19-1706	Feline	กาฟิลด์	คุณอรณัชชา ชะนะหัง	Female	DSH	8	Mass at mammary gland	Cribiform carcinoma	Tumor	Malignant
389	2019	P6222705	D19-1142	Canine	ลาเต้	คุณสรินยา เรืองเวช	Female	Shitzu	9	Mass at mammary gland	Complex carcinoma	Tumor	Malignant
390	2019	P6224843	D19-1163	Canine	คุ้กกี้	คุณฟองแก้ว บุญชัน	Female	Mixed	13	Mass at mammary gland	Complex carcinoma	Tumor	Malignant
391	2019	P6223527	D19-1686	Feline	ชมพู่	คุณลำปลายมาศ ต่างพันธุ์	Female	Persian	2	Mass at mammary gland	Comedocarcinoma	Tumor	Malignant
392	2019	P6225619	D19-1495	Canine	กาแฟ	คุณคลีนรา ทองคำ	Female	Mixed	10	Mass at mammary gland	Anaplastic carcinoma	Tumor	Malignant
393	2019	P6226171	CHM333	Canine	สไปรท์	คุณพิสิษฐ์	Female	Mixed	3	Mass at mammary gland	Papillary adenocarcinoma	Tumor	Malignant
394	2019	P6227241	CHM384	Canine	โปรเจค	คุณศิริพร	Female	Pomeranian	4	Mass at mammary gland	Solid carcinoma	Tumor	Malignant
395	2019	P6225346	CHM285	Feline	โมง	คุณวิลาวรรณ	Female	DSH	5	Mass at mammary gland	Simple tubular adenocarcinoma, grade 2	Tumor	Malignant
396	2019	P6225211	CHM235	Canine	ส้มโอ	คุณจินตนา	Female	Mixed	5	Mass at mammary gland	Benign mixed mammary tumor	Tumor	Benign
397	2019	P6223410	CHM234	Canine	หมูน้อย	คุณอัมพร	Female	Shitzu	3	Mass at mammary gland	Simple papillary and ductal adenocarcinoma, grade 1	Tumor	Malignant
398	2019	P6225383	CHM268	Canine	สีขาว	คุณธวัชชัย	female	Mixed	10	Mass at mammary gland	Anaplastic carcinoma	Tumor	Malignant
399	2019	P5628666	CHM149	Canine	ข้าวแตน	คุณนสินี	female	Mixed	12	Mass at mammary gland	Benign mixed mammary tumor	Tumor	Benign
400	2019	P6119547	CHM326	Canine	ขำขำ	คุณประภาศรี	Female	Pomeranian	6	Mass at mammary gland	Benign mixed tumor	Tumor	Benign
401	2019	P6121580	CHM24	Canine	กุ้งกิ้ง		Female	Mixed	11	Mass at mammary gland	Simple tubular adenocarcinoma, grade 1	Tumor	Malignant
402	2019	P6121595	CHM3	Canine	กีต้า	คุณพวงชมพู	Female	Siberian Husky	8	Mass at mammary gland	Solid carcinoma, grade 3	Tumor	Malignant
403	2019	P6223591	CHM122	Canine	แบมแบม		Female	Mixed	11	Mass at mammary gland	Simple tubular adenocarcinoma, grade 2	Tumor	Malignant
404	2019	P6223629	CHM127/1	Canine	พูลทรัพย์1	คุณประเวท	Female	Mixed	15	Mass at mammary gland	Simple tubular adenocarcinoma, grade 2	Tumor	Malignant
405	2019	P6224466	CHM176	Canine	ดำ	คุณฟองอินทร์	Female	Mixed	10	Mass at mammary gland	Anaplastic carcinoma	Tumor	Malignant
406	2019	P6120816	CHM46	Canine	หมูตุ๋น		Female	Shitzu	11	Mass at mammary gland	Simple tubular adenocarcinoma	Tumor	Malignant
407	2019	P6227909	CHM12	Canine	มะเขือ	คุณเดชา	Female	Beagle	10	Mass at mammary gland	Invasive tubular adenocarcinoma, grade 2	Tumor	Malignant
408	2019	P6224489	D19-1063	Canine	เฮเลน	คุณศศิธร สุขิตาวุธ	Female	Chihuahua	9	Mass at mammary gland	Solid carcinoma	Tumor	Malignant
409	2019	P6222712	D19-0352	Canine	บุ้งกี๋	คุณทิพย์วรรณ มณีไกรสอน	Female	Beagle	11	Mass at mammary gland	Mammary mixed tumor	Tumor	Malignant
410	2019	P6223866	D19-0802	Feline	ขาว	คุณศราวุธ ติ๊บแก้ว	Female	DSH	7	Mass at mammary gland	Solid carcinoma	Tumor	Malignant
411	2019	P6223702	D19-0726	Canine	สไปรท์	คุณณน่าน เจริญสือสกุล	Female	French Bulldog	5	Mass at mammary gland	Mammary mixed tumor	Tumor	Malignant
412	2019	P6222930	D19-0547	Feline	เหมียว	คุณดวงเดือน คำภิคำ	Female	DSH	13	Mass at mammary gland	Intraductal papillary adenoma	Tumor	Benign
413	2019	P6223071	D19-0655	Feline	แห้ง	คุณสำราญ มูลลา	Female	DSH	7	Mass at mammary gland	Simple carcinoma (tubular type)	Tumor	Malignant

## Sheet: Repeat data
No	Year	HN		Case No	Animal	Pateint name	Owner name	Sex	Breed	Age	Location	Diagnosis
1	2012	P5519189	2	D12-680	canine	โรบิน	คุณเจตศรันย์ สุวรรณธานี	Female	Miniature	8	Mass at mammary gland	Solid carcinoma
2	2012	P5521271	2	D12-1567	canine	โบโบ้	คุณพนิตนาฎ นันทขว้าง	Female	Mixed	8	Mass at mammary gland	Malignant mixed tumor
3	2012	P5521271		D12-1290	canine	โบโบ้	คุณพนิตนาฎ นันทขว้าง	Female	Mixed	8	Mass at mammary gland	Tubulopapillary carcinoma
4	2012	P5520505	2	D12-1008	canine	Pixxy	คุณเพิร์ล วัฒนากุล	Female	Bangkaew	10	Mass at mammary gland	Carcinoma metastasis lymph node
5	2012	P5520505		D12-1007	canine	Pixxy	คุณเพิร์ล วัฒนากุล	Female	Bangkaew	10	Mass at mammary gland	Tubulopapillary carcinoma
6	2013	P5628409	2	D13-1598	canine	ดุ๊กดิ๊ก	คุณจินต์ บุญยะ	Female	mixed	15	Mass at mammary gland	Simple carcinoma (Solid type)
7	2013	P5623445	2	D13-113	canine	เข็มทอง	คุณเบญจพร หอมจิตต์	Female	mixed	10	Mass at mammary gland	Fibrosarcoma
8	2013	P5412732	2	D13-546	canine	จ๊อบเเจ๊บ	คุณกมลวรรณ จันทร์วงษ์	Female	Poodle	9	Mass at mammary gland	Tubulopapillary carcinoma
9	2013	P5628409		D13-1598	canine	ดุ๊กดิ๊ก	คุณจินต์ บุญยะ	Female	mixed	15	Mass at mammary gland	Simple carcinoma (Solid type)
10	2013	P5307245	2	D13-1202	canine	เจี้ยว	คุณประเสริฐ บุญเรือง	Female	mixed	10	Mass at mammary gland	Malignant mixed tumor
11	2013	P5623445		D13-1249	canine	เข็มทอง	คุณเบญจพร หอมจิตต์	Female	Mongrel	10	Mass at mammary gland	Simple carcinoma (Anaplastic type)
12	2013	P5628284	2	D13-1525	feline	เเจ๊กการิน	คุณถนิม ฟันเด้นโบการ์ด	Female		6	Mass at mammary gland	Tubulopapillary carcinoma
13	2013	P5627976	2	D13-1440	canine	หนูเล็ก	คุณพรพิมล เจริญสุข	Female	mixed	9	Mass at mammary gland	Cystadenocarcinoma
14	2013	P5517531	2	D13-1475	canine	สีหมอก	คุณบุญเตียม ชนันไชย	Female	GR	10	Mass at mammary gland	complex carcinoma
15	2013	P5414249	2	D13-1487	canine	ลาล่า	คุณยุคล นิมมานเหมินทร์	Female	LR	11	Mass at mammary gland	Simple carcinoma (Anaplastic type)
16	2013	P5627734	2	D13-1354	canine	แฟนต้า	คุณวชิรา คำฤทธิ์	Female	Mixed	10	Mass at mammary gland	complex carcinoma
17	2013	P5517531		D13-1475	canine	สีหมอก	คุณบุญเตียม ชนันไชย	Female	GR	10	Mass at mammary gland	complex carcinoma
18	2013	P5414249		D13-1487	canine	ลาล่า	คุณยุคล นิมมานเหมินทร์	Female	LR	11	Mass at mammary gland	Simple carcinoma (Anaplastic type)
19	2013	P5627734		D13-1354	canine	แฟนต้า	คุณวชิรา คำฤทธิ์	Female	Mixed	10	Mass at mammary gland	complex carcinoma
20	2014	P5628284		D14-070	feline	เเจ๊กการิน	คุณถนิม พันเด้น โปการ์ด	Female	DSH	7	Mass at mammary gland	Tubulopapillary carcinoma
21	2014	P5305422		D14-159	canine	ฟอร์ต	คุณวิลาวัลย์ ใจกันทะ	Female	Poodle	10	Mass at mammary gland	Cystadenocarcinoma
22	2014	P5729766	2	D14-252	canine	เเมมโม้	คุณรุ่งนภา ศักดาทร	Female	Mixed	12	Mass at mammary gland	Simple carcinoma(Solid type)
23	2014	P5302234	2	D14-082	canine	น้ำตาล	คุณสิริรักษณ์ ศิริเขตต์	Female	Cocker	6	Mass at mammary gland	Benign mixed tumor
24	2014	P5627976		D14-230	canine	หนูเล็ก	คุณพรพิมล เจริญสุข	Female	Poodle	10	Mass at mammary gland	Malignant mixed tumor
25	2014	P5732057	2	D14-1292	canine	เต้าฮวย	คุณศิริกัญญา ปามา	Female	Mixed	8	Mass at mammary gland	Simple carcinoma (Anaplastic type)
26	2014	P5305422		D14-907	canine	ฟอร์ต	คุณวิลาวัลย์ ใจกันทะ	Female	Poodle	3	Mass at mammary gland	Anaplastic carcinoma
27	2014	P5519910	2	D14-1955	canine	รถถัง	คุณนงนภัส ยูงพณา	Female	Bull dog	13	Mass at mammary gland	Squamous cell carcinoma
28	2014	P5732057		D14-896	canine	เต้าฮวย	คุณศิริญญา ปามา	Female	Poodle	8	Mass at mammary gland	Myxosarcoma
29	2014	P5411562	2	D14-2038	canine	ถุงเงิน	คุณสานนท์ นพคุณ	Female	French bulldog	5	Mass at mammary gland	Simple carcinoma(Solid carcinoma)
30	2014	P5735821		D14-2078	canine	เเอบ	คุณจำปา ชัยกาวิล	Female	Mixed	8	Mass at mammary gland	Fibrosarcoma
31	2014	P5411562		D14-2038	canine	ถุงเงิน	คุณสานนท์ นพคุณ	Female	French bulldog	5	Mass at mammary gland	Simple carcinoma(Solid carcinoma)
32	2014	P5735821		D14-2078	canine	เเอบ	คุณจำปา ชัยกาวิล	Female	Mixed	8	Mass at mammary gland	Fibrosarcoma
33	2015	P5519910		D14-1955	Canine	รถถัง	คุณนงนภัส ยูงพณา	Female	Bull dog	13	Mass at mammary gland	Squamous cell carcinoma
34	2015	P5300620	2	D15-2400	Canine	เเตงกวา	คุณอัจฉริย์ญาณี	Female	Poodle	9	Mass at mammary gland	Simple carcinoma ( Tubulopapillary type)
35	2015	P5628665		D15-2066	Canine	ข้าวเเตน	คุณเข็มเพชร ฮวดสำราญ	Female	Poodle	7	Mass at mammary gland	Benign mixed mammary gland tumor
36	2015	P5841851	2	D15-1807	Canine	เจ้าหมี	คุณประสิทธิ โพธินาม	Female	Mixed	10	Mass at mammary gland	Fibrosarcoma
37	2015	P5841851		D15-1807	Canine	เจ้าหมี	คุณประสิทธิ โพธินาม	Female	Mixed	10	Mass at mammary gland	Complex carcinoma
38	2015	P5839672	2	D15-1482	Canine	น้ำหวาน	คุณวิลัย เขาเเท่น	Female	Poodle	11	Mass at mammary gland	Mammary glnad adenoma
39	2015	P5307245		D15-1519	Canine	ไข่เจียว	คุณประเสริฐ บุญเรือง	Female	Poodle	12	Mass at mammary gland	Simple carcinoma ( Tubulopapillary type)
40	2015	P5839672		D15-1007	Canine	น้ำหวาน	คุณวิลัย เขาเเท่น	Female	Poodle	11	Mass at mammary gland	Simple carcinoma ( Tubulopapillary type)
41	2015	P5519189		D15-2807	Canine	โรบิน	คุณเจตศรัญณ์	Female	Miniature	11	Mass at mammary gland	Benign mixed mammary tumor
42	2015	P5729766		D15-1745	Canine	แมมโบ้	คุณรุ่งนภา ศักดาทร	Female	Mixed	13	Mass at mammary gland	Fibrosarcoma
43	2015	P5840431	2	D15-1246	Canine	แก้ว	คุณอำนวยศักดิ์ สิทธิเสนา	Male	Mixed	7	Mass at mammary gland	Simple carcinoma ( Tubulopapillary type)
44	2015	P5302234		D15-0206	Canine	น้ำตาล	คุณศิริลักษณ์ ศิริเขตต์	Female	Cocker	7	Mass at mammary gland, lymph node	Simple carcinoma ( Tubulopapillary type)
45	2015	P5840431		D15-2067	Canine	แก้ว	คุณอำนวยศักดิ์ สินธิเสนา	Male	Mixed	7	Mass at mammary gland	Solid carcinoma with metastasis in the lymph node
46	2016	P5300620		D16-0248	Canine	เเตงกวา	คุณอัจฉรีย์ญาณี	Female	Poodle	9	Mass at mammary gland	Simple carcinoma ( Solid type)
47	2016	P5950322	2	D16-2155	Canine	เอาว์ฟี่	คุณเยาวเรศ มูลเมือง	Female	Shitzu	10	Mass at 4th mammary gland	Simple carcinoma ( Solid type)
48	2016	P5950322		D16-2155	Canine	เอาว์ฟี่	คุณเยาวเรศ มูลเมือง	Female	Shitzu		Mass at 3rd and 5th mammary gland	Mammary ductal hyperplasia with no evidence of tumor cell
49	2016	P5412732		D16-0454	Canine	จ๊อบเเจ๊บ	คุณรัชนี จันทร์วงษ์	Female	Mixed	12	Mass at mammary gland	Simple carcinoma ( Tubulopapillary type)
50	2016	P5520250	2	D16-1689	Canine	ถุงเงิน	คุณรุ่งระวี พิณโนเอก	Female	Poodle	9	Mass at the 4th-5th left mammary gland	Simple carcinoma ( Anaplastic type)
51	2016	P5520250		D16-1689	Canine	ถุงเงิน	คุณรุ่งระวี พิณโนเอก	Female	Poodle	9	Mass at the 4th-5th right mammary gland	Simple adenocarcinoma
52	2017	P6003336	2	D17-1551	Canine	ชิชา	คุณเปลวเทียน ไชยวงศ์	female	Mixed	12	Mass at 3th mammary gland	Simple carcinoma (tubulopapillary type)
53	2017	P6003336		D17-1551	Canine	ชิชา	คุณเปลวเทียน ไชยวงศ์	female	Mixed	12	Mass at 4th mammary gland	Benign mixed mammary gland tumor
54	2017	P6003465	2	D17-0653	Feline	เบบี้	คุณวนิดา ยาเฟอร์	female	Persian	11	Mass at the mammary gland	Simple carcinoma (tubulopapillary type)
55	2017	P6003465		D17-0653	Feline	เบบี้	คุณวนิดา ยาเฟอร์	female	Persian	11	Mass at the mammary gland	Simple adenoma
56	2017	P5842178	2	D17-2711	Canine	น้องกล้วยหอม	คุณณัฐวรรณ บุญหมั่น	female	Poodle	11	Mass at mammary gland	Complex carcinoma
57	2018	P5902030	2	CHM370	Feline	มั่งมี	คุณพรพิมล	Female	DSH	8	Mass at mammary gland	Simple tubular carcinoam grade 2
58	2018	P5842178		CHM141	Canine	น้องกล้วยหอม	คุณณัฐวรรณ บุญหมั่น	Female	Poodle	12	Mass at mammary gland	Solid carcinoma and anaplastic carcinoma Grade 3
59	2018	P6113804	2	D18-2626	Canine	ครัวซอง	คุณรักษ์พล จันทเลิศ	Female	Cocker Spaniel	14	Mass at mammary gland	Mammary mixed tumor
60	2018	P5841061	2	D18-1605	Canine	ปุ๊ก	คุณโฉมสุดา หาญศิริชัย	Female	Mixed	12	Mass at mammary gland	Simple carcinoma (Tubulopapillary type)
61	2018	P6118289	3	D18-1929	Canine	หมูแดง	คุณอัญชลี บุญสุข	Female	Shitzu	12	Mass at mammary gland	Simple mammary carcinoma (Papillary type)
62	2018	P6118289		D18-1929	Canine	หมูแดง	คุณอัญชลี บุญสุข	Female	Shitzu	12	Mass at mammary gland	Simple mammary carcinoma (Tubular type)
63	2018	P6118289		D18-1929	Canine	หมูแดง	คุณอัญชลี บุญสุข	Female	Shitzu	12	Mass at mammary gland	Solid mammary carcinoma
64	2018	P5841061		D18-2024	Canine	ปุ๊ก	คุณโฉมสุดา หาญศิริชัย	Female	Poodle	12	Mass at mammary gland	Simple carcinoma (Tubulopapillary type)
65	2018	P5842178	2	D18-1044	Canine	น้องกล้วยหอม	คุณสมาน สร้อยสม	Female	Poodle	12	Mass at mammary gland	Complex carcinoma
66	2018	P5842178		D18-1044	Canine	น้องกล้วยหอม	คุณณัฐวรรณ บุญหมั่น	Female	Poodle	12	Mass at mammary gland	Complex carcinoma
67	2019	P5902030		D19-1601	Feline	มั่งมี	คุณนิรมล จินะชิตตรา	Female	DSH	10	Mass at mammary gland	Tubular carcinoma
68	2019	P6113804		D19-0323	Canine	ครัวซอง	คุณรักษ์พล จันทเลิศ	Female	Mixed	14	Mass at mammary gland	Solid mammary gland carcinoma
69	2019	P6223527	2	D19-1686	Feline	ชมพู่	คุณลำปลายมาศ ต่างพันธุ์	Female	Persian	2	Mass at mammary gland	Comedocarcinoma
70	2019	P5628665		CHM149	Canine	ข้าวแตน	คุณนสินี	Female	Mixed	12	Mass at mammary gland	Benign mixed mammary tumor
71	2019	P6223527		D19-0685	Feline	ชมพู่	คุณลำปลายมาศ ต่างพันธุ์	Female	DSH	2	Mass at mammary gland	Simple mammary carcinoma (Tubular type)

## Sheet: Repeat data2
No	Year	HN	Case No	Animal	Pateint name	Owner name	Sex	Breed	Age	Location	Diagnosis
1	2012	P5519189	D12-680	canine	โรบิน	คุณเจตศรันย์ สุวรรณธานี	Female	Miniature	8	Mass at mammary gland	Solid carcinoma
2	2012	P5521271	D12-1567	canine	โบโบ้	คุณพนิตนาฎ นันทขว้าง	Female	Mixed	8	Mass at mammary gland	Malignant mixed tumor
3	2012	P5521271	D12-1290	canine	โบโบ้	คุณพนิตนาฎ นันทขว้าง	Female	Mixed	8	Mass at mammary gland	Tubulopapillary carcinoma
4	2012	P5520505	D12-1008	canine	Pixxy	คุณเพิร์ล วัฒนากุล	Female	Bangkaew	10	Mass at mammary gland	Carcinoma metastasis lymph node
5	2012	P5520505	D12-1007	canine	Pixxy	คุณเพิร์ล วัฒนากุล	Female	Bangkaew	10	Mass at mammary gland	Tubulopapillary carcinoma
6	2013	P5628409	D13-1598	canine	ดุ๊กดิ๊ก	คุณจินต์ บุญยะ	Female	mixed	15	Mass at mammary gland	Simple carcinoma (Solid type)
7	2013	P5623445	D13-113	canine	เข็มทอง	คุณเบญจพร หอมจิตต์	Female	mixed	10	Mass at mammary gland	Fibrosarcoma
8	2013	P5412732	D13-546	canine	จ๊อบเเจ๊บ	คุณกมลวรรณ จันทร์วงษ์	Female	Poodle	9	Mass at mammary gland	Tubulopapillary carcinoma
9	2013	P5628409	D13-1598	canine	ดุ๊กดิ๊ก	คุณจินต์ บุญยะ	Female	mixed	15	Mass at mammary gland	Simple carcinoma (Solid type)
10	2013	P5307245	D13-1202	canine	เจี้ยว	คุณประเสริฐ บุญเรือง	Female	mixed	10	Mass at mammary gland	Malignant mixed tumor
11	2013	P5623445	D13-1249	canine	เข็มทอง	คุณเบญจพร หอมจิตต์	Female	Mongrel	10	Mass at mammary gland	Simple carcinoma (Anaplastic type)
12	2013	P5628284	D13-1525	feline	เเจ๊กการิน	คุณถนิม ฟันเด้นโบการ์ด	Female	mixed	6	Mass at mammary gland	Tubulopapillary carcinoma
13	2013	P5627976	D13-1440	canine	หนูเล็ก	คุณพรพิมล เจริญสุข	Female	mixed	9	Mass at mammary gland	Cystadenocarcinoma
14	2013	P5517531	D13-1475	canine	สีหมอก	คุณบุญเตียม ชนันไชย	Female	GR	10	Mass at mammary gland	complex carcinoma
15	2013	P5414249	D13-1487	canine	ลาล่า	คุณยุคล นิมมานเหมินทร์	Female	LR	11	Mass at mammary gland	Simple carcinoma (Anaplastic type)
16	2013	P5627734	D13-1354	canine	แฟนต้า	คุณวชิรา คำฤทธิ์	Female	Mixed	10	Mass at mammary gland	complex carcinoma
17	2013	P5517531	D13-1475	canine	สีหมอก	คุณบุญเตียม ชนันไชย	Female	GR	10	Mass at mammary gland	complex carcinoma
18	2013	P5414249	D13-1487	canine	ลาล่า	คุณยุคล นิมมานเหมินทร์	Female	LR	11	Mass at mammary gland	Simple carcinoma (Anaplastic type)
19	2013	P5627734	D13-1354	canine	แฟนต้า	คุณวชิรา คำฤทธิ์	Female	Mixed	10	Mass at mammary gland	complex carcinoma
20	2014	P5628284	D14-070	feline	เเจ๊กการิน	คุณถนิม พันเด้น โปการ์ด	Female	DSH	7	Mass at mammary gland	Tubulopapillary carcinoma
21	2014	P5305422	D14-159	canine	ฟอร์ต	คุณวิลาวัลย์ ใจกันทะ	Female	Poodle	10	Mass at mammary gland	Cystadenocarcinoma
22	2014	P5729766	D14-252	canine	เเมมโม้	คุณรุ่งนภา ศักดาทร	Female	Mixed	12	Mass at mammary gland	Simple carcinoma(Solid type)
23	2014	P5302234	D14-082	canine	น้ำตาล	คุณสิริรักษณ์ ศิริเขตต์	Female	Cocker	6	Mass at mammary gland	Benign mixed tumor
24	2014	P5627976	D14-230	canine	หนูเล็ก	คุณพรพิมล เจริญสุข	Female	Poodle	10	Mass at mammary gland	Malignant mixed tumor
25	2014	P5732057	D14-1292	canine	เต้าฮวย	คุณศิริกัญญา ปามา	Female	Mixed	8	Mass at mammary gland	Simple carcinoma (Anaplastic type)
26	2014	P5305422	D14-907	canine	ฟอร์ต	คุณวิลาวัลย์ ใจกันทะ	Female	Poodle	3	Mass at mammary gland	Anaplastic carcinoma
27	2014	P5519910	D14-1955	canine	รถถัง	คุณนงนภัส ยูงพณา	Female	Bull dog	13	Mass at mammary gland	Squamous cell carcinoma
28	2014	P5732057	D14-896	canine	เต้าฮวย	คุณศิริญญา ปามา	Female	Poodle	8	Mass at mammary gland	Myxosarcoma
29	2014	P5411562	D14-2038	canine	ถุงเงิน	คุณสานนท์ นพคุณ	Female	French bulldog	5	Mass at mammary gland	Simple carcinoma(Solid carcinoma)
30	2014	P5735821	D14-2078	canine	เเอบ	คุณจำปา ชัยกาวิล	Female	Mixed	8	Mass at mammary gland	Fibrosarcoma
31	2014	P5411562	D14-2038	canine	ถุงเงิน	คุณสานนท์ นพคุณ	Female	French bulldog	5	Mass at mammary gland	Simple carcinoma(Solid carcinoma)
32	2014	P5735821	D14-2078	canine	เเอบ	คุณจำปา ชัยกาวิล	Female	Mixed	8	Mass at mammary gland	Fibrosarcoma
33	2015	P5519910	D14-1955	Canine	รถถัง	คุณนงนภัส ยูงพณา	Female	Bull dog	13	Mass at mammary gland	Squamous cell carcinoma
34	2015	P5300620	D15-2400	Canine	เเตงกวา	คุณอัจฉริย์ญาณี	Female	Poodle	9	Mass at mammary gland	Simple carcinoma ( Tubulopapillary type)
35	2015	P5628665	D15-2066	Canine	ข้าวเเตน	คุณเข็มเพชร ฮวดสำราญ	Female	Poodle	7	Mass at mammary gland	Benign mixed mammary gland tumor
36	2015	P5841851	D15-1807	Canine	เจ้าหมี	คุณประสิทธิ โพธินาม	Female	Mixed	10	Mass at mammary gland	Fibrosarcoma
37	2015	P5841851	D15-1807	Canine	เจ้าหมี	คุณประสิทธิ โพธินาม	Female	Mixed	10	Mass at mammary gland	Complex carcinoma
38	2015	P5839672	D15-1482	Canine	น้ำหวาน	คุณวิลัย เขาเเท่น	Female	Poodle	11	Mass at mammary gland	Mammary glnad adenoma
39	2015	P5307245	D15-1519	Canine	ไข่เจียว	คุณประเสริฐ บุญเรือง	Female	Poodle	12	Mass at mammary gland	Simple carcinoma ( Tubulopapillary type)
40	2015	P5839672	D15-1007	Canine	น้ำหวาน	คุณวิลัย เขาเเท่น	Female	Poodle	11	Mass at mammary gland	Simple carcinoma ( Tubulopapillary type)
41	2015	P5519189	D15-2807	Canine	โรบิน	คุณเจตศรัญณ์	Female	Miniature	11	Mass at mammary gland	Benign mixed mammary tumor
42	2015	P5729766	D15-1745	Canine	แมมโบ้	คุณรุ่งนภา ศักดาทร	Female	Mixed	13	Mass at mammary gland	Fibrosarcoma
43	2015	P5840431	D15-1246	Canine	แก้ว	คุณอำนวยศักดิ์ สิทธิเสนา	Male	Mixed	7	Mass at mammary gland	Simple carcinoma ( Tubulopapillary type)
44	2015	P5302234	D15-0206	Canine	น้ำตาล	คุณศิริลักษณ์ ศิริเขตต์	Female	Cocker	7	Mass at mammary gland, lymph node	Simple carcinoma ( Tubulopapillary type)
45	2015	P5840431	D15-2067	Canine	แก้ว	คุณอำนวยศักดิ์ สินธิเสนา	Male	Mixed	7	Mass at mammary gland	Solid carcinoma with metastasis in the lymph node
46	2016	P5300620	D16-0248	Canine	เเตงกวา	คุณอัจฉรีย์ญาณี	Female	Poodle	9	Mass at mammary gland	Simple carcinoma ( Solid type)
47	2016	P5950322	D16-2155	Canine	เอาว์ฟี่	คุณเยาวเรศ มูลเมือง	Female	Shitzu	10	Mass at 4th mammary gland	Simple carcinoma ( Solid type)
48	2016	P5950322	D16-2155	Canine	เอาว์ฟี่	คุณเยาวเรศ มูลเมือง	Female	Shitzu	10	Mass at 3rd and 5th mammary gland	Mammary ductal hyperplasia with no evidence of tumor cell
49	2016	P5412732	D16-0454	Canine	จ๊อบเเจ๊บ	คุณรัชนี จันทร์วงษ์	Female	Mixed	12	Mass at mammary gland	Simple carcinoma ( Tubulopapillary type)
50	2016	P5520250	D16-1689	Canine	ถุงเงิน	คุณรุ่งระวี พิณโนเอก	Female	Poodle	9	Mass at the 4th-5th left mammary gland	Simple carcinoma ( Anaplastic type)
51	2016	P5520250	D16-1689	Canine	ถุงเงิน	คุณรุ่งระวี พิณโนเอก	Female	Poodle	9	Mass at the 4th-5th right mammary gland	Simple adenocarcinoma
52	2017	P6003336	D17-1551	Canine	ชิชา	คุณเปลวเทียน ไชยวงศ์	female	Mixed	12	Mass at 3th mammary gland	Simple carcinoma (tubulopapillary type)
53	2017	P6003336	D17-1551	Canine	ชิชา	คุณเปลวเทียน ไชยวงศ์	female	Mixed	12	Mass at 4th mammary gland	Benign mixed mammary gland tumor
54	2017	P6003465	D17-0653	Feline	เบบี้	คุณวนิดา ยาเฟอร์	female	Persian	11	Mass at the mammary gland	Simple carcinoma (tubulopapillary type)
55	2017	P6003465	D17-0653	Feline	เบบี้	คุณวนิดา ยาเฟอร์	female	Persian	11	Mass at the mammary gland	Simple adenoma
56	2017	P5842178	D17-2711	Canine	น้องกล้วยหอม	คุณณัฐวรรณ บุญหมั่น	female	Poodle	11	Mass at mammary gland	Complex carcinoma
57	2018	P5902030	CHM370	Feline	มั่งมี	คุณพรพิมล	Female	DSH	8	Mass at mammary gland	Simple tubular carcinoam grade 2
58	2018	P5842178	CHM141	Canine	น้องกล้วยหอม	คุณณัฐวรรณ บุญหมั่น	Female	Poodle	12	Mass at mammary gland	Solid carcinoma and anaplastic carcinoma Grade 3
59	2018	P6113804	D18-2626	Canine	ครัวซอง	คุณรักษ์พล จันทเลิศ	Female	Cocker Spaniel	14	Mass at mammary gland	Mammary mixed tumor
60	2018	P5841061	D18-1605	Canine	ปุ๊ก	คุณโฉมสุดา หาญศิริชัย	Female	Mixed	12	Mass at mammary gland	Simple carcinoma (Tubulopapillary type)
61	2018	P6118289	D18-1929	Canine	หมูแดง	คุณอัญชลี บุญสุข	Female	Shitzu	12	Mass at mammary gland	Simple mammary carcinoma (Papillary type)
62	2018	P6118289	D18-1929	Canine	หมูแดง	คุณอัญชลี บุญสุข	Female	Shitzu	12	Mass at mammary gland	Simple mammary carcinoma (Tubular type)
63	2018	P6118289	D18-1929	Canine	หมูแดง	คุณอัญชลี บุญสุข	Female	Shitzu	12	Mass at mammary gland	Solid mammary carcinoma
64	2018	P5841061	D18-2024	Canine	ปุ๊ก	คุณโฉมสุดา หาญศิริชัย	Female	Poodle	12	Mass at mammary gland	Simple carcinoma (Tubulopapillary type)
65	2018	P5842178	D18-1044	Canine	น้องกล้วยหอม	คุณสมาน สร้อยสม	Female	Poodle	12	Mass at mammary gland	Complex carcinoma
66	2018	P5842178	D18-1044	Canine	น้องกล้วยหอม	คุณณัฐวรรณ บุญหมั่น	Female	Poodle	12	Mass at mammary gland	Complex carcinoma
67	2019	P5902030	D19-1601	Feline	มั่งมี	คุณนิรมล จินะชิตตรา	Female	DSH	10	Mass at mammary gland	Tubular carcinoma
68	2019	P6113804	D19-0323	Canine	ครัวซอง	คุณรักษ์พล จันทเลิศ	Female	Mixed	14	Mass at mammary gland	Solid mammary gland carcinoma
69	2019	P6223527	D19-1686	Feline	ชมพู่	คุณลำปลายมาศ ต่างพันธุ์	Female	Persian	2	Mass at mammary gland	Comedocarcinoma
70	2019	P5628665	CHM149	Canine	ข้าวแตน	คุณนสินี	Female	DSH	12	Mass at mammary gland	Benign mixed mammary tumor
71	2019	P6223527	D19-0685	Feline	ชมพู่	คุณลำปลายมาศ ต่างพันธุ์	Female	DSH	2	Mass at mammary gland	Simple mammary carcinoma (Tubular type)
