# Supplementary material for: Epidemiology and classification for canine and feline mammary gland tumors: a histopathological survey of 437 mammary gland tumor biopsies performed in a secondary care hospital in Chiang Mai, Thailand from 2012 to 2019
Source: PeerJ. 2024 Mar 15;12:e17077. doi: 10.7717/peerj.17077 (PMC10946389; doi:10.7717/peerj.17077)
Supplement: Supplemental Information 2 [file peerj-12-17077-s002.xlsx]

## Sheet: privot m-cmt
ป้ายชื่อแถว	นับจำนวน ของ No
Carcinoma anaplastic	45
Carcinoma complex	55
Carcinoma in Situ	2
Carcinoma simple:Cystic-papillary carcinoma	11
Carcinoma simple:Tubular carcinoma	11
Carcinoma simple:Tubulo-papillary carcinoma	69
Carcinoma solid	75
Carcinosarcoma	41
Comedocarcinoma	1
Fibrosarcoma	12
Lipid-rich carcinoma	1
Mucinous carcinoma	2
Myxosarcoma	1
Osteosarcoma	5
Spindle cell carcinoma	1
Squamous cell carcinoma	6
Two type of tumors	5
ผลรวมทั้งหมด	343

## Sheet: Malignant CMT
No	Year	Sex	Breed	Age	Classification	Re-classification	Age catagorized	Breed catagorized	Type of tumor
1	2012	Female	Shitzu	9	Simple carcinoma (Solid type)	Carcinoma solid	>8years	Purebred	Malignant
2	2012	Female	Mixed	4	Simple carcinoma (Anaplastic type)	Carcinoma anaplastic	≤8years	Mixed breed	Malignant
3	2012	Female	Poodle	11	Simple carcinoma (Solid type)	Carcinoma solid	>8years	Purebred	Malignant
4	2012	Female	Poodle	9	Tubulopapillary carcinoma	Carcinoma simple:Tubulo-papillary carcinoma	>8years	Purebred	Malignant
5	2012	Female	Dalmecian	13	Tubulopapillary carcinoma	Carcinoma simple:Tubulo-papillary carcinoma	>8years	Purebred	Malignant
6	2012	Female	Poodle	8	Simple carcinoma (Anaplastic type)	Carcinoma anaplastic	≤8years	Purebred	Malignant
7	2012	Female	Poodle	10	Solid carcinoma	Carcinoma solid	>8years	Purebred	Malignant
8	2012	Female	Mixed	10	Complex tubular adenocarcinoma	Carcinoma complex	>8years	Mixed breed	Malignant
9	2012	Female	Shitzu	10	Malignant mixed tumor	Carcinosarcoma	>8years	Purebred	Malignant
10	2012	Female	Mixed	9	Complex carcinoma	Carcinoma complex	>8years	Mixed breed	Malignant
11	2012	Female	Poodle	11	Complex carcinoma	Carcinoma complex	>8years	Purebred	Malignant
12	2012	Female	Mixed	8	Malignant mixed tumor	Carcinosarcoma	≤8years	Mixed breed	Malignant
13	2012	Female	Mixed	12	Tubulopapillary carcinoma	Carcinoma simple:Tubulo-papillary carcinoma	>8years	Mixed breed	Malignant
14	2012	Female	Mixed	8	Malignant mixed tumor	Carcinosarcoma	≤8years	Mixed breed	Malignant
15	2012	Female	Mixed	10	Tubulopapillary carcinoma	Carcinoma simple:Tubulo-papillary carcinoma	>8years	Mixed breed	Malignant
16	2012	Female	Mixed	6	Solid carcinoma	Carcinoma solid	≤8years	Mixed breed	Malignant
17	2012	Female	Mixed	15	Solid carcinoma	Carcinoma solid	>8years	Mixed breed	Malignant
18	2012	Female	Mixed	14	Solid carcinoma	Carcinoma solid	>8years	Mixed breed	Malignant
19	2012	Female	Mixed	5	Complex solid carcinoma	Carcinoma complex	≤8years	Mixed breed	Malignant
20	2012	Female	Mixed	17	Solid carcinoma	Carcinoma solid	>8years	Mixed breed	Malignant
21	2012	Female	Poodle	15	Simple carcinoma (Anaplastic type)	Carcinoma anaplastic	>8years	Purebred	Malignant
22	2012	Female	Cocker	8	Simple carcinoma (Solid type)	Carcinoma solid	≤8years	Purebred	Malignant
23	2012	Male	Mixed	7	Simple carcinoma (Anaplastic type)	Carcinoma anaplastic	≤8years	Mixed breed	Malignant
24	2012	Female	Poodle	8	Malignant mixed tumor	Carcinosarcoma	≤8years	Purebred	Malignant
25	2012	Female	Mixed	12	Tubulopapillary carcinoma	Carcinoma simple:Tubulo-papillary carcinoma	>8years	Mixed breed	Malignant
26	2012	Female	Miniature	8	Solid carcinoma	Carcinoma solid	≤8years	Purebred	Malignant
27	2012	Female	Cocker	8	Solid carcinoma	Carcinoma solid	≤8years	Purebred	Malignant
28	2012	Female	Poodle	7	Mucinous carcinoma	Mucinous carcinoma	≤8years	Purebred	Malignant
29	2012	Female	Mixed	7	Complex carcinoma	Carcinoma complex	≤8years	Mixed breed	Malignant
30	2012	Female	Poodle	10	Complex carcinoma	Carcinoma complex	>8years	Purebred	Malignant
31	2012	Female	Rottweiler	7	Simple carcinoma (Anaplastic type)	Carcinoma anaplastic	≤8years	Purebred	Malignant
32	2012	Female	Miniature	10	Malignant mixed tumor	Carcinosarcoma	>8years	Purebred	Malignant
33	2012	Female	Mixed	9	Tubulopapillary carcinoma	Carcinoma simple:Tubulo-papillary carcinoma	>8years	Mixed breed	Malignant
34	2012	Female	Mixed	8	Malignant mixed tumor	Carcinosarcoma	≤8years	Mixed breed	Malignant
35	2012	Female	Mixed	9	Tubulopapillary carcinoma	Carcinoma simple:Tubulo-papillary carcinoma	>8years	Mixed breed	Malignant
36	2012	Female	Mixed	10	Simple adenocarcinoma (Tubulopapillary type)	Carcinoma simple:Tubulo-papillary carcinoma	>8years	Mixed breed	Malignant
37	2012	Female	Mixed	10	Malignant mixed tumor	Carcinosarcoma	>8years	Mixed breed	Malignant
38	2012	Female	Mixed	8	Tubulopapillary carcinoma	Carcinoma simple:Tubulo-papillary carcinoma	≤8years	Mixed breed	Malignant
39	2012	Female	Mixed	10	Malignant mixed tumor	Carcinosarcoma	>8years	Mixed breed	Malignant
40	2012	Female	Miniature	10	Simple carcinoma (Solid carcinoma)	Carcinoma solid	>8years	Purebred	Malignant
41	2012	Female	Poodle	7	Malignant mixed tumor	Carcinosarcoma	≤8years	Purebred	Malignant
42	2012	Female	Mixed	8	Simple carcinoma (Anaplastic type)	Carcinoma anaplastic	≤8years	Mixed breed	Malignant
43	2012	Female	Mixed	12	Simple carcinoma (Anaplastic type)	Carcinoma anaplastic	>8years	Mixed breed	Malignant
44	2012	Female	Mixed	5	Carcinosarcoma	Carcinosarcoma	≤8years	Mixed breed	Malignant
45	2012	Female	Mixed	11	Simple carcinoma (Anaplastic type)	Carcinoma anaplastic	>8years	Mixed breed	Malignant
46	2012	Female	GR	10	Malignant mixed mammary gland tumor	Carcinosarcoma	>8years	Purebred	Malignant
47	2012	Female	Bangkaew	10	Tubulopapillary carcinoma	Carcinoma simple:Tubulo-papillary carcinoma	>8years	Purebred	Malignant
48	2012	Female	GR	9	Fibrosarcoma	Fibrosarcoma	>8years	Purebred	Malignant
49	2012	Female	Mixed	6	Tubulopapillary carcinoma	Carcinoma simple:Tubulo-papillary carcinoma	≤8years	Mixed breed	Malignant
50	2012	Female	mixed	10	Tubulopapillary carcinoma	Carcinoma simple:Tubulo-papillary carcinoma	>8years	Mixed breed	Malignant
51	2013	Female	Mixed	9	Simple carcinoma (Solid carcinoma)	Carcinoma solid	>8years	Mixed breed	Malignant
52	2013	Female	Poodle	16	Simple carcinoma (Solid carcinoma)	Carcinoma solid	>8years	Purebred	Malignant
53	2013	Female	Poodle	10	Malignant mixed tumor	Carcinosarcoma	>8years	Purebred	Malignant
54	2013	Female	mixed	9	Malignant mixed tumor	Carcinosarcoma	>8years	Mixed breed	Malignant
55	2013	Female	Poodle	10	Simple carcinoma (Tubulopapillary carcinoma)	Carcinoma simple:Tubulo-papillary carcinoma	>8years	Purebred	Malignant
56	2013	Female	Mixed	10	Tubulopapillary carcinoma	Carcinoma simple:Tubulo-papillary carcinoma	>8years	Mixed breed	Malignant
57	2013	Female	Poodle	11	complex carcinoma	Carcinoma complex	>8years	Purebred	Malignant
58	2013	Female	GR	10	malignant mixed mammary glant tumor	Carcinosarcoma	>8years	Purebred	Malignant
59	2013	Female	Poodle	13	Tubulopapillary carcinoma	Carcinoma simple:Tubulo-papillary carcinoma	>8years	Purebred	Malignant
60	2013	Female	mixed	15	Simple carcinoma (Solid type)	Carcinoma solid	>8years	Mixed breed	Malignant
61	2013	Female	mixed	12	Solid carcinoma	Carcinoma solid	>8years	Mixed breed	Malignant
62	2013	Female	mixed	10	Solid carcinoma	Carcinoma solid	>8years	Mixed breed	Malignant
63	2013	Female	mixed	4	Mucinous adenocarcinoma	Mucinous carcinoma	≤8years	Mixed breed	Malignant
64	2013	Female	Pekingese	11	complex carcinoma	Carcinoma complex	>8years	Purebred	Malignant
65	2013	Female	Mixed	4	Simple carcinoma (Solid carcinoma)	Carcinoma solid	≤8years	Mixed breed	Malignant
66	2013	Female	mixed	10	complex carcinoma	Carcinoma complex	>8years	Mixed breed	Malignant
67	2013	Female	mixed	5	Simple carcinoma (Anaplastic type)	Carcinoma anaplastic	≤8years	Mixed breed	Malignant
68	2013	Female	mixed	7	Mixed mammary gland tumor	Carcinosarcoma	≤8years	Mixed breed	Malignant
69	2013	Female	mixed	15	Anaplastic carcinoma	Carcinoma anaplastic	>8years	Mixed breed	Malignant
70	2013	Female	mixed	10	Solid carcinoma	Carcinoma solid	>8years	Mixed breed	Malignant
71	2013	Female	Cocker	9	Mixed mammary gland tumor	Carcinosarcoma	>8years	Purebred	Malignant
72	2013	Female	mixed	10	Fibrosarcoma	Fibrosarcoma	>8years	Mixed breed	Malignant
73	2013	Female	mixed	10	Anaplastic carcinoma	Carcinoma anaplastic	>8years	Mixed breed	Malignant
74	2013	Female	mixed	10	complex carcinoma	Carcinoma complex	>8years	Mixed breed	Malignant
75	2013	Female	LR	9	Tubulopapillary carcinoma	Carcinoma simple:Tubulo-papillary carcinoma	>8years	Purebred	Malignant
76	2013	Female	Chihuahua	14	complex carcinoma	Carcinoma complex	>8years	Purebred	Malignant
77	2013	Female	mixed	6	Simple carcinoma (Solid type)	Carcinoma solid	≤8years	Mixed breed	Malignant
78	2013	Female	mixed	6	Malignant mixed tumor	Carcinosarcoma	≤8years	Mixed breed	Malignant
79	2013	Female	Poodle	8	Malignant mixed tumor	Carcinosarcoma	≤8years	Purebred	Malignant
80	2013	Female	Beagle	8	Simple adenocarcinoma (Tubulopapillary type)	Carcinoma simple:Tubulo-papillary carcinoma	≤8years	Purebred	Malignant
81	2013	Female	Mixed	14	fibrosarcoma	fibrosarcoma	>8years	Mixed breed	Malignant
82	2013	Female	Mixed	10	Mixed mammary gland tumor	Carcinosarcoma	>8years	Mixed breed	Malignant
83	2013	Female	pug	7	Tubulopapillary carcinoma	Carcinoma simple:Tubulo-papillary carcinoma	≤8years	Purebred	Malignant
84	2013	Female	mixed	11	complex carcinoma	Carcinoma complex	>8years	Mixed breed	Malignant
85	2013	Female	Poodle	10	Tubulopapillary carcinoma	Carcinoma simple:Tubulo-papillary carcinoma	>8years	Purebred	Malignant
86	2013	Female	Poodle	9	malignant mixed mammary glant tumor	Carcinosarcoma	>8years	Purebred	Malignant
87	2013	Female	Poodle	9	Tubulopapillary carcinoma	Carcinoma simple:Tubulo-papillary carcinoma	>8years	Purebred	Malignant
88	2013	Female	mixed	13	complex carcinoma	Carcinoma complex	>8years	Mixed breed	Malignant
89	2013	Female	mixed	13	Solid carcinoma	Carcinoma solid	>8years	Mixed breed	Malignant
90	2013	Female	mixed	15	Simple carcinoma (Solid type)	Carcinoma solid	>8years	Mixed breed	Malignant
91	2013	Female	Poodle	10	Solid carcinoma (Complex type)	Carcinoma solid	>8years	Purebred	Malignant
92	2013	Female	mixed	8	Tubulopapillary carcinoma	Carcinoma simple:Tubulo-papillary carcinoma	≤8years	Mixed breed	Malignant
93	2013	Female	Poodle	16	Simple carcinoma (Solid carcinoma)	Carcinoma solid	>8years	Purebred	Malignant
94	2013	Female	Poodle	10	Osteosarcoma	Osteosarcoma	>8years	Purebred	Malignant
95	2013	Female	mixed	9	Simple carcinoma (Anaplastic type)	Carcinoma anaplastic	>8years	Mixed breed	Malignant
96	2013	Female	mixed	10	Squamous cell carcinoma	Squamous cell carcinoma	>8years	Mixed breed	Malignant
97	2013	Female	mixed	10	Malignant mixed tumor	Carcinosarcoma	>8years	Mixed breed	Malignant
98	2013	Female	mixed	10	Simple carcinoma (Anaplastic type)	Carcinoma anaplastic	>8years	Mixed breed	Malignant
99	2013	Female	GR	11	Tubulopapillary carcinoma	Carcinoma simple:Tubulo-papillary carcinoma	>8years	Purebred	Malignant
100	2013	Female	mixed	14	Simple carcinoma (Anaplastic type)	Carcinoma anaplastic	>8years	Mixed breed	Malignant
101	2013	Female	Poodle	16	Simple carcinoma (Anaplastic type)	Carcinoma anaplastic	>8years	Purebred	Malignant
102	2013	Male	mixed	11	Simple carcinoma (Anaplastic type)	Carcinoma anaplastic	>8years	Mixed breed	Malignant
103	2013	Female	mixed	6	complex carcinoma	Carcinoma complex	≤8years	Mixed breed	Malignant
104	2013	Female	mixed	10	Tubulopapillary carcinoma	Carcinoma simple:Tubulo-papillary carcinoma	>8years	Mixed breed	Malignant
105	2013	Female	Poodle	9	Cystadenocarcinoma	Carcinoma simple:Cystic-papillary carcinoma	>8years	Purebred	Malignant
106	2013	Female	GR	7	Cystadenocarcinoma	Carcinoma simple:Cystic-papillary carcinoma	≤8years	Purebred	Malignant
107	2013	Female	GR	10	complex carcinoma	Carcinoma complex	>8years	Purebred	Malignant
108	2013	Female	LR	11	Simple carcinoma (Anaplastic type)	Carcinoma anaplastic	>8years	Purebred	Malignant
109	2013	Female	Mixed	10	complex carcinoma	Carcinoma complex	>8years	Mixed breed	Malignant
110	2013	Female	GR	10	complex carcinoma	Carcinoma complex	>8years	Purebred	Malignant
111	2013	Female	LR	11	Simple carcinoma (Anaplastic type)	Carcinoma anaplastic	>8years	Purebred	Malignant
112	2013	Female	Mixed	10	complex carcinoma	Carcinoma complex	>8years	Mixed breed	Malignant
113	2014	Female	mixed	15	Simple carcinoma (Anaplastic type) with sclerosis	Carcinoma anaplastic	>8years	Mixed breed	Malignant
114	2014	Female	Mixed	10	Simple carcinoma(Tubulopapillary type)	Carcinoma simple:Tubulo-papillary carcinoma	>8years	Mixed breed	Malignant
115	2014	Female	Poodle	3	Cystadenocarcinoma	Carcinoma simple:Cystic-papillary carcinoma	≤8years	Purebred	Malignant
116	2014	Female	Mixed	12	Simple carcinoma(Solid type)	Carcinoma solid	>8years	Mixed breed	Malignant
117	2014	Female	GR	10	Simple carcinoma(Solid type)	Carcinoma solid	>8years	Purebred	Malignant
118	2014	Female	Shitzu	11	Simple carcinoma(Solid type)	Carcinoma solid	>8years	Purebred	Malignant
119	2014	Female	Mixed	10	Simple carcinoma(Solid type)	Carcinoma solid	>8years	Mixed breed	Malignant
120	2014	Female	Poodle	10	Malignant mixed tumor	Carcinosarcoma	>8years	Purebred	Malignant
121	2014	Female	Mixed	5	Fibrosarcoma	Fibrosarcoma	≤8years	Mixed breed	Malignant
122	2014	Female	Pomeranian	9	Carcinoma in Situ	Carcinoma in Situ	>8years	Purebred	Malignant
123	2014	Female	Mixed	12	Simple carcinoma(Solid type)	Carcinoma solid	>8years	Mixed breed	Malignant
124	2014	Female	Mixed	8	Simple carcinoma (Anaplastic type)	Carcinoma anaplastic	≤8years	Mixed breed	Malignant
125	2014	Female	Mixed	12	Squamous cell carcinoma	Squamous cell carcinoma	>8years	Mixed breed	Malignant
126	2014	Female	Shitzu	17	Simple carcinoma(Tubulopapillary type)	Carcinoma simple:Tubulo-papillary carcinoma	>8years	Purebred	Malignant
127	2014	Female	Poodle	6	Simple carcinoma (Anaplastic type)	Carcinoma anaplastic	≤8years	Purebred	Malignant
128	2014	Female	Mixed	10	Complex adenocarcinoma	Carcinoma complex	>8years	Mixed breed	Malignant
129	2014	Female	Poodle	10	Complex carcinoma	Carcinoma complex	>8years	Purebred	Malignant
130	2014	Female	Poodle	10	Simple carcinoma(Tubulopapillary type)	Carcinoma simple:Tubulo-papillary carcinoma	>8years	Purebred	Malignant
131	2014	Female	Poodle	3	Anaplastic carcinoma	Carcinoma anaplastic	≤8years	Purebred	Malignant
132	2014	Female	Mixed	6	Simple carcinoma(Solid type)	Carcinoma solid	≤8years	Mixed breed	Malignant
133	2014	Female	Pug	11	Complex carcinoma	Carcinoma complex	>8years	Purebred	Malignant
134	2014	Female	Poodle	9	Simple carcinoma(Solid type)	Carcinoma solid	>8years	Purebred	Malignant
135	2014	Female	Cocker	10	Simple carcinoma (Anaplastic type)	Carcinoma anaplastic	>8years	Purebred	Malignant
136	2014	Female	Mixed	9	Malignant mixed tumor	Carcinosarcoma	>8years	Mixed breed	Malignant
137	2014	Female	Shitzu	14	Tubulopapillary carcinoma	Carcinoma simple:Tubulo-papillary carcinoma	>8years	Purebred	Malignant
138	2014	Female	Bull dog	13	Squamous cell carcinoma	Squamous cell carcinoma	>8years	Purebred	Malignant
139	2014	Female	Mixed	15	Simple carcinoma (Anaplastic type)	Carcinoma anaplastic	>8years	Mixed breed	Malignant
140	2014	Female	Poodle	14	Complex carcinoma	Carcinoma complex	>8years	Purebred	Malignant
141	2014	Female	Mixed	10	Cystadenocarcinoma	Carcinoma simple:Cystic-papillary carcinoma	>8years	Mixed breed	Malignant
142	2014	Female	Mixed	5	Simple carcinoma(Solid type)	Carcinoma solid	≤8years	Mixed breed	Malignant
143	2014	Female	Poodle	7	Simple carcinoma(Tubulopapillary type)	Carcinoma simple:Tubulo-papillary carcinoma	≤8years	Purebred	Malignant
144	2014	Female	Poodle	13	Simple carcinoma(Tubulopapillary type)	Carcinoma simple:Tubulo-papillary carcinoma	>8years	Purebred	Malignant
145	2014	Female	Mixed	10	Tubulopapillary carcinoma	Carcinoma simple:Tubulo-papillary carcinoma	>8years	Mixed breed	Malignant
146	2014	Female	Shitzu	11	Simple carcinoma (Anaplastic type)	Carcinoma anaplastic	>8years	Purebred	Malignant
147	2014	Female	Yorkshire Terrier	11	Simple carcinoma(Solid type)	Carcinoma solid	>8years	Purebred	Malignant
148	2014	Female	Poodle	5	Complex carcinoma	Carcinoma complex	≤8years	Purebred	Malignant
149	2014	Female	Poodle	8	Myxosarcoma	Myxosarcoma	≤8years	Purebred	Malignant
150	2014	Female	Mixed	10	Tubulopapillary carcinoma	Carcinoma simple:Tubulo-papillary carcinoma	>8years	Mixed breed	Malignant
151	2014	Female	Poodle	7	Complex carcinoma	Carcinoma complex	≤8years	Purebred	Malignant
152	2014	Female	mixed	5	Simple carcinoma (Anaplastic type)	Carcinoma anaplastic	≤8years	Mixed breed	Malignant
153	2014	Female	French bulldog	5	Simple carcinoma(Solid carcinoma)	Carcinoma solid	≤8years	Purebred	Malignant
154	2014	Female	Mixed	8	Fibrosarcoma	Fibrosarcoma	≤8years	Mixed breed	Malignant
155	2014	Female	Mixed	8	Fibrosarcoma	Fibrosarcoma	≤8years	Mixed breed	Malignant
156	2014	Female	Poodle	14	Simple carcinoma (Anaplastic type)	Carcinoma anaplastic	>8years	Purebred	Malignant
157	2015	Female	Bangkaew	12	Simple carinoma (Solid type)	Carcinoma solid	>8years	Purebred	Malignant
158	2015	Female	Bull dog	13	Squamous cell carcinoma	Squamous cell carcinoma	>8years	Purebred	Malignant
159	2015	Female	Shitzu	15	Simple carcinoma ( Tubulopapillary type)	Carcinoma simple:Tubulo-papillary carcinoma	>8years	Purebred	Malignant
160	2015	Female	Mixed	15	Spindle cell carcinoma	Spindle cell carcinoma	>8years	Mixed breed	Malignant
161	2015	Female	Cocker	10	Complex carcinoma	Carcinoma complex	>8years	Purebred	Malignant
162	2015	Female	Poodle	8	Tubulopapillary carcinoma	Carcinoma simple:Tubulo-papillary carcinoma	≤8years	Purebred	Malignant
163	2015	Female	Poodle	10	Complex carcinoma	Carcinoma complex	>8years	Purebred	Malignant
164	2015	Female	LR	10	Squamous cell carcinoma	Squamous cell carcinoma	>8years	Purebred	Malignant
165	2015	Female	Poodle	9	Simple carcinoma ( Tubulopapillary type)	Carcinoma simple:Tubulo-papillary carcinoma	>8years	Purebred	Malignant
166	2015	Female	Mixed	4	Simple carinoma (Solid type)	Carcinoma solid	≤8years	Mixed breed	Malignant
167	2015	Female	Mixed	12	Simple carinoma (Solid type)	Carcinoma solid	>8years	Mixed breed	Malignant
168	2015	Female	Mixed	15	Simple carcinoma ( Tubulopapillary type)	Carcinoma simple:Tubulo-papillary carcinoma	>8years	Mixed breed	Malignant
169	2015	Female	Shitzu	15	Simple carinoma (Solid type)	Carcinoma solid	>8years	Purebred	Malignant
170	2015	Female	Mixed	10	Fibrosarcoma	Fibrosarcoma	>8years	Mixed breed	Malignant
171	2015	Female	Mixed	10	Complex carcinoma	Carcinoma complex	>8years	Mixed breed	Malignant
172	2015	Female	Shitzu	9	Simple carcinoma ( Tubulopapillary type)	Carcinoma simple:Tubulo-papillary carcinoma	>8years	Purebred	Malignant
173	2015	Female	mixed	8	Simple carinoma (Solid type)	Carcinoma solid	≤8years	Mixed breed	Malignant
174	2015	Female	Cocker	10	Simple carcinoma (Anaplastic type)	Carcinoma anaplastic	>8years	Purebred	Malignant
175	2015	Female	Cocker	11	Mixed mammary gland tumor	Carcinosarcoma	>8years	Purebred	Malignant
176	2015	Male	Poodle	15	Complex carcinoma	Carcinoma complex	>8years	Purebred	Malignant
177	2015	Female	GR	6	Simple carcinoma (cystic-papillary type)	Carcinoma simple:Cystic-papillary carcinoma	≤8years	Purebred	Malignant
178	2015	Female	Poodle	9	Cysadenocarcinoma	Carcinoma simple:Cystic-papillary carcinoma	>8years	Purebred	Malignant
179	2015	Female	Poodle	12	Simple carcinoma ( Tubulopapillary type)	Carcinoma simple:Tubulo-papillary carcinoma	>8years	Purebred	Malignant
180	2015	Female	Mixed	9	Tubulopapillary carcinoma	Carcinoma simple:Tubulo-papillary carcinoma	>8years	Mixed breed	Malignant
181	2015	Female	Poodle	10	Complex carcinoma	Carcinoma complex	>8years	Purebred	Malignant
182	2015	Female	Poodle	10	Simple carcinoma ( Tubulopapillary type)	Carcinoma simple:Tubulo-papillary carcinoma	>8years	Purebred	Malignant
183	2015	Female	Poodle	11	Simple carcinoma ( Tubulopapillary type)	Carcinoma simple:Tubulo-papillary carcinoma	>8years	Purebred	Malignant
184	2015	Male	Pit Bull	5	Simple carcinoma ( Tubulopapillary type)	Carcinoma simple:Tubulo-papillary carcinoma	≤8years	Purebred	Malignant
185	2015	Female	LR	7	Simple carcinoma ( Tubulopapillary type)	Carcinoma simple:Tubulo-papillary carcinoma	≤8years	Purebred	Malignant
186	2015	Female	Mixed	13	Fibrosarcoma	Fibrosarcoma	>8years	Mixed breed	Malignant
187	2015	Male	Mixed	7	Simple carcinoma ( Tubulopapillary type)	Carcinoma simple:Tubulo-papillary carcinoma	≤8years	Mixed breed	Malignant
188	2015	Female	Poodle	12	Simple carcinoma ( Tubulopapillary type)	Carcinoma simple:Tubulo-papillary carcinoma	>8years	Purebred	Malignant
189	2015	Male	Mixed	10	Simple carcinoma (Solid type)	Carcinoma solid	>8years	Mixed breed	Malignant
190	2015	Female	Cocker	9	Fibrosarcoma	Fibrosarcoma	>8years	Purebred	Malignant
191	2015	Female	Poodle	9	Malignant mixed tumor	Carcinosarcoma	>8years	Purebred	Malignant
192	2015	Female	Cocker	9	Simple carcinoma (Solid type)	Carcinoma solid	>8years	Purebred	Malignant
193	2015	Female	Shitzu	13	Simple carcinoma (Solid type)	Carcinoma solid	>8years	Purebred	Malignant
194	2015	Female	Poodle	15	Simple carcinoma (Solid type)	Carcinoma solid	>8years	Purebred	Malignant
195	2014	Female	Mixed	6	Complex carcinoma	Carcinoma complex	≤8years	Mixed breed	Malignant
196	2015	Female	Bangkaew	10	Simple carcinoma (Anaplastic type)	Carcinoma anaplastic	>8years	Purebred	Malignant
197	2015	Female	Shitzu	12	Complex adenocarcinoma	Carcinoma complex	>8years	Purebred	Malignant
198	2015	Female	Mixed	13	Simple carcinoma (Anaplastic type)	Carcinoma anaplastic	>8years	Mixed breed	Malignant
199	2015	Female	Poodle	12	Cysadenocarcinoma	Carcinoma simple:Cystic-papillary carcinoma	>8years	Purebred	Malignant
200	2015	Female	Poodle	10	Lipid-rich mammary carcinoma with lymph node metastasis	Lipid-rich carcinoma	>8years	Purebred	Malignant
201	2015	Female	GR	7	Simple carcinoma (Solid type)	Carcinoma solid	≤8years	Purebred	Malignant
202	2015	Female	Mixed	14	Simple carcinoma ( Tubulopapillary type)	Carcinoma simple:Tubulo-papillary carcinoma	>8years	Mixed breed	Malignant
203	2015	Male	GR	8	Simple carcinoma (Anaplastic type)	Carcinoma anaplastic	≤8years	Purebred	Malignant
204	2015	Female	Shitzu	15	Malignant mixed mammary gland tumor	Carcinosarcoma	>8years	Purebred	Malignant
205	2015	Female	Cocker	7	Simple carcinoma ( Tubulopapillary type)	Carcinoma simple:Tubulo-papillary carcinoma	≤8years	Purebred	Malignant
206	2015	Female	Spitz	5	Simple carinoma (Solid type)	Carcinoma solid	≤8years	Purebred	Malignant
207	2015	Female	GR	7	Fibrosarcoma	Fibrosarcoma	≤8years	Purebred	Malignant
208	2015	Male	Mixed	7	Solid carcinoma with metastasis in the lymph node	Carcinoma solid	≤8years	Mixed breed	Malignant
209	2015	Female	Shitzu	6	Simple carcinoma (Solid type)	Carcinoma solid	≤8years	Purebred	Malignant
210	2015	Female	Cocker	11	Simple carinoma (Solid type)	Carcinoma solid	>8years	Purebred	Malignant
211	2015	Female	Shitzu	14	Cystadenocarcinoma	Carcinoma simple:Cystic-papillary carcinoma	>8years	Purebred	Malignant
212	2015	Female	Mixed	10	Simple tubular adenocarcinoma	Carcinoma simple:Tubular carcinoma	>8years	Mixed breed	Malignant
213	2016	Female	Siberian Husky	13	Simple carcinoma ( Tubulopapillary type)	Carcinoma simple:Tubulo-papillary carcinoma	>8years	Purebred	Malignant
214	2016	Female	Mixed	10	Simple carcinoma ( Tubulopapillary type)	Carcinoma simple:Tubulo-papillary carcinoma	>8years	Mixed breed	Malignant
215	2016	Female	Siberian Husky	8	Simple carcinoma ( Tubulopapillary type)	Carcinoma simple:Tubulo-papillary carcinoma	≤8years	Purebred	Malignant
216	2016	Female	Mixed	10	Simple carcinoma ( Tubulopapillary type)	Carcinoma simple:Tubulo-papillary carcinoma	>8years	Mixed breed	Malignant
217	2016	Female	Poodle	10	Benign mixed mammary gland tumor, Osteosarcoma	Two type of tumors	>8years	Purebred	Malignant
218	2016	Female	Mixed	8	Osteosarcoma	Osteosarcoma	≤8years	Mixed breed	Malignant
219	2016	Female	Mixed	15	Simple carcinoma ( Solid type)	Carcinoma solid	>8years	Mixed breed	Malignant
220	2016	Female	GR	11	Simple carcinoma ( Solid type)	Carcinoma solid	>8years	Purebred	Malignant
221	2016	Female	Mixed	9	Simple carcinoma ( Solid type)	Carcinoma solid	>8years	Mixed breed	Malignant
222	2016	Female	Mixed	14	Complex carcinoma, Mixed mammary gland tumor	Two type of tumors	>8years	Mixed breed	Malignant
223	2016	Female	Shitzu	11	Simple carcinoma (anaplastic type)	Carcinoma anaplastic	>8years	Purebred	Malignant
224	2016	Female	Spitz	12	Simple carcinoma ( Solid type) with cyst	Carcinoma solid	>8years	Purebred	Malignant
225	2016	Female	Shitzu	4	Mixed mammary gland tumor	Carcinosarcoma	≤8years	Purebred	Malignant
226	2016	Female	Mixed	9	Simple carcinoma ( Solid type)	Carcinoma solid	>8years	Mixed breed	Malignant
227	2016	Female	Mixed	10	Fibrosarcoma	Fibrosarcoma	>8years	Mixed breed	Malignant
228	2016	Female	Poodle	10	Simple adenocarcinoma (Tubulopapillary type)	Carcinoma simple:Tubulo-papillary carcinoma	>8years	Purebred	Malignant
229	2016	Female	Poodle	10	Simple carcinoma ( Tubulopapillary type)	Carcinoma simple:Tubulo-papillary carcinoma	>8years	Purebred	Malignant
230	2016	Female	Mixed	14	Complex carcinoma was highly suspected	Carcinoma complex	>8years	Mixed breed	Malignant
231	2016	Female	Mixed	14	Mixed mammary gland tumor	Carcinosarcoma	>8years	Mixed breed	Malignant
232	2016	Female	Chihuahua	11	Simple carcinoma ( Solid type)	Carcinoma solid	>8years	Purebred	Malignant
233	2016	Female	Poodle	9	Simple carcinoma ( Solid type)	Carcinoma solid	>8years	Purebred	Malignant
234	2016	Female	Chow Chow	10	Mixed mammary gland tumor	Carcinosarcoma	>8years	Purebred	Malignant
235	2016	Female	Shitzu	10	Simple carcinoma ( Solid type)	Carcinoma solid	>8years	Purebred	Malignant
236	2016	Female	Mixed	10	Complex carcinoma	Carcinoma complex	>8years	Mixed breed	Malignant
237	2016	Female	Poodle	3	Mixed mammary gland tumor	Carcinosarcoma	≤8years	Purebred	Malignant
238	2016	Female	Mixed	10	Simple carcinoma ( Solid type)	Carcinoma solid	>8years	Mixed breed	Malignant
239	2016	Female	Mixed	10	Simple carcinoma ( Solid type)	Carcinoma solid	>8years	Mixed breed	Malignant
240	2016	Female	Mixed	12	Simple carcinoma ( Solid type)	Carcinoma solid	>8years	Mixed breed	Malignant
241	2016	Female	Shitzu	3	Complex carcinoma	Carcinoma complex	≤8years	Purebred	Malignant
242	2016	Female	Yorkshire	10	Simple carcinoma ( Solid type)	Carcinoma solid	>8years	Purebred	Malignant
243	2016	Female	Mixed	15	Simple carcinoma ( Anaplastic type) with inguinal lymph node metastasis	Carcinoma anaplastic	>8years	Mixed breed	Malignant
244	2016	Female	Mixed	14	Simple carcinoma ( Solid type)	Carcinoma solid	>8years	Mixed breed	Malignant
245	2016	Female	Shitzu	12	Simple carcinoma (Tubulopapillary carcinoma)	Carcinoma simple:Tubulo-papillary carcinoma	>8years	Purebred	Malignant
246	2016	Female	Shitzu	10	Simple carcinoma (Solid type)	Carcinoma solid	>8years	Purebred	Malignant
247	2016	Female	Shitzu	13	Simple carcinoma (anaplastic carcinoma)	Carcinoma anaplastic	>8years	Purebred	Malignant
248	2016	Female	Mixed	12	Complex carcinoma	Carcinoma complex	>8years	Mixed breed	Malignant
249	2016	Female	Poodle	6	Complex carcinoma	Carcinoma complex	≤8years	Purebred	Malignant
250	2016	Female	Mixed	12	Complex carcinoma	Carcinoma complex	>8years	Mixed breed	Malignant
251	2016	Female	Mixed	12	Simple carcinoma ( Tubulopapillary type)	Carcinoma simple:Tubulo-papillary carcinoma	>8years	Mixed breed	Malignant
252	2016	Female	Cocker Spaniel	10	Noninfiltrating(in Situ) carcinomas	Carcinoma in Situ	>8years	Purebred	Malignant
253	2016	Female	Poodle	9	Simple carcinoma ( Anaplastic type)	Carcinoma anaplastic	>8years	Purebred	Malignant
254	2016	Female	Poodle	9	Simple adenocarcinoma (Tubulopapillary type)	Carcinoma simple:Tubulo-papillary carcinoma	>8years	Purebred	Malignant
255	2017	female	shitzu	7	complex carcinoma	Carcinoma complex	≤8years	Purebred	Malignant
256	2017	female	Mixed	14	Simple carcinoma (Solid pattern, tubulopapillary pattern)	Two type of tumors	>8years	Mixed breed	Malignant
257	2017	female	Mixed	13	Simple carcinoma (Solid type)	Carcinoma solid	>8years	Mixed breed	Malignant
258	2017	female	Shitzu	9	Simple carcinoma (tubulopapillary type)	Carcinoma simple:Tubulo-papillary carcinoma	>8years	Purebred	Malignant
259	2017	female	Siberian	9	Simple carcinoma (tubulopapillary type)	Carcinoma simple:Tubulo-papillary carcinoma	>8years	Purebred	Malignant
260	2017	female	Yorkshire	7	Simple carcinoma (tubulopapillary type)	Carcinoma simple:Tubulo-papillary carcinoma	≤8years	Purebred	Malignant
261	2017	female	Shitzu	10	Complex carcinoma	Carcinoma complex	>8years	Purebred	Malignant
262	2017	Female	Mixed	14	Simple carcinoma (tubulopapillary type)	Carcinoma simple:Tubulo-papillary carcinoma	>8years	Mixed breed	Malignant
263	2017	female	Poodle	10	Simple carcinoma (tubulopapillary type)	Carcinoma simple:Tubulo-papillary carcinoma	>8years	Purebred	Malignant
264	2017	female	Mixed	10	Complex carcinoma	Carcinoma complex	>8years	Mixed breed	Malignant
265	2017	female	Mixed	9	Complex carcinoma	Carcinoma complex	>8years	Mixed breed	Malignant
266	2017	female	Mixed	12	Simple carcinoma (tubulopapillary type)	Carcinoma simple:Tubulo-papillary carcinoma	>8years	Mixed breed	Malignant
267	2017	female	Mixed	9	Mixed mammary gland tumor	Carcinosarcoma	>8years	Mixed breed	Malignant
268	2017	female	Pug	10	Simple carcinoma (Solid type)	Carcinoma solid	>8years	Purebred	Malignant
269	2017	female	Mixed	10	Squamous cell carcinoma (SCC)	Squamous cell carcinoma	>8years	Mixed breed	Malignant
270	2017	female	Labrador Retriever	7	Simple carcinoma (Solid type)	Carcinoma solid	≤8years	Purebred	Malignant
271	2017	female	Mixed	8	Fibrosarcoma	Fibrosarcoma	≤8years	Mixed breed	Malignant
272	2017	female	Poodle	14	Osteosarcoma	Osteosarcoma	>8years	Purebred	Malignant
273	2017	female	Mixed	10	Simple carcinoma (anaplastic type)	Carcinoma anaplastic	>8years	Mixed breed	Malignant
274	2017	female	Miniature	12	Simple carcinoma (Solid type)	Carcinoma solid	>8years	Purebred	Malignant
275	2017	female	Poodle	12	Simple carcinoma (anaplastic type)	Carcinoma anaplastic	>8years	Purebred	Malignant
276	2017	female	Shitzu	10	Simple carcinoma (Solid type)	Carcinoma solid	>8years	Purebred	Malignant
277	2017	female	Poodle	11	Complex carcinoma	Carcinoma complex	>8years	Purebred	Malignant
278	2017	female	Mixed	7	Simple carcinoma (anaplastic type)	Carcinoma anaplastic	≤8years	Mixed breed	Malignant
279	2017	female	Bangkaew	7	Simple carcinoma (Solid type)	Carcinoma solid	≤8years	Purebred	Malignant
280	2018	Female	Mixed	10	Papillary cystic adenocarcinoma with suppurative mastitis	Carcinoma simple:Cystic-papillary carcinoma	>8years	Mixed breed	Malignant
281	2018	Female	Poodle	8	Simple tubular adenocarcinoma Grade 2	Carcinoma simple:Tubular carcinoma	≤8years	Purebred	Malignant
282	2018	Female	Poodle	12	Solid carcinoma and anaplastic carcinoma Grade 3	Two type of tumors	>8years	Purebred	Malignant
283	2018	Female	Mixed	15	Extraskeletal osteosarcoma	Osteosarcoma	>8years	Mixed breed	Malignant
284	2018	Female	Shitzu	8	Papillary cystic adenocarcinoma grade 2	Carcinoma simple:Cystic-papillary carcinoma	≤8years	Purebred	Malignant
285	2018	Female	Shitzu	7	Complex mammary carcinoma	Carcinoma complex	≤8years	Purebred	Malignant
286	2018	Female	Poodle	10	Simple carcinoma (tubulopapillary pattern)	Carcinoma simple:Tubulo-papillary carcinoma	>8years	Purebred	Malignant
287	2018	Female	Poodle	11	Osteosarcoma	Osteosarcoma	>8years	Purebred	Malignant
288	2018	Female	Chihuahua	10	Mixed mammary gland tumor	Carcinosarcoma	>8years	Purebred	Malignant
289	2018	Female	Poodle	11	Simple carcinoma (tubulopapillary pattern)	Carcinoma simple:Tubulo-papillary carcinoma	>8years	Purebred	Malignant
290	2018	Female	Poodle	12	Complex carcinoma	Carcinoma complex	>8years	Purebred	Malignant
291	2018	Female	Golden Retrever	6	Compex carcinoma	Carcinoma complex	≤8years	Purebred	Malignant
292	2018	Female	Poodle	8	Simple carcinoma (tubulopapillary pattern)	Carcinoma simple:Tubulo-papillary carcinoma	≤8years	Purebred	Malignant
293	2018	Female	Poodle	7	Mammary mixed tumor	Carcinosarcoma	≤8years	Purebred	Malignant
294	2018	Female	Mixed	11	Mammary mixed tumor	Carcinosarcoma	>8years	Mixed breed	Malignant
295	2018	Female	Poodle	7	Mammary mixed tumor	Carcinosarcoma	≤8years	Purebred	Malignant
296	2018	Female	Poodle	10	Mammary mixed tumor and complex mammary carcinoma	Two type of tumors	>8years	Purebred	Malignant
297	2018	Female	Cocker Spaniel	14	Mammary mixed tumor	Carcinosarcoma	>8years	Purebred	Malignant
298	2018	Female	Mixed	7	Anaplastic carcinoma	Carcinoma anaplastic	≤8years	Mixed breed	Malignant
299	2018	Female	Poodle	12	Simple carcinoma (Tubulopapillary type)	Carcinoma simple:Tubulo-papillary carcinoma	>8years	Purebred	Malignant
300	2018	Female	Golden Retrever	11	Simple mammary carcinoma (Tubular type)	Carcinoma simple:Tubular carcinoma	>8years	Purebred	Malignant
301	2018	Female	Mixed	16	Complex carcinoma	Carcinoma complex	>8years	Mixed breed	Malignant
302	2018	Female	Shitzu	12	Simple mammary carcinoma (Papillary type)	Carcinoma simple:Tubulo-papillary carcinoma	>8years	Purebred	Malignant
303	2018	Female	Shitzu	12	Simple mammary carcinoma (Tubular type)	Carcinoma simple:Tubular carcinoma	>8years	Purebred	Malignant
304	2018	Female	Shitzu	12	Solid mammary carcinoma	Carcinoma solid	>8years	Purebred	Malignant
305	2018	Female	Mixed	10	Anaplastic carcinoma	Carcinoma anaplastic	>8years	Mixed breed	Malignant
306	2018	Female	Poodle	12	Simple carcinoma (Tubulopapillary type)	Carcinoma simple:Tubulo-papillary carcinoma	>8years	Purebred	Malignant
307	2018	Female	Shitzu	13	Mammary mixed tumor	Carcinosarcoma	>8years	Purebred	Malignant
308	2018	Female	Shitzu	5	Complex carcinoma	Carcinoma complex	≤8years	Purebred	Malignant
309	2018	Female	Chihuahua	10	Complex carcinoma	Carcinoma complex	>8years	Purebred	Malignant
310	2018	Female	American Pitbull	10	Anaplastic carcinoma	Carcinoma anaplastic	>8years	Purebred	Malignant
311	2018	Female	Mixed	8	Anaplastic carcinoma	Carcinoma anaplastic	≤8years	Mixed breed	Malignant
312	2018	Female	Mixed	8	Mammary mixed tumor	Carcinosarcoma	≤8years	Mixed breed	Malignant
313	2018	Female	Poodle	12	Complex carcinoma	Carcinoma complex	>8years	Purebred	Malignant
314	2018	Female	Daschund	11	Complex carcinoma	Carcinoma complex	>8years	Purebred	Malignant
315	2018	Female	Mixed	11	Simple carcinoma (tubular type)	Carcinoma simple:Tubular carcinoma	>8years	Mixed breed	Malignant
316	2018	Female	Poodle	12	Complex carcinoma	Carcinoma complex	>8years	Purebred	Malignant
317	2018	Female	Mixed	7	Solid carcinoma	Carcinoma solid	≤8years	Mixed breed	Malignant
318	2019	Female	Beagle	11	Tubular carcinoma	Carcinoma simple:Tubular carcinoma	>8years	Purebred	Malignant
319	2019	Female	Mixed	14	Solid mammary gland carcinoma	Carcinoma solid	>8years	Mixed breed	Malignant
320	2019	Female	Cocker spaniel	10	Complex adenocarcinoma	Carcinoma complex	>8years	Purebred	Malignant
321	2019	Female	Miniature	12	Solid mammary gland carcinoma	Carcinoma solid	>8years	Purebred	Malignant
322	2019	Female	Alaskan Malamute	9	Mammary mixed tumor grade 2	Carcinosarcoma	>8years	Purebred	Malignant
323	2019	Female	Chihuahua	9	Complex carcinoma	Carcinoma complex	>8years	Purebred	Malignant
324	2019	Female	Shitzu	10	Solid carcinoma	Carcinoma solid	>8years	Purebred	Malignant
325	2019	Female	Mixed	8	Comedocarcinoma	Comedocarcinoma	≤8years	Mixed breed	Malignant
326	2019	Female	Chihuahua	14	Simple mammary carcinoma (Cystic papillary type)	Carcinoma simple:Cystic-papillary carcinoma	>8years	Purebred	Malignant
327	2019	Female	Shitzu	9	Complex carcinoma	Carcinoma complex	>8years	Purebred	Malignant
328	2019	Female	Mixed	13	Complex carcinoma	Carcinoma complex	>8years	Mixed breed	Malignant
329	2019	Female	Mixed	10	Anaplastic carcinoma	Carcinoma anaplastic	>8years	Mixed breed	Malignant
330	2019	Female	Mixed	3	Papillary adenocarcinoma	Carcinoma simple:Tubulo-papillary carcinoma	≤8years	Mixed breed	Malignant
331	2019	Female	Pomeranian	4	Solid carcinoma	Carcinoma solid	≤8years	Purebred	Malignant
332	2019	Female	Shitzu	3	Simple papillary and ductal adenocarcinoma, grade 1	Carcinoma simple:Tubulo-papillary carcinoma	≤8years	Purebred	Malignant
333	2019	Female	Mixed	10	Anaplastic carcinoma	Carcinoma anaplastic	>8years	Mixed breed	Malignant
334	2019	Female	Mixed	11	Simple tubular adenocarcinoma, grade 1	Carcinoma simple:Tubular carcinoma	>8years	Mixed breed	Malignant
335	2019	Female	Siberian	8	Solid carcinoma, grade 3	Carcinoma solid	≤8years	Purebred	Malignant
336	2019	Female	Mixed	11	Simple tubular adenocarcinoma, grade 2	Carcinoma simple:Tubular carcinoma	>8years	Mixed breed	Malignant
337	2019	Female	Mixed	15	Simple tubular adenocarcinoma, grade 2	Carcinoma simple:Tubular carcinoma	>8years	Mixed breed	Malignant
338	2019	Female	Mixed	10	Anaplastic carcinoma	Carcinoma anaplastic	>8years	Mixed breed	Malignant
339	2019	Female	Shitzu	11	Simple tubular adenocarcinoma	Carcinoma simple:Tubular carcinoma	>8years	Purebred	Malignant
340	2019	Female	Beagle	10	Invasive tubular adenocarcinoma, grade 2	Carcinoma simple:Tubular carcinoma	>8years	Purebred	Malignant
341	2019	Female	Chihuahua	9	Solid carcinoma	Carcinoma solid	>8years	Purebred	Malignant
342	2019	Female	Beagle	11	Mammary mixed tumor	Carcinosarcoma	>8years	Purebred	Malignant
343	2019	Female	French Bulldog	5	Mammary mixed tumor	Carcinosarcoma	≤8years	Purebred	Malignant

## Sheet: privot B-cmt
ป้ายชื่อแถว	นับจำนวน ของ No
Adenoma simple	4
Basal cell adenoma	1
Benign mixed tumor	35
Complex adenoma	8
Cystadenoma	6
Fibroadenoma	3
Fibroma	1
ผลรวมทั้งหมด	58

## Sheet: Benign CMT
No	Year	Sex	Breed	Age	Classification	Re-classification	Age catagorized	Breed catagorized	Type of tumor
1	2012	Male	Mixed	5	Benign mixed tumor	Benign mixed tumor	≤8years	Mixed breed	Benign
2	2012	Female	Mixed	12	Benign mixed mammary gland tumor	Benign mixed tumor	>8years	Mixed breed	Benign
3	2012	Female	Mixed	7	Mammary gland cystadenoma	Cystadenoma	≤8years	Mixed breed	Benign
4	2013	Female	Beagle	5	Mammary gland adenoma	Adenoma simple	≤8years	Purebred	Benign
5	2013	Female	mixed	9	Low-cellularity fibroadenoma	Fibroadenoma	>8years	Mixed breed	Benign
6	2013	Female	shitzu	11	Benign mixed tumor	Benign mixed tumor	>8years	Purebred	Benign
7	2013	Female	Poodle	7	Benign mixed tumor	Benign mixed tumor	≤8years	Purebred	Benign
8	2013	Female	LR	4	Benign mixed tumor	Benign mixed tumor	≤8years	Purebred	Benign
9	2014	Female	Cocker	6	Benign mixed tumor	Benign mixed tumor	≤8years	Purebred	Benign
10	2014	Female	GR	5	Fibroma	Fibroma	≤8years	Purebred	Benign
11	2014	Female	Poodle	12	Complex adenoma	Complex adenoma	>8years	Purebred	Benign
12	2014	Female	Shitzu	9	Benign mixed tumor	Benign mixed tumor	>8years	Purebred	Benign
13	2014	Female	Poodle	10	Benign mixed tumor	Benign mixed tumor	>8years	Purebred	Benign
14	2014	Female	Poodle	7	Complex adenoma	Complex adenoma	≤8years	Purebred	Benign
15	2014	Female	Split	15	Complex adenoma	Complex adenoma	>8years	Purebred	Benign
16	2014	Female	Mixed	10	Cystadenoma	Cystadenoma	>8years	Mixed breed	Benign
17	2015	Female	Pug	2	Mammary gland cystadenoma	Cystadenoma	≤8years	Purebred	Benign
18	2015	Female	Poodle	7	Benign mixed mammary gland tumor	Benign mixed tumor	≤8years	Purebred	Benign
19	2015	Female	Poodle	11	Mammary gland adenoma	Adenoma simple	>8years	Purebred	Benign
20	2015	Female	Shitzu	11	Complex adenoma	Complex adenoma	>8years	Purebred	Benign
21	2015	Female	Mixed	11	Benign mixed mammary gland tumor	Benign mixed tumor	>8years	Mixed breed	Benign
22	2015	Female	Miniature	11	Benign mixed mammary tumor	Benign mixed tumor	>8years	Purebred	Benign
23	2015	Female	Shitzu	5	Complex adenoma	Complex adenoma	≤8years	Purebred	Benign
24	2015	Female	Poodle	11	Benign mixed mammary tumor	Benign mixed tumor	>8years	Purebred	Benign
25	2015	Female	Mixed	13	Basal cell adenoma	Basal cell adenoma	>8years	Mixed breed	Benign
26	2015	Female	Mixed	7	Benign mixed mammary gland tumor	Benign mixed tumor	≤8years	Mixed breed	Benign
27	2015	Female	Poodle	8	Benign mixed mammary gland tumor	Benign mixed tumor	≤8years	Purebred	Benign
28	2015	Female	Mixed	5	Tubulopapillary cystadenoma	Cystadenoma	≤8years	Mixed breed	Benign
29	2015	Female	Mixed	9	Benign mixed mammary gland tumor	Benign mixed tumor	>8years	Mixed breed	Benign
30	2015	Female	GR	12	Benign mixed mammary tumor	Benign mixed tumor	>8years	Purebred	Benign
31	2015	Female	Mixed	10	Benign mixed mammary tumor	Benign mixed tumor	>8years	Mixed breed	Benign
32	2016	Female	German Sheperd	9	Benign mixed mammary gland tumor	Benign mixed tumor	>8years	Purebred	Benign
33	2016	Female	Shitzu	11	Benign mixed mammary gland tumor	Benign mixed tumor	>8years	Purebred	Benign
34	2016	Female	LR	10	Benign mixed mammary gland tumor	Benign mixed tumor	>8years	Purebred	Benign
35	2016	Female	Poodle	15	Benign mixed mammary gland tumor	Benign mixed tumor	>8years	Purebred	Benign
36	2016	Female	Mixed	9	Benign mixed mammary gland tumor	Benign mixed tumor	>8years	Mixed breed	Benign
37	2016	Female	Mixed	9	Benign mixed mammary gland tumor	Benign mixed tumor	>8years	Mixed breed	Benign
38	2016	Female	Dachshund	11	Simple adenoma	Adenoma simple	>8years	Purebred	Benign
39	2016	Female	German Sheperd	11	Benign mixed mammary gland tumor	Benign mixed tumor	>8years	Purebred	Benign
40	2016	Female	GR	8	Benign mixed mammary gland tumor	Benign mixed tumor	≤8years	Purebred	Benign
41	2017	female	Poodle	11	Benign mixed mammary gland tumor	Benign mixed tumor	>8years	Purebred	Benign
42	2017	female	Mixed	12	Benign mixed mammary gland tumor	Benign mixed tumor	>8years	Mixed breed	Benign
43	2017	female	German sheperd	12	Simple adenoma with cyst	Cystadenoma	>8years	Purebred	Benign
44	2017	female	Jack Russell	9	Benign mixed mammary gland tumor	Benign mixed tumor	>8years	Purebred	Benign
45	2017	female	Mixed	7	Benign mixed mammary gland tumor	Benign mixed tumor	≤8years	Mixed breed	Benign
46	2017	female	Mixed	6	Benign mixed mammary gland tumor	Benign mixed tumor	≤8years	Mixed breed	Benign
47	2018	Female	Poodle	9	Benign mixed mammary gland tumor	Benign mixed tumor	>8years	Purebred	Benign
48	2018	Female	Mixed	11	Simple papillary cystic adenoma	Cystadenoma	>8years	Mixed breed	Benign
49	2018	Female	Mixed	10	Complex adenoma	Complex adenoma	>8years	Mixed breed	Benign
50	2018	Female	Mixed	13	Fibroadenoma	Fibroadenoma	>8years	Mixed breed	Benign
51	2018	Female	Golden Retrever	9	Simple mammary adenoma	Adenoma simple	>8years	Purebred	Benign
52	2019	Male	Mixed	1	Complex adenoma	Complex adenoma	≤8years	Mixed breed	Benign
53	2019	Female	Dachshund	11	Benign mixed tumor	Benign mixed tumor	>8years	Purebred	Benign
54	2019	Female	Poodle	12	Fibroadenoma	Fibroadenoma	>8years	Purebred	Benign
55	2019	Female	Poodle	10	Complex adenoma	Complex adenoma	>8years	Purebred	Benign
56	2019	Female	Mixed	5	Benign mixed mammary tumor	Benign mixed tumor	≤8years	Mixed breed	Benign
57	2019	Female	Mixed	12	Benign mixed mammary tumor	Benign mixed tumor	>8years	Mixed breed	Benign
58	2019	Female	Pomeranian	6	Benign mixed tumor	Benign mixed tumor	≤8years	Purebred	Benign

## Sheet: privot b-fmt
ป้ายชื่อแถว	นับจำนวน ของ No
Adenoma	4
Cystadenoma	1
Intraductal adenoma	1
ผลรวมทั้งหมด	6

## Sheet: Benign FMT
No	Year	Sex	Breed	Age	Classification	Re-classification	Age catagorized	Breed catagorized	Type of tumor
1	2014	Female	American shorthair	8 mo	Mammary gland adenoma	Adenoma	≤8years	Purebred	Benign
2	2015	Female	DSH	12	Mammary gland cystadenoma	Cystadenoma	>8years	Mixed breed	Benign
3	2017	female	Persian	11	Simple adenoma	Adenoma	>8years	Purebred	Benign
4	2017	female	Persian	8 mo	Simple adenoma	Adenoma	≤8years	Purebred	Benign
5	2018	Female	Persian	7	Simple papillary adenoma	Adenoma	≤8years	Purebred	Benign
6	2019	Female	DSH	13	Intraductal papillary adenoma	Intraductal adenoma	>8years	Mixed breed	Benign

## Sheet: privot m-fmt
ป้ายชื่อแถว	นับจำนวน ของ No
Carcinoma Simple: Cribiform carcinoma	1
Carcinoma Simple: Cystic-papillary carcinoma	1
Carcinoma Simple: Tubular carcinoma	6
Carcinoma Simple: Tubulo-papillary carcinoma	5
Carcinoma Solid	7
Carcinosarcoma	1
Comedocarcinoma	1
Ductal carcinoma	1
Intraductal papillary carcinoma	6
Sarcoma:Osteosarcoma	1
ผลรวมทั้งหมด	30

## Sheet: Malignant FMT
No	Year	Sex	Breed	Age	Classification	Re-classification	Age catagorized	Breed catagorized	Type of tumor
1	2012	Female	DSH	8	Solid carcinoma	Carcinoma Solid	≤8years	Mixed breed	Malignant
2	2012	Female	DSH	10	Simple carcinoma (Solid carcinoma)	Carcinoma Solid	>8years	Mixed breed	Malignant
3	2012	Female	DSH	12	Tubulopapillary carcinoma	Intraductal papillary carcinoma	>8years	Mixed breed	Malignant
4	2012	Female	DSH	16	Tubulopapillary carcinoma	Intraductal papillary carcinoma	>8years	Mixed breed	Malignant
5	2013	Female	DSH	9	Simple carcinoma (Solid type)	Carcinoma Solid	>8years	Mixed breed	Malignant
6	2013	Female	DSH	11	Tubulopapillary carcinoma	Intraductal papillary carcinoma	>8years	Mixed breed	Malignant
7	2013	Female	DSH	13	Solid carcinoma	Carcinoma Solid	>8years	Mixed breed	Malignant
8	2013	Female	DSH	8	Tubulopapillary carcinoma	Intraductal papillary carcinoma	≤8years	Mixed breed	Malignant
9	2013	Female	DSH	6	Tubulopapillary carcinoma	Intraductal papillary carcinoma	≤8years	Mixed breed	Malignant
10	2014	Female	DSH	7	Tubulopapillary carcinoma	Intraductal papillary carcinoma	≤8years	Mixed breed	Malignant
11	2014	Male	DSH	16	Malignant mixed tumor	Carcinosarcoma	>8years	Mixed breed	Malignant
12	2014	Female	Persian	9	Cystadenocarcinoma	Carcinoma Simple: Cystic-papillary carcinoma	>8years	Purebred	Malignant
13	2014	Female	DSH	10	Simple carcinoma(Solid type)	Carcinoma Solid	>8years	Mixed breed	Malignant
14	2014	Female	DSH	1	Simple carcinoma(Tubulopapillary type)	Carcinoma Simple: Tubulo-papillary carcinoma	≤8years	Mixed breed	Malignant
15	2015	Female	Siamese	10	Simple carcinoma ( Tubulopapillary type)	Carcinoma Simple: Tubulo-papillary carcinoma	>8years	Purebred	Malignant
16	2015	Female	DSH	12	Osteosarcoma	Sarcoma:Osteosarcoma	>8years	Mixed breed	Malignant
17	2017	female	Persian	11	Simple carcinoma (tubulopapillary type)	Carcinoma Simple: Tubulo-papillary carcinoma	>8years	Purebred	Malignant
18	2017	female	DSH	14	Simple carcinoma (tubulopapillary type)	Carcinoma Simple: Tubulo-papillary carcinoma	>8years	Mixed breed	Malignant
19	2018	Female	DSH	8	Simple tubular carcinoam grade 2	Carcinoma Simple: Tubular carcinoma	≤8years	Mixed breed	Malignant
20	2018	Female	DSH	12	Simple tubulo-papillary adenocarcinoma	Carcinoma Simple: Tubulo-papillary carcinoma	>8years	Mixed breed	Malignant
21	2018	Female	Persian	10	Simple carcinoma (tubular type)	Carcinoma Simple: Tubular carcinoma	>8years	Purebred	Malignant
22	2018	Female	DSH	10	Solid mammary gland carcinoma	Carcinoma Solid	>8years	Mixed breed	Malignant
23	2019	Female	DSH	9	Tubular carcinoma	Ductal carcinoma	>8years	Mixed breed	Malignant
24	2019	Female	DSH	10	Simple mammary carcinoma (Tubular type)	Carcinoma Simple: Tubular carcinoma	>8years	Mixed breed	Malignant
25	2019	Female	DSH	8	Cribiform carcinoma	Carcinoma Simple: Cribiform carcinoma	≤8years	Mixed breed	Malignant
26	2019	Female	Persian	2	Comedocarcinoma	Comedocarcinoma	≤8years	Purebred	Malignant
27	2019	Female	DSH	5	Simple tubular adenocarcinoma, grade 2	Carcinoma Simple: Tubular carcinoma	≤8years	Mixed breed	Malignant
28	2019	Female	DSH	2	Simple mammary carcinoma (Tubular type)	Carcinoma Simple: Tubular carcinoma	≤8years	Mixed breed	Malignant
29	2019	Female	DSH	7	Solid carcinoma	Carcinoma Solid	≤8years	Mixed breed	Malignant
30	2019	Female	DSH	7	Simple carcinoma (tubular type)	Carcinoma Simple: Tubular carcinoma	≤8years	Mixed breed	Malignant

## Sheet: CMT number per year
Year	CMT	Other tumor	Total			Year	CMT(%)	Other tumor (%)
2012	56	121	177			2012	31.6384	68.3616
2013	72	176	248			2013	29.0323	70.9677
2014	59	207	266			2014	22.1805	77.8195
2015	73	219	292			2015	25	75
2016	51	157	208			2016	24.5192	75.4808
2017	35	130	165			2017	21.2121	78.7879
2018	48	170	218			2018	22.0183	77.9817
2019	42	123	165			2019	25.4545	74.5455
	437	1303	1740

## Sheet: FMT number per year
Year	FMT	Other tumor	Total			Year	FMT(%)	Other tumor (%)
2012	4	3	7			2012	57.1429	42.8571
2013	5	4	9			2013	55.5556	44.4444
2014	5	6	11			2014	45.4545	54.5455
2015	3	7	10			2015	30	70
2016	0	7	7			2016	0	100
2017	3	9	12			2017	25	75
2018	5	12	17			2018	29.4118	70.5882
2019	7	5	12			2019	58.3333	41.6667
	32	53	85

[truncated: 6 more sheets: Risk factor cmt, Risk factor fmt, CMT classification, FMT classification, CMT age, FMT age]
