# Supplementary material for: Epidemiology and classification for canine and feline mammary gland tumors: a histopathological survey of 437 mammary gland tumor biopsies performed in a secondary care hospital in Chiang Mai, Thailand from 2012 to 2019
Source: PeerJ. 2024 Mar 15;12:e17077. doi: 10.7717/peerj.17077 (PMC10946389; doi:10.7717/peerj.17077)
Supplement: Supplemental Information 3 [file peerj-12-17077-s003.xlsx]

## Sheet: privot all data of patients
Animal	Feline
Location	Mass at mammary gland
Classification	(ทั้งหมด)
ป้ายชื่อแถว	นับจำนวน ของ No
1	1
2	1
5	1
6	1
7	3
8	4
9	2
10	6
11	2
12	4
13	2
14	1
16	2
8 mo	2
ผลรวมทั้งหมด	32

## Sheet: all data of patients
No	Year	ID	Lab ID	Animal	Name	Sex	Breed	Age	Location	Classification	Age catagorized	Breed catagorized
1	2012	P5517934	D12-375	canine	จินนี่	Female	Shitzu	9	Mass at mammary gland	Simple carcinoma (Solid type)	>8years	Purebred
2	2012	P5517872	D12-392	canine	นิล	Female	Mixed	4	Mass at mammary gland	Simple carcinoma (Anaplastic type)	≤8years	Mixed breed
3	2012	P5517901	D12-376	canine	อุ้ยอ้าย	Female	Poodle	11	Mass at mammary gland	Simple carcinoma (Solid type)	>8years	Purebred
4	2012	P5517625	D12-339	canine	Snow white	Female	Poodle	9	Mass at mammary gland	Tubulopapillary carcinoma	>8years	Purebred
5	2012	P5410965	D12-309	canine	ซินดี้	Female	Dalmatian	13	Mass at mammary gland	Tubulopapillary carcinoma	>8years	Purebred
6	2012	P5517515	D12-268	canine	ตัวเล็ก	Female	Poodle	8	Mass at mammary gland	Simple carcinoma (Anaplastic type)	≤8years	Purebred
7	2012	P5517627	D12-281	canine	เจนนี่	Female	Poodle	10	Mass at mammary gland	Solid carcinoma	>8years	Purebred
8	2012	P5517230	D12-233	canine	มอมเเมม	Female	Mixed	10	Mass at mammary gland	Complex tubular adenocarcinoma	>8years	Mixed breed
9	2012	P5517123	D12-234	canine	ดุ๊กดิ๊ก	Female	Shitzu	10	Mass at mammary gland	Malignant mixed tumor	>8years	Purebred
10	2012	P5517136	D12-199	canine	ถุงทอง	Female	Mixed	9	Mass at mammary gland	Complex carcinoma	>8years	Mixed breed
11	2012	P5516612	D12-065	canine	เชอร์รี่	Female	Poodle	11	Mass at mammary gland	Complex carcinoma	>8years	Purebred
12	2012	P5517038	D12-181	canine	ข้าวโพด	Female	Mixed	8	Mass at mammary gland	Malignant mixed tumor	≤8years	Mixed breed
13	2012	P5516553	D12-066	canine	ไอติม	Female	Mixed	12	Mass at mammary gland	Tubulopapillary carcinoma	>8years	Mixed breed
14	2012	P5516970	D12-156	canine	เบิร์ดเดย์	Female	Mixed	8	Mass at mammary gland	Malignant mixed tumor	≤8years	Mixed breed
15	2012	P5516978	D12-157	canine	เลี่ยม	Female	Mixed	10	Mass at mammary gland	Tubulopapillary carcinoma	>8years	Mixed breed
16	2012	P5516931	D12-153	canine	ซาร่า	Female	Mixed	6	Mass at mammary gland	Solid carcinoma	≤8years	Mixed breed
17	2012	P5516547	D12-046	canine	เคา	Female	Mixed	15	Mass at mammary gland	Solid carcinoma	>8years	Mixed breed
18	2012	P5413065	D12-025	canine	มีมี่	Female	Mixed	14	Mass at mammary gland	Solid carcinoma	>8years	Mixed breed
19	2012	P5413186	D12-047	canine	เฉาก๊วย	Female	Mixed	5	Mass at mammary gland	Complex solid carcinoma	≤8years	Mixed breed
20	2012	P5416295	D12-016	canine	มอมเเมม	Female	Mixed	17	Mass at mammary gland	Solid carcinoma	>8years	Mixed breed
21	2012	P5519574	D12-776	canine	พองโก้	Female	Poodle	15	Mass at mammary gland	Simple carcinoma (Anaplastic type)	>8years	Purebred
22	2012	P5519667	D12-812	canine	เเอนนา	Female	Cocker Spanial	8	Mass at mammary gland	Simple carcinoma (Solid type)	≤8years	Purebred
23	2012	P5519346	D12-747	canine	เเบงค์	Male	Mixed	7	Mass at mammary gland	Simple carcinoma (Anaplastic type)	≤8years	Mixed breed
24	2012	P5519306	D12-710	canine	ซูกัส	Female	Poodle	8	Mass at mammary gland	Malignant mixed tumor	≤8years	Purebred
25	2012	P5519326	D12-694	canine	พุดดิ้ง	Female	Mixed	12	Mass at mammary gland	Tubulopapillary carcinoma	>8years	Mixed breed
26	2012	P5519189	D12-680	canine	โรบิน	Female	Miniature	8	Mass at mammary gland	Solid carcinoma	≤8years	Purebred
27	2012	P5518864	D12-610	canine	นิกกี้	Male	Mixed	5	Mass at mammary gland	Benign mixed tumor	≤8years	Mixed breed
28	2012	P5519144	D12-652	canine	ข้าวจ้าว	Female	Cocker Spanial	8	Mass at mammary gland	Solid carcinoma	≤8years	Purebred
29	2012	P5518267	D12-506	canine	เเบมเเบม	Female	Poodle	7	Mass at mammary gland	Mucinous carcinoma	≤8years	Purebred
30	2012	P5306803	D12-484	canine	ยุ่ง	Female	Mixed	7	Mass at mammary gland	Complex carcinoma	≤8years	Mixed breed
31	2012	P5518228	D12-446	canine	กีวี่	Female	Poodle	10	Mass at mammary gland	Complex carcinoma	>8years	Purebred
32	2012	P5518232	D12-445	canine	ขี้มูก	Female	Rottweiler	7	Mass at mammary gland	Simple carcinoma (Anaplastic type)	≤8years	Purebred
33	2012	P5518124	D12-420	canine	แบล็ก	Female	Miniature	10	Mass at mammary gland	Malignant mixed tumor	>8years	Purebred
34	2012	P5522778	D12-1644	canine	ไข่เจียว	Female	Mixed	9	Mass at mammary gland	Tubulopapillary carcinoma	>8years	Mixed breed
35	2012	P5521271	D12-1567	canine	โบโบ้	Female	Mixed	8	Mass at mammary gland	Malignant mixed tumor	≤8years	Mixed breed
36	2012	P5522253	D12-1510	canine	ชีต้า	Female	Mixed	9	Mass at mammary gland	Tubulopapillary carcinoma	>8years	Mixed breed
37	2012	P5521848	D12-1441	canine	ข้าวนึ่ง	Female	Mixed	10	Mass at mammary gland	Adenosis with infiltrating carcinoma	>8years	Mixed breed
38	2012	P5522233	D12-1506	canine	โคล่า	Female	Mixed	10	Mass at mammary gland	Malignant mixed tumor	>8years	Mixed breed
39	2012	P5521474	D12-1438	Feline	เเต้ม	Female	DSH	8	Mass at mammary gland	Solid carcinoma	≤8years	Mixed breed
40	2012	P5412640	D12-1199	Feline	สามสี	Female	DSH	10	Mass at mammary gland	Simple carcinoma (Solid carcinoma)	>8years	Mixed breed
42	2011	P5516460	D12-026	canine	บี้	Female	Mixed	10	Mass at mammary gland	Malignant mixed tumor	>8years	Mixed breed
43	2012	P5521253	D12-1246	Feline	เหมียว	Female	DSH	12	Mass at mammary gland	Tubulopapillary carcinoma	>8years	Mixed breed
44	2012	P5521278	D12-1247	canine	เด็ก	Female	Mixed	12	Mass at mammary gland	Benign mixed mammary gland tumor	>8years	Mixed breed
45	2012	P5301473	D12-1226	canine	ดุ๊กดิ๊ก	Female	Miniature	10	Mass at mammary gland	Simple carcinoma (Solid carcinoma)	>8years	Purebred
46	2012	P5521114	D12-1201	canine	ท๊อฟฟี่	Female	Poodle	7	Mass at mammary gland	Malignant mixed tumor	≤8years	Purebred
47	2012	P5518164	D12-1117	canine	เหมียวๆ	Female	Mixed	8	Mass at mammary gland	Simple carcinoma (Anaplastic type)	≤8years	Mixed breed
48	2012	P5521023	D12-1154	canine	หมี	Female	Mixed	12	Mass at mammary gland	Simple carcinoma (Anaplastic type)	>8years	Mixed breed
49	2012	P5307582	D12-1000	Feline	Maxi	Female	DSH	16	Mass at mammary gland	Tubulopapillary carcinoma	>8years	Mixed breed
50	2012	P5520956	D12-1130	canine	น้องพลอยสวย	Female	Mixed	7	Mass at mammary gland	Mammary gland cystadenoma	≤8years	Mixed breed
51	2012	P5520868	D12-1132	canine	สอง	Female	Mixed	5	Mass at mammary gland	Carcinosarcoma	≤8years	Mixed breed
52	2012	P5520933	D12-1133	canine	ดิ๋ง	Female	Mixed	11	Mass at mammary gland	Simple carcinoma (Anaplastic type)	>8years	Mixed breed
53	2012	P5518878	D12-1131	canine	แอนนี่	Female	Golden Retriever	10	Mass at mammary gland	Malignant mixed mammary gland	>8years	Purebred
54	2012	P5520505	D12-1007	canine	Pixxy	Female	Bangkaew	10	Mass at mammary gland	Tubulopapillary carcinoma	>8years	Purebred
55	2012	P5520453	D12-989	canine	พอลลี่	Female	Golden Retriever	9	Mass at mammary gland	Fibrosarcoma	>8years	Purebred
56	2012	P5518018	D12-905	canine	เตี้ย	Female	Mixed	6	Mass at mammary gland	Tubulopapillary carcinoma	≤8years	Mixed breed
57	2012	P5520187	D12-947	canine	สตางค์	Female	mixed	10	Mass at mammary gland	Tubulopapillary carcinoma	>8years	Mixed breed
58	2013	p5628715	D13-1674	canine	ลีออง	Female	Beagle	5	Mass at mammary gland	Mammary gland adenoma	≤8years	Purebred
59	2013	P5628531	D13-1622	canine	นางปุย	Female	Mixed	9	Mass at mammary gland	Simple carcinoma	>8years	Mixed breed
60	2013	P5300536	D13-2665	canine	ฟาราห์	Female	Poodle	16	Mass at mammary gland	Simple carcinoma (Solid carcinoma)	>8years	Purebred
61	2013	P5302009	D13-1688	canine	นิต้า	Female	Poodle	10	Mass at mammary gland	Malignant mixed tumor	>8years	Purebred
62	2013	P5627854	D13-1437	canine	มีมี่	Female	mixed	9	Mass at mammary gland	Malignant mixed tumor	>8years	Mixed breed
63	2013	P5628240	D13-1501	Feline	ไพลิน	Female	DSH	9	Mass at mammary gland	Simple carcinoma (Solid type)	>8years	Mixed breed
64	2013	P5625578	D13-1755	canine	ปุยฝ้าย	Female	Poodle	10	Mass at mammary gland	Simple carcinoma (Tubulopapillary carcinoma)	>8years	Purebred
65	2013	P5623477	D13-117	canine	เหมย	Female	Mixed	10	Mass at mammary gland	Tubulopapillary carcinoma	>8years	Mixed breed
66	2013	P5623459	D13-158	canine	บิวตี้	Female	mixed	9	Mass at mammary gland	Low-cellularity fibroadenoma	>8years	Mixed breed
67	2013	P5518659	D13-157	canine	มิมิ	Female	Poodle	11	Mass at mammary gland	complex carcinoma	>8years	Purebred
68	2013	P5520216	D13-185	canine	เยลลี่	Female	Golden Retriever	10	Mass at mammary gland	malignant mixed mammary glant tumor	>8years	Purebred
69	2013	P5623728	D13-193	Feline	ตัวเล็ก	Female	DSH	11	Mass at mammary gland	Tubulopapillary carcinoma	>8years	Mixed breed
70	2013	P5627591	D13-1359	canine	ชมพู่	Female	Poodle	13	Mass at mammary gland	Tubulopapillary carcinoma	>8years	Purebred
71	2013	P5628409	D13-1598	canine	ดุ๊กดิ๊ก	Female	mixed	15	Mass at mammary gland	Simple carcinoma (Solid type)	>8years	Mixed breed
72	2013	P5625399	D13-650	canine	ยู่ยี่	Female	mixed	12	Mass at mammary gland	Solid carcinoma	>8years	Mixed breed
73	2013	P5519797	D13-536	canine	บะหมี่	Female	mixed	10	Mass at mammary gland	Solid carcinoma	>8years	Mixed breed
74	2013	P5625458	D13-695	canine	ชิบิ	Female	mixed	4	Mass at mammary gland	Mucinous adenocarcinoma	≤8years	Mixed breed
75	2013	P5625395	D13-693	canine	ตะนอย	Female	Pekingese	11	Mass at mammary gland	complex carcinoma	>8years	Purebred
76	2013	P5625366	D13-709	canine	เเจม	Female	Mixed	4	Mass at mammary gland	Simple carcinoma (Solid carcinoma)	≤8years	Mixed breed
77	2013	P5624960	D13-545	canine	จุ้นจ้าน	Female	mixed	10	Mass at mammary gland	complex carcinoma	>8years	Mixed breed
78	2013	P5625459	D13-696	canine	กาแฟ	Female	mixed	5	Mass at mammary gland	Simple carcinoma (Anaplastic type)	≤8years	Mixed breed
79	2013	P5522620	D13-001	canine	จิ๋ว	Female	mixed	7	Mass at mammary gland	Mixed mammary gland tumor	≤8years	Mixed breed
80	2013	P5302289	D13-015	canine	สตัง	Female	mixed	15	Mass at mammary gland	Anaplastic carcinoma	>8years	Mixed breed
81	2013	P5623391	D13-091	canine	กล้วยไข่	Female	mixed	10	Mass at mammary gland	Solid carcinoma	>8years	Mixed breed
82	2013	P5623238	D13-055	canine	ลำดวน	Female	Cocker Spanial	9	Mass at mammary gland	Mixed mammary gland tumor	>8years	Purebred
83	2013	P5623445	D13-113	canine	เข็มทอง	Female	mixed	10	Mass at mammary gland	Fibrosarcoma	>8years	Mixed breed
84	2013	P5623354	D13-077	canine	นิล	Female	mixed	10	Mass at mammary gland	Anaplastic carcinoma	>8years	Mixed breed
85	2013	P5626380	D13-991	canine	ปีโป้	Female	mixed	10	Mass at mammary gland	complex carcinoma	>8years	Mixed breed
86	2013	P5626331	D13-957	canine	โอรีโอ้	Female	Labrador Retriever	9	Mass at mammary gland	Tubulopapillary carcinoma	>8years	Purebred
87	2013	P5623995	D13-1037	canine	สีสวาท	Female	Chihuahua	14	Mass at mammary gland	complex carcinoma	>8years	Purebred
88	2013	P5626793	D13-1095	canine	น้องใหม่	Female	mixed	6	Mass at mammary gland	Simple carcinoma	≤8years	Mixed breed
89	2013	P5626236	D13-927	canine	ไวท์	Female	mixed	6	Mass at mammary gland	Malignant mixed tumor	≤8years	Mixed breed
90	2013	P5626830	D13-1122	canine	จูเนียร์	Female	Poodle	8	Mass at mammary gland	Malignant mixed tumor	≤8years	Purebred
91	2013	P5626895	D13-1132	canine	เอมมิลี	Female	Beagle	8	Mass at mammary gland	Mammary gland adenocarcinoma	≤8years	Purebred
92	2013	P5626925	D13-1133	canine	เลน	Female	Mixed	14	Mass at mammary gland	fibrosarcoma	>8years	Mixed breed
93	2013	P5624378	D13-368	canine	ขี้เหร่	Female	Mixed	10	Mass at mammary gland	Mixed mammary gland tumor	>8years	Mixed breed
94	2013	P5624442	D13-412	canine	สดใส	Female	pug	7	Mass at mammary gland	Tubulopapillary carcinoma	≤8years	Purebred
95	2013	P5624245	D13-318	canine	ซินดี้	Female	mixed	11	Mass at mammary gland	complex carcinoma	>8years	Mixed breed
96	2013	P5624724	D13-487	canine	จีน่า	Female	Poodle	10	Mass at mammary gland	Tubulopapillary carcinoma	>8years	Purebred
97	2013	P5410982	D13-416	canine	ฟักทอง	Female	shitzu	11	Mass at mammary gland	Squamous cell metaplasia of mammary gland	>8years	Purebred
98	2013	P5410609	D13-574	Feline	แตงโม	Female	DSH	13	Mass at mammary gland	Solid carcinoma	>8years	Mixed breed
99	2013	P5624992	D13-552	canine	เนเน่	Female	Poodle	9	Mass at mammary gland	malignant mixed mammary glant tumor	>8years	Purebred
100	2013	P5412732	D13-546	canine	จ๊อบเเจ๊บ	Female	Poodle	9	Mass at mammary gland	Tubulopapillary carcinoma	>8years	Purebred
101	2013	P5410759	D13-601	canine	บีโธเฟ่น	Female	mixed	13	Mass at mammary gland	complex carcinoma	>8years	Mixed breed
102	2013	P5303103	D13-474	canine	เเดง	Female	mixed	13	Mass at mammary gland	Solid carcinoma	>8years	Mixed breed
104	2013	P5627914	D13-1406	canine	โอเลี้ยง	Female	Poodle	7	Mass at mammary gland	Benign mixed tumor	≤8years	Purebred
105	2013	P5626055	D13-850	canine	จิ่งหง	Female	Poodle	10	Mass at mammary gland	Solid carcinoma (Complex type)	>8years	Purebred
106	2013	P5626002	D13-845	canine	จุ๊บจิ๊บ	Female	mixed	8	Mass at mammary gland	Tubulopapillary carcinoma	≤8years	Mixed breed
107	2013	P5625264	D13-751	canine	ลำไย	Female	Poodle	16	Mass at mammary gland	Simple carcinoma (Solid carcinoma)	>8years	Purebred
108	2013	P5626066	D13-860	canine	หมูหยอง	Female	Poodle	10	Mass at mammary gland	Osteosarcoma	>8years	Purebred
109	2013	P5626068	D13-857	canine	ตูมตาม	Female	mixed	9	Mass at mammary gland	Simple carcinoma (Anaplastic type)	>8years	Mixed breed
110	2013	P5625743	D13-783	canine	โอโม่	Female	mixed	10	Mass at mammary gland	Squamous cell carcinoma	>8years	Mixed breed
111	2013	P5627112	D13-1195	Feline	เเม้ว	Female	DSH	8	Mass at mammary gland	Tubulopapillary carcinoma	≤8years	Mixed breed
112	2013	P5307245	D13-1202	canine	เจี้ยว	Female	mixed	10	Mass at mammary gland	Malignant mixed tumor	>8years	Mixed breed
114	2013	P5627214	D13-1227	canine	เจสซี่	Female	Golden Retriever	11	Mass at mammary gland	Tubulopapillary carcinoma	>8years	Purebred
115	2013	P5522111	D13-1199	canine	ลักกี้	Female	Labrador Retriever	4	Mass at mammary gland	Benign mixed tumor	≤8years	Purebred
116	2013	P5628065	D13-1453	canine	Donut	Female	mixed	14	Mass at mammary gland	Simple carcinoma (Anaplastic type)	>8years	Mixed breed
117	2013	P5627222	D13-1264	canine	อองฟอง	Female	Poodle	16	Mass at mammary gland	Simple carcinoma (Anaplastic type)	>8years	Purebred
118	2013	P5627309	D13-1265	canine	เพชร	Male	mixed	11	Mass at mammary gland	Simple carcinoma (Anaplastic type)	>8years	Mixed breed
119	2013	P5628284	D13-1525	Feline	เเจ๊กการิน	Female	DSH	6	Mass at mammary gland	Tubulopapillary carcinoma	≤8years	Mixed breed
120	2013	P5628052	D13-1486	canine	น้ำหวาน	Female	mixed	6	Mass at mammary gland	complex carcinoma	≤8years	Mixed breed
121	2013	P5625411	D13-1456	canine	น้ำตาล	Female	mixed	10	Mass at mammary gland	Tubulopapillary carcinoma	>8years	Mixed breed
122	2013	P5627976	D13-1440	canine	หนูเล็ก	Female	Poodle	9	Mass at mammary gland	Cystadenocarcinoma	>8years	Purebred
123	2013	P5627980	D13-1438	canine	ขนุน	Female	Golden Retriever	7	Mass at mammary gland	Cystadenocarcinoma	≤8years	Purebred
124	2013	P5517531	D13-1475	canine	สีหมอก	Female	Golden Retriever	10	Mass at mammary gland	complex carcinoma	>8years	Purebred
125	2013	P5414249	D13-1487	canine	ลาล่า	Female	Labrador Retriever	11	Mass at mammary gland	Simple carcinoma (Anaplastic type)	>8years	Purebred
126	2013	P5627734	D13-1354	canine	แฟนต้า	Female	Mixed	10	Mass at mammary gland	complex carcinoma	>8years	Mixed breed
130	2014	P5521003	D14-065	canine	โฟกัส	Female	mixed	15	Mass at mammary gland	Simple carcinoma (Anaplastic type) with sclerosis	>8years	Mixed breed
132	2014	P5729620	D14-127	canine	ฟิว	Female	Mixed	10	Mass at mammary gland	Simple carcinoma(Tubulopapillary type)	>8years	Mixed breed
133	2014	P5305422	D14-159	canine	ฟอร์ต	Female	Poodle	3	Mass at mammary gland	Cystadenocarcinoma	≤8years	Purebred
134	2014	P5729766	D14-252	canine	เเมมโม้	Female	Mixed	12	Mass at mammary gland	Simple carcinoma(Solid type)	>8years	Mixed breed
135	2014	P5729745	D14-173	Feline	น้องพลอย	Male	DSH	16	Mass at mammary gland	Malignant mixed tumor	>8years	Mixed breed
136	2014	P5729271	D14-081	canine	บะหมี่	Female	Golden Retriever	10	Mass at mammary gland	Simple carcinoma(Solid type)	>8years	Purebred
137	2014	P5302234	D14-082	canine	น้ำตาล	Female	Cocker Spanial	6	Mass at mammary gland	Benign mixed tumor	≤8years	Purebred
138	2014	P5730317	D14-321	canine	มีมี่	Female	Shitzu	11	Mass at mammary gland	Simple carcinoma(Solid type)	>8years	Purebred
139	2014	P5729335	D14-047	canine	ไมโล	Female	Mixed	10	Mass at mammary gland	Simple carcinoma(Solid type)	>8years	Mixed breed
141	2014	P5733760	D14-1440	canine	อรอิน	Female	Mixed	5	Mass at mammary gland	Fibrosarcoma	≤8years	Mixed breed
142	2014	P5735635	D14-2115	Feline	ข้าวกล่ำ	Female	American shorthair	8 mo	Mass at mammary gland	Mammary gland adenoma	≤8years	Purebred
143	2014	P5729975	D14-300	canine	มู่หยง	Female	Golden Retriever	5	Mass at mammary gland	Fibroma	≤8years	Purebred
144	2014	P5627868	D14-1766	canine	ไอดอล	Female	Pomeranian	9	Mass at mammary gland	Carcinoma in Situ	>8years	Purebred
145	2014	P5733695	D14-1463	Feline	เบบี้	Female	Persian	9	Mass at mammary gland	Cystadenocarcinoma	>8years	Purebred
146	2014	P5734140	D14-1574	canine	ทองขาว	Female	Mixed	12	Mass at mammary gland	Simple carcinoma(Solid type)	>8years	Mixed breed
147	2014	P5732057	D14-1292	canine	เต้าฮวย	Female	Mixed	8	Mass at mammary gland	Simple carcinoma (Anaplastic type)	≤8years	Mixed breed
148	2014	P5518048	D14-1402	canine	สำลี	Female	Mixed	12	Mass at mammary gland	Squamous cell carcinoma	>8years	Mixed breed
149	2014	P5734951	D14-1826	canine	มีโชค	Female	Shitzu	17	Mass at mammary gland	Simple carcinoma(Tubulopapillary type)	>8years	Purebred
150	2014	P5300810	D14-1825	canine	ดาวเรือง	Female	Poodle	6	Mass at mammary gland	Simple carcinoma (Anaplastic type)	≤8years	Purebred
151	2014	P5625032	D14-1975	canine	ถุงเท้า	Female	Mixed	10	Mass at mammary gland	Complex adenocarcinoma	>8years	Mixed breed
152	2014	P5735985	D14-2148	canine	บุญอุ้ม	Female	Poodle	12	Mass at mammary gland	Complex adenoma	>8years	Purebred
153	2014	P5736441	D14-2252	canine	โบนัส	Female	Shitzu	9	Mass at mammary gland	Benign mixed tumor	>8years	Purebred
154	2014	P5306811	D14-695	canine	ชมพู่	Female	Poodle	10	Mass at mammary gland	Complex carcinoma	>8years	Purebred
155	2014	P5732325	D14-947	canine	คุ๊กกี้	Female	Poodle	10	Mass at mammary gland	Simple carcinoma(Tubulopapillary type)	>8years	Purebred
157	2014	P5730750	D14-479	canine	โกโก้	Female	Mixed	6	Mass at mammary gland	Simple carcinoma(Solid type)	≤8years	Mixed breed
158	2014	P5729954	D14-529	canine	หยินหยาง	Female	Pug	11	Mass at mammary gland	Complex carcinoma	>8years	Purebred
159	2014	P5304239	D14-594	canine	ดุกดิก	Female	Poodle	9	Mass at mammary gland	Simple carcinoma(Solid type)	>8years	Purebred
160	2014	P5730866	D14-629	canine	Happy	Female	Poodle	10	Mass at mammary gland	Benign mixed tumor	>8years	Purebred
161	2014	P5731026	D14-575	Feline	ไข่มุก	Female	DSH	10	Mass at mammary gland	Simple carcinoma(Solid type)	>8years	Mixed breed
162	2014	P5627765	D14-689	canine	ไข่พะโล้	Female	Cocker Spanial	10	Mass at mammary gland	Simple carcinoma (Anaplastic type)	>8years	Purebred
163	2014	P5731551	D14-748	canine	อ้อยควั่น	Female	Poodle	7	Mass at mammary gland	Complex adenoma	≤8years	Purebred
164	2014	P5730840	D14-702	Feline	นวล	Female	DSH	1	Mass at mammary gland	Simple carcinoma(Tubulopapillary type)	≤8years	Mixed breed
165	2014	P57300311	D14-320	canine	หนุงหนิง	Female	Mixed	9	Mass at mammary gland	Malignant mixed tumor	>8years	Mixed breed
166	2014	P5730020	D14-247	canine	ฟักทอง	Female	Shitzu	14	Mass at mammary gland	Tubulopapillary carcinoma	>8years	Purebred
167	2014	P5519910	D14-1955	canine	รถถัง	Female	Bull dog	13	Mass at mammary gland	Squamous cell carcinoma	>8years	Purebred
168	2014	P5732017	D14-863	canine	เลดี้	Female	Mixed	15	Mass at mammary gland	Simple carcinoma (Anaplastic type)	>8years	Mixed breed
169	2014	P5733545	D14-1363	canine	ปุกปุย	Female	Spitz	15	Mass at mammary gland	Complex adenoma	>8years	Purebred
170	2014	P5307767	D14-1573	canine	ปังปิ้ง	Female	Mixed	10	Mass at mammary gland	Cystadenoma	>8years	Mixed breed
171	2014	P5733788	D14-1507	canine	บุษบา	Female	Poodle	14	Mass at mammary gland	Complex carcinoma	>8years	Purebred
172	2014	P5734151	D14-1589	canine	โดนัท	Female	Mixed	10	Mass at mammary gland	Cystadenocarcinoma	>8years	Mixed breed
173	2014	P5729548	D14-100	canine	แพม	Female	Mixed	5	Mass at mammary gland	Simple carcinoma(Solid type)	≤8years	Mixed breed
174	2014	P5733456	D14-1366	canine	โซดา	Female	Poodle	7	Mass at mammary gland	Simple carcinoma(Tubulopapillary type)	≤8years	Purebred
175	2014	P5629072	D13-1770	canine	จินนี่	Female	Poodle	13	Mass at mammary gland	Simple carcinoma(Tubulopapillary type)	>8years	Purebred
176	2014	P5732356	D14-995	canine	ถุงทอง	Female	Mixed	10	Mass at mammary gland	Tubulopapillary carcinoma	>8years	Mixed breed
177	2014	P5732558	D14-1059	canine	ปุ๊กปิ๊ก	Female	Shitzu	11	Mass at mammary gland	Simple carcinoma (Anaplastic type)	>8years	Purebred
178	2014	P5300993	D14-1141	canine	บุญมาร์	Female	Yorkshire Terrier	11	Mass at mammary gland	Simple carcinoma(Solid type)	>8years	Purebred
179	2014	P5732508	D14-1001	canine	เป๊ปซี่	Female	Poodle	5	Mass at mammary gland	Complex carcinoma	≤8years	Purebred
181	2014	P5732178	D14-905	canine	ทองทอง	Female	Mixed	10	Mass at mammary gland	Tubulopapillary carcinoma	>8years	Mixed breed
182	2014	P5732174	D14-906	canine	ขวัญตา	Female	Poodle	7	Mass at mammary gland	Complex carcinoma	≤8years	Purebred
183	2014	P5732849	D14-1164	canine	ผักกาด	Female	mixed	5	Mass at mammary gland	Simple carcinoma (Anaplastic type)	≤8years	Mixed breed
184	2014	P5411562	D14-2038	canine	ถุงเงิน	Female	French bulldog	5	Mass at mammary gland	Simple carcinoma(Solid carcinoma)	≤8years	Purebred
185	2014	P5735821	D14-2078	canine	เเอบ	Female	Mixed	8	Mass at mammary gland	Fibrosarcoma	≤8years	Mixed breed
187	2014	P5517408	D14-341	canine	นิลกาฬ	Female	Poodle	14	Mass at mammary gland	Simple carcinoma (Anaplastic type)	>8years	Purebred	Malignant
188	2015	P5843374	D15-2363	canine	ปีใหม่	Female	Bangkaew	12	Mass at mammary gland	Simple carinoma (Solid type)	>8years	Purebred	Malignant
190	2015	P5733257	D15-2844	Canine	โมโม่จัง	Female	Shitzu	15	Mass at mammary gland	Simple carcinoma ( Tubulopapillary type)	>8years	Purebred
191	2015	P5844833	D15-2886	Canine	เเมม	Female	Mixed	15	Mass at mammary gland	Spindle cell carcinoma	>8years	Mixed breed
192	2015	P5520530	D15-0427	Canine	เกี๊ยวซ่า	Female	Cocker Spanial	10	Mass at mammary gland	Complex carcinoma	>8years	Purebred
193	2015	P5837125	D15-229	Canine	เลดี้	Female	Poodle	8	Mass at mammary gland	Tubulopapillary carcinoma	≤8years	Purebred
194	2015	P5836830	D15-0212	Canine	สุมาลี	Female	Poodle	10	Mass at mammary gland	Complex carcinoma	>8years	Purebred
195	2015	P5414692	D15-2142	Canine	น้ำพริกอ่อง	Female	Labrador Retriever	10	Mass at mammary gland	Squamous cell carcinoma	>8years	Purebred
196	2015	P5300620	D15-2400	Canine	เเตงกวา	Female	Poodle	9	Mass at mammary gland	Simple carcinoma ( Tubulopapillary type)	>8years	Purebred
197	2015	P5840774	D15-2270	Canine	ถุงทอง	Female	Mixed	4	Mass at mammary gland	Simple carinoma (Solid type)	≤8years	Mixed breed
198	2015	P5835924	D15-1087	Canine	นู๋ดี	Female	Pug	2	Mass at mammary gland	Mammary gland cystadenoma	≤8years	Purebred
199	2015	P5628665	D15-2066	Canine	ข้าวเเตน	Female	Poodle	7	Mass at mammary gland	Benign mixed mammary gland tumor	≤8years	Purebred
200	2015	P5841161	D15-1520	Canine	บ๊อบบี้	Female	Mixed	12	Mass at mammary gland	Simple carinoma (Solid type)	>8years	Mixed breed
201	2015	P5729241	D15-0585	Canine	หนูดำ	Female	Mixed	15	Mass at mammary gland	Simple carcinoma ( Tubulopapillary type)	>8years	Mixed breed
202	2015	P5837728	D15-0418	Canine	เปอรติ้ส	Female	Shitzu	15	Mass at mammary gland	Simple carinoma (Solid type)	>8years	Purebred
203	2015	P5841851	D15-1807	Canine	เจ้าหมี	Female	Mixed	10	Mass at mammary gland	Fibrosarcoma	>8years	Mixed breed
205	2015	P5837529	D15-0417	Canine	พลอย	Female	Shitzu	9	Mass at mammary gland	Simple carcinoma ( Tubulopapillary type)	>8years	Purebred
206	2015	P5839672	D15-1482	Canine	น้ำหวาน	Female	Poodle	11	Mass at mammary gland	Mammary glnad adenoma	>8years	Purebred
207	2015	P5521244	D15-1498	Canine	มอมแมม	Female	mixed	8	Mass at mammary gland	Simple carinoma (Solid type)	≤8years	Mixed breed
208	2015	P5840480	D15-1445	Canine	ฟร้อน	Female	Cocker Spanial	10	Mass at mammary gland	Simple carcinoma (Anaplastic type)	>8years	Purebred
209	2015	P5734522	D14-1709	Canine	หมูหยอง	Female	Shitzu	11	Mass at mammary gland	Complex adenoma	>8years	Purebred
210	2015	P5843179	D15-2318	Canine	แน็ท	Female	Mixed	11	Mass at mammary gland	Benign mixed mammary gland tumor	>8years	Mixed breed
211	2015	P5841898	D15-1961	Canine	จีจี้	Female	Cocker Spanial	11	Mass at mammary gland	Mixed mammary gland tumor	>8years	Purebred
212	2015	P5838056	D15-0495	Canine	เฉาก๊วย	Male	Poodle	15	Mass at mammary gland	Complex carcinoma	>8years	Purebred
213	2015	P5410891	D15-2457	Canine	Smiley	Female	Golden Retriever	6	Mass at mammary gland	Simple carcinoma (cystic-papillary type)	≤8years	Purebred
214	2015	P5837922	D15-0443	Canine	ไข่หวาน	Female	Poodle	9	Mass at mammary gland	Cysadenocarcinoma	>8years	Purebred
215	2015	P5307246	D15-1519	Canine	ไข่เจียว	Female	Poodle	12	Mass at mammary gland	Simple carcinoma ( Tubulopapillary type)	>8years	Purebred
216	2015	P5837434	D15-0401	Feline	มันนี่	Female	DSH	12	Mass at mammary gland	Mammary gland cystadenoma	>8years	Mixed breed
217	2015	P5841074	D15-1496	Canine	โย่	Female	Mixed	9	Mass at mammary gland	Tubulopapillary carcinoma	>8years	Mixed breed
218	2015	P5837319	D15-0261	Canine	ขนมครก	Female	Poodle	10	Mass at mammary gland	Complex carcinoma	>8years	Purebred
219	2015	P5840186	D15-1175	Canine	เเตงโม	Female	Poodle	10	Mass at mammary gland	Simple carcinoma ( Tubulopapillary type)	>8years	Purebred
221	2015	P5838145	D15-0518	Canine	ถั่วเหลือง	Male	American Pitbull Terrier	5	Mass at mammary gland	Simple carcinoma ( Tubulopapillary type)	≤8years	Purebred
222	2015	P5413012	D15-0496	Canine	แทมมี่	Female	Labrador Retriever	7	Mass at mammary gland	Simple carcinoma ( Tubulopapillary type)	≤8years	Purebred
225	2015	P5840431	D15-1246	Canine	แก้ว	Male	Mixed	7	Mass at mammary gland	Simple carcinoma ( Tubulopapillary type)	≤8years	Mixed breed
226	2015		D15-1155	Canine	จิ่งจัง	Female	Shitzu	5	Mass at mammary gland	Complex adenoma	≤8years	Purebred
227	2015	P5840246	D15-1176	Canine	หมีมี้	Female	Poodle	11	Mass at mammary gland	Benign mixed mammary tumor	>8years	Purebred
228	2015	P5839402	D15-1194	Canine	ข้าวปุ้น	Female	Poodle	12	Mass at mammary gland	Simple carcinoma ( Tubulopapillary type)	>8years	Purebred
229	2015	P5840352	D15-1208	Canine	มอมเเมม	Male	Mixed	10	Mass at mammary gland	Simple carcinoma (Solid type)	>8years	Mixed breed
230	2015	P5414384	D15-1685	Canine	จูลี่	Female	Cocker Spanial	9	Mass at mammary gland	Fibrosarcoma	>8years	Purebred
231	2015	P5843197	D15-2319	Canine	ตุ้มเงิน	Female	Poodle	9	Mass at mammary gland	Malignant mixed tumor	>8years	Purebred
232	2015	P5303972	D15-2250	Canine	New	Female	Cocker Spanial	9	Mass at mammary gland	Simple carcinoma (Solid type)	>8years	Purebred
233	2015	P5730867	D15-2251	Canine	น้ำตาล	Female	Shitzu	13	Mass at mammary gland	Simple carcinoma (Solid type)	>8years	Purebred
234	2015	P5841281	D15-1945	Canine	น้องเเบม	Female	Mixed	13	Mass at mammary gland	Basal cell adenoma	>8years	Mixed breed
235	2015	P5841987	D15-1897	Canine	ไทเกอร์	Female	Mixed	7	Mass at mammary gland	Benign mixed mammary gland tumor	≤8years	Mixed breed
236	2015	P5838880	D15-1628	Canine	ปุย	Female	Poodle	15	Mass at mammary gland	Simple carcinoma (Solid type)	>8years	Purebred
237	2015	P5733704	D14-1472	Feline	แม่เเมว	Female	Siamese	10	Mass at mammary gland	Simple carcinoma ( Tubulopapillary type)	>8years	Purebred
238	2014	P5627680	D14-1542	Canine	มู่หลาน	Female	Mixed	6	Mass at mammary gland	Complex carcinoma	≤8years	Mixed breed
239	2015	P5518727	D14-1430	Canine	คิตตี้	Female	Bangkaew	10	Mass at mammary gland	Simple carcinoma (Anaplastic type)	>8years	Purebred
240	2015	P5733898	D14-1498	Canine	จาว่า	Female	Shitzu	12	Mass at mammary gland	Complex adenocarcinoma	>8years	Purebred
241	2015	P5733383	D14-1310	Canine	ปิง	Female	Mixed	13	Mass at mammary gland	Simple carcinoma (Anaplastic type)	>8years	Mixed breed
242	2015	P5838093	D15-0539	Feline	ทอง	Female	DSH	12	Mass at mammary gland	Osteosarcoma	>8years	Mixed breed
243	2015	P5625119	D14-2065	Canine	คิตตี้	Female	Poodle	12	Mass at mammary gland	Cysadenocarcinoma	>8years	Purebred
244	2015	P5732681	D14-1997	Canine	จูเนียร์	Female	Poodle	10	Mass at mammary gland	Lipid-rich mammary carcinoma with lymph node metastasis	>8years	Purebred
245	2015	P5839635	D15-968	Canine	มูมู่	Female	Golden Retriever	7	Mass at mammary gland	Simple carcinoma (Solid type)	≤8years	Purebred
246	2015	P5839145	D15-0813	Canine	แพนดี้	Female	Mixed	14	Mass at mammary gland	Simple carcinoma ( Tubulopapillary type)	>8years	Mixed breed
247	2015	P5839237	D15-0860	Canine	คนอร์	Male	Golden Retriever	8	Mass at mammary gland	Simple carcinoma (Anaplastic type)	≤8years	Purebred
248	2015	P5624706	D15-2190	Canine	คิตตี้	Female	Shitzu	15	Mass at mammary gland	Malignant mixed mammary gland tumor	>8years	Purebred
249	2015	P5842613	D15-2100	Canine	โฟร์มด	Female	Poodle	8	Mass at mammary gland	Benign mixed mammary gland tumor	≤8years	Purebred
250	2015	P5736089	D15-1245	Canine	สำลี	Female	Mixed	5	Mass at mammary gland	Tubulopapillary cystadenoma	≤8years	Mixed breed
252	2015	P5838337	D15-0605	Canine	โม้โม้	Female	Spitz	5	Mass at mammary gland	Simple carinoma (Solid type)	≤8years	Purebred
253	2015	P5409966	D15-1085	Canine	แพนด้า	Female	Golden Retriever	7	Mass at mammary gland	Fibrosarcoma	≤8years	Purebred
254	2015	P5842748	D15-2373	Canine	จิ๊บ	Female	Mixed	9	Mass at mammary gland	Benign mixed mammary gland tumor	>8years	Mixed breed
255	2015	P5518711	D15-2269	Canine	อะตอม	Female	Golden Retriever	12	Mass at mammary gland	Benign mixed mammary tumor	>8years	Purebred
257	2015	P5843790	D15-2496	Canine	ใบเตย	Female	Shitzu	6	Mass at mammary gland	Simple carcinoma (Solid type)	≤8years	Purebred
258	2015	P5839781	D15-2498	Canine	มดส้ม	Female	Cocker Spanial	11	Mass at mammary gland	Simple carinoma (Solid type)	>8years	Purebred
259	2015	P5839520	D15-1041	Canine	เจ้าหล่อน	Female	Shitzu	14	Mass at mammary gland	Cystadenocarcinoma	>8years	Purebred
260	2015	P5842464	58 B 239	Canine	พุดดิ้ง	Female	Mixed	10	Mass at mammary gland	Simple tubular adenocarcinoma	>8years	Mixed breed
261	2015	P5410883	58 B 188	Canine	ร็อกกี้	Female	Mixed	10	Mass at mammary gland	Benign mixed mammary tumor	>8years	Mixed breed
262	2016	P5948092	D16-1048	Canine	เดอะวัน	Female	Siberian Husky	13	Mass at mammary gland	Simple carcinoma ( Tubulopapillary type)	>8years	Purebred
263	2016	P5951391	D16-2470	Canine	หลง	Female	Mixed	10	Mass at mammary gland	Simple carcinoma ( Tubulopapillary type)	>8years	Mixed breed
264	2016	P5952277	D16-2761	Canine	กล้วยหอม	Female	Siberian Husky	8	Mass at mammary gland	Simple carcinoma ( Tubulopapillary type)	≤8years	Purebred
265	2016	P5950386	D16-2004	Canine	หลง	Female	Mixed	10	Mass at mammary gland	Simple carcinoma ( Tubulopapillary type)	>8years	Mixed breed
266	2016	P5946142	D16-0495	Canine	มันนี่	Female	Poodle	10	Mass at mammary gland	Benign mixed mammary gland tumor, Osteosarcoma	>8years	Purebred
267	2016	P5947606	D16-0888	Canine	มีสุข	Female	Mixed	8	Mass at mammary gland	Osteosarcoma	≤8years	Mixed breed
268	2016	P5950259	D16-1938	Canine	ปุ้มปุ้ย	Female	Mixed	15	Mass at mammary gland	Simple carcinoma ( Solid type)	>8years	Mixed breed
269	2016	P5842149	D16-0909	Canine	ลีลี่	Female	Golden Retriever	11	Mass at mammary gland	Simple carcinoma ( Solid type)	>8years	Purebred
270	2016	P5623392	D16-0165	Canine	ยุหว่า	Female	Mixed	9	Mass at mammary gland	Simple carcinoma ( Solid type)	>8years	Mixed breed
271	2016	P5949942	D16-1875	Canine	จุ๊บเเจง	Female	Mixed	14	Mass at mammary gland	Complex carcinoma, Mixed mammary gland tumor	>8years	Mixed breed
272	2016	P5945591	D16-0297	Canine	Baby	Female	German Shepherd	9	Mass at mammary gland	Benign mixed mammary gland tumor	>8years	Purebred
273	2016	P5736483	D16-0768	Canine	โคล่า	Female	Shitzu	11	Mass at mammary gland	Benign mixed mammary gland tumor	>8years	Purebred
274	2016	P5945957	D16-0683	Canine	เดย์ซี่	Female	Labrador Retriever	10	Mass at mammary gland	Benign mixed mammary gland tumor	>8years	Purebred
275	2016	P5301412	D16-1620	Canine	เเม๊ว	Female	Poodle	15	Mass at mammary gland	Benign mixed mammary gland tumor	>8years	Purebred
276	2016	P5844663	D16-1854	Canine	จ๊ะโอ๋	Female	Shitzu	11	Mass at mammary gland	Simple carcinoma (anaplastic type)	>8years	Purebred
277	2016	P5843665	D16-1888	Canine	ขาหมู	Female	Spitz	12	Mass at mammary gland	Simple carcinoma ( Solid type) with cyst	>8years	Purebred
278	2016	P5950248	D16-1939	Canine	ชินล่า	Female	Shitzu	4	Mass at mammary gland	Mixed mammary gland tumor	≤8years	Purebred
279	2016	P5951632	D16-2493	Canine	หมูปิ้ง	Female	Mixed	9	Mass at mammary gland	Simple carcinoma ( Solid type)	>8years	Mixed breed
280	2016	P5623358	D16-3037	Canine	มินนี่	Female	Mixed	10	Mass at mammary gland	Fibrosarcoma	>8years	Mixed breed
281	2016	P5946578	D16-2729	Canine	น้องเเบม	Female	Poodle	10	Mass at mammary gland	Adrenocarcinoma	>8years	Purebred
282	2016	P5952027	D16-2643	Canine	เฉาก๊วย	Female	Poodle	10	Mass at mammary gland	Simple carcinoma ( Tubulopapillary type)	>8years	Purebred
283	2016	P5952009	D16-2642	Canine	Lucky	Female	Mixed	14	Mass at mammary gland	Complex carcinoma was highly suspected	>8years	Mixed breed
284	2016	P5730761	D16-1543	Canine	น้องดำ	Female	Mixed	14	Mass at mammary gland	Mixed mammary gland tumor	>8years	Mixed breed
285	2016	P5949471	D16-1685	Canine	จินนี่	Female	Chihuahua	11	Mass at mammary gland	Simple carcinoma ( Solid type)	>8years	Purebred
287	2016	P5949736	D16-1828	Canine	ลินลิน	Female	Chow Chow	10	Mass at mammary gland	Mixed mammary gland tumor	>8years	Purebred
288	2016	P5950322	D16-2155	Canine	เอาว์ฟี่	Female	Shitzu	10	Mass at mammary gland	Simple carcinoma ( Solid type)	>8years	Purebred
289	2016	P5951105	D16-2279	Canine	Gogo	Female	Mixed	10	Mass at mammary gland	Complex carcinoma	>8years	Mixed breed
290	2016	P5950174	D16-1937	Canine	พริกไทย	Female	Poodle	3	Mass at mammary gland	Mixed mammary gland tumor	≤8years	Purebred
291	2016	P5949220	D16-1903	Canine	ปุ้มปุ้ย	Female	Mixed	10	Mass at mammary gland	Simple carcinoma ( Solid type)	>8years	Mixed breed
292	2016	P5949231	D16-1654	Canine	กะทิ	Female	Mixed	10	Mass at mammary gland	Simple carcinoma ( Solid type)	>8years	Mixed breed
293	2016	P5949196	D16-1545	Canine	ดวง	Female	Mixed	12	Mass at mammary gland	Simple carcinoma ( Solid type)	>8years	Mixed breed
294	2016	P5949637	D16-1800	Canine	เปอร์เซีย	Female	Shitzu	3	Mass at mammary gland	Complex carcinoma	≤8years	Purebred
295	2016	P5624913	D16-1405	Canine	มีมี่	Female	Yorkshire Terrier	10	Mass at mammary gland	Simple carcinoma ( Solid type)	>8years	Purebred
296	2016	P5949611	D16-1572	Canine	อิฐ	Female	Mixed	15	Mass at mammary gland	Simple carcinoma ( Anaplastic type) with inguinal lymph node metastasis	>8years	Mixed breed
297	2016	P5948703	D16-1339	Canine	ยุกยิก	Female	Mixed	14	Mass at mammary gland	Simple carcinoma ( Solid type)	>8years	Mixed breed
298	2016	P5946324	D16-0524	Canine	น้ำตาล	Female	Mixed	9	Mass at mammary gland	Benign mixed mammary gland tumor	>8years	Mixed breed
299	2016	P5520090	D16-0821	Canine	เฮง เฮง	Female	Shitzu	12	Mass at mammary gland	Simple carcinoma (Tubulopapillary carcinoma)	>8years	Purebred
300	2016	P5947802	D16-0978	Canine	เปปซี่	Female	Shitzu	10	Mass at mammary gland	Simple carcinoma (Solid type)	>8years	Purebred
301	2016	P5947039	D16-0810	Canine	ฟักทอง	Female	Shitzu	13	Mass at mammary gland	Simple carcinoma (anaplastic carcinoma)	>8years	Purebred
302	2016	P5947011	D16-1022	Canine	น้ำตาล	Female	Mixed	9	Mass at mammary gland	Benign mixed mammary gland tumor	>8years	Mixed breed
303	2016	P5945833	D16-0512	Canine	ดุ๊กดิ๊ก	Female	Mixed	12	Mass at mammary gland	Complex carcinoma	>8years	Mixed breed
304	2016	P5947536	D16-0911	Canine	จินนี่	Female	Poodle	6	Mass at mammary gland	Complex carcinoma	≤8years	Purebred
305	2016	P5302592	D16-0684	Canine	หมีพูห์	Female	Mixed	12	Mass at mammary gland	Complex carcinoma	>8years	Mixed breed
306	2016	P5948328	D16-1188	Canine	น้องนัวร์	Female	Dachshund	11	Mass at mammary gland	Simple adenoma	>8years	Purebred
308	2016	P5412869	D16-0496	Canine	โฟม	Female	Cocker Spanial	10	Mass at mammary gland	Noninfiltrating(in Situ) carcinomas	>8years	Purebred
309	2016	P5946134	D16-0455	Canine	เเป๊ปซี่	Female	German Shepherd	11	Mass at mammary gland	Benign mixed mammary gland tumor	>8years	Purebred
310	2016	P5414747	D16-1233	Canine	ปังญ่า	Female	Golden Retriever	8	Mass at mammary gland	Benign mixed mammary gland tumor	≤8years	Purebred
311	2016	P5520250	D16-1689	Canine	ถุงเงิน	Female	Poodle	9	Mass at mammary gland	Simple carcinoma ( Anaplastic type)	>8years	Purebred
313	2017	P5730390	D14-355	canine	กุ้ยช่าย	female	shitzu	7	Mass at mammary gland	complex carcinoma	≤8years	Purebred
314	2017	P6008123	D17-1990	Canine	เเบล็ก	female	Mixed	14	Mass at mammary gland	Simple carcinoma (Solid pattern, tubulopapillary pattern)	>8years	Mixed breed
315	2017	P6009249	D17-2451	Canine	คิม	female	Mixed	13	Mass at mammary gland	Simple carcinoma (Solid type)	>8years	Mixed breed
316	2017	P6008893	D17-2303	Canine	เกมส์	female	Shitzu	9	Mass at mammary gland	Simple carcinoma (tubulopapillary type)	>8years	Purebred
317	2017	P6008760	D17-2234	Canine	พิบี้	female	Siberian Husky	9	Mass at mammary gland	Simple carcinoma (tubulopapillary type)	>8years	Purebred
318	2017	P5731728	D17-1089	Canine	พลอย	female	Yorkshire Terrier	7	Mass at mammary gland	Simple carcinoma (tubulopapillary type)	≤8years	Purebred
319	2017	P5950453	D17-0225	Canine	จีจี้	female	Shitzu	10	Mass at mammary gland	Complex carcinoma	>8years	Purebred
320	2017	P59101000045	D17-0085	Canine	ปุย	Female	Mixed	14	Mass at mammary gland	Simple carcinoma (tubulopapillary type)	>8years	Mixed breed
321	2017	P6002554	D17-0152	Canine	แป๊ปซี่	female	Poodle	10	Mass at mammary gland	Simple carcinoma (tubulopapillary type)	>8years	Purebred
322	2017	P6011228	D17-3032	Canine	โป่งเหน่ง	female	Mixed	10	Mass at mammary gland	Complex carcinoma	>8years	Mixed breed
323	2017	P6006924	D17-1536	Canine	อุ๋งอิ๋ง	female	Poodle	11	Mass at mammary gland	Benign mixed mammary gland tumor	>8years	Purebred
324	2017	P6004619	D17-0938	Canine	มูมู่	female	Mixed	9	Mass at mammary gland	Complex carcinoma	>8years	Mixed breed
325	2017	P6003336	D17-1551	Canine	ชิชา	female	Mixed	12	Mass at mammary gland	Simple carcinoma (tubulopapillary type)	>8years	Mixed breed
327	2017	P6004892	D17-0926	Canine	หมูแฮม	female	Mixed	9	Mass at mammary gland	Mixed mammary gland tumor	>8years	Mixed breed
328	2017	P6003465	D17-0653	Feline	เบบี้	female	Persian	11	Mass at mammary gland	Simple carcinoma (tubulopapillary type)	>8years	Purebred
330	2017	P6003526	D17-0552	Feline	อ้วน	female	DSH	14	Mass at mammary gland	Simple carcinoma (tubulopapillary type)	>8years	Mixed breed
331	2017	P6012042	D17-3231	Canine	มูมู่	female	Pug	10	Mass at mammary gland	Simple carcinoma (Solid type)	>8years	Purebred
332	2017	P6007872	D17-1892	Canine	ข้าวเม่า	female	Mixed	10	Mass at mammary gland	Squamous cell carcinoma (SCC)	>8years	Mixed breed
333	2017	P5303917	D17-3021	Canine	น้ำชา	female	Labrador Retriever	7	Mass at mammary gland	Simple carcinoma (Solid type)	≤8years	Purebred
334	2017	P6007895	D17-2279	Feline	ญาญ่า	female	Persian	8 mo	Mass at mammary gland	Simple adenoma	≤8years	Purebred
335	2017	P5843375	D17-0015	Canine	ฟักทอง	female	German Shepherd	12	Mass at mammary gland	Simple adenoma with cyst	>8years	Purebred
336	2017	P6005484	D17-1784	Canine	น้ำตาล	female	Mixed	8	Mass at mammary gland	Fibrosarcoma	≤8years	Mixed breed
337	2017	P6004074	D17-0708	Canine	แนนซี่	female	Jack Russell	9	Mass at mammary gland	Benign mixed mammary gland tumor	>8years	Purebred
338	2017	P5623207	D17-1070	Canine	อุ่นเรือน	female	Poodle	14	Mass at mammary gland	Osteosarcoma	>8years	Purebred
339	2017	P6006478	D17-1434	Canine	หมูแดง	female	Mixed	7	Mass at mammary gland	Benign mixed mammary gland tumor	≤8years	Mixed breed
340	2017	P6006206	D17-1396	Canine	จู้จี้	female	Mixed	6	Mass at mammary gland	Benign mixed mammary gland tumor	≤8years	Mixed breed
341	2017	P6010546	D17-2820	Canine	อีปี้	female	Mixed	10	Mass at mammary gland	Simple carcinoma (anaplastic type)	>8years	Mixed breed
342	2017	P5901439	D17-0425	Canine	ชบา	female	Miniature	12	Mass at mammary gland	Simple carcinoma (Solid type)	>8years	Purebred
343	2017	P6009382	D17-2478	Canine	เศรษฐี	female	Poodle	12	Mass at mammary gland	Simple carcinoma (anaplastic type)	>8years	Purebred
344	2017	P6009273	D17-2512	Canine	ไข่ดาว	female	Shitzu	10	Mass at mammary gland	Simple carcinoma (Solid type)	>8years	Purebred
345	2017	P5842178	D17-2711	Canine	น้องกล้วยหอม	female	Poodle	11	Mass at mammary gland	Complex carcinoma	>8years	Purebred
346	2017	P6009124	D17-2759	Canine	เงิน	female	Mixed	7	Mass at mammary gland	Simple carcinoma (anaplastic type)	≤8years	Mixed breed
347	2017	P6010981	D17-2924	Canine	มะลิ	female	Bangkaew	7	Mass at mammary gland	Simple carcinoma (Solid type)	≤8years	Purebred
348	2018	P6116778	D18-1301	Canine	ทีน่า	Female	Mixed	10	Mass at mammary gland	Papillary cystic adenocarcinoma with suppurative mastitis	>8years	Mixed breed
349	2018	P5902030	CHM370	Feline	มั่งมี	Female	DSH	8	Mass at mammary gland	Simple tubular carcinoam grade 2	≤8years	Mixed breed
350	2018	P5901375	CHM125	Canine	ลูกชิ้น	Female	Poodle	8	Mass at mammary gland	Simple tubular adenocarcinoma Grade 2	≤8years	Purebred
352	2018	P6114137	CHM126	Feline	Tingerbell	Female	Persian	7	Mass at mammary gland	Simple papillary adenoma	≤8years	Purebred
353	2018	P6115533	CHM174	Canine	จิกปิก	Female	Mixed	15	Mass at mammary gland	Extraskeletal osteosarcoma	>8years	Mixed breed
354	2018	P5516944	CHM331	Canine	ปองปอง	Female	Poodle	9	Mass at mammary gland	Benign mixed mammary gland tumor	>8years	Purebred
355	2018	P6117248	CHM480	Canine	ใบเงิน	Female	Shitzu	8	Mass at mammary gland	Papillary cystic adenocarcinoma grade 2	≤8years	Purebred
356	2018	P61133195	CHM062	Feline	ตาหวาน	Female	DSH	12	Mass at mammary gland	Simple tubulo-papillary adenocarcinoma	>8years	Mixed breed
357	2018	P6119046	CHM439	Canine	มอมแมม	Female	Mixed	11	Mass at mammary gland	Simple papillary cystic adenoma	>8years	Mixed breed
358	2018	P6008725	D18-2025	Canine	น้องเชลซี	Female	Shitzu	7	Mass at mammary gland	Complex mammary carcinoma	≤8years	Purebred
359	2018	P6113115	D18-0267	Canine	ฟ้าใส	Female	Poodle	10	Mass at mammary gland	Simple carcinoma (tubulopapillary pattern)	>8years	Purebred
360	2018	P6113378	D18-0367	Canine	จังกึม	Female	Poodle	11	Mass at mammary gland	Osteosarcoma	>8years	Purebred
361	2018	P6113663	D18-0460	Canine	พัตต์	Female	Chihuahua	10	Mass at mammary gland	Mixed mammary gland tumor	>8years	Purebred
362	2018	P6113802	D18-0492	Canine	แหม่ม	Female	Poodle	11	Mass at mammary gland	Simple carcinoma (tubulopapillary pattern)	>8years	Purebred
363	2018	P6112369	D18-0511	Canine	มะลิ	Female	Poodle	12	Mass at mammary gland	Complex carcinoma	>8years	Purebred
364	2018	P6114103	D18-0573	Canine	ทอง	Female	Golden Retriever	6	Mass at mammary gland	Compex carcinoma	≤8years	Purebred
365	2018	P6114290	D18-0645	Canine	บุ๋มบิ๋ม	Female	Poodle	8	Mass at mammary gland	Simple carcinoma (tubulopapillary pattern)	≤8years	Purebred
366	2018	P5521778	D18-2184	Canine	คุกกี้	Female	Poodle	7	Mass at mammary gland	Mammary mixed tumor	≤8years	Purebred
367	2018	P6006059	D18-2254	Canine	ถุงทอง	Female	Mixed	11	Mass at mammary gland	Mammary mixed tumor	>8years	Mixed breed
368	2018	P6119671	D18-2519	Canine	ข้าวปั้น	Female	Poodle	7	Mass at mammary gland	Mammary mixed tumor	≤8years	Purebred
369	2018	P6119594	D18-2560	Canine	มีมี่	Female	Poodle	10	Mass at mammary gland	Mammary mixed tumor and complex mammary carcinoma	>8years	Purebred
370	2018	P6113804	D18-2626	Canine	ครัวซอง	Female	Cocker Spanial	14	Mass at mammary gland	Mammary mixed tumor	>8years	Purebred
371	2018	P6119151	D18-2479	Canine	ลักกี้	Female	Mixed	7	Mass at mammary gland	Anaplastic carcinoma	≤8years	Mixed breed
372	2018	P6118743	D18-2175	Feline	ยูยี่	Female	Persian	10	Mass at mammary gland	Simple carcinoma (tubular type)	>8years	Purebred
373	2018	P6118751	D18-2172	Feline	สามสี	Female	DSH	10	Mass at mammary gland	Solid mammary gland carcinoma	>8years	Mixed breed
374	2018	P5841061	D18-1605	Canine	ปุ๊ก	Female	Poodle	12	Mass at mammary gland	Simple carcinoma (Tubulopapillary type)	>8years	Purebred
375	2018	P61168451	D18-1606	Canine	คุกกี้	Female	Golden Retriever	11	Mass at mammary gland	Simple mammary carcinoma (Tubular type)	>8years	Purebred
376	2018	P6118106	D18-1849	Canine	หมูแดง	Female	Mixed	16	Mass at mammary gland	Complex carcinoma	>8years	Mixed breed
377	2018	P6118289	D18-1929	Canine	หมูแดง	Female	Shitzu	12	Mass at mammary gland	Simple mammary carcinoma (Papillary type)	>8years	Purebred
380	2018	P61118386	D18-1957	Canine	สเปค	Female	Mixed	10	Mass at mammary gland	Anaplastic carcinoma	>8years	Mixed breed
382	2018	P6118774	D18-2104	Canine	เตียนหอม	Female	Shitzu	13	Mass at mammary gland	Mammary mixed tumor	>8years	Purebred
383	2018	P5628625	D18-0747	Canine	ปาร์ตี้	Female	Shitzu	5	Mass at mammary gland	Complex carcinoma	≤8years	Purebred
384	2018	P6114703	D18-0788	Canine	ยูริโกะ	Female	Chihuahua	10	Mass at mammary gland	Complex carcinoma	>8years	Purebred
385	2018	P6119821	D18-0903	Canine	แองเจิ้ล	Female	American Pitbull Terrier	10	Mass at mammary gland	Anaplastic carcinoma	>8years	Purebred
386	2018	P6115534	D18-0953	Canine	สนิม	Female	Mixed	8	Mass at mammary gland	Anaplastic carcinoma	≤8years	Mixed breed
387	2018	P6115673	D18-0987	Canine	บูบู้	Female	Mixed	8	Mass at mammary gland	Mammary mixed tumor	≤8years	Mixed breed
388	2018	P6114699	D18-0989	Canine	เหมย	Female	Mixed	10	Mass at mammary gland	Complex adenoma	>8years	Mixed breed
390	2018	P6121242	D18-3129	Canine	โค้ก	Female	Dachshund	11	Mass at mammary gland	Complex carcinoma	>8years	Purebred
391	2018	P6114669	D18-0789	Canine	เหมย	Female	Mixed	11	Mass at mammary gland	Simple carcinoma (tubular type)	>8years	Mixed breed
393	2018	P6116147	D18-1095	Canine	วันดี	Female	Mixed	7	Mass at mammary gland	Solid carcinoma	≤8years	Mixed breed
394	2018	P6116401	D18-1099	Canine	บุ๋ย	Female	Mixed	13	Mass at mammary gland	Fibroadenoma	>8years	Mixed breed
395	2018	P6416370	D18-1219	Canine	วินดี้	Female	Golden Retriever	9	Mass at mammary gland	Simple mammary adenoma	>8years	Purebred
397	2019	P6225636	D19-1550	Canine	แบมแบม	Female	Beagle	11	Mass at mammary gland	Tubular carcinoma	>8years	Purebred
398	2019	P6227084	D19-2154	Canine	โคโค่	Male	Mixed	1	Mass at mammary gland	Complex adenoma	≤8years	Mixed breed
399	2019	P6007062	D19-0300	Canine	แฮปปี้	Female	Dachshund	11	Mass at mammary gland	Benign mixed tumor	>8years	Purebred
401	2019	P6121574	CHM10	Canine	บุญหลง	Female	Cocker Spanial	10	Mass at mammary gland	Complex adenocarcinoma	>8years	Purebred
402	2019	P5948799	D19-0072	Canine	โทนี่	Female	Miniature	12	Mass at mammary gland	Solid mammary gland carcinoma	>8years	Purebred
403	2019	P6222520	D19-0255	Canine	Beth	Female	Alaskan Malamute	9	Mass at mammary gland	Mammary mixed tumor grade 2	>8years	Purebred
404	2019	P6121632	D19-0416	Feline	ขาวขาว	Female	DSH	10	Mass at mammary gland	Simple mammary carcinoma (Tubular type)	>8years	Mixed breed
405	2019	P6223021	D19-0482	Canine	ซูซาน	Female	Chihuahua	9	Mass at mammary gland	Complex carcinoma	>8years	Purebred
406	2019	P6224188	D19-0904	Canine	พุงพลุ้ย	Female	Shitzu	10	Mass at mammary gland	Solid carcinoma	>8years	Purebred
407	2019	P5305218	D19-1381	Canine	เฉาก๊วย	Female	Mixed	8	Mass at mammary gland	Comedocarcinoma	≤8years	Mixed breed
408	2019	P6225149	D19-1271	Canine	บี	Female	Chihuahua	14	Mass at mammary gland	Simple mammary carcinoma (Cystic papillary type)	>8years	Purebred
409	2019	P6225051	D19-1273	Canine	กุ๊ชชี่	Female	Poodle	12	Mass at mammary gland	Fibroadenoma	>8years	Purebred
410	2019	P6224811	D19-1162	Canine	ปุ๊กกี้	Female	Poodle	10	Mass at mammary gland	Complex adenoma	>8years	Purebred
411	2019	P6226185	D19-1706	Feline	กาฟิลด์	Female	DSH	8	Mass at mammary gland	Cribiform carcinoma	≤8years	Mixed breed
412	2019	P6222705	D19-1142	Canine	ลาเต้	Female	Shitzu	9	Mass at mammary gland	Complex carcinoma	>8years	Purebred
413	2019	P6224843	D19-1163	Canine	คุ้กกี้	Female	Mixed	13	Mass at mammary gland	Complex carcinoma	>8years	Mixed breed
414	2019	P6223527	D19-1686	Feline	ชมพู่	Female	Persian	2	Mass at mammary gland	Comedocarcinoma	≤8years	Purebred
415	2019	P6225619	D19-1495	Canine	กาแฟ	Female	Mixed	10	Mass at mammary gland	Anaplastic carcinoma	>8years	Mixed breed
416	2019	P6226171	CHM333	Canine	สไปรท์	Female	Mixed	3	Mass at mammary gland	Papillary adenocarcinoma	≤8years	Mixed breed
417	2019	P6227241	CHM384	Canine	โปรเจค	Female	Pomeranian	4	Mass at mammary gland	Solid carcinoma	≤8years	Purebred
418	2019	P6225346	CHM285	Feline	โมง	Female	DSH	5	Mass at mammary gland	Simple tubular adenocarcinoma, grade 2	≤8years	Mixed breed
419	2019	P6225211	CHM235	Canine	ส้มโอ	Female	Mixed	5	Mass at mammary gland	Benign mixed mammary tumor	≤8years	Mixed breed
420	2019	P6223410	CHM234	Canine	หมูน้อย	Female	Shitzu	3	Mass at mammary gland	Simple papillary and ductal adenocarcinoma, grade 1	≤8years	Purebred
421	2019	P6225383	CHM268	Canine	สีขาว	Female	Mixed	10	Mass at mammary gland	Anaplastic carcinoma	>8years	Mixed breed
422	2019	P5628666	CHM149	Canine	ข้าวแตน	Female	Mixed	12	Mass at mammary gland	Benign mixed mammary tumor	>8years	Mixed breed
423	2019	P6119547	CHM326	Canine	ขำขำ	Female	Pomeranian	6	Mass at mammary gland	Benign mixed tumor	≤8years	Purebred
424	2019	P6121580	CHM24	Canine	กุ้งกิ้ง	Female	Mixed	11	Mass at mammary gland	Simple tubular adenocarcinoma, grade 1	>8years	Mixed breed
425	2019	P6121595	CHM3	Canine	กีต้า	Female	Siberian Husky	8	Mass at mammary gland	Solid carcinoma, grade 3	≤8years	Purebred
426	2019	P6223591	CHM122	Canine	แบมแบม	Female	Mixed	11	Mass at mammary gland	Simple tubular adenocarcinoma, grade 2	>8years	Mixed breed
427	2019	P6223629	CHM127/1	Canine	พูลทรัพย์1	Female	Mixed	15	Mass at mammary gland	Simple tubular adenocarcinoma, grade 2	>8years	Mixed breed
428	2019	P6224466	CHM176	Canine	ดำ	Female	Mixed	10	Mass at mammary gland	Anaplastic carcinoma	>8years	Mixed breed
429	2019	P6120816	CHM46	Canine	หมูตุ๋น	Female	Shitzu	11	Mass at mammary gland	Simple tubular adenocarcinoma	>8years	Purebred
430	2019	P6227909	CHM12	Canine	มะเขือ	Female	Beagle	10	Mass at mammary gland	Invasive tubular adenocarcinoma, grade 2	>8years	Purebred
431	2019	P6224489	D19-1063	Canine	เฮเลน	Female	Chihuahua	9	Mass at mammary gland	Solid carcinoma	>8years	Purebred
432	2019	P6222712	D19-0352	Canine	บุ้งกี๋	Female	Beagle	11	Mass at mammary gland	Mammary mixed tumor	>8years	Purebred
434	2019	P6223866	D19-0802	Feline	ขาว	Female	DSH	7	Mass at mammary gland	Solid carcinoma	≤8years	Mixed breed
435	2019	P6223702	D19-0726	Canine	สไปรท์	Female	French bulldog	5	Mass at mammary gland	Mammary mixed tumor	≤8years	Purebred
436	2019	P6222930	D19-0547	Feline	เหมียว	Female	DSH	13	Mass at mammary gland	Intraductal papillary adenoma	>8years	Mixed breed
437	2019	P6223071	D19-0655	Feline	แห้ง	Female	DSH	7	Mass at mammary gland	Simple carcinoma (tubular type)	≤8years	Mixed breed
438	2012	P5300750	D12-425	canine	Lily	Female	Poodle	2	skin mass	Atypical lipoma with panniculitis	≤8years	Purebred
439	2012	P5517904	D12-374	canine	หมี	Male	Mixed	2	Mass at right HL	Osteosarcoma	≤8years	Mixed breed
440	2012	P5518001	D12-393	canine	ดู๋	Male	Poodle	11	Mass at the right mandible	Malignant melanoma	>8years	Purebred
441	2012	P5518073	D12-394	canine	Prinzi	Female	Rottweiler	2	Mass in the lateral trunk	Liposarcoma	≤8years	Purebred
442	2012	P5416133	D12-340	canine	ซี่	Female	Poodle	8	Mass at ear canal	Squamous cell carcinoma	≤8years	Purebred
444	2012	P5517099	D12-306	canine	ดิ้ดดี้	Male	Mixed		Mass at penis	Squamous cell carcinoma		Mixed breed
445	2012	P5306058	D12-307	canine	ฮานะ	Female	Golden Retriever	6	Skin mass at metacarpal	Trichoepithelioma	≤8years	Purebred
446	2012	P5517667	D12-284	canine	ดำดี	Male	Mixed	11	Skin mass	Fibrosarcoma	>8years	Purebred
447	2012	P5517491	D12-269	canine	ปุยฝ้าย	Female	Poodle	10	Intestine	Leiomyoma	>8years	Purebred
448	2012	P5517521	D12-270	canine	ปังปอนด์	Male	Shitzu	10	Testis	Seminoma	>8years	Purebred
449	2012	P5410311	D12-232	canine	ดุ๊กดิ๊ก	Female	Poodle	5	Mass at vagina	Fibroma	≤8years	Purebred
450	2012	P5517596	D12-283	canine	กาแฟ	Female	Mixed	7	Skin mass at right lateral trunk	Mast cell tumor grade 2	≤8years	Mixed breed
451	2012	P5517681	D12-285	canine	บุญชู	Male	Basset hound	7	Skin mass at dorsal part of thorax	Infiltrative lipoma	≤8years	Purebred
453	2012	P5300580	D12-231	canine	ปลิว	Female	Mixed	8	Skin mass at dorsal part of thorax	Mast cell tumor grade 2	≤8years	Mixed breed
454	2012	P5516609	D12-198	canine	จีจี้	Female	Poodle	10	Mass at tongue	Lingual squamous cell carcinoma	>8years	Purebred
455	2012	P5517052	D12-182	canine	Lucky	Female	Golden Retriever	5	Mass at right pinna	Trichoblastoma (ribbon type)	≤8years	Purebred
456	2012	P5517225	D12-197	canine	อ้วน	Male	Mixed	12	Skin mass	Mast cell tumor grade 2	>8years	Mixed breed
457	2012	P5517183	D12-200	canine	หมูหยอง	Male	Poodle	6	Skin mass at base of tail	Cystic trichoepithelioma	≤8years	Purebred
458	2012	P5517139	D12-196	canine	สม็อก	Male	Mixed		Mass at skin	Mast cell tumor grade 2		Mixed breed
459	2012	P4416788	D12-119	canine	สไปรท์	Male	Mixed	10	Skin mass at right FL	Squamous cell carcinoma	>8years	Mixed breed
460	2012	P5516438	D12-117	canine	กะปิ๋ว	Male	Miniature		Skin mass at right HL	Mast cell tumor grade 2		Purebred
461	2012	P5516646	D12-100	canine	มุม	Female	Mixed	9	Mass at left FL	Osteosarcoma	>8years	Mixed breed
462	2012	P5516531	D12-101	canine	กาโม่	Male	Mixed	12	Mass at dorsal trunk	Hemangiosarcoma	>8years	Mixed breed
463	2012	P5416324	D12-120	canine	โมเม	Female	Mixed	13	Subcutaneous mass at shoulder1	Squamous cell carcinoma with sebaceous gland hyperplasia	>8years	Mixed breed
465	2012	P5516505	D12-155	canine	เต้าหู้	Male	Mixed	10	Mass at digit	Sweat gland adenocarcinoma	>8years	Mixed breed
466	2012	P5411773	D12-154	canine	ลัคกี้	Male	Shitzu	9	Subcutaneous mass at shoulder	Squamous cell carcinoma (well differentiated)	>8years	Purebred
467	2012	P5304298	D12-048	canine	เท็ดดี้เเบร์	Male	Schnauzer	13	Skin mass at right palmar	Malignant fibrous histiocytoma(Anaplastic sarcoma with giant cells)	>8years	Purebred
468	2012	P5305741	55 B 081	canine	เทอร์โบ	Male	Mixed	11	Lower lip	Malignant melanoma	>8years	Mixed breed
469	2012	P5416251	D12-015	canine	เฉินหลง	Male	Mixed	15	Mass at left FL	Mast cell tumor grade 2	>8years	Mixed breed
470	2012	P5411708	D12-885	canine	น้ำตาล	Female	Mixed		Mass at base of ear	Sebaceous carcinoma		Mixed breed
471	2012	P5519849	D12-887	canine	Teddy	Female	Poodle	9	Mass at perianal area	Lipoma	>8years	Purebred
472	2012	P5519622	D12-777	canine	บราวนี่	Male	Poodle	17	Mass at upper lip	Hepatoid gland carcinoma	>8years	Purebred
473	2012	P5519640	D12-811	canine	เเต้ม	Female	Mixed	8	Skin mass at axillary area	Mast cell tumor grade 2	≤8years	Mixed breed
474	2012	P5519601	D12-810	canine	บ๊อบบี้	Male	Golden Retriever		Mass at urinary bladder	Hemangiosarcoma		Purebred
476	2012	P5519461	D12-746	canine	จิ๊กโก๋	Male	Cocker Spanial	10	Mass at liver	Liposarcoma	>8years	Purebred
477	2012	P5519030	D12-702	canine	จิ๋ว	Female	Poodle	8	Oral mass	Malignant melanoma	≤8years	Purebred
478	2012	P519030	D12-701	canine	จิ๋ว	Female	Poodle	8	Skin mass	Fibrosarcoma	≤8years	Purebred
479	2012	P5414306	D12-700	canine	จัมโบ้	Female	Golden Retriever	7	Skin mass	Trichoepithelioma (cystic)	≤8years	Purebred
480	2012	P5414561	D12-717	canine	จิก	Female	Rottweiler	10	Skin mass	Malignant melanoma	>8years	Purebred
481	2012	P5519183	D12-695	canine	เจ๋อ	Female	Mixed	8	Skin mass	Squamous cell carcinoma	≤8years	Mixed breed
482	2012	P5300313	D12-666	canine	ลูกเต๋า	Male	Mixed	15	Mass at ventral part of tail	Perianal gland carcinoma	>8years	Mixed breed
483	2012	P5519163	D12-665	canine	กุ๊กไก่	Male	Miniature	7	Mass at dorsal part of tail	Perianal gland epithelioma	≤8years	Purebred
484	2012	P5517197	D12-639	canine	พริตตี้	Female	Poodle	9	Vaginal mass	Fibroma (Molle)	>8years	Purebred
485	2012	P5518700	D12-548	canine	หลง	Male	Labrador Retriever	6	Mass at left inguinal	Liposarcoma	≤8years	Purebred
486	2012	P5302642	D12-550	canine	เดียร์	Female	Poodle	11	Skin mass	Sebaceous adenoma	>8years	Purebred
488	2012	P5518555	D12-507	canine	ตัวเล็ก	Female	Shitzu	8	Mass at lower eyelid	Meibomian adenoma	≤8years	Purebred
489	2012	P5518787	D12-640	canine	Sunny	Female	Labrador Retriever	15	Mass at ear canal and skin	Sebaceous epithelioma	>8years	Purebred
490	2012	P5414818	D12-651	canine	ตัวใหม่	Male	Mixed	6	Mass at trunk and abdomen	Mast cell tumor grade 2	≤8years	Mixed breed
491	2012	P5517463	D12-604	canine	ซูโม	Male	Bangkaew	7	Testis	Seminoma	≤8years	Purebred
492	2012	P5518997	D12-611	canine	จูน	Female	Boxer	10	Skin mass	Fibroma	>8years	Purebred
493	2012	P5518973	D12-603	canine	นินจา	Female	Mixed	7	Skin mass	Lipoma	≤8years	Mixed breed
494	2012	P5408867	D12-595	canine	เเคบหมู	Male	Siberian Husky	6	Mass at frontal area of skull	Basal cell tumor	≤8years	Purebred
496	2012	P5518303	D12-540	canine	โฮม	Male	Poodle	10	Mass at right axilla	Liposarcoma was highly suspected	>8years	Purebred
497	2012	P5518534	D12-505	canine	ชายกลาง	Male	Mixed	7	Skin mass	Hemangiomas	≤8years	Mixed breed
499	2012	P5518468	D12-483	canine	ครีม	Female	Mixed	9	Mass at foot pad of right HL	Schwannoma	>8years	Mixed breed
500	2012	P5518195	D12-444	canine	เจนนี่	Female	Mixed	12	Subcutaneous mass at inguinal area	Infiltrative lipoma	>8years	Mixed breed
501	2012	P5522602	D12-1616	feline	นุ้ย	Female	DSH	11	Skin mass at right axillary	Fibrosarcoma	>8years	Mixed breed
502	2012	P5522681	D12-1617	canine	จูเนียร์	Male	Pomeranian	6	Testis	Sertoli cell tumor	≤8years	Purebred
503	2012	P5522587	D12-1615	canine	ดอก	Male	Mixed	4	Testis	Sertoli cell tumor	≤8years	Mixed breed
504	2012	P5522674	D12-1632	canine	เก็กฮวย		Labrador Retriever		Skin mass	Mast cell tumor grade 2		Purebred
505	2012	P5517861	D12-1595	canine	หมูหยอง	Female	Shitzu		Skin mass	Squamous cell carcinoma		Purebred
508	2012	P5522515	D12-1594	canine	หมูปิ้ง	Female	Poodle		Mass at right baccal area	Malignant melanoma		Purebred
509	2012	P5522448	D12-1598	canine	น้องโคล่า	Male	Mixed		Skin mass	Fibrosarcoma		Mixed breed
510	2012	P5522336	D12-1548	feline	เด็กชายหมี	Male	DSH		Mass at buccal area	Amelanotic melanoma		Mixed breed
511	2012	P5522357	D12-1547	canine	ข้าวตอก	Male	Mixed		Skin mass at neck	Squamous cell carcinoma		Purebred
512	2012	P5519498	D12-1367	canine	ไข่ป่าม	Female	Mixed	10	Skin mass at left thorax	Mast cell tumor grade 2	>8years	Mixed breed
513	2012	P5521583	D12-1373	canine	ยักษ์	Male	American Pitbull Terrier	10	Skin mass at ventral part of thorax	Mast cell tumor grade 2	>8years	Purebred
514	2012	P5303038	D12-1437	canine	เจเจ	Female	Pomeranian	10	Mass at vulva	Schwannoma	>8years	Purebred
515	2012	P5411525	D12-1368	canine	ส้มฉุน	Male	English cocker	7	Mass at ear pinna	Basosquamous cell carcinoma	≤8years	Purebred
516	2012	P5521930	D12-1439	canine	ฟางข้าว	Male	Golden Retriever	9	Mass at right FL	Osteosarcoma	>8years	Purebred
517	2012	P5522089	D12-1505	canine	น้องกาเเฟ	Female	Mixed	8	Skin mass	Mast cell tumor grade 2	≤8years	Mixed breed
519	2012	P5415873	D12-1435	canine	Lily	Male	Mixed	11 months	Skin mass at left thoracic area	Mast cell tumor grade 2	≤8years	Mixed breed
520	2012	P5521070	D12-1475	canine	แมงลัก	Female	Mixed	7	Mass at the right lumbar area	Malignant schwannoma	≤8years	Mixed breed
521	2012	P5522036	D12-1442	canine	ดอนล่า	Female	Poodle	9	Mass at ventral of abdomen	Osteosarcoma	>8years	Purebred
522	2012	P5520416	D12-1372	canine	โกโก้	Male	Cocker Spanial	8	Mass at dorsal wall of anus	Mucinous adrenocarcinoma	≤8years	Purebred
523	2012	P5521555	D12-1369	canine	ก๊อต	Male	Mixed	13	Mass at dorsal part of anus	Hepatoid gland adenoma	>8years	Mixed breed
525	2012	P5521216	D12-1227	canine	โทนี่	Female	Cocker Spanial	9	Mass at vulva	Fibroma	>8years	Purebred
526	2012	P5521106	D12-1202	canine	มูมู่	Female	Poodle	12	Skin mass at vulva	Mast cell tumor grade 2	>8years	Purebred
527	2012	P5521664	D12-1328	canine	ข้าวโพด	Male	Mixed	13	Mass at digit	Fibrosarcoma	>8years	Mixed breed
528	2012	P5521525	D12-1307	canine	จู๋จี๋	Female	Mixed	10	Skin mass at trunk	Tubulopapillary carcinoma	>8years	Purebred
529	2012	P5521373	D12-1266	canine	ตาล	Male	Golden Retriever	10	Skin mass at neck	Fibrosarcoma	>8years	Purebred
530	2012	P5521421	D12-1267	canine	Tong	Female	Mixed	15	Skin mass at abdominal area	Hemangiosarcoma	>8years	Mixed breed
531	2012	P5303854	D12-1228	canine	ลักกี้	Female	Shitzu	8	Skin mass at ventral thorax	Mast cell tumor grade 2	≤8years	Purebred
532	2012	P5521043	D12-1200	canine	ตุ๊ต๊ะ	Male	Shitzu	6	Mass at right upper eyelid	Meibomian epithelioma	≤8years	Purebred
533	2012	P5520159	D12-1155	canine	หมิว	Female	Poodle	9	Mass at gum	Squamous cell carcinoma	>8years	Purebred
534	2012	P5521062	D12-1163	canine	บางกอก	Male	Bangkaew	7	Skin mass at neck	Plasmacytoma	≤8years	Purebred
535	2012	P5520335	D12-1083	canine	หลง	Female	Mixed	9	Valva mass	Fibroma (durum)	>8years	Mixed breed
536	2012	P5521498	D12-1291	canine	นำโชค	Male	Chow Chow	12	Mass at the ear	Osteosarcoma	>8years	Purebred
537	2012	P5520375	D12-986	canine	ไดโกโร่	Male	German Shepherd	9	Mass at metacarpal area	Osteosarcoma was suggestion	>8years	Purebred
538	2012	P5520731	D12-1075	canine	หมิ่มหมิ่ม	Female	Mixed	10	Mass at dorsal trunk	Hemangiomas	>8years	Mixed breed
539	2012	P5303916	55 B 1819	canine	ข้าวปั้น	Male	Shitzu	3	Nasal mass	Fibrosarcoma		Purebred
540	2012	P5520759	D12-1084	canine	ชินจัง	Male	Shitzu	7	Skin mass at the gum	Papilloma	≤8years	Purebred
541	2012	P5520775	D12-1096	canine	แก้ว	Male	Golden Retriever	8	Mass at ventral trunk	Fibrosarcoma	≤8years	Purebred
542	2012	P5520834	D12-1116	canine	ฮ่องเต้	Male	Golden Retriever	6	Mass at left lateral neck and ventral trunk	Hemangiomas	≤8years	Purebred
543	2012	P5520859	55 B 1898	canine	ลีโอ		Mixed		Oral mass	Acanthomatous epulis		Mixed breed
544	2012	P5520145	55 B 1861	canine	ไทเกอร์	Male	Mixed	8	Skin mass	Cutaneous histiocytoma		Mixed breed
547	2012	P5520267	D12-975	canine	Sasha	Female	Shitzu	6	Skin mass	Basal cell tumor	≤8years	Purebred
548	2012	P5520001	D12-976	canine	มดตะนอย	Male	Mixed	7	Skin mass	Squamous cell carcinoma	≤8years	Mixed breed
549	2012	P5520446	D12-988	feline	พลอย	Female	DSH	18	Skin mass at axillary and inguinal	Simple carcinoma	>8years	Mixed breed
550	2012	P5518734	D12-977	canine	พลอย	Female	Mixed	17	Skin mass at perianal area	Perianal gland epithelioma	>8years	Mixed breed
551	2012	P5306630	D12-923	canine	โอลีฟ	Female	Poodle	11	Uterine body	Leiomyoma	>8years	Purebred
553	2012	P5520094	D12-922	canine	ขนุน	Male	Bangkaew	3	Skin mass at ventral thorax	Mast cell tumor grade 2	≤8years	Purebred
554	2012	P5300753	D12-902	canine	เมล่อน	Male	Golden Retriever	7	Mass at upper eyelid	Meibomian epithelioma	≤8years	Purebred
555	2012	P5516972	D12-893	canine	อู๋ไฉ้		Mixed		Mass at middle of tongue	Plasmacytoma with squamous cell metaplasia		Mixed breed
556	2012	P5519768	D12-886	canine	โมโม่		English cocker		Skin mass	Sebaceous gland adenoma		Purebred
557	2012	P5519305	D12-904	canine	มารวย	Male	Mixed	12	Mass at testis	Malignant interstitial cell tumor	>8years	Mixed breed
558	2012	P5516701	D12-921	canine	ทาโร่	Male	Golden Retriever	12	Mass at neck	Sebaceous epithelioma	>8years	Purebred
559	2013	P5624636	D13-663	canine	แว่นแก้ว	female	Bangkaew	12	skin mass at trunk	Mast cell tumor was suspected	>8years	Purebred
560	2013	P5628252	D13-1522	canine	เบิร์ดเดย์	female	Golden Retriever	9	mass at right perineal area	Basal cell carcinoma	>8years	Purebred
561	2013	P5628616	D13-1500	canine	บัดดี้	male	Cocker Spanial	7	mass at Lf. HL	Complex(Mixed) Aprocrine adenocarcinoma	≤8years	Purebred
562	2013	P5300408	D13-1666	canine	กังฟู	male	Poodle	4	Basal cell tumor	Basal cell tumor	≤8years	Purebred
563	2013	P5628669	D13-1664	canine	สแตมป์	male	Poodle	12	Perianal gland carcinoma	Perianal gland carcinoma	>8years	Purebred
564	2013	p5625664	D13-1693	canine	ลั่นทม	female	Dalmatian	15	Mass at the right HL (Inguinal area)	Squamous cell carcinoma	>8years	Purebred
565	2013	P5623669	D13-1379	canine	ลิลลี่	female	Golden Retriever	7	skin mass	Hemangiomas	≤8years	Purebred
566	2013	P5628942	D13-1757	canine	บุญยืน	female	Poodle		skin mass at the left metatarsal area	Hemangioma		Purebred
568	2013	P5300958	D13-1769	canine	ซูชิ	male	shitzu	7	kidney	Renal carcinoma was highly suspected	≤8years	Purebred
569	2013	P5628902	D13-1716	canine	ขนุน	male	Mixed	10	mass at ventral area of neck	Squamous cell carcinoma	>8years	Mixed breed
570	2013	P5412692	D13-1739	canine	มดเเดง	female	Poodle	11	skin mass	Mast cell tumors grade 2	>8years	Purebred
572	2013	P5623475	D13-129	feline	Lucky	male	DSH	10	skin mass at neck	Fibrosarcoma	>8years	Mixed breed
573	2013	P5623800	D13-225	canine	โคล่า	male	mixed	2	skin mass at metacarpal area	Fibroma	≤8years	Mixed breed
574	2013	P5623675	D13-191	canine	แพนด้า	female	Labrador Retriever	9	mass at soft palate	Malignant melanoma	>8years	Purebred
575	2013	P5623709	D13-186	canine	ชีโน่	female	mixed	5	skin mass at dorsal trunk	Benign peripheral nerve sheath tumor	≤8years	Mixed breed
576	2013	P5522984	56 B 387	canine	โจโจ้	female	Spitz	6	skin mass at trunk	Squamous papilloma, skin mass	≤8years	Purebred
577	2013	P5522367	D13-119	canine	จูดี้	female	mixed	8	mass in the left of perianal area	Hepatoid gland carcinoma	≤8years	Mixed breed
579	2013	P5624111	D13-280	canine	อุ๋งอิ๋ง	female	shitzu	8	mass at vagina	Leiomyoma	≤8years	Purebred
580	2013	P5303355	D13-279	canine	แฟนต้า	female	Saint Bernard	10	skin mass at ventral abdomen	Fibrosarcoma	>8years	Purebred
582	2013	P5623277	D13-192	canine	เฉาก๊วย	male	Mixed	5	skin mass	collagenous hamatoma	≤8years	Mixed breed
583	2013	P5624109	D13-281	canine	เเชมป์	female	pug	8	skin mass at ventral abdomen	Mast cell tumor grade 2	≤8years	Purebred
586	2013	P5623460	D13-361	feline	คิงคอง	male	persian	7	mass at urethra	Adenocarcinoma	≤8years	Purebred
587	2013	P5300390	D13-294	canine	มะหมี่	female	Cocker Spanial	13	mass at ventral	Liposarcoma	>8years	Purebred
588	2013	P5304511	D13-269	canine	มาม่า	male	Poodle	8	skin mass at inguinal area	Squamous cell carcinoma	≤8years	Purebred
589	2013	P5411938	D13-270	canine	ซันนี่	female	Rottweiler	9	mass at second digit	Fibroplastic osteosarcoma	>8years	Purebred
590	2013	P5627839	D13-1397	canine	ฺBusy	female	shitzu	14	mass at ear pinna	Aprocrine adrenocarcinoma	>8years	Purebred
592	2013	P5627279	D13-1247	canine	สไปร์	female	Mixed	16	mass at head	Aprocrine adrenocarcinoma	>8years	Mixed breed
593	2013	P5626266	D13-1294	canine	คาร์เดีย	male	Mixed	14	mass at face	Squamous cell carcinoma	>8years	Mixed breed
594	2013	P5627736	D13-1390	canine	KY	male	Mixed	5	skin mass	Mast cell tumor grade 2	≤8years	Mixed breed
595	2013	P5628260	D13-1526	canine	มีมี่	female	Labrador Retriever	10	skin mass	Fibroma with angiomatosis	>8years	Purebred
596	2013	P5627826	D13-1301	canine	ฟรอนเทียร์	female	Rottweiler	12	mass at digit	malignant malenoma	>8years	Purebred
597	2013	P5301500	D13-1419	canine	ฟีโน่	female	Mixed	8	sternal cutaneous mass	Atypical lipoma with panniculitis	≤8years	Mixed breed
598	2013	P5302249	D13-1439	canine	โฮเล็ต	male	Mixed	6	testicular mass	Sertoli cell tumor	≤8years	Mixed breed
599	2013	P5627574	D13-1355	canine	น้องเจ้าขา	female	shitzu	14	skin mass	Infiltrative lipoma	>8years	Purebred
600	2013	P5302056	D3-1485	canine	นิล	female	Mixed	4	Bone	Histiocytic sarcoma was highly suspected	≤8years	Mixed breed
601	2013	P5628212	D13-1524	canine	ฮอนด้า	male	Bangkaew	8	spleen	Undifferentiated metastatic carcinoma	≤8years	Purebred
602	2013	P5625452	56 B 1267	canine	จิ๊บซี่		Mixed		subcutaneous mass	Lipoma		Mixed breed
603	2013	P5625306	D13-630	canine	Sketch	male	Mixed	7	skin mass	Benign peripheral nerve sheath tumor	≤8years	Mixed breed
604	2013	P5625314	56 B 1264	canine	CD		Mixed		urinary bladder mass	Transitional cell carcinoma		Mixed breed
605	2013	P5302155	D13-649	canine	พลอย	female	shitzu	9	mass at fourth phalanges	Sebaceous gland epithelioma	>8years	Purebred
607	2013	P5306086	D13-600	canine	ไทเกอร์	male	Mixed	14	skin mass	Sebaceous gland epithelioma	>8years	Mixed breed
608	2013	P5625185	D13-632	canine	เอ็ม	male	Golden Retriever	4	skin mass at right mandible area	Trichoblastoma (Ribbon type)	≤8years	Purebred
609	2013	P5415005	D13-712	canine	บูบู้	male	shitzu	5	skin mass at head	Basal cell tumor	≤8years	Purebred
610	2013	P5625482	D13-733	canine	ทาโร่	male	Mixed	6	oral mass	Highly anaplastic tumor ( angiosarcoma )	≤8years	Mixed breed
612	2013	P5623214	D13-038	feline	หลง	female	DSH	10	skin mass	Adenocarcinoma	>8years	Mixed breed
613	2013	P5623100	D13-025	canine	โคล่า	male	Poodle	15	Testis	Seminoma with orchitis	>8years	Purebred
615	2013	P5302491	D13-003	canine	บุญรอด	female	Thai Ridgeback	9	skin mass	Canine hemangiopericytoma	>8years	Purebred
618	2013	P5306934	D13-075	canine	มุ่งมั่น	male	Mixed	7	skin mass	Fibrosarcoma	≤8years	Mixed breed
620	2013	P5623159	D13-027	canine	ลินลี่	female	Mixed	12	skin mass	Sebaceous gland adenoma	>8years	Mixed breed
622	2013	P5414219	D13-116	canine	ลาล่า	female	Labrador Retriever	10	skin mass	Anaplastic carcinoma	>8years	Purebred
623	2013	P5623267	D13-053	canine	มะขาม	female	Mixed	9	mass at lower eyelid	melanoma	>8years	Mixed breed
624	2013	P5623299	D13-073	canine	เเหวน	female	Mixed		mass at left ear canal	Squamous cell carcinoma		Mixed breed
625	2013	P5623137	D13-089	canine	โอท็อป	male	Mixed	8	skin mass	Lipoma	≤8years	Mixed breed
626	2013	P5520092	D13-118	canine	น้องเพชร	male	Golden Retriever	10	mass at digit	Plasmacytoma	>8years	Purebred
627	2013	P5623229	D13-090	canine	ลูกตาล	female	Mixed	14	mass around urethra	Sarcomatoid mesothelioma	>8years	Mixed breed
628	2013	P5623417	D13-092	canine	น้องเยี่ยม	female	Mixed	13	skin mass	Mast cell tumor grade 2	>8years	Mixed breed
629	2013	P5626462	D13-994	feline	น้อง	female	DSH	5	mass at right shoulder	fibrosarcoma	≤8years	Mixed breed
630	2013	P5304483	D13-877	canine	พลอย	female	Poodle	12	mass at liver	Hemangiosarcomas	>8years	Purebred
631	2013	P5626213	D13-919	canine	จิ๊กกี้	female	Mixed	12	skin mass	Sebaceous carcinoma	>8years	Mixed breed
632	2013	P5624376	D13-878	canine	ออโต้	male	Mixed	9	Bone	Osteosarcoma	>8years	Mixed breed
634	2013	P5519911	D13-1068	canine	วอลโว่	female	Bull dog	10	mass	fibrosarcoma	>8years	Purebred
635	2013	P5626539	D13-1029	canine	ฮิปปี้	male	Mixed	13	mass at spleen	Hemangiosarcomas	>8years	Mixed breed
637	2013	P5626336	D13-960	canine	Benji	male	Mixed	10	mass at right FL	Osteosarcoma	>8years	Mixed breed
639	2013	P5626610	D13-1053	canine	มูมู่	female	Bangkaew	6	skin mass	mast cell tumor grade 3	≤8years	Purebred
640	2013	P5301104	D13-1086	canine	แคบหมู	female	Golden Retriever		mass at head	Basal cell tumor		Purebred
641	2013	P5626633	D13-1052	canine	โตโต	male	Golden Retriever		mass at ear	Ceruminous cystadenoma		Purebred
643	2013	P5520681	D13-1036	canine	Sydney	female	Mixed		skin mass	mast cell tumor grade 1		Mixed breed
644	2013	P5626183	D13-959	canine	บราวนี่	female	Poodle	13	axillary lymph node	carcinoma metastasis	>8years	Purebred
645	2013	P5626468	D13-995	canine	ตัวเล็ก	female	Mixed	11	skin mass at left HL	fibrosarcoma	>8years	Mixed breed
646	2013	P5626154	D13-920	canine	มูมู่	female	Mixed	9	skin mass	mast cell tumor grade 3	>8years	Mixed breed
647	2013	P5626297	D13-939	canine	โคโค่	female	Bull terrier	6	mass at gum	Osteosarcoma	≤8years	Purebred
648	2013	P5625693	D13-1121	canine	ข้าวเหนียว	female	Mixed	7	mass at left ear pinna	Plasma cell tumor	≤8years	Mixed breed
650	2013	P5624244	D13-359	canine	สมปอง	female	Bull dog	6	skin mass	Mast cell tumor grade 2	≤8years	Purebred
651	2013	P5624160	D13-360	canine	ของชอบ	male	German Shepherd	7	oral mass	fibrosarcoma	≤8years	Purebred
652	2013	P5626526	D13-1028	canine	ถุงทอง	male	Mixed	9	mass at perianal area	Perianal gland epitheliona	>8years	Mixed breed
653	2013	P5623350	D13-363	canine	จูน	female	Mixed	14	skin mass	Mast cell tumor grade 2	>8years	Mixed breed
654	2013	P5624290	D13-362	canine	เบ็นจี้	male	Mixed	14	Mass at the perinal area	​Hepatoid gland carcinoma	>8years	Mixed breed
655	2013	P5624461	D13-431	canine	สีนวล	female	Mixed	13	mass in the urinary bladder	Transitional cell carcinoma	>8years	Mixed breed
656	2013	P5624333	D13-320	canine	น้องหมอก	male	Mixed		skin mass	Squamous cell carcinoma		Mixed breed
657	2013	P5624214	D13-388	canine	โต	male	Golden Retriever	7	skin mass	Fibrosarcoma	≤8years	Purebred
658	2013	P5624486	D13-386	canine	เล็กน้อย	female	Poodle	6	skin mass	Sebaceous gland adenoma	≤8years	Purebred
659	2013	P5624436	D13-394	canine	เเฟนซี	female	German Shepherd	1	skin mass at mandible area	Fibrosarcoma	≤8years	Purebred
660	2013	P5624106	D13-319	canine	ทึ่ม	Male	Mixed	10	mass at anus	Adenocarcinoma	>8years	Mixed breed
661	2013	P5623958	D13-262	canine		female	Poodle	7	mass at left perineal area	Schwannoma	≤8years	Purebred
662	2013	P5624621	D13-454	canine	ปิ๊ดปี๋	female	Mixed	8	skin mass	Cutaneous histiocytoma	≤8years	Mixed breed
664	2013	P5300434	D13-473	canine	กาแฟ	male	Poodle	8	mass at perianal area	Hepatoid gland carcinoma	≤8years	Purebred
665	2013	P5624366	D13-414	canine	ทูเช่	male	Mixed	9	mass at perianal area	Hepatoid gland carcinoma	>8years	Mixed breed
666	2013	P5624864	D13-575	canine	อิ๊กคิว	male	Mixed	13	mass at digit	Fibrosarcoma	>8years	Purebred
667	2013	P5624648	D13-534	canine	นำลาภ	male	Mixed	10	skin mass	Mast cell tumor grade 2	>8years	Mixed breed
668	2013	P5624808	D13-511	canine	เเปปซี่	female	Mixed	5	skin mass	Mast cell tumor grade 2	≤8years	Purebred
669	2013	P5306685	D13-453	canine	คุกกี้	female	Cocker Spanial	9	mass at lower eyelid	Meibomian epithelioma	>8years	Purebred
670	2013	P5624602	D13-551	canine	White	male	Mixed	10	skin mass	Hemangiosarcomas	>8years	Mixed breed
672	2013	P5625076	D13-599	canine	โอเด็ต	female	Cocker Spanial	5	mass in abdominal cavity	Mesothelioma	≤8years	Purebred
673	2013	P5624510	D13-413	canine	ขี้ฝุ่น	male	Labrador Retriever	3	subcutaneous mass	Lipoma	≤8years	Purebred
674	2013	P5517860	D13-415	canine	ทุเรียน	male	Beagle	1	mass	papilloma	≤8years	Purebred
675	2013	P5522880	D13-430	canine	จอซ	male	Mixed	13	nasal mass	Fibrosarcoma was suspected	>8years	Mixed breed
676	2013	P5624665	D13-455	canine	กิ๊ก	male	Mixed	12	mass at prepuce	Sabaceous gland adenoma	>8years	Mixed breed
677	2013	P5416256	D13-1356	canine	เชรี่	female	Golden Retriever	11	nasal mass	Adenocarcinoma	>8years	Purebred
678	2013	P5300342	D13-1173	canine	ลำดวน	female	Cocker Spanial	5	mass at buccal cavity	fibrosarcoma	≤8years	Purebred
679	2013	P5522937	D13-1587	canine	โจอี้	male	Poodle	10	mass at foot pad	Liposarcoma	>8years	Purebred
680	2013	P5625607	D13-1444	canine	วิกกี้	female	Rottweiler	4	Bone	Osteosarcoma was highly suspected	≤8years	Purebred
681	2013	P5627453	D13-1523	canine	โมจิ	female	Rottweiler	9	mass at left HL	Squamous cell carcinoma	>8years	Purebred
682	2013	P5627825	D13-1458	canine	เจโร	female	shitzu	10	mass at left shoulder	Fibroma	>8years	Purebred
683	2013	P5625797	D13-831	canine	กวาง	female	Mixed	11	skin mass	Mast cell tumor grade 2	>8years	Mixed breed
684	2013	P5625527	D13-710	canine	ยิปซี	male	pug	4	skin mass	Infiltrative lipoma	≤8years	Purebred
685	2013	P5625535	D13-711	canine	เปียกปูน	male	Poodle	14	mass at lip	Trichoblastoma	>8years	Purebred
686	2013	P5625944	D13-844	canine	รวงข้าว	female	Golden Retriever	8	mass at mandible	Pseudocarcinoma hyperplasia	≤8years	Purebred
687	2013	P5625726	D13-772	canine	จุ่น	female	Mixed	9	mass at vagina	Fibroleiomyoma	>8years	Mixed breed
688	2013	P5625808	D13-815	canine	หมี	male	Mixed	10	mass at ear pinna	Basal cell tumor	>8years	Mixed breed
689	2013	P5302415	D13-816	canine	ซอมภอ	female	Labrador Retriever	6	mass at nipple	Sebaceous carcinoma	≤8years	Purebred
691	2013	P5625984	D13-851	canine	ศรีนวล	female	Mixed	5	skin mass	Apocrine ductular carcinoma	≤8years	Mixed breed
692	2013	P5300221	D13-858	canine	ปุยนุ่น	male	Poodle	12	skin mass	sebaceous epithelioma	>8years	Purebred
693	2013	P5625913	D13-859	canine	ดุ๊กดิ๊ก	male	Mixed	11 mo	Bone	Osteochondroma was highly suspeected	≤8years	Mixed breed
694	2013	P5625777	D13-782	canine	กลอเรีย	female	Golden Retriever	9	mass at lumbar	Basosquamous cell carcinoma	>8years	Purebred
698	2013	P5626152	D13-921	canine	ดุ๊กดิ๊ก	female	Golden Retriever	7	skin mass at HL	Mast cell tumor grade 2	≤8years	Purebred
700	2013	P5627057	D13-1157	canine	ขี้ต่าว	female	Mixed	9	skin mass	mast cell tumor grade 1	>8years	Mixed breed
701	2013	P5415230	D13-1051	canine	มาม่า	Male	Mixed	13	mass at perianal area	complex(mixed) aprocrine adenocarcinoma	>8years	Mixed breed
702	2013	P5626838	D13-111	canine	กีวี่	female	Mixed	7	skin mass at thoracic area	Osteosarcoma	≤8years	Mixed breed
703	2013	P5626965	D13-1174	canine	อดัม	female	Mixed	14	mass at the right lateral body	Myxoid Liposarcoma	>8years	Mixed breed
704	2013	P5627193	D13-1201	canine	มาร์กี้	female	Labrador Retriever	1	mass at the left lateral abdomen	Liposarcoma	≤8years	Purebred
706	2013	P5627098	D13-1310	canine	โมโม่	Male	Mixed	8	mass at perianal area	Perianal gland epitheliona	≤8years	Mixed breed
707	2013	P5627029	D13-1248	canine	มอลลี่	female	Saint Bernard	5	skin mass	Infiltrative lipoma	≤8years	Purebred
708	2013	P5520381	D13-1143	canine	ชายกลาง	Male	Mixed	11	mass at the left mandible	ฺBasal cell tumor	>8years	Mixed breed
709	2013	P5617598	D13-1328	canine	คิว	Male	Thai Ridgeback		mass at submandibular area	mast cell tumor grade 3		Purebred
710	2013	p6622937	D13-1293	canine	โจอี้	Male	Poodle	10	mass at digit	Liposarcoma	>8years	Purebred
712	2013	P5305933	D13-1296	canine	บูบู	Male	Mixed	12	mass at perianal area	Perianal gland carcinoma	>8years	Mixed breed
714	2013	P5627313	D13-1292	canine	ทาโร่	Male	Chihuahua	10	mass at perianal area	Perianal gland carcinoma	>8years	Purebred
716	2013	P5626212	56 B 2767	canine	รถโฟร์ค		Mixed			adenocarcinoma with lymph node metastasis		Mixed breed
717	2013	P5627870	D13-1557	canine	ไมโล	Male	Yorkshire Terrier	9	skin mass	Mast cell tumor grade 2	>8years	Purebred
718	2013	P5628111	D13-1605	canine	น้ำผึ้ง	female	Cocker Spanial	11	skin mass	Hemangioma	>8years	Purebred
719	2013	P5625200	D13-1556	canine	ปุ๊กกี้	female	Golden Retriever	8	spleen	Hemangiopericytoma	≤8years	Purebred
720	2013	P5625954	D13-1473	canine	รุงรัง	male	Mixed	5	mass 1	Melanocytoma-acanthoma	≤8years	Mixed breed
722	2013	P5628132	56 B 2787	canine	เเหม่ม	female	Golden Retriever	5	skin mass	Mast cell tumor , low grade	≤8years	Purebred
724	2013	P5626959	56 B 2645	canine	Casper		Mixed		skin mass	Simple tubular adenocarcinoma, originated from aprocrine gland		Mixed breed
726	2013	P5625437	D13-708	canine	เสือ	male	Mixed	8	skin mass	Mast cell tumor grade 2	≤8years	Mixed breed
727	2013	P5625581	D13-725	canine	นุ่น	female	Mixed	9	mass at left inguinal area	Squamous cell carcinoma	>8years	Mixed breed
728	2013	P5300735	D13-1681	canine	candy	female	German Shepherd	8	skin mass	Basal cell carcinoma	≤8years	Purebred
729	2013	P5627904	D12-1599	canine	เต้าฮวย	male	Golden Retriever	4 mo	mass at madibular bone	Osteosarcoma	≤8years	Purebred
730	2013	P5625229	D13-1226	canine	คุ้กกี้	female	Golden Retriever	6	mass at lower lip	melanoma	≤8years	Purebred
731	2014	P5729353	D14-061	canine	โคล่า	Male	Poodle	11	Gingival mass	Mast cell tumor grade 1 was highly suspect with chronic inflmammation	>8years	Purebred
732	2014	P5629108	D14-008	canine	โบอิ้ง	Male	Pomeranian	13	Mass at left FL	Aprocrine adenoma	>8years	Purebred
733	2014	P5629107	D14-200	canine	มีมี่	Female	Poodle	8	Skin mass (inguinal area)	Lipoma	≤8years	Purebred
738	2014	P5301890	D14-263	canine	ไมโล	Male	Mixed	10	skin mass (axillary area)	Lipoma	>8years	Purebred
739	2014	P5730085	D14-303	canine	ซูโม่	Male	Bull dog	7	Mass at tail	Perianal gland adenoma	≤8years	Purebred
740	2014	P5730124	D14-292	canine	โม่	Male	Shitzu	7	Mass at perianal area	Perianal gland epithelioma	≤8years	Purebred
741	2014	P5729757	D14-202	canine	ซาไก	Male	Mixed	9	skin mass (ear pinna)	Squamous cell carcinoma	>8years	Mixed breed
742	2014	P5729403	D14-286	canine	หมี	Male	Mixed	2	nasal mass	Atypical TVT was highly suspected	≤8years	Mixed breed
744	2014	P5626896	D14-393	canine	บอม	Male	Shitzu	7	Mass at right conjunctiva	Squamous papilloma with pseudocarcinomatous epithelial hyperplasia	≤8years	Purebred
746	2014	P5414961	D14-354	canine	ฟูฟู	Male	Samoyed	10	Mass at right lower eyelid	Meibomian adenoma	>8years	Purebred
747	2014	P5414926	D14-049	canine	ฟ้าใส	Female	Shitzu	2	Umbilical mass	Lipoma	≤8years	Purebred
748	2014	P5729308	D14-040	canine	จิ้นเจอร์	Female	Mixed	8	Skin mass (Frontal skull)	Multilobular tumor of bone	≤8years	Mixed breed
749	2014	P5731021	D14-570	canine	ร็อคกี้	Male	Labrador Retriever	13	Mass at left HL	Osteosarcoma(giant cell type)	>8years	Purebred
750	2014	P5730540	D14-413	canine	ติ๊ดตี่	Female	Mixed	14	Skin mass (Right scapular)	Follicular harmatoma with mild degree of dermatitis	>8years	Mixed breed
751	2014	P5730171	D14-340	canine	นีน่า	Female	Golden Retriever	12	Skin mass (right 4th digit)	Mast cell tumor grade 2	>8years	Purebred
752	2014	P5729650	D14-160	canine	จิ๊กโก๋	Male	Mixed		Bone	Osteosarcoma (osteoblastic)		Mixed breed
753	2014	P5729707	D14-158	canine	เเรมโบ้	Male	Poodle	15	Bone	Osteosarcoma (Telangiectatic type)	>8years	Purebred
754	2014	P5729226	D14-039	canine	หมูปิ้ง	Female	Shitzu	9	Mass at right FL	Acantholytic squamous cell carcinoma with sebaceous hyperplasia	>8years	Purebred
755	2014	P5627755	D14-360	canine	ปุ้มปุ้ย	Male	Mixed	9	Perianal mass	Perianal gland carcinoma	>8years	Mixed breed
757	2014	P5730054	D14-262	canine	พีพี	Male	Mixed	10	skin mass(Abdominal area)	Sebaceous adenoma with pyogranulomatous dermatitis	>8years	Mixed breed
758	2014	P5729792	D14-195	canine	ดุ๊กดิ๊ก	Female	Shitzu	7	mass at vulva	Leiomyoma	≤8years	Purebred
759	2014	P5729512	D14-097	canine	ถุงทอง	Female	Golden Retriever	10	Bone	Osteosarcoma (fibroblastic ) was highly suspected	>8years	Purebred
761	2014	P5730122	D14-310	canine	น้ำหวาน	Female	Poodle	15	Skin mass (inguinal area)	Infiltrative lipoma	>8years	Purebred
762	2014	P5729891	D14-218	canine	ฟูฟู	Male	Mixed	11	Mass at right upper eyelid	Meibomian epithelioma	>8years	Mixed breed
763	2014	P5518943	D14-2203	canine	บาบู	Male	Pomeranian	7	Scrotal and testicular mass	Sertoli cell tumor	≤8years	Purebred
764	2014	P5306982	D14-2247	canine	บาบูน	Male	Mixed	11	skin mass	Fibrosarcoma	>8years	Mixed breed
765	2014	P5734383	D14-1819	canine	ปีโป้	Male	Chow Chow	5	Oral mass	Melanoma	≤8years	Purebred
766	2014	P5734152	D14-1648	canine	จูล้ง	Male	Mixed	13	Liver and splenic mass	Hemangiosarcoma	>8years	Mixed breed
767	2014	P5731711	D14-1103	canine		Male	Mixed	10	Mass at right eyelid	Cutaneosu histiocytoma	>8years	Mixed breed
768	2014	P5733410	D14-1338	canine	ลูกหว้า	Female	Mixed	12	Mass at right upper eyelid	Mast cell tumor grade 2	>8years	Mixed breed
769	2014	P5734736	D14-1777	canine	น้องขิม	Female	Golden Retriever	8	Skin mass (Lateral trunk)	Lipoma	≤8years	Purebred
770	2014	P5734852	D14-1804	canine	Liliy	Female	Golden Retriever	8	mass at vulva	Leiomyoma	≤8years	Purebred
771	2014	P5733808	D14-1489	canine	โอวัลติน	Female	Thai Ridgeback	5	Skin mass (inguinal area)	Apocrine adenocarcinoma	≤8years	Purebred
772	2014	P5517792	D14-1818	canine	เลย์	Male	Golden Retriever	11	Mass at HL	Melanoma	>8years	Purebred
773	2014	P5302869	D14-2173	feline	ดำ	Female	DSH	11	Mass in abdominal cavity	Adenocarcinoma metastasis	>8years	Mixed breed
774	2014	P5730537	D14-462	canine	หน้าหวาน	Male	Mixed	6	Mass at left FL	Apocrine adenocarcinoma	≤8years	Mixed breed
778	2014	P5628470	D14-1843	feline	Peper	Male	DSH	17	mass at left and right lateral trunk	Osteosarcoma, MCT	>8years	Mixed breed
779	2014	P5723399	D14-1157	canine	มินนี่	Female	Beagle	4 mo	Oral mass	Papilloma	≤8years	Purebred
780	2014	P5304678	D14-2046	canine	นาเดีย	Female	Yorkshire Terrier	9	Skin mass (Lumbar area)	Sevaceous epithelioma	>8years	Purebred
781	2014	P5735202	D14-2209	canine	เเม็กกี้	Female	Mixed	9	mass at Left FL	Infiltrative lipoma	>8years	Mixed breed
782	2014	P5838507	D15-0728	canine	โดโด้	Male	Mixed	15	Submandibular mass	Amelanotic melanoma	>8years	Mixed breed
783	2014	P5734746	D14-1797	canine	ไมโล	Female	Mixed	10	skin mass(Abdominal area)	Lipoma	>8years	Mixed breed
784	2014	P5734907	D14-1812	canine	ถุงหยก	Female	Cocker Spanial	10	Mass at uterus and vulva	Leiomyoma	>8years	Purebred
785	2014	P5731126	D14-1731	canine	บุ๋งกี้	Female	Mixed			ฺBasal cell tumor		Mixed breed
786	2014	P5520566	D14-1365	canine	เต้าหู้	Female	Golden Retriever	13	Ovarian mass	Theca cell tumor	>8years	Purebred
788	2014	P5628130	D14-1861	canine	บิ๊ก	Male	American Pitbull Terrier	5	Cecum	Leiomyoma was highly suspected	≤8years	Purebred
789	2014	P5840967	D14-1997	canine	ดัมมี่	Male	Mixed	11	Skin mass	Basosquuamous carcinoma	>8years	Mixed breed
790	2014	P5736380	D14-2214	canine	หูกวาง	Female	Mixed	10	Skin mass	Mast cell tumor grade 2	>8years	Mixed breed
791	2014	P5735920	D14-2149	canine	จ๋อมแจ๋ม	Male	Golden Retriever	9	Skin mass (shoulder)	Infiltrative lipoma with dilated pore and sebaceous hematoma	>8years	Purebred
792	2014	P5735849	D14-2246	canine	โจ	Male	Mixed	13	mass at prepuce	mast cell tumor grade 3	>8years	Mixed breed
793	2014	P5735852	D14-2229	canine	บราวด์	Female	Mixed	8	mass at inguinal area	Mast cell tumor grade 2	≤8years	Mixed breed
794	2014	P5736207	D14-2208	canine	ซินดี้	Female	Mixed	8	mass at distal part of left ulna	Chondroma	≤8years	Mixed breed
795	2014	P5731914	D14-932	canine	เซเว่น	Male	Shitzu	8	mass at mandible	Squamous cell carcinoma	≤8years	Purebred
797	2014	P5731714	D14-750	canine	มอมเเมม	Male	Shitzu	1	Mass at perianal area	Perianal gland adenoma	≤8years	Purebred
799	2014	P5732021	D14-862	canine	อังเปา	Male	Mixed	9	Mandibular nodule	Squamous cell carcinoma	>8years	Mixed breed
803	2014	P5730141	D14-626	canine	มดดำ	Female	Mixed	10	Skin mass	Mast cell tumor grade 2	>8years	Mixed breed
804	2014	P5730683	D14-457	canine	คิตตี้	Female	Pomeranian	3	Muscular infiltative mass	Osteosarcoma	≤8years	Purebred
805	2014	P5517566	D14-532	canine	ก๊วยเจ๋ง	Male	Poodle		Skin mass	Squamous cell carcinoma		Purebred
806	2014	P5301614	D14-673	canine	สังขยา	Female	Golden Retriever	9	Skin mass	Sebaceous carcinoma	>8years	Purebred
807	2014	P5730917	D14-690	canine	จีจี้	Female	Golden Retriever	8	Lymph node	Lymphoma	≤8years	Purebred
808	2014	P5731488	D14-674	canine	กีตาร์	Female	Labrador Retriever	6	Mass at perianal area	Perianal gland adenoma	≤8years	Purebred
809	2014	P5730855	D14-499	canine	ซุปเปอร์	Male	Poodle	5	nasal mass	Undifferentiated carcinoma	≤8years	Purebred
810	2014	P5730918	D14-531	canine	เกาลัด		Mixed	17	mass at inner ear	Ceruminous cystadenoma	>8years	Mixed breed
811	2014	P5731752	D14-754	canine	ปั๊ก	Female	Pug	14	skin mass at left sholder	Mast cell tumor grade 2	>8years	Purebred
812	2014	P5731265	D14-628	canine	โจ	Female	Labrador Retriever	10	Skin mass at abdominal area	Collagenous harmatoma with mild degree of dermatitis	>8years	Purebred
813	2014	P5410570	D14-609	canine	ป๊อปแป๊ป	Female	Mixed	13	Mass at vagina	Fibroma (durum)	>8years	Mixed breed
814	2014	P5729509	D14-456	canine	บลาวดี้	Male	Alsatian	11	mass at inguinal area	Malignant trichoepithelioma	>8years	Purebred
815	2014	P5730608	D14-458	canine	ชาร์คกี้	Female	Mixed	10	Mass at perianal area	Complex (mixed) Apocrine adenocarcinoma	>8years	Mixed breed
817	2014	P5517392	D14-506	canine	จิงจิง	Female	Mixed	2	vaginal mass	TVT(Transmissible venereal tumor)	≤8years	Mixed breed
819	2014	P5409615	D14-530	canine	Mickey	Male	Cocker Spanial	12	Mass at left HL	Basal cell tumor	>8years	Purebred
821	2014	P5306736	D14-492	canine	มอคค่า	Male	Mixed	7	Mass at perianal gland	Perianal gland carcinoma	≤8years	Mixed breed
824	2014	P5517874	D14-624	canine	Ralph	Male	Mixed	6	mass at prepuce	Hemangiosarcoma	≤8years	Mixed breed
825	2014	P5730703	D14-655	canine	ตุ๊กตุ๋น	Male	Mixed	15	mass at ventral of trunk	Mast cell tumor grade 2	>8years	Mixed breed
826	2014	P5731785	D14-755	canine	กาแฟ	Male	Shitzu		Chronic wound at tail	Granulation tissue-type hemangioma with pseudocarcinomatous epidermal hyperplasia		Purebred
827	2014	P5731972	D14-847	canine	นิล	Male	Mixed	6	Mass at perianal area	Hemangioma was highly suspected	≤8years	Mixed breed
828	2014	P5731214	D14-627	canine	แอร์เม	Female	Shitzu	8	vaginal mass	Fibrosarcoma	≤8years	Purebred
829	2014	P5731228	D14-610	canine	Big	Female	German Shepherd	7	Mass at mandibular symphysis	Acanthomatous ameloblastoma (Acanthomatous epulis)	≤8years	Purebred
830	2014	P5739650	D14-436	canine	ตัวยุ่ง	Male	French bulldog	9	Testicular mass	Mast cell tumor grade 2	>8years	Purebred
831	2013	P5306479	D13-1717	canine	ฟีฟ่า	Male	Beagle	3	Skin mass	Papilloma	≤8years	Purebred
834	2014	P5731073	D14-604	canine	ฟี่	Male	Siberian Husky	5	Mass at neck area	Basal cell tumor	≤8years	Purebred
835	2014	P5410045	D14-372	canine	บราวนี่	Female	Pomeranian	3	Skin mass at abdomen	Inflamed lipoma	≤8years	Purebred
836	2014	P5731248	D14-625	canine	มิโคริ	Female	Mixed	10	mass at abdominal area	Osteosarcoma	>8years	Mixed breed
837	2014	P5731180	D14-595	canine	เป๋าตุง	Male	Shitzu		mass at right HL	Sabaceous epithelioma		Purebred
838	2014	P5729905	D14-219	canine	ทองเเท่ง	Male	Golden Retriever	12	Testis	Seminoma	>8years	Purebred
839	2014	P5729515	57 B 014	canine	ช่วงช่วง		Mixed		Skin mass	Basosquamous epithelioma		Mixed breed
840	2014	P5625897	D14-201	canine	ฟูฟู	Male	Poodle	14	Skin mass at trunk	Sebaceous carcinoma	>8years	Purebred
841	2013	P5627604	56 B 2709	canine	มิกิ	Female	Shitzu	7	Skin mass	Fibrosarcoma	≤8years	Purebred
842	2014	P5730461	D14-404	canine	บันจี้	Male	Shitzu	7	Mass at perianal area	Perianal gland carcinoma	≤8years	Purebred
843	2014	P5305122	D14-253	canine	เบียร์	Female	Mixed	7	Mass at left upper eyelid	mast cell tumor	≤8years	Mixed breed
844	2014	P5729250	D14-060	canine	ซันโว	Male	Poodle	11	Testicular mass , Liver	Sertoli cell tumor, Seminoma	>8years	Purebred
845	2014	P5412636	D14-1898	canine	เชลซี	Male	Shitzu	8	nasal mass	TVT(Transmissible venereal tumor)	≤8years	Purebred
846	2014	P5409314	D14-293	canine	ขุนศึก	Male	Thai Ridgeback	6	Testis	Seminoma	≤8years	Purebred
847	2014	P5733444	D14-1875	canine	Diva	Female	Mixed	6	Skin mass at nose	Mast cell tumor grade 2	≤8years	Mixed breed
848	2014	P5735429	D14-1943	canine	เชลซี	Male	Golden Retriever	5	Mass at maxilla	Amelanotic melanoma	≤8years	Purebred
849	2014	P5733025	D14-1878	canine	เสือ	Male	Mixed	12	Skin mass at shoulder	Hemangiosarcoma	>8years	Mixed breed
852	2014	P5412344	D14-1853	canine	ดุ๊กดิ๊ก	Male	Poodle	10	Testicular mass	Benign complex prostate gland hyperplasia	>8years	Purebred
854	2014	P5734838	D14-1796	canine	ซูโม่	Female	Bull dog	4	Skin mass at axillary area, lymph node	mast cell tumor grade 3	≤8years	Purebred
856	2014	P5519855	D14-1754	canine	เเจ็ค	Male	Bangkaew	13	Mass at neck	Infiltrative lipoma	>8years	Purebred
858	2014	P5734885	D14-1803	canine	บุปผา	Female	Mixed	12	Skin mass at abdominal area	Mast cell tumor grade 2	>8years	Mixed breed
859	2014	P5734891	D14-1822	canine	Ginger	Female	Labrador Retriever		Mass at FL	Apocrine adenocarcinoma		Purebred
860	2014	P5623430	D14-1571	canine	ลูกโป่ง	Male	Mixed	7	nasal mass	Collagenous harmatoma with moderate subacute multifocal non-suppurative dermatitis	≤8years	Mixed breed
861	2014	P5733820	D14-1523	canine	ดีเซล	Male	Golden Retriever	10	Mass at the shoulder and tail	Hemangiomas	>8years	Purebred
862	2014	P5733939	D14-1522	canine	Rookie	Female	Mixed	6	Mass at left elbow	Fibrosarcoma	≤8years	Mixed breed
865	2014	P5734698	D14-1744	canine	ส้ม	Male	Mixed	10	Mass at neck , eye and nasal cavity	Mast cell tumor grade 2	>8years	Mixed breed
867	2014	P5724667	D14-1638	Feline	ไทเกอร์	Male	DSH	13	Mass at oral cavity	Fibromatous epulis	>8years	Mixed breed
868	2014	P5734235	D14-1620	canine	จิ๊กโก๋	Male	Miniature	16	Mass at gum	Fibrosarcoma	>8years	Purebred
869	2014	P5734355	D14-1705	canine	ปีใหม่	Male	Golden Retriever	10	Mass at the right inguinal area	Squamous cell carcinoma	>8years	Purebred
872	2014	P5733675	D14-1637	canine	บัตเตอร์	Male	Golden Retriever	12	Mass at the tarsal	Trichoblastoma	>8years	Purebred
873	2014	P5733289	D14-1361	canine	ก๋วยเตี๋ยว	Male	Mixed	6 mo	Mass at right phalange	Melanoma	≤8years	Mixed breed
874	2014	P5733149	D14-1286	canine	สตางค์	Female	Mixed	1	Skin mass at right HL	mast cell tumor grade 3	≤8years	Mixed breed
875	2014	P5411129	D14-1707	canine	โมเช่	Female	Mixed	13	Mass at right FL	Apocrine Cystadenoma	>8years	Mixed breed
877	2014	P5733870	D14-1499	canine	โฟร์โมด	Male	Shitzu	12	Mass at perianal area	Perianal gland carcinoma	>8years	Purebred
878	2014	P5734107	D14-1590	canine	สามจุด	Male	Mixed	8	Mass at the prepuce	Squamous cell carcinoma	≤8years	Mixed breed
879	2014	P5733735	D14-1429	canine	หมีหุ้ย	Male	Mixed	3	Nasal mass	TVT(Transmissible venereal tumor)	≤8years	Mixed breed
880	2014	P5629013	D14-1335	canine	หมอก	Male	Mixed	6	Mass at the left phalange	Mast cell tumor grade 2	≤8years	Mixed breed
882	2014	P5733228	D14-1555	canine	Friday	Female	Mixed	10	Mass at gingiva	Osteosarcoma	>8years	Mixed breed
883	2014	P5733801	D14-1505	canine	ติ๊ก	Male	Mixed	12	Mass at perianal area	Perianal gland epithelioma	>8years	Mixed breed
884	2014	P5303210	D14-1403	canine	มิคมิว	Male	Labrador Retriever	4	Mass in abdominal cavity	Mesothelioma, tumor cell infiltration of fat tissue	≤8years	Purebred
885	2014	P5733534	D14-1404	canine	โตโต้	Male	French bulldog	9	Mass at the perianal area	Perianal gland carcinoma	>8years	Purebred
886	2014	P5733292	D14-1336	canine	เเตงโม	Female	Poodle	15	Mass at vagina	Fibroma	>8years	Purebred
887	2014	P5731641	D14-1377	canine	น้ำตาล	Female	Shitzu	10	Mass at the interdigital area of the left forelimb	Mast cell tumor grade 2	>8years	Purebred
890	2014	P5733117	D14-1332	canine	ไจเเอ้นท์	Male	Mixed	7	Multiple mass at skin	mast cell tumor grade 3	≤8years	Mixed breed
891	2014	P5628562	D14-1308	canine	โกโก้	Male	Poodle	5	Testicular mass	Seminoma	≤8years	Purebred
892	2014	P5627006	D14-1191	canine	ไมโล	Female	Cocker Spanial	11	Mass	Hemangiopericytoma	>8years	Purebred
893	2014	P5625695	D14-1309	canine	จีจี้	Female	Mixed	11	Skin mass	Chondroblastic osteosarcoma	>8years	Mixed breed
894	2014	P5300549	D14-309	canine	เสือ	Male	Mixed	13	Testicular mass	Seminoma	>8years	Mixed breed
895	2013	P5628622	D13-1641	canine	โดนัท	Male	Dalmatian	10	Skin mass at scrotal sac	Hemangiosarcoma	>8years	Purebred
897	2014	P5733044	D14-1218	canine	จังกึม	Female	Golden Retriever	8	Mass at the eyelid	Papillomatous and pseudocarcinomatous epithelial hyperplasia	≤8years	Purebred
898	2014	P5732591	D14-1073	canine	หม้อดิน	Male	Mixed	9	Skin mass at the thoracic area	Apocrine Cystadenoma	>8years	Mixed breed
900	2014	P5732834	D14-1142	canine	ธงชัย	Male	Miniature	10	Oral mass	Melanoma	>8years	Purebred
901	2014	P5732513	D14-1040	canine	จัมโบ้	Male	Golden Retriever	6	Mass at the sublumbar area	Undifferentiated carcinoma	≤8years	Purebred
902	2014	P5732962	D14-1247	canine	จัมโบ้	Male	Golden Retriever	9	Splenomegaly	Hemangiosarcoma	>8years	Purebred
903	2014	P5520439	D14-1219	canine	น้ำพริกอ๋อง	Female	Labrador Retriever	11	Mass at right lower lip	Cutaneous histiocytoma	>8years	Purebred
904	2014	P5732928	D14-1158	canine	ดอลล่า	Male	Cocker Spanial	7	Mass at left 4th phalange	Cutaneous histiocytoma	≤8years	Purebred
905	2014	P5732418	D14-1019	canine	ชิกเก้น	Female	Mixed	4	Skin mass	Squamous cell carcinoma	≤8years	Mixed breed
907	2014	P5732032	D14-864	canine	มิลาน	Female	Poodle	12	Mass at oral cavity	Ameloblastoma	>8years	Purebred
908	2014	P5731149	D14-820	canine	มั่งมี	Male	Mixed	5	Mass at neck area	Lymphoma	≤8years	Mixed breed
909	2014	P5731885	D14-821	canine	เจนนี่	Female	Mixed	9	Mass at nipple	Acantholytic squamous cell carcinoma	>8years	Mixed breed
910	2014	P5628952	D14-962	canine	นำโชค	Male	Thai Ridgeback	5	Skin mass	Mast cell tumor grade 2	≤8years	Purebred
911	2014	P5732399	D14-997	canine	มินนี่	Female	Mixed	4 mo	Mass at the lip	Papilloma	≤8years	Mixed breed
912	2014	P5732309	D14-961	canine	ยู้ยี้	Male	Thai Ridgeback	10	Skin mass at abdominal area	Mast cell tumor grade 2	>8years	Purebred
913	2014	P5732412	D14-1077	Feline	พริตตี้	Female	DSH		Mass at the left eye	Squamous cell carcinoma		Mixed breed
916	2014	P5735207	D14-2067	canine	เเลค	Male	Poodle	10	Mass at the 2nd digit	Papilloma with pseudocarcinomatous epithelial hyperplasia	>8years	Purebred
919	2014	P5735694	D14-2029	canine	ไปรมา	Female	Mixed	10	Mass at abdominal area	Xanthogranuloma	>8years	Mixed breed
920	2014	P5735697	D14-2028	canine	ลำไย	Female	Miniature	12	Mass at frontal area of head	Squamous cell carcinoma	>8years	Purebred
921	2014	P5735580	D14-1992	canine	โยโย่	Female	Poodle	10	Mass at vagina	Leiomyoma	>8years	Purebred
922	2014	P5626412	D14-2027	canine	มันนี่	Male	Mixed	9	Mass at the rostral part of mandible	Acanthomatous ameloblastoma (Acanthomatous epulis)	>8years	Mixed breed
923	2014	P5410012	D14-2098	canine	ซินดี้	Male	Mixed	18	Mass at the left HL (Mass)	Osteosarcoma (Osteoblastic cell type)	>8years	Mixed breed
926	2014	P5413014	D14-2068	canine	บุ้งกี้	Male	Poodle	10	Mass at the left ear pinna	Invert papilloma with severe chronic-active multifocal necrotic-suppurative dermatis	>8years	Purebred
927	2014	P5306261	D14-2066	canine	เเมงมัน	Male	Clumber spaniel	11	Skin mass	Sebaceous carcinoma	>8years	Purebred
928	2014	P5734833	D14-2039	canine	วันเพ็ญ	Female	Poodle	1	Skin mass	Complex (mixed) Apocrine adenocarcinoma	≤8years	Purebred
929	2014	P5735480	D14-1993	canine	เเตงโม	Male	Mixed	10	Subcutaneous mass	Lipoma	>8years	Mixed breed
933	2015	P5304847	D15-2880	canine	มิฟฟี่	Female	Poodle		Skin mass	Lipoma		Purebred
934	2015	P5734689	D15-2835	canine	จั๊กจั๊ก	Male	Golden Retriever	7	Mass at the left HL and tip of prepuce	Cutaneous hemangiosarcoma	≤8years	Purebred
935	2015	P5844510	D15-2842	canine	ดอลล่า	Male	Mixed	11	Mass at neck and dorsal trunk	Sebaceous gland epithelioma	>8years	Mixed breed
936	2015	P5844662	D15-2826	canine	ศรีนวล	Female	Mixed	6	Mass at left flank	Fibrosarcoma	≤8years	Mixed breed
937	2015	P5837868	D15-0584	canine	ตาหวาน	Female	Mixed	11	Mass at lumbar area	Infiltrative lipoma with moderate degree of perivascular dermatitis	>8years	Mixed breed
938	2015	P5836625	D15-0140	canine	จูน	Female	Mixed	6	mass , bone	Osteosarcoma	≤8years	Mixed breed
939	2015	P5838304	58 B 56	canine	ถุงเท้า		Mixed		skin mass	Mast cell tumor, low grade		Mixed breed
940	2015	P5837824	D15-0428	canine	เปา	Male	Mixed	2	Mass at the eyelid	Mast cell tumor	≤8years	Mixed breed
941	2015	P5736229	D15-0315	canine	หมูกรอบ	Male	Pug	8	Oral mass	Ameloblastoma	≤8years	Purebred
942	2015	P5735539	D15-0167	canine	เจนนี่	Female	Mixed	10	Mass at right ear pinna	Squamous cell carcinoma	>8years	Mixed breed
943	2015	P5837118	D15-0230	Feline	จุ๋มจิ๋ม	Male	DSH	10	Mass at oronasal area	Squamous cell carcinoma	>8years	Mixed breed
944	2015	P5837639	D15-0371	canine	Millie	Female	Mixed	1	Skin mass	Sebaceous carcinoma	≤8years	Mixed breed
945	2015	P5736351	D15-0112	canine	มัฟฟิ้น	Female	Golden Retriever	12	Mass at digit	Osteosarcoma	>8years	Purebred
946	2015	P5736456	D15-0057	canine	เขียว	Male	Mixed	8	Renal mass	Renal carcinoma	≤8years	Mixed breed
947	2015	P5836695	D12-0058	canine	มิ่งขวัญ	Male	Mixed	11	Mass beside penis	Perianal gland epithelioma	>8years	Mixed breed
948	2015	P5836869	D15-0132	canine	ไมโล	Male	Mixed	10	Mass at dorsal of trunk	Basal cell carcinoma	>8years	Mixed breed
949	2015	P5732098	D15-0009	canine	ยูโร	Male	Mixed	15	Mass at rostral mandible	Amelanotic melanoma	>8years	Mixed breed
950	2015	P5412806	D15-0092	canine	ลัคกี้	Female	Mixed	9	Mass at phalanges	Papilloma with sebaceous gland hyperplasia	>8years	Mixed breed
951	2014	P5735944	D14-2124	canine	ฟลุ๊ก	Male	Mixed	5	Skin mass	Sebaceous adenoma	≤8years	Mixed breed
952	2015	P5732877	D15-0811	canine	หมีพูล	Male	Mixed	7	Mass at right flank	Hemangioma was highly suspected	≤8years	Mixed breed
953	2015	P5839069	D15-0809	canine	เพชรจักร	Female	Pekingese	13	Mass at upper lip	Melanoma	>8years	Purebred
954	2014	P5627392	D14-1778	canine	Chocco	Male	Miniature	9	Mass at perineal area	Perianal gland carcinoma	>8years	Purebred
955	2015	P5300838	D15-0207	canine	ทอง	Female	Labrador Retriever	13	Skin mass	Mass cell tumor grade 3	>8years	Purebred
956	2015	P5841372	D15-1815	canine	Hugo	Male	Mixed	10	Mass at lip and neck	Moderately differentiated squamous cells carcinoma	>8years	Mixed breed
957	2015	P5733963	D15-1930	canine	Ditto	Female	Miniature	13	Skin mass	Hemangiosarcoma	>8years	Purebred
958	2015	P5841054	D15-1906	canine	โดโด้	Male	Cocker Spanial	14	Mass at ear	Adenocarcinoma	>8years	Purebred
960	2015	P5841785	D15-1919	canine	โทน	Male	Mixed	5	Oral mass	Papilloma	≤8years	Mixed breed
962	2015	P5841909	D15-1899	canine	ป๊อด	Male	Chihuahua	7	Lymphadenopathy	Lymphoma	≤8years	Purebred
963	2015	P5842195	D15-1927	canine	ตาล	Female	Mixed		Mass at conjunctiva	Basosquamous carcinoma		Mixed breed
964	2015	P5409303	D15-2782	canine	ตูลูสส์	Female	Labrador Retriever	5	Mass at left foot	Hemangiopericytoma was suspected	≤8years	Purebred
965	2015	P5844471	D15-2783	canine	โดนัด	Male	Mixed	10	Mass at left HL	Hemangioma was highly suspected	>8years	Mixed breed
966	2015	P5844517	D15-2827	canine	เด่น	Male	Mixed	2	Mass at mandible	Basal cell carcinoma(Infiltrative type)	≤8years	Mixed breed
967	2015	P5518217	D15-2828	canine	Happy	Male	Mixed	14	Mass at prepuce	Mast cell tumor grade 2	>8years	Mixed breed
968	2015	P5517947	58B 256	canine	มะขาม		Mixed		Skin mass	Trichoblastoma (Basal cell tumor)		Mixed breed
969	2015	P5840799	58 B 240	canine	เปี๊ยก		Mixed		Skin mass	Mast cell tumor		Mixed breed
970	2015	P5300241	D15-2538	canine	แต้ม	Female	Mixed	12	Mass at lower eyelid	Meibomian gland adenocarcinoma	>8years	Mixed breed
971	2015	P5843568	D15-2525	canine	ละมุด	Female	Mixed	6	Mass at left adrenal gland	Transitional cell carcinoma	≤8years	Mixed breed
972	2015	P5416057	D15-2507	canine	เมรุ	Male	Labrador Retriever	11	Gingival mass	Osteoma	>8years	Purebred
977	2015	P5844010	D15-2591	canine	เปา	Male	Golden Retriever	6	Mass at skin	Cutaneous hemangioma	≤8years	Purebred
980	2015	P5841884	D15-2289	canine	ดิก		Mixed	15	Oral mass	Fibrosarcoma	>8years	Mixed breed
981	2015	P5843442	58 B 199	canine	กีวี		Mixed		Testicular tumor	Seminoma		Mixed breed
982	2015	P5842776	D15-2339	canine	หมี		Mixed	5	Frontal sinas mass	Squamous cell carcinoma	≤8years	Mixed breed
984	2015	P5839965	D15-1127	canine	นำโชค	Male	Mixed	2	Mass at lip	Transmissible venereal tumor	≤8years	Purebred
985	2015	P5843171	D15-2297	canine	นิล	Male	Rottweiler	5	​Mass at tongue	Lingual hemangioma	≤8years	Purebred
986	2015	P5836899	58 B 192	canine	อะตอม		Mixed		Nasal mass	Extragenital Canine Transimssible Venereal Tumor		Mixed breed
987	2015	P5841287	D15-1593	canine	โบว์นัด	Female	Golden Retriever	8	Mass at hip and anus	Fibrosarcoma	≤8years	Purebred
989	2015	P5839940	D15-1084	canine	Mocca		Poodle	11	Abdominal mass	Complex adenoma	>8years	Purebred
990	2015	P5837606	D15-0343	canine	ไปไป๋	Female	Sharpei	7	Mass at left elbow	Mast cell tumor grade 2	≤8years	Purebred
991	2015	P5837041	D15-0387	canine	โมเนะ	Male	Poodle	8	Mass at cervical area	Mast cell tumor grade 2	≤8years	Purebred
995	2015	P5836637	D15-0020	canine	สเปน	Female	Beagle	6 mon	Mass at facial	Basal cell tumor (Trichoblastoma)	≤8years	Purebred
996	2015	P5837297	D15-0494	canine	คู่ขา	Female	Poodle	10	Oral mass	Squamous cell carcinoma	>8years	Purebred
997	2015	P5414451	58 B 156	Canine	เบนเซนจิ		Mixed		Nasal mass	Malignant melanoma		Mixed breed
998	2015	P5409445	D15-1590	canine	นับทอง	Female	Poodle		Mass	Lipoma was highly suspected		Purebred
999	2015	P5627365	D15-1808	canine	เต้าเจี้ยว	Female	Bangkaew	11	Mass at hind limb	Mast cell tumor grade 2	>8years	Purebred
1000	2015	P5840903	D15-1521	canine	Luck	Female	Pug	8	Mass at right lower lip	Melanoma	≤8years	Purebred
1001	2015	P5837515	D15-1742	Feline	ทอง	Male	DSH	5	Nasal mass	Melanoma (ballooning type) with osteoblastic dysplasia	≤8years	Mixed breed
1003	2015	P5840664	D15-1314	canine	โมโม่	Male	Pekingese	9	Mass at dorsal of trunk	Melanoma	>8years	Purebred
1004	2015	P5840763	D15-1367	canine	สไปร์	Female	Beagle	3 mon	Mass at hard palate	Papilloma	≤8years	Purebred
1005	2015	P5841647	D15-1758	canine	ไมเคิล	Male	Mixed	3	Mass at left thorax	Lipoma	≤8years	Mixed breed
1006	2015	P5841850	D15-1760	Feline	กาละเเมร์	Male	DSH	3	Nasal mass	Squamous cell carcinoma was highly suspected	≤8years	Mixed breed
1007	2015	P5414951	D15-1608	canine	บาเซนจิ	Female	Mixed	4	Mass at the right nasal	Melanoma	≤8years	Mixed breed
1008	2015	P5840846	D15-1592	canine	มาร์ค	Male	Golden Retriever	5	Mass at right mandible	Fibrosarcoma	≤8years	Purebred
1009	2015	P5837469	D15-1864	canine	โดดเดี่ยว	Female	Mixed	8	Mass	Hemangiopericytoma	≤8years	Mixed breed
1010	2015	P5841150	D15-1809	canine	แบ่งบุญ	Male	Mixed	9	Lymph node	Lymphoma	>8years	Mixed breed
1011	2015	P5838765	D15-1481	canine	ชะม้อ	Female	Mixed	10	mass, lymph node	Mast cell tumor grade 2 with lymph node metastasis	>8years	Mixed breed
1012	2015	P5839325	D15-1433	canine	บูบู้	Male	Mixed	10	Mass at right mandible	Osteosarcoma	>8years	Mixed breed
1013	2015	P5408834	D15-0910	canine	ปุ้มปุ้ย		Mixed	14	Mass at right HL	Mast cell tumor grade 2	>8years	Mixed breed
1014	2015	P5839614	D15-1003	canine	โต๊ะโม๊ะ	Male	Mixed	10	Mass at perineal area	Basal cell carcinoma	>8years	Mixed breed
1015	2015	P5636977	D15-0879	canine	คาริเบอร์	Male	Mixed	3	Skin mass	Squamous cell carcinoma	≤8years	Mixed breed
1016	2015	P5840746	D15-1402	canine	หมอก	Male	Golden Retriever	11	Mass ar femur	Chondrosarcoma	>8years	Purebred
1019	2015	P5732673	D15-1447	Hamster	โรตี	Male	Giant	2	Mass at right ear pinna	Basal cell tumor	≤8years	Purebred
1020	2015	P5300807	D15-1395	canine	อุ่นใจ	Male	Mixed	7	Mass at trunk	Lipoma	≤8years	Mixed breed
1022	2015	P5626904	D15-1126	canine	อาร์เทอร์	Male	Cocker Spanial	12	Mass at skin	Hemangiosarcoma	>8years	Purebred
1023	2015	P5838879	D15-1174	canine	ทองหยอด	Female	Poodle	17	Oral mass	Melanoma	>8years	Purebred
1025	2015	P5839010	D15-0909	canine	โอเลี้ยง	Female	Mixed	10	Mass at cervical area	Melanoma	>8years	Mixed breed
1026	2015	P5839739	D15-1021	canine	ทองคำ	Male	Mixed	9	Mass at perineal area	Osteosarcoma (Giant cell type)	>8years	Mixed breed
1027	2015	P5626149	D15-1209	canine	ไจ๋ไจ๋	Male	Poodle	8	Mass at the the tail	Perianal gland carcinoma	≤8years	Purebred
1028	2015	P5840622	D15-1329	canine	ดูดู้	Male	Golden Retriever	6	Mass at the right forelimb	Osteosarcoma	≤8years	Purebred
1029	2015	P5409221	D15-1393	canine	บูบู้	Female	Mixed	10	Mass at righr lower lip	Mast cell tumor grade 2	>8years	Mixed breed
1030	2015	P5839313	D15-964	canine	Happy	Male	Mixed	9	Bone	Osteosarcoma(Fibroblastic) was highly suspected	>8years	Mixed breed
1031	2015	P5838388	D15-658	canine	แบมบู	Female	Miniature	13	Mass at the trunk	Mast cell tumor grade 2	>8years	Purebred
1032	2015	P5838601	D15-761	Feline	ปุ๊กกี้	Female	DSH	9		Solid-cystic apocrine edenoma	>8years	Mixed breed
1034	2015	P5837301	D15-0944	canine	บุญเติม	Male	Mixed	7	Mass in the left nasal cavity	Transmissible venereal tumor	≤8years	Mixed breed
1036	2015	P5305583	D15-0969	canine	ดุ๊ก	Male	Shitzu	7	Mass at the left upper eyelid	Meibomian gland epithelioma	≤8years	Purebred
1038	2015	P5408859	D15-0435	canine	คอนโด		Shitzu		Conjunctiva mass	Acantholytic squamous cell carcinoma		Purebred
1039	2015	P5412362	D15-0284	canine	มีมี่	Male	Shitzu	10	Right testicular	Sertoli cell tumor	>8years	Purebred
1040	2015	P5837354	D15-0266	canine	หลง	Male	Poodle	15	Mass at nose	Mast cell tumor grade 3	>8years	Purebred
1041	2015	P5519598	D15-0131	canine	จูโน่	Male	Bull dog	6	Mass at right FL	Mast cell tumor grade 2	≤8years	Purebred
1042	2015	P5836822	D15-0116	canine	เทเลอร์	Male	American Pitbull Terrier	8	Mass at scrotal sac	Mast cell tumor grade 2	≤8years	Purebred
1043	2014	P5735534	D14-1986	canine	ซูซ่า	Male	Shitzu	10	Left cormeal mass	Squamous cell carcinoma	>8years	Purebred
1044	2014	P5303623	D14-1874	canine	เงินทอง	Female	Bangkaew	13	Mass ar the stomach and liver	Gastric tubular adenocacinoma, liver metastasis	>8years	Purebred
1045	2014	P5734622	D14-1724	canine	Prize	Female	Mixed	1	Mass at ventral trunk	Cutaneous histiocytoma	≤8years	Mixed breed
1047	2015	P5844272	D15-2681	canine	ถุงเงิน	Female	Pug	8	Vaginal mass	Leiomyoma	≤8years	Purebred
1048	2015	P5300641	D15-2806	canine	Modi	Male	Mixed	5	Skin mass at the thoracic and abdominal area	Lipoma	≤8years	Mixed breed
1049	2015	P5521830	D15-2300	canine	ข้าวหอม	Female	Shitzu	10	Mass in neck area, lateral of the body	Lipoma with cysts	>8years	Purebred
1050	2015	P5842115	D15-1934	canine	โมจิ	Female	German Shepherd	4mon	Mass at the skull	Fibrosarcoma	≤8years	Purebred
1051	2015	P5628458	D15-1432	canine	ถุงเงิน	Female	Mixed	8	Intestinal mass	Fibrosarcoma	≤8years	Mixed breed
1052	2015	P5843228	58B210	canine	ใหม่		Mixed		Vaginal mass	Leiomyosarcoma		Mixed breed
1053	2015	P5842984	D15-2233	canine	ปั๊ป	Female	Poodle	8	Mass at ventral abdomen	Fibrosarcoma	≤8years	Purebred
1055	2015	P5300669	D15-1254	canine	Bento	Male	Mixed	10	Mass at right HL	Mast cell tumor grade 2	>8years	Mixed breed
1056	2015	P5840333	D15-1195	canine	มะขาม	Female	Poodle	9	Skin mass at right HL	Mast cell tumor grade 3	>8years	Purebred
1057	2015	P5837022	D15-0179	canine	มีทรัพทย์	Female	Siberian Husky	10	Vaginal mass	Fibroma (Durum)	>8years	Purebred
1058	2015	P5626429	D15-1806	canine	Pike	Male	Golden Retriever	9	Mass	Transmissible venereal tumor	>8years	Purebred
1059	2015	P5838513	D15-0690	canine	บุญมี	Female	Mixed	7	Liver	Hepatocellular carcinoma, diffuse vacuolar hepatocytes degeneration	≤8years	Mixed breed
1060	2015	P5839588	D15-0965	canine	เหมย	Female	Mixed	11	Mass at urinary bladder	Fibroma	>8years	Mixed breed
1061	2015	P5841170	D15-1607	canine	ต้า	Male	Miniature	8	Mass at perineal area	Perianal gland carcinoma	≤8years	Purebred
1062	2015	P5837479	D15-1526	Hedgehog	ชิชา			5	Subcutaneous mass	Anaplastic sarcoma	≤8years	Mixed breed
1063	2015	P5840456	D15-1255	canine	ลูกหมี	Female	Mixed	9	Skin mass	Lipoma	>8years	Mixed breed
1064	2015	P5839285	D15-0853	canine	บู้บี้	Female	Mixed	15	Mass at left pad	Plasma cell tumor	>8years	Mixed breed
1066	2015	P5838981	D15-0762	canine	น้ำหวาน	Female	Labrador Retriever	5	Mass at tail	Fibrosarcoma	≤8years	Purebred
1067	2015	P5838338	D15-0607	canine	เก๋า	Male	Mixed	7	Mass at dorsal of trunk	Osteoma cutis with squamous cell carcinoma	≤8years	Mixed breed
1068	2015	P5521128	D15-0401	canine	ปีเตอร์	Male	Doberman	9	Mass at thoracic area	Squamous cell carcinoma	>8years	Purebred
1069	2015	P5837325	D15-0344	canine	โอเว่น	Male	Golden Retriever	5	Mass at perineal area	Perianal gland epithelioma	≤8years	Purebred
1070	2015	P5837068	D15-0296	canine	เเบล็ค	Female	Mixed	9	Skin mass at perineal area	Fibrosarcoma	>8years	Mixed breed
1071	2015	P5837035	D15-0240	Feline	ข้าวสวย	Male	DSH	5months	Mass at right trunk	Adenocarcinoma	≤8years	Mixed breed
1072	2015	P5840662	58 B 214	canine	เบบี้	Female	Miniature	11	Urinary bladder mass	Transitional cell carcinoma		Purebred
1073	2015	P5410202	D15-1759	canine	สวาท	Male	Thai Ridgeback	5	Skin mass at back	Mast cell tumor with fibrinous dysplasia	≤8years	Purebred
1075	2015	P5837355	D15-0836	canine	แป้ง	Female	Mixed	14	Mass at lower eyelid	Meibomian gland carcinoma	>8years	Mixed breed
1076	2015	P5520789	D15-0236	canine	ดอลล่า	Female	Cocker Spanial	9	Mass at the perianal area	Basal cell carcinoma	>8years	Purebred
1077	2015	P5303313	D15-0962	canine	ไซโก้	Female	Golden Retriever	12	Mass at axillary area	Mast cell tumor grade 2	>8years	Purebred
1078	2015	P5839552	D15-0945	canine	เเฟนต้า	Male	Mixed	9	Mass at right testis	Seminoma	>8years	Mixed breed
1080	2015	P5839406	D15-0966	canine	ขาว	Male	Mixed	10	Skin mass	Mast cell tumor grade 3	>8years	Mixed breed
1081	2015	P5305403	D15-0019	canine	Max	Male	Mixed	9	Mass at soft palate	Malignant schwannoma	>8years	Mixed breed
1082	2015	P5838110	D15-0517	canine	ขาว	Female	Bangkaew	10	Mass at lower eyelid	Transmissible venereal tumor	>8years	Purebred
1083	2015	P5414399	D15-0189	canine	ชูชิ	Male	Shitzu	14	Perianal mass	Perianal gland carcinoma	>8years	Purebred
1084	2015	P5839252	D15-0852	canine	ฮันนี่	Female	Mixed		Mass at left ear	Melanocytoma		Mixed breed
1085	2015	P5415798	D15-2781	canine	โยกี้	Male	Pomeranian	11	Skin mass	Fibrosarcoma was suspected	>8years	Purebred
1086	2015	P5842869	D15-2799	canine	น้ำตาล	Female	Cocker Spanial	13	Vaginal mass	Leiomyoma	>8years	Purebred
1087	2015	P5843518	D15-2597	canine	โฟโมสต์	Female	Pomeranian	14	Urinary bladder mass	Transitional cell carcinoma (Papillary and infiltrating type)	>8years	Purebred
1088	2015	P5841231	D15-1553	canine	บุ้งกี้	Female	Mixed	16	Mass at lip	Basal cell carcinoma	>8years	Mixed breed
1091	2015	P5841589	D15-1683	canine	จีจี้	Male	Shitzu	9	Mass at the perianal area	Hepatoid gland epithelioma	>8years	Purebred
1092	2015	P5841093	D15-1497	canine	ขาว	Male	Mixed	7	Mass at ventral trunk	Fibrosarcoma	≤8years	Mixed breed
1093	2015	P5305057	D15-1428	Feline	นำโชค	Male	DSH	6	Mass at nasal cavity	Transitional cell carcinoma	≤8years	Mixed breed
1094	2015	P5839091	D15-1102	canine	ลักกี้	Male	Mixed	7	Mass at back	Basal cell carcinoma	≤8years	Mixed breed
1096	2015	P5841869	D15-1772	canine	Doey	Male	Beagle	7	Skin mass	Lipoma	≤8years	Purebred
1097	2015	P56233267	D15-1781	canine	มะขาม	Female	Mixed	13	Mass at digit and lymph node	Histiocytoma with metastasis	>8years	Mixed breed
1098	2015	P5841808	D15-1744	canine	บุญมี	Female	Mixed	3	Mass at trunk	Liposarcoma (Low grade malignancy)	≤8years	Mixed breed
1099	2015	P5841692	D15-1714	canine	หน่า	Female	Mixed	5	Mass in the abdomen	Thecoma	≤8years	Mixed breed
1100	2015	P5839864	D15-1589	canine	แอนดี้	Male	Siberian Husky	10	Mass at right testis	Seminoma	>8years	Purebred
1101	2015	P5841314	D15-1595	canine	มูมู่	Male	Shitzu	15	​Mass at inguinal area	Seminoma	>8years	Purebred
1102	2015	P5843584	D15-2483	canine	Spot	Female	Siberian Husky	13	Mass at mandible	Malignant melanoma	>8years	Purebred
1103	2015	P5736548	D15-2368	canine	เเว่น	Male	Mixed	14	Mass at perineal area	Anal sac adenocarcinoma	>8years	Mixed breed
1104	2015	P5843204	58 B 182	canine	โชค		Mixed		Skin mass	Mass cell tumor high grade		Mixed breed
1105	2015	P5732427	D15-2185	canine	แป้ง	Female	Golden Retriever	7	Skin mass	Cutaneous hemangiosarcoma	≤8years	Purebred
1106	2015	P5842868	D15-2216	canine	พุดดิ้ง	Female	Shitzu	10	Skin mass	Sebaceous gland adenoma	>8years	Purebred
1107	2015	P5415490	D15-1898	canine	Poppy	Female	Pug	3	Skin mass	Trichoepithelioma	≤8years	Purebred
1108	2015	P5301936	D15-1066	canine	ป้าง	Male	Mixed	7	Mass at right thoracic	Lipoma	≤8years	Mixed breed
1109	2015	P5818818	D15-0738	canine	คูก้า	Male	Mixed	14	Mass at right upper lip	Fibrosarcoma	>8years	Mixed breed
1110	2015	P5837792	D15-0426	canine	ตัวเล็ก	Female	Mixed	6	Mass at skin	Peripheral nerve sheath tumor(Schwannoma)	≤8years	Mixed breed
1112	2014	P5732874	D14-1260	canine	เต้าหู้	Male	Cocker Spanial	7	Mass at oral cavity	Fibrosarcoma	≤8years	Purebred
1113	2014	P5732886	D14-1162	canine	เเบล็คกี้	Male	Mixed	10	Mass at the left HL	Osteosarcoma( Osteoblastic type)	>8years	Mixed breed
1114	2015	P5730007	D15-0606	canine	แม็กกี้	Female	Collie	2	Mass at neck	Basal cell tumor	≤8years	Purebred
1115	2015	P5838037	d15-0478	canine	บราวนี่	Female	Labrador Retriever	11	Mass at vagina	Fibroma (Durum)	>8years	Purebred
1116	2015	P5837594	D15-0388	canine	เเซนวิส	Male	Miniature	11	Skin mass	Sebaceous epithelioma	>8years	Purebred
1117	2015	P5836762	D15-0297	canine	ลูกหมี	Male	Mixed	10	Mass at left axillary area	Adenocarcinoma	>8years	Mixed breed
1118	2015	P5841551	D15-1712	canine	กระติ๊บ	Male	Shitzu	4	Mass in dorsal trunk	Lipoma with chronic inflammation	≤8years	Purebred
1119	2015	P5840863	D15-1743	canine	ซิ่น	Female	Mixed	10	Mass at urethra	Fibroma	>8years	Mixed breed
1120	2015	P5840110	D15-1125	canine	ดอลล่า	Male	Pomeranian	10	Mass at mandible	Fibromatous epulis	>8years	Purebred
1121	2015	P5840123	D15-1124	canine	ก๋วยเจ๋ง	Male	Golden Retriever	14	Oral mass	Melanoma	>8years	Purebred
1122	2015	P5839343	D15-1005	canine	บัวลอย	Female	American Pitbull Terrier	4	Bone	Osteosarcoma	≤8years	Purebred
1124	2015	P5839360	D15-0877	canine	ลักกี้		Mixed	14	Mass at perineal area	Perianal gland carcinoma	>8years	Mixed breed
1125	2015	P5837239	D15-878	canine	หมั่นโถว	Female	Mixed	8	Mass at right FL	Acantholytic squamous cell carcinoma	≤8years	Mixed breed
1126	2015	P5837352	D15-970	canine	วีวี่	Female	Pomeranian	14	Mass at vagina	Fibtoma (Durum)	>8years	Purebred
1127	2015	P5844664	D15-2836	canine	มอมเเมม		Mixed		Mass at perineal area	Hepatoid gland carcinoma		Mixed breed
1129	2015	P5843113	D15-2288	canine	เฉาก๊วย	Female	Mixed	6	Mass at urinary bladder	Transitional cell carcinoma	≤8years	Mixed breed
1130	2015	P5519954	D15-2186	canine	Branson	Male	Dogue de Bordeaux	4	Skin mass	Apocrine gland adenocarcinoma(Complex)	≤8years	Purebred
1131	2015	P5842150	D15-1905	canine	อ้วน	Male	Mixed	15	Skin mass	Fibrosarcoma	>8years	Mixed breed
1132	2015	P5842169	D15-1904	canine	เเซลลี่	Female	Labrador Retriever	8	Mass at ear	Trichoepithelioma	≤8years	Purebred
1134	2015	P5301232	D15-0603	canine	ขวัญ	Female	Thai Ridgeback	11	Mass at right eyelid	Melanoma	>8years	Purebred
1135	2014	P5735890	D14-2172	Feline	ตาลอ่อน	Female	DSH	3	Mass at head	Anaplastic histiocytic sarcoma	≤8years	Mixed breed
1136	2014	P5736242	D14-2215	Feline	น้ำตาล	Female	DSH	5	Mass at oral cavity	Squamous cell carcinoma	≤8years	Mixed breed
1139	2015	P5838232	D15-0725	canine	โดโด้	Male	Golden Retriever	8	Urinary bladder mass	Squamous cell carcinoma	≤8years	Purebred
1140	2015	P5838658	D15-0808	canine	มอมเเมม	Male	Shitzu	7	Mass at cervical area	Osteosarcoma (Giant cell type)	≤8years	Purebred
1142	2015	P5839266	D15-0851	canine	ข้าวเหนียว	Male	Miniature	10	Mass at neck	Trichoblastoma (Basal cell tumor)	>8years	Purebred
1143	2015	P5838799	D15-0730	canine	อ้วน	Male	Mixed	10	Mass at upper lip	Amelanotic melanoma	>8years	Mixed breed
1145	2015	P5520733	D15-1043	canine	ไมโล	Male	Labrador Retriever	6	Testicular tumor	Sertoli cell tumor, seminoma	≤8years	Purebred
1146	2015	P5839854	D15-1042	canine	บาร์ซู	Female	English cocker	20	Mass at dorsal of trunk	Squamous cell carcinoma	>8years	Purebred
1147	2015	P5836671	D15-2598	canine	ติงลี่	Male	Mixed	9	Mass at urinary bladder	Leiomyoma	>8years	Mixed breed
1148	2015	P5842011	58 B 197	canine	Google		Mixed		Skin mass	Lymphoma, high grade		Mixed breed
1151	2015	P5842553	D15-2069	canine	ซันวา	Male	American Pitbull Terrier	8	Mass	Mast cell tumor grade 2	≤8years	Purebred
1152	2015	P5842228	D15-1998	canine	ลุกดิ๊ก	Male	Mixed	14	Mass at oral cavity	Fibrosarcoma	>8years	Mixed breed
1153	2015	P5840964	D15-1518	canine	ส้ม	Female	Mixed	9	Skin mass	Melanoma	>8years	Mixed breed
1154	2015	P5733434	58 B 205	canine	โตโด้	Male	French bulldog	10	Skin mass	Mast cell tumor, low grade		Purebred
1155	2015	P5519028	D15-2439	Feline	ไข่เจียว	Male	Persian	3	Mass at left corneal sequestrum	Feline primary ocular sarcoma (Post-traumatic sarcoma)	≤8years	Purebred
1157	2015	P5842238	D15-2016	canine	เซน่า	Female	American Pitbull Terrier	3	Skin mass	Lipoma	≤8years	Purebred
1158	2015	P5307768	D15-1870	canine	ลูกเดือย	Female	Mixed	11	Skin mass	Sebaceous epithelioma	>8years	Mixed breed
1159	2015	P5519115	D15-1619	canine	ยุกยิก	Female	Mixed	5	Mass	Mast cell tumo grade 1	≤8years	Mixed breed
1161	2015	P5839087	D15-1006	canine	ดี๊	Female	Mixed	8	Skin mass	Lipoma	≤8years	Mixed breed
1162	2015	P5839902	D15-1067	canine	จัมโบ้	Male	Cocker Spanial	12	Mass at left abdominal area	Trichoblastoma (Basal cell tumor)	>8years	Purebred
1163	2015	P5842261	D15-2017	Sugar glider	ช้อปเปอร์	Male	Sugar glider	8 months	Oral mass	Melanoma(Spindle type) / Fibrosarcoma	≤8years	Purebred
1164	2016	P5732781	D16-2171	canine	Tao		Mixed		Mass at left lower eyelid	Squamous cell carcinoma		Mixed breed
1166	2016	P5950089	D16-2006	canine	ตัวเล็ก	Female	Shitzu	10	Mass at right corneal	Squamous cell carcinoma	>8years	Purebred
1168	2016	P5736237	59 B 121	canine	ดีดี้	Male	Shitzu	6	Corneal mass	Squamous cell carcinoma, well differentiated type		Purebred
1170	2016	P5948877	59 B 117	canine	Tao		Mixed		Eyelid mass	Squamous cell carcinoma, well differentiated type		Mixed breed
1171	2016	P5947377	D16-0840	canine	ขนมปัง	Female	Pomeranian	13	Mass at left lower eyelid	Squmous cell carcinoma was highly suspected	>8years	Purebred
1172	2016	P5730202	D16-2686	canine	มุม	Male	Mixed	10	Mass at right FL	Malignant melanoma	>8years	Mixed breed
1173	2016	P5950111	D16-1941	canine	น้ำปลา	Male	Poodle	11	Mass at left FL	Cutaneous plasma cell tumor	>8years	Purebred
1174	2016	P5947620	D16-0889	canine	กระปุก	Female	German Shepherd	6	Mass at the lower lip	Canine cutaneous histiocytoma was highly suspected	≤8years	Purebred
1175	2016	P5307920	D16-1726	canine	กังฟู	Female	Mixed	10	Mass at the left hind limb(footpad area)	Lipoma	>8years	Mixed breed
1176	2016	P5951258	D16-2379	canine	มารวย	Male	Mixed	11	Mass at the right lower lip	Malignant melanoma	>8years	Mixed breed
1177	2016	P5952418	D16-2785	canine	จิ้มลิ้ม	Female	Shitzu	10	Mass at vulva	Fibroma	>8years	Purebred
1178	2016	P5951312	D16-2381	canine	ลาเต้	Male	Mixed	5	Mass at right FL	Trichoblastoma ( spindle cell type)	≤8years	Mixed breed
1179	2016	P5951115	D16-2321	canine	เเบงค์	Male	Mixed	13	Mass at sublingual area	Oral malignant melanoma	>8years	Mixed breed
1182	2016	P5951313	D16-2410	canine	เย็นลี่	Female	Mixed	5	Mass at the dorsal of neck	Trichoblastoma (Trabecular cell type)	≤8years	Mixed breed
1183	2016	P5625102	D16-2463	canine	เหม่เหม	Female	Shitzu	10	Mass at trunk and tail	Squamous cell carcinoma	>8years	Purebred
1184	2016	P57333963	D16-1024	canine	Ditto		Miniature	13	Skin mass	Mast cell tumor grade 2	>8years	Purebred
1185	2016	P5948924	D16-1428	canine	น้ำหวาน	Female	American Pitbull Terrier	7	Skin mass	Cutaneous hemangiosarcoma	≤8years	Purebred
1186	2016	P5950073	D16-1876	canine	โกโก้	Male	Cocker Spanial	9	Skin mass	Sabaceous adenoma	>8years	Purebred
1187	2016	P5842653	D16-1902	canine	ฮีโร่	Male	Poodle	14	Mass at scrotum	Mast cell tumor grade 2 with mast cell tumor metastasis	>8years	Purebred
1189	2016	P5844862	D16-0009	canine	ทูโทน	Male	Mixed	7	Mass at upper lip	Malignant melanoma	≤8years	Mixed breed
1190	2016	P5945148	D16-0461	canine	ศรีอ้วน	Female	Mixed	12	Mass at left HL	Undifferentiated sarcoma	>8years	Mixed breed
1192	2016	P5947438	D16-0890	canine	คาราเมล	Male	Mixed	13	Mass at left lower lip	Oral malignant melanoma	>8years	Mixed breed
1193	2016	P5947463	D16-2191	canine	ดำ	Male	Mixed	8	Mass at digit (Bone)	Osteochondroma was highly suspected	≤8years	Mixed breed
1195	2016	P5945324	D16-0945	canine	Lilo	Male	Mixed	15	Skin mass	Mast cell tumor grade 2	>8years	Mixed breed
1196	2016	P5948061	D16-1123	canine	หนูเเดง	Female	Poodle	14	Mass at liver	Cholangiocarcinoma	>8years	Purebred
1197	2016	P5408506	D16-1852	canine	ข้าวตู	Female	Golden Retriever	10	Skin mass	Infiltrative lipoma	>8years	Purebred
1198	2016	P5950419	D16-2029	canine	มอมเเมม	Female	Mixed		Skin mass	Mast cell tumor grade 2		Mixed breed
1199	2016	P5951916	D16-2615	canine	ลักกี้	Female	Mixed	17	Mass at ventral thorax and interdigital of left HL	Mast cell tumor grade 2	>8years	Mixed breed
1200	2016	P5625272	D16-0074	canine	อังกอล์	Male	Mixed	5	Mass at third digit	Papilloma	≤8years	Mixed breed
1201	2016	P5840747	D16-0674	canine	บุญนำพา	Male	Mixed	5	Mass at left HL	Apocrine gland carcinoma	≤8years	Mixed breed
1202	2016	P5945529	D16-0247	canine	นวล	Female	Mixed	11	Skin mass at the left elbow	Fibrosarcoma	>8years	Mixed breed
1203	2016	P5843760	D16-0390	canine	ขาว	Male	Mixed	12	Skin mass at cervical area	Fibrosarcoma was highly suspected	>8years	Mixed breed
1204	2016	P5946897	D16-0783	canine	ฮิปโป	Male	Cocker Spanial	13	Mass at ear pinna	Sebaceous gland epithelioma	>8years	Purebred
1205	2016	P5947508	D16-0946	canine	มอมเเมม	Female	Mixed	13	Mass at abdomen	Mast cell tumor grade 2	>8years	Mixed breed
1209	2016	P5945961	D16-0481	canine	ฮาเล่	Male	Dachshund	6	Mass at liver	Lymphom was highly suspected	≤8years	Purebred
1210	2016	P5945950	D16-0480	canine	มิ	Male	Mixed	6	Mass at left HL	Mast cell tumor with sebaceous gland dysplasia	≤8years	Mixed breed
1211	2016	P5945922	59 B 32	canine	ฟรังเฟรีย	Female	Mixed		Splenic mass	Splenic lymphoma is suggusted		Mixed breed
1212	2016	P5947283	D16-0871	canine	จิ้นส้ม	Male	Mixed	9	Mass at left HL	Lipoma	>8years	Mixed breed
1213	2016	P5947490	D16-1049	canine	เฮง เฮง	Female	Mixed	11	Mass at perianal area	Hepatoid gland adenoma with ductal differentiation	>8years	Mixed breed
1214	2016	P5949358	D16-1608	canine	บัดดี้	Male	Golden Retriever	8	Mass at lateral thorax	Collagenous hamartomas	≤8years	Purebred
1215	2016	P5949088	D16-1505	canine	จูมง	Female	Poodle	9	Vaginal mass	Fibroma	>8years	Purebred
1216	2016	P5946379	D16-1504	Feline	เเอ๋ว	Female	DSH	3	Vaginal mass	Leiomyoma	≤8years	Mixed breed
1217	2016	P5949115	D16-1526	Feline	พลอย	Female	DSH		Mass at left side of thorax	Fibrosarcoma associated with multinucleated giant cell infiltration		Mixed breed
1218	2016	P5731247	D16-1213	canine	บีทเทิ้ล	Female	Schnauzer	9	Mass at left ear	Trichoblastoma (ribbon type)	>8years	Purebred
1219	2016	P5949981	D16-1853	canine	เเบมบี	Female	Mixed	1	Mass the descending colon	Leiomyoma	≤8years	Mixed breed
1220	2016	P5951048	D16-2349	canine	น้องผี	Male	Mixed		Nasal mass	Trasmissible venereal tumor (TVT)		Mixed breed
1221	2016	P5950552	D16-2469	canine	Black	Male	Mixed	5	Mass at left HL	Cutaneous melanoma	≤8years	Mixed breed
1222	2016	P5951217	D16-2378	canine	โรมิโอ	Male	Golden Retriever	5	Mass at tongue	Hemangiosarcoma	≤8years	Purebred
1223	2016	P5302086	D16-0349	canine	คอฟฟี่	Male	Mixed	9	Mass at abdomen	Mast cell tumor grade 2	>8years	Mixed breed
1224	2016	P5734729	D16-0348	canine	คาวบอย	Male	Mixed	21	Mast at right ear	Squamous cell carcinoma	>8years	Mixed breed
1225	2016	P5733923	D16-1663	canine	ไอติม	Male	Poodle	11	Mass at forehead (Upper left eyelid)	Cutaneous melanocytoma	>8years	Purebred
1226	2016	P5950838	D16-2208	canine	โมจิ	Female	Golden Retriever	10	Mass at right cervical area	Adenocarcinoma was highly suspected	>8years	Purebred
1229	2016	P5946489	D16-0572	canine	คำเอ้ย	Female	Shitzu	12	Skin mass	Squamous cell carcinoma	>8years	Purebred
1230	2016	P5947688	D16-0896	canine	หมี	Male	Mixed	3	Mast at intestine	Leiomyoma	≤8years	Mixed breed
1231	2016	P5843772	D16-1174	canine	มันนี่	Female	Golden Retriever	8	Mast at right perianal area	Leiomyosarcoma	≤8years	Purebred
1232	2016	P5946868	D16-1075	canine	หมูดำ	Female	Mixed	>10	Mass at right buccal area	Leiomyoma	>8years	Mixed breed
1233	2016	P5950403	D16-2154	canine	จ๋อย	Female	Mixed	8	Right ovary	Granulosa cell tumor	≤8years	Mixed breed
1237	2016	P5935516	D16-2142	canine	Black	Male	Mixed	5	Mass at left leg	Basal cell tumor	≤8years	Mixed breed
1238	2016	P5950895	D16-2306	canine	เต๋ย		Mixed		Mass at right axillary area	Mast cell tumor grade 2		Mixed breed
1239	2016	P5949688	D16-1914	canine	ครัวซอง	Female	Poodle	10	Vaginal mass	Leiomyoma	>8years	Purebred
1240	2016	P5948910	D16-2141	canine	น้ำตาล	Female	Poodle	10	Nasal mass	Osteosarcoma	>8years	Purebred
1241	2016	P5949650	D16-1916	canine	หยก	Female	Mixed	16	Vaginal mass	Fibrosarcoma	>8years	Mixed breed
1242	2016	P5950124	D16-1940	canine	Panda	Female	American bully	5	Mass at right HL	Cutaneous hemangiosarcoma	≤8years	Purebred
1243	2016	P5950175	D16-2028	canine	ปังปอนด์	Male	Labrador Retriever	10	Mass at ventral part of the tail	Hepatoid gland carcinoma	>8years	Purebred
1244	2016	P5949550	D16-2063	canine	บลูเลเบิ้ล	Female	Mixed	9	Mass in oral cavity	Amelanotic melanoma	>8years	Mixed breed
1245	2016	P5949876	D16-1989	canine	บีบี	Female	Miniature	9	Mass at the urinary bladder	Transitional cell carcinoma (TCC),papillary infiltrative type	>8years	Purebred
1246	2016	P5949856	D16-1915	canine	วาว่า	Female	Chihuahua	16	Mass at the right maxillary area	Acanthomatous ameloblastoma (acanthomatous epulis)	>8years	Purebred
1247	2016	P5946332	D16-1962	Feline	ตุ้มเม้ง	Male	DSH	15	Mass at ventral part of neck	Mixed apocrine carcinoma	>8years	Mixed breed
1248	2016	P5945359	D16-0739	canine	ข้าวเม่า	Female	Mixed	14	Mass at liver	Hepatocellular carcinoma ( solid with clear-cell type)	>8years	Mixed breed
1250	2016	P5842219	D16-1768	canine	หมูยอ	Female	Poodle	12	Mass at right nasal tract	Canine nasal chondrosarcoma	>8years	Purebred
1251	2016	P5949753	D16-1801	canine	สำลี	Female	Mixed		Skin mass	Lipoma		Mixed breed
1252	2016	P5949327	D16-1769	canine	หวาน	Female	Mixed	8	Mass at right hip	schwannoma	≤8years	Mixed breed
1253	2016	P5945363	D16-1725	canine	ทองก้อน	Female	Thai Ridgeback	4	Mass at left metacarpus	Cutaneous plasma cell tumor	≤8years	Purebred
1254	2016	P5948868	D16-1460	canine	สีนิล	Male	Mixed	10	Mass at right axillary area	Cutaneous lymphoma was highly suspected	>8years	Mixed breed
1255	2016	P5948650	D16-1482	canine	กุนเชียง	Female	Cocker Spanial	12	Mass at left perianal area	Perianal gland adenocarcinoma	>8years	Purebred
1256	2016	P5735130	D16-1544	canine	ชิชาง	Male	Mixed	11	Skin mass	Apocrine gland adenocarcinoma (complex type)	>8years	Mixed breed
1257	2016	P5948593	D16-1484	canine	ร็อดดิก	Male	Mixed		Mass at digit	Mast cell tumor grade 2		Mixed breed
1258	2016	P5946325	D16-1527	canine	เต่าทอง	Male	Mixed	17	Mass at prepuce	Mast cell tumor grade 2	>8years	Mixed breed
1260	2016	P5949399	D16-1687	canine	ปังปอน	Male	Bangkaew	11	Mass at right axillary area	Mast cell tumor grade 2	>8years	Purebred
1261	2016	P5625543	D16-1340	canine	หมูตุ๋น	Female	Golden Retriever	5	Mass at ventral part of neck	Localized histiocytic sarcoma	≤8years	Purebred
1263	2016	P5948691	D16-1341	canine	ช็อคโกเเลต	Male	Mixed	8	Mass at skin	Cutaneous melanoma was highly suspected	≤8years	Mixed breed
1264	2016	P5946016	D16-0424	canine	ลาเกอร์	Male	Poodle	12	Skin mass at lumbar and left HL	Squamous cell carcinoma	>8years	Purebred
1265	2016	P5839884	D16-1320	canine	แอนดี้	Male	Siberian Husky	12	Splenic mass	Hemangiosarcoma	>8years	Purebred
1266	2016	P5945005	D16-0037	canine	น้ำข้าว	Male	Poodle	5	Mass at soft palate	Malignant melanoma	≤8years	Purebred
1267	2016	P5946557	D16-0598	canine	ปีใหม่	Male	Mixed	8	Mass at the perianal area	Lipoma	≤8years	Mixed breed
1268	2016	P5946043	D16-0924	canine	บัดดี้	Female	Mixed	3	Mass at vulva	Infiltrative lipoma	≤8years	Mixed breed
1269	2016	P5843342	D16-0822	canine	เเจ๊คกี้	Male	Beagle	1	Mass at chin	Papilloma	≤8years	Purebred
1270	2016	P5945197	D16-0120	Feline	ดาร์ลี่	Male	DSH	1	Mass	Mesothelioma (Epitheloid)	≤8years	Mixed breed
1271	2016	P5946209	D16-0525	canine	เอ็ม	Male	Bangkaew	13	Mass at right HL	Mast cell tumor grade 2	>8years	Purebred
1272	2016	P5946985	D16-0820	Feline	ลัคกี้	Male	DSH	7	Nasal mass	Melanoma with epidermal ulceration was highly suspected	≤8years	Mixed breed
1273	2016	P5302036	D16-1175	canine	อาฟูก	Female	Chihuahua	8	Mass at interdigital area of HL	Mast cell tumor grade 2	≤8years	Purebred
1274	2016	P5946080	D16-0441	canine	กุ้ยช่าย	Female	Golden Retriever	9	Mass at left upper lip	Oral malignant melanoma	>8years	Purebred
1276	2016	P5410104	D16-1190	canine	ลักกี้	Male	Mixed	7	Mass at the perianal area	Apocrine adenocarcinoma	≤8years	Mixed breed
1278	2016	P5948269	D16-1189	canine	Spiky	Male	Golden Retriever	12	Mass at the right axillary area	Malignant melanoma	>8years	Purebred
1282	2016	P5946205	D16-0573	canine	ซีอิ๊ว	Female	Bangkaew	13	Mass at the perianal area	Anal sac gland carcinomas	>8years	Purebred
1283	2016	P5948260	D16-1109	canine	เเพนดี้	Female	Bangkaew	4	Mass at abdomen	Mesothelioma (Epitheloid)	≤8years	Purebred
1288	2016	P5948379	D16-1202	canine	ทู่	Male	Mixed	14	Mass at distal of left radius (Bone)	Osteosarcoma	>8years	Mixed breed
1289	2016	P5412012	D16-0907	canine	ไมโจ	Male	Labrador Retriever	12	Mass at the right hindlimb	Osteosarcoma	>8years	Purebred
1290	2016	P5947504	D16-1090	Feline	น้องเหรียญ	Female	DSH	14	Mass at the upper eyelid	Malignant melanoma	>8years	Mixed breed
1292	2016	P5945254	D16-0158	canine	ป๋อง	Male	Pekingese	8	Mass at tail and prepuce	Hepatoid gland adenoma	≤8years	Purebred
1295	2016	P5946485	D16-0575	canine	Pitzi	Female	Shitzu	14	Mass at cervical area	Mast cell tumor grade 2	>8years	Purebred
1297	2016	P5945309	D16-0767	canine	มะลิ	Female	Mixed	5	Mass at the right lateral trunk	Lipoma	≤8years	Mixed breed
1299	2016	P5945668	D16-0460	canine	ติ๊ก	Male	Mixed	5	Oral mass	Oral malignant melanoma	≤8years	Mixed breed
1300	2016	P5945604	D16-0272	canine	บุญก้ำ	Female	Mixed	14	Skin mass	Mast cell tumor grade 2	>8years	Mixed breed
1301	2016	P5945322	D16-0157	canine	สโนว์	Female	Poodle	13	Mass at vulva, lymph node	Mast cell tumor grade 2 with metastasis	>8years	Purebred
1303	2016	P5844241	D16-0287	canine	ถุงทอง	Male	Mixed	4	Mass at penis	Transmissible venereal tumor (TVT) was highly suspected diagnosis	≤8years	Mixed breed
1304	2016	P5945759	D16-0314	canine	โก้ง	Male	Mixed	10	Mass at penis	Squamous cell carcinoma	>8years	Mixed breed
1305	2016	P5628983	D16-0076	canine	โมจิ	Female	Mixed	6	Mass at ventral thoracic area	Mast cell tumor grade 2	≤8years	Mixed breed
1306	2016	P5844094	D16-0128	Feline	สุขโข	Male	DSH	8	Mass at right ear	Feline cutaneous mast cell tumor	≤8years	Mixed breed
1307	2016	P5843058	D16-0089	canine	ตังเม	Female	Mixed	14	Mass at right ear canal	Basosquamous carcinoma	>8years	Mixed breed
1309	2016	P5303851	D16-1360	canine	ตาล	Female	Mixed	11	Vaginal mass	Fibrosarcoma	>8years	Mixed breed
1310	2016	P5844378	D16-1429	canine	หมูเเฮม	Male	Shitzu	10	Skin mass	Trichoblastoma (ribbon type)	>8years	Purebred
1311	2016	P5948570	D16-1245	canine	กุ้ชชี่	Female	Shitzu	13	Mass at vagina	Fibroma	>8years	Purebred
1312	2016	P5300522	D16-1347	canine	ส้มป่อย	Male	Miniature	12	Mass at gingiva	Malignant melanoma was highly suspected	>8years	Purebred
1313	2016	P5947281	59 B 77	canine	ข้าวปั้น		Mixed		Skin mass	Mast cell tumor, high grade		Mixed breed
1314	2016	P5946499	D16-0574	canine	จานสี	Male	Poodle	16	Skin mass at dorsal trunk	Trichoepitheliomas	>8years	Purebred
1315	2016	P5946034	D16-0423	canine	ลาเต้	Female	Golden Retriever	7	Mass at the eyelid	Malignant melanoma	≤8years	Purebred
1316	2016	P5302790	D16-0288	canine	บูม	Male	Mixed	4	Mass at the perianal area	Hepatoid gland adenoma	≤8years	Mixed breed
1317	2016	P5735657	59 B 127	canine	หนูจิ๋ว	Male	Miniature	15	Skin mass	Perianal gland adenoma		Purebred
1318	2016	P5519955	59 B120	canine	โมจิ	Male	Poodle	14	Skin mass	Sebaceous epithelioma		Purebred
1321	2017	P6003300	D17-2513	canine	สิงห์ดำ	Male	Mixed	4	Mass at mandible area	Malignant melanoma	≤8years	Mixed breed
1322	2017	P6005351	D17-1033	canine	หล้า	Female	Poodle	10	Mass at urinary bladder	Transitional cell carcinoma, papillary, non-infiltrating	>8years	Purebred
1323	2017	P6003340	D17-0563	canine	ขนุน	Male	Mixed	9	Mass at the oral cavity	Malignant melanoma	>8years	Mixed breed
1324	2017	P5518078	D17-1366	canine	โชกุน	Male	Golden Retriever	10	Mass in the ear canal	Histocytoma	>8years	Purebred
1325	2017	P5003161	D17-0427	canine	มิคกี้	Female	Mixed	12	Mass at the right ovary	Ovarian adenocarcinoma	>8years	Mixed breed
1326	2017	P6002456	D17-0168	canine	ลาเต้	Male	Mixed	14	Mass at the soft palate	Malignant malanoma	>8years	Mixed breed
1327	2017	P5951874	D17-0765	canine	คีเวล	Male	Shitzu	11	Mass at lower incisor	Acanthomatous ameloblastoma (acanthomatous epulis)	>8years	Purebred
1328	2017	P6000612	D17-1568	canine	ไบรท์	Male	Mixed	14	Mass at spleen and liver	Hepatocellular carcinoma with metastasis	>8years	Mixed breed
1329	2017	P5730834	D17-0329	canine	ฮังเล	Female	Mixed	12	Mass at spleen	Hemangioma	>8years	Mixed breed
1331	2017	P6005377	D17-1805	canine	เฮงเฮง	Male	Mixed	7	Mass at nasal cavity	Chondosarcoma	≤8years	Mixed breed
1332	2017	P6007845	D17-1872	canine	ลาภ	Male	Bangkaew	14	Mass at the dorsal part of tongue	Melignant melanoma	>8years	Purebred
1333	2017	P6008711	D17-2226	canine	สิงโต	Female	Mixed	12	Mass at supergingival area	Acanthomatous ameloblastoma (acanthomatous epulis)	>8years	Mixed breed
1334	2017	P6003401	D17-0713	canine	บราวนี่	Female	Shitzu	9	Mass at caudal lung lobe	Adenocarcinoma	>8years	Purebred
1335	2017	P6004270	D17-0750	canine	โกโก้	Male	Golden Retriever	5	Mass at the oral cavity	Fibrosarcoma	≤8years	Purebred
1336	2017	P6004547	D17-2712	canine	ข้าวเม่า	Male	Chihuahua	3	Mass at spleen	Lymphoma	≤8years	Purebred
1337	2017	P6006888	D17-1599	canine	จุ้นจ้าน	Male	Shitzu	11	Mass at left forelimb	Undifferentiated sarcoma	>8years	Purebred
1338	2017	P5308227	D17-3064	canine	ฟีโน่	Male	Mixed	10	Mass at the gingiva	Fibrosarcoma	>8years	Mixed breed
1339	2017	P6006135	D17-1268	Hamster	หมูอ้วน	Male		1	Mass at ear	Squamous cell carcinoma (SCC)	≤8years	Mixed breed
1340	2017	P6008368	D17-2103	Feline	บัวขาว	Male	Siamese	2	Mass at the right abdomen	Histocytic sarcoma	≤8years	Purebred
1341	2017	P6009434	D17-2507	Feline	มอมแมม	Female	DSH	1	Mass at right thoracic area	Fibroma	≤8years	Mixed breed
1342	2017	P6010256	D17-2740	Feline	แพรว	Female	DSH	8	Mass at the ear pinna	Squamous cell carcinoma (SCC)	≤8years	Mixed breed
1344	2017	P5733660	D17-3019	Feline	วุ๊นจุ่น	Male	DSH	2	Mass at nasal cavity	Fibroma	≤8years	Mixed breed
1345	2017	P6008366	D17-2085	canine	น้ำหวาน	Female	Shitzu	11	Mass at ventral part of neck	Canine eosinophillic granuloma	>8years	Purebred
1346	2017	P6002466	D17-0182	canine	Jalaw	Male	Mixed	16	Mass at oral cavity	Melignant melanoma	>8years	Mixed breed
1347	2017	P5902062	D17-0086	canine	ฮาร์ดดิสก์	Male	Poodle	12	Mass at oral cavity	Melignant melanoma	>8years	Purebred
1349	2017	P6005188	D17-1134	canine	ฮิปโป	Male	Dachshund	4	Mass at the hard palate	Melanoma	≤8years	Purebred
1350	2017	P6009724	D17-2992	Feline	Miruko	Female	DSH	11	Skin mass	Mass cell tumor	>8years	Mixed breed
1352	2017	P6008971	D17-2320	canine	ยักษ์	Male	Rottweiler	7	Mass in Bone	Osteosarcoma	≤8years	Purebred
1353	2017	P6007704	D17-1919	canine	บราวนี่	Male	Mixed	8	Mass at spleen	Lymphoma	≤8years	Mixed breed
1354	2017	P6004526	D17-0813	canine		Female	Pomeranian	15	Mass at vagina	Fibroma	>8years	Purebred
1355	2017	P6008639	D17-2192	canine	ขาว	Male	Mixed	8	Mass at testis	Sertoli cell tumor	≤8years	Mixed breed
1356	2017	P5302000	D17-2068	canine	คิตตี้	Female	Mixed	12	Mass at right lateral neck area	Sebaceous gland adenoma	>8years	Mixed breed
1357	2017	P6004255	D17-0782	canine	ลูฟี่	Male	Siberian Husky	12	Mass at testis	Seminoma	>8years	Purebred
1358	2017	P6003264	D17-0511	canine	บะหมี่	Male	Mixed	18	Mass at spleen	Hemangiosarcoma	>8years	Mixed breed
1359	2017	P5304368	D17-1345	canine	Maron	Female	Mixed	12	Mass at nasal cavity	Osteosarcoma	>8years	Mixed breed
1360	2017	P5838818	D17-0710	canine	คูก้า	Male	Mixed	18	Mass at oral	Fibroma	>8years	Mixed breed
1361	2017	P6005882	D17-1215	canine	สเปน	Female	Shitzu	6	Mass at stomach (Pyloric antrum)	Tubulopapillary adenoma	≤8years	Purebred
1362	2017	P6007603	D17-1810	canine	โชคดี	Female	Miniature	7	Mass at vagina	Fibroma	≤8years	Purebred
1363	2017	P5303267	D17-1871	canine	มีมี่	Female	Mixed	12	Mass at the right ear canal	Ceruminoud gland cacinoma	>8years	Mixed breed
1365	2017	P6011495	CHM350	canine	มดดำ	Female	Shitzu	9	Hepatic mass	Hepatocellular carcinoma	>8years	Purebred
1366	2017	P5910220029	CHM298	canine	เป๋าฮื้อ	Female	Pomeranian	9	Splenic mass	Hemangiosarcoma	>8years	Purebred
1367	2017	P6010972	CHM369	canine	ลักกี้	Male	Mixed	10	Testicular mass	Seminoma	>8years	Mixed breed
1368	2017	P6009077	D17-2347	canine	นีโม่	Male	Poodle	14	Mass at perianal area	Squamous cell carcinoma	>8years	Purebred
1371	2017	P6007714	D17-1859	canine	โบนัส	Male	Poodle	10	Mass at perianal area	Hepatoid gland carcinoma	>8years	Purebred
1372	2017	P6007496	D17-1833	canine	Mary	Female	Mixed	11	Skin mass (Ear)	Squamous cell carcinoma	>8years	Mixed breed
1373	2017	P6004521	D17-1857	canine	อั่งเปา	Female	Golden Retriever	12	Skin mass at thorax	Lipoma	>8years	Purebred
1375	2017	P5950172	D17-0353	Hedgehog	ไข่ตุ๋น	Female		3	Skin mass at neck	Lipoma	≤8years	Mixed breed
1376	2017	P6006867	D17-1509	canine	โมจิ	Female	Poodle	13	Mass at vagina	Leiomyosarcoma	>8years	Purebred
1377	2017	P6004856	D17-0899	canine	ดุ๊กดิ๊ก	Female	Mixed	13	Mass at urinary bladder	Transitional cell carcinoma	>8years	Mixed breed
1378	2017	P5896671	D17-0877	canine	ติงลี่	Male	Mixed	10	Mass at abdomen	Leiomyosarcoma	>8years	Mixed breed
1380	2017	P5306030	D17-0587	Feline	แดง	Male	DSH	11	Skin mass at face	Thichoepithelioma	>8years	Mixed breed
1381	2017	P60034037	D17-0553	Feline	สีนวล	Female	DSH	7	Skin mass	Fibrosarcoma	≤8years	Mixed breed
1383	2017	P6004585	D17-2278	canine	เปียกปูน	Male	Bangkaew	6	Liver mass	Hepatocellular carcinoma (Solid)	≤8years	Purebred
1384	2017	P6005249	D17-1469	Feline	Jesse	Male	Maine Coon	11	Mass at urinary bladder	Transitional Cell Carcinoma	>8years	Purebred
1385	2017	P6004704	D17-1132	Feline	ดำมี่	Male	DSH	7	Oral mass (median canthus)	Melanoma	≤8years	Mixed breed
1386	2017	P6008206	D17-2366	canine	ก๊องแก๊ง	Male	Shitzu	13	Oral mass (Mandible)	Malignant melanoma	>8years	Purebred
1387	2017	P6009130	D17-2741	canine	Lelo	Female	Mixed	10	Oral mass (Tounge)	Malignant melanoma	>8years	Mixed breed
1388	2017	P6010065	D17-2731	canine	Holly	Female	Mixed	13	Oral mass (Gingiva)	Malignant melanoma	>8years	Mixed breed
1389	2017	P6003222	D17-0458	Hamster	Hamster	Male		4 mo	Oral mass	Myxoma	≤8years	Mixed breed
1390	2017	P5949706	D17-1712	canine	ถ้วยฟู	Male	Shitzu	6	Oral mass (lower lip)	Malignant melanoma	≤8years	Purebred
1391	2017	P5516893	D17-0374	canine	มันนี่	Male	Shitzu	11	Oral mass	Amelanotic melanoma	>8years	Purebred
1392	2017	P5946491	D17-1976	canine	อัลมอนต์	Male	Shitzu	10	Mass at left ear	Plasmacytoma	>8years	Purebred
1393	2017	P6007721	D17-1832	canine	มารวย	Male	Mixed	15	Mass at left perianal area	Hepatoid gland carcinoma	>8years	Mixed breed
1394	2017	P6005296	D17-1935	canine	เฉาก๊วย	Female	Mixed	7	Mass at right Hindlimb	Hemangiopericytoma	≤8years	Mixed breed
1395	2017	P6009060	D17-2368	canine	ลีลา	Female	Mixed	8	Mass at neck	Hemangioma	≤8years	Mixed breed
1396	2017	P6008852	D17-2277	canine	ลักกี้	Male	Syberian	9	Mass at tail	Hepatoid gland carcinoma	>8years	Purebred
1397	2017	P5412042	D17-2304	canine	นุ่น	Female	Mixed	11	Mass at left forelimb	Mast cell tumor grade 2	>8years	Mixed breed
1398	2017	P5842910	D17-1191	canine	อั่งเปา	Male	Mixed	9	Mass at dorsal anus	Hepatoid gland adenoma	>8years	Mixed breed
1399	2017	P5300756	D17-0586	canine	โรตี	Female	Mixed	7	Mass at the eyelid	Squamous cell carcinoma	≤8years	Mixed breed
1400	2017	P6004183	D17-0715	canine	รถถัง	Female	Mixed	14	Mass at upper eyelid	Sebaceous gland adenoma	>8years	Mixed breed
1401	2017	P6002539	D17-0654	canine	เสงี่ยม	Male	Syberian	5	Mass at lower eyelid	Transmissible venereal tumor (TVT)	≤8years	Purebred
1402	2017	P5900787	D17-2141	canine	น้องแพนด้า	Female	Mixed	5	Mass at right Hindlimb	Fibroma	≤8years	Mixed breed
1404	2017	P5517855	D17-2476	canine	บัดดี้	Female	Golden Retriever	10	Mass at the right scapular area	Hemangiopericytoma (low grade)	>8years	Purebred
1405	2017	P5302681	D17-0543	canine	ฮิปโป	Female	Mixed	9	Mass at left abdomen	Lipoma	>8years	Mixed breed
1406	2017	P6002351	D17-0046	canine	โทน	Male	Cocker Spanial	10	Mass at left forelimb (elbow)	Hemangioma	>8years	Purebred
1407	2017	P6006903	D17-1534	canine	ซออู้	Male	Shitzu	6	Mass at tail	Squamous cell carcinoma	≤8years	Purebred
1410	2017	P6003554	D17-0602	canine	รถด่วน	Male	Spitz	17	Mass at perianal area	Hepatoid gland adenoma	>8years	Purebred
1411	2017	P5910100067	D17-2165	canine	เต๋ย	Female	Mixed	10	Skin mass	Mast cell tumor grade 2	>8years	Mixed breed
1412	2017	P5950149	D17-1424	canine	แพนด้า	Female	Mixed	13	Mass at lateral trunk	Lipoma	>8years	Mixed breed
1413	2017	P6006114	D17-1350	canine	หมูแดง	Female	Mixed	14	Mass at right tibia	Fibrosarcoma	>8years	Mixed breed
1414	2017	P6002857	D17-0318	canine	สุดหล่อ	Male	Cocker Spanial	9	Mass at left forelimb	Fibroma	>8years	Purebred
1415	2017	P5304800	D17-1455	canine	ไจแอ้น	Male	Mixed	9	Mass at the ventral thoracic	Lipoma	>8years	Mixed breed
1418	2017	P6009407	D17-2540	canine	หมี	Male	Rottweiler	13	Mass at sublumbar	Histiocytic sarcoma	>8years	Purebred
1419	2017	P6010784	D17-2978	canine	บาชี	Female	Mixed	9	Mass at right axillary area	Fibroma	>8years	Mixed breed
1422	2017	P6003607	D17-0751	canine	ลัก	Female	Mixed	8	Skin mass at back	Lipoma	≤8years	Mixed breed
1423	2017	P6006509	D17-1471	canine	โอเลี้ยง	Male	Mixed	15	Mass at ventral thorax	Hemangiopericytoma	>8years	Mixed breed
1424	2017	P5300321	D17-0040	canine	Gypsy	Female	Labrador Retriever	9	Mass at left elbow	Mast cell tumor was highly suspected	>8years	Purebred
1425	2017	P6002340	D17-0087	canine	โอวัลติน	Male	Mixed	13	Mass at scrotal sac	Mast cell tumor grade 2	>8years	Mixed breed
1427	2017	P6003648	D17-0940	canine	ซาลาเปา	Male	Golden Retriever	13	Skin mass	Cutaneous histiocytoma	>8years	Purebred
1428	2017	P6006734	D17-1694	canine	ดุ๊กดิ๊ก	Female	Mixed	8	Skin mass at right tarsal joint	Mast cell tumor grade 2	≤8years	Mixed breed
1429	2017	P6003431	D17-0604	canine	ลักกี้	Male	Labrador Retriever	3	Mass at ventral thoracic area	Lipoma	≤8years	Purebred
1430	2017	P6004247	D17-0798	canine	ร่ำรวย	Male	Shitzu	13	Mass at prepuce	Hepatoid gland adenoma	>8years	Purebred
1431	2017	P5300136	D17-0382	canine	ทอง	Male	Mixed	10	Mass at right axillary area	Hemangioma	>8years	Mixed breed
1432	2017	P6006388	D17-1413	canine	ซีซ่า	Female	Golden Retriever	10	Skin mass at abdomen	Lipoma	>8years	Purebred
1433	2017	P6005702	D17-1349	canine	มอคค่า	Male	Shitzu	7	Mass at anus	Hepatoid gland carcinoma	≤8years	Purebred
1434	2017	P6005315	D17-1075	canine	นวล	Female	Mixed	13	Mass at perianal area	Hemangiopericytoma	>8years	Mixed breed
1435	2017	P6002546	D17-0226	canine	น้องปูด	Female	Mixed	45 days	Mass at skull	Peripheral nerve sheath tumor	≤8years	Mixed breed
1436	2017	P5900645	D17-1347	canine	ยาหยี	Female	Pug	10	Mass at right phalangx	Squamous cell carcinoma	>8years	Purebred
1437	2017	P5901824	D17-0634	canine	เฟื่องฟ้า	Female	Mixed	8	Skin mass at lumbar	Trichoepithelioma with cyst	≤8years	Mixed breed
1438	2017	P6006065	D17-1934	canine	ฟ้าใส	Female	Mixed	10	Skin mass	Mast cell tumor grade 2	>8years	Mixed breed
1440	2017	P5902122	D17-2189	canine	แอปเปิ้ล	Female	Poodle	10	Mass at abdomen	Hemangiosarcoma	>8years	Purebred
1442	2017	P6009322	D17-3020	canine	ฟี	Male	Siberian Husky	9	Mass at left axillary	Lipoma	>8years	Purebred
1443	2017	P6010762	D17-3031	canine	บุญศรี	Male	Labrador Retriever	9	Mass at left thoracic	Mast cell tumor grade 2	>8years	Purebred
1444	2017	P6006276	D17-2845	canine	ออมทรัพย์	Female	Shitzu	9	Mass at the left perianal area	Hepatoid gland carcinoma	>8years	Purebred
1445	2017	P6008255	D17-2067	canine	หนามเตย	Female	Labrador Retriever	11	Mass at left forelimb	Osteosarcoma	>8years	Purebred
1446	2017	P6004182	D17-0834	canine	ปุ๊บปั๊บ	Male	Chihuahua	7	Mass at kidney	Renal adenocarcinoma	≤8years	Purebred
1447	2017	P5900027	D17-0709	canine	ที่รัก	Male	Chihuahua	8	Oral mass	Malignant melanoma	≤8years	Purebred
1449	2017	P6005291	D17-1192	canine	Jack	Male	Rottweiler	5	Mass at the gingiva	Fibromatous epulis	≤8years	Purebred
1450	2017	P5901898	D17-2604	canine	มะลิ	Female	Mixed	9	Mass at urinary bladder	Transitional cell carcinoma, papillary infiltrative type	>8years	Mixed breed
1453	2017	P6008628	D17-2188	canine	โกโก้	Male	Poodle	14	Mass at testis	Seminoma	>8years	Purebred
1454	2018	P6115679	D18-0961	canine	เเบคแฮม	Male	Poodle	16	Mass at prostate gland	Urothelial cell carcinoma	>8years	Purebred
1455	2018	P6116892	D18-1346	canine	แดง	Female	Mixed	4	Oral mass	Squamous papilloma	≤8years	Mixed breed
1456	2018	P6116665	D18-1302	canine	ทิกกี้	Female	Mixed	10	Skin mass	Mast cell tumor , low grade	>8years	Mixed breed
1457	2018	P5951417	CHM293	canine	ตุ้ยตุ้ย	Male	Shitzu	15	Nasal mass	Papillary nasal adenocarcinoma	>8years	Purebred
1458	2018	P6011114	CHM341	canine	ซูกัส	Female	Mixed	7	Skin mass	Mast cell tumor , low grade	≤8years	Mixed breed
1459	2018	P6121509	CHM511	canine	ออดี้	Female	Poodle	4	Skin mass	Mast cell tumor , low grade	≤8years	Purebred
1460	2018	P6119768	CHM522	canine	Copter	Male	Golden Retriever	5	Penile mass	Squamous papilloma	≤8years	Purebred
1461	2018	P6121224	CHM501	canine	กันดั้ม	Male	Bangkaew		Mass at skin	Inverteed papilloma		Purebred
1462	2018	P6121750	CHM39	canine	Rascal	Male	Boston-terrier	7	Mass at skin	Sebaceous adenocarcinoma	≤8years	Purebred
1463	2018	P6112689	CHM027	canine	เฉาก๊วย		Mixed	7	Mass at skin	Papillary adenocarcinoma of apocrine gland	≤8years	Mixed breed
1464	2018	P6012126	CHM002	canine	สำลี	Female	Mixed	9	Mass at vagina	Leiomyoma	>8years	Mixed breed
1465	2018	P5910100033	CHM076	canine	โกโก้	Male	Mixed	10	Nasal mass	Nasal adenocarcinoma	>8years	Mixed breed
1466	2018	P6117738	CHM58	canine	ฮ่องเต้	Male	Mixed	10	Subcutaneous mass	Lipoma	>8years	Mixed breed
1467	2018	P6121634	CHM64	canine	อเดล	Female	Mixed	2	Subcutaneous mass	Liposarcoma	≤8years	Mixed breed
1468	2018	P6112964	CHM053	canine	กุ๊กกิ๊ก	Female	Mixed	10	Skin mass	Mast cell tumor , low grade	>8years	Mixed breed
1469	2018	P6112355	CHM041	canine	วูฟ	Male	Siberian Husky	10	Mass at ear	Papillary Cystic adenoma of ceruminous gland	>8years	Purebred
1470	2018	P5521843	CHM104	canine	ม่อน	Male	Mixed	10	Skin mass	Perianal gland adenoma	>8years	Mixed breed
1471	2018	P6113711	CHM103	Feline	ธันวา	Female	DSH	2	Nasal mass	Squamous cell carcinoma		Mixed breed
1472	2018	P6114259	CHM127	canine	บูบู้	Male	Mixed	10	Right ulna	Multlobulated Osteochondromatosis	>8years	Mixed breed
1474	2018	P6008398	CHM143	canine	กระปุก	Female	Poodle	6	Skin mass	Cavernous hemangioma	≤8years	Purebred
1475	2018	P6011326	CHM146	canine	วีโก้	Male	Mixed		Skin mass	Perianal adenoma		Mixed breed
1476	2018	P6114622	CHM181	canine	ชินจัง	Male	Shitzu		Skin mass	Perianal gland adenoma		Purebred
1477	2018	P6115234	CHM169	canine	โซดา	Male	Shitzu	8	Skin mass	Perianal gland adenoma	≤8years	Purebred
1478	2018	P6115977	CHM213	canine	ข้าวตู	Female	Mixed	3	Subcutaneous mass	Lipoma	≤8years	Mixed breed
1479	2018	P6113752	CHM215	canine	แบคแฮม	Male	Golden Retriever	7	Skin mass	Mast cell tumor , high grade	≤8years	Purebred
1480	2018	P6116215	CHM202	canine	แองเจิ้ล	Female	Golden Retriever	12	Skin mass	Fibrosarcoma	>8years	Purebred
1481	2018	P6112781	CHM196	canine	พอลล่า	Female	Mixed	13	Skin mass	Mast cell tumor, low grade	>8years	Mixed breed
1482	2018	P6116165	CHM197	canine	Mild red	Female	Mixed		Skin mass	Mast cell tumor, low grade		Mixed breed
1483	2018	P6116086	CHM242	Feline	มีมี่	Female	Persian	7	Uterus	Leiomyoma	≤8years	Purebred
1484	2018	P6117329	CHM288	canine	บ๊อบบี้	Male	Mixed	1	Skin mass	Sebaceous epithelioma	≤8years	Mixed breed
1485	2018	P6115944	CHM294	Feline	ลายโต้เต้	Female	DSH		Skin mass	Fibroma		Mixed breed
1486	2018	P6117642	CHM309	Feline	เด่น	Female	DSH	5	Subcutaneous mass	Fibrosarcoma	≤8years	Mixed breed
1487	2018	P6117778	CHM319	canine	คิคุชิโอ๊ะ	Male	American Bully	7 mo	Skin mass	Mast cell tumor, high grade	≤8years	Purebred
1488	2018	P6117643	CHM316	Feline	ห้าแต้ม	Female	DSH	12	Skin mass	Fibrosarcoma	>8years	Mixed breed
1489	2018	P6116802	CHM340	Feline	มะลิ	Female	DSH		Oral mass	Squamous cell carcinoma		Mixed breed
1490	2018	P6113682	CHM396	canine	ดอลล่า	Female	Golden Retriever	11	Skin mass	Squamous cell carcinoma	>8years	Purebred
1491	2018	P6119778	CHM423	canine	ลูกชิ้น	Male	Mixed	7	Skin mass	Extragenital Canine Transmissible Venereal Tumor	≤8years	Mixed breed
1493	2018	P5900524	CHM388	canine	ไฮเตอร์	Male	Mixed	10	Testicular mass	Seminoma	>8years	Mixed breed
1494	2018	P6118500	CHM359	canine	ปังปอนด์	Male	Poodle	14	Skin mass	Squamous papilloma	>8years	Purebred
1495	2018	P5307783	CHM370	canine	น้องเล็ก	Male	Shitzu	10	Skin mass	Sebaceous epithelioma	>8years	Purebred
1496	2018	P6119735	CHM416	canine	แวนด้า	Female	Shitzu	8	Vaginal mass	Vaginal fibroma	≤8years	Purebred
1497	2018	P6120391	CHM446	canine	ไข่เจียว		Mixed		Skin mass	Mast cell tumor, low grade		Mixed breed
1498	2018	P5521211	CHM454	canine	ไอรอน		Mixed		Skin mass	Squamous cell carcinoma		Mixed breed
1499	2018	P6120121	CHM431	canine	ชาพีช	Female	Beagle	5	Skin mass	Cavernous hemangioma	≤8years	Purebred
1500	2018	P5302098	CHM486	canine	Locker	Male	Labrador Retriever	15	Skin mass	Basal cell carcinoma	>8years	Purebred
1501	2018	P6121236	CHM489	canine	Duxty	Male	Mixed	6 mo	Popliteal lymph node	Follicular lymphoma, low grade	≤8years	Mixed breed
1502	2018	P6121304	CHM492	canine	หมูหวาน	Female	Golden Retriever	8	Skin mass	Benign peripheral nerve sheath tumor	≤8years	Purebred
1503	2018	P6121197	CHM497	canine	สิงห์	Male	Mixed	9	Skin mass	Squamous cell carcinoma, well differentiated type	>8years	Mixed breed
1504	2018	P5305957	CHM498	canine	พุตตาล	Male	Labrador Retriever	9	Skin mass	Dermatofibroma	>8years	Purebred
1505	2018	P6120857	CHM471	canine	บ๊อบบี้	Female	Mixed		Subcutaneous mass	Mast cell tumor		Mixed breed
1507	2018	P6121551	CHM520	canine	ปีโป้	Male	Golden Retriever	7	Soft palate mass	Benign peripheral nerve sheath tumor	≤8years	Purebred
1508	2018	P5949735	CHM499	canine	บอล	Male	Mixed	11	Subcutaneous mass	Lipoma	>8years	Mixed breed
1509	2018	P6121076	CHM477	Feline	เหมียวเหมียว	Female	DSH	2	Nasal mass	Osteosarcoma	≤8years	Mixed breed
1510	2018	P6120909	BKK473	Feline	เป่าเปา	Female	DSH	11	Skin mass	Pilomatricoma	>8years	Mixed breed
1511	2018	P6113068	D18-1198	canine	รถถัง	Male	French bulldog	5	Mass at scrotal sac	Mast cell tumor, low grade	≤8years	Purebred
1512	2018	P6116420	D18-1217	canine	หยวน	Female	Shitzu	10	Subcutaneous mass	Infiltrative lipoma	>8years	Purebred
1513	2018	P6116485	D18-1218	canine	บีบี้	Male	Shitzu	14	Mass at face	Sebacous epithelioma	>8years	Purebred
1514	2018	P5812219	D18-1221	canine	หมูยอ	Female	Poodle	14	Mass in nasal cavity	Chondroma	>8years	Purebred
1515	2018	P6116121	D18-1093	Feline	คิตตี้	Female	DSH	2	Thoracic mass	Lymphoma	≤8years	Mixed breed
1517	2018	P5910080023	D18-0865	canine	กาแรม	Male	Shitzu	11	Mass at perianal area	Hepatoid gland epithelioma	>8years	Purebred
1518	2018	P6115436	D18-0881	canine	จุ้งเอ๋	Female	Pomeranian	10	Vaginal mass	Leiomyoma	>8years	Purebred
1519	2018	P6114580	D18-0904	canine	Mu Mu	Male	Golden Retriever	15	Mass at lumbar area	Pilomatricoma	>8years	Purebred
1520	2018	P6003627	D18-0933	canine	พัตเตอร์	Male	Golden Retriever	8	Mass at rostral mandible	Ossifying fibroma	≤8years	Purebred
1521	2018	P5301967	D18-0988	canine	ดุ๊กดิ๊ก	Male	Beagle	14	Mass at right pinna	Cutaneous histiocytoma	>8years	Purebred
1522	2018	P5305132	D18-0992	canine	โอวัลติน	Male	Mixed	17	Mass at testis	Seminoma	>8years	Mixed breed
1524	2018	P6115300	D18-1024	canine	ข้าวตู	Female	Pomeranian	9	Mass at larynx	Plasmacytoma	>8years	Purebred
1525	2018	P6115830	D18-1026	canine	โกโก้	Male	American Pitbull Terrier	8	Mass at peri-penis area	Mast cell tumor grade 2	≤8years	Purebred
1526	2018	P6115891	D18-1027	canine	ชิโร่	Male	Mixed	5	Mass in abdominal cavity	Epitheloid mesothelioma (Solid subtype)	≤8years	Mixed breed
1527	2018	P6116515	D18-1231	canine	เหยิน	Male	Mixed	11	Nasal mass	Transitional cell carcinoma	>8years	Mixed breed
1528	2018	P5950889	D18-1112	canine	แมม	Female	Mixed	9	Ovarian mass	Granulosa cell tumors	>8years	Mixed breed
1529	2018	P6116249	D18-1134	canine	หมูปิ้ง	Male	Mixed	4	Mass at prepuce and lymph node	Mast cell tumor high grade with metastasis	≤8years	Mixed breed
1530	2018	P6012037	D18-1135	canine	คานิ	Female	Golden Retriever	10	Oral mass	Melanocytoma	>8years	Purebred
1531	2018	P5409560	D18-1136	canine	Lucky	Male	Golden Retriever	9	Skin mass at dorsal trunk	Mast cell tumor high grade	>8years	Purebred
1532	2018	P6011499	D18-1246	canine	รอนนิน	Female	Labrador Retriever	11	Skin mass	Sebaceous epithelioma	>8years	Purebred
1533	2018	P5900347	D18-1249	canine	มีมี่	Male	Yorkshire Terrier	11	Mass at tongue	Amelanotic melanoma	>8years	Purebred
1535	2018	P6118307	D18-1928	canine	ท้าวทอง	Female	Mixed	10	Skin mass	Lipoma	>8years	Mixed breed
1536	2018	P5302915	D18-1930	canine	ซูโม่	Female	Mixed	10	Mass at lateral forelimb	Peripheral nerve sheath tumor	>8years	Mixed breed
1537	2018	P6007447	D18-1956	canine	Luna	Female	Shitzu	2	Ovarian mass	Ovarian adenoma	≤8years	Purebred
1538	2018	P6118045	D18-1995	canine	Rocky	Male	Mixed	6	Nasal mass	Squamous cell carcinoma	≤8years	Mixed breed
1539	2018	P6118396	D18-1996	canine	เรนาด	Male	Mixed	5	Mass at sublingual area	Rhabdomyoma	≤8years	Mixed breed
1540	2018	P6118639	D18-2082	canine	อองอิน	Male	Siberian Husky	6	Skin mass at pelvic	Fibroma	≤8years	Purebred
1541	2018	P6118765	D18-2136	canine	เคย์	Male	Bangkaew	12	Mass at perianal area	Hepatoid gland epithelioma	>8years	Purebred
1542	2018	P6118641	D18-2137	canine	ละออน	Female	Mixed	10	Mass at urinary bladder	Leiomyoma	>8years	Mixed breed
1543	2018	P6117746	D18-1712	canine	เจ้ค	Male	Labrador Retriever	8	Oral mass	Melanocytoma	≤8years	Purebred
1544	2018	P5302198	D18-1753	canine	ทองหยอด	Male	Mixed	10	Oral mass	Amelanoblastoma	>8years	Mixed breed
1545	2018	P6117773	D18-1765	canine	Yoyo	Female	Mixed	5	Nasal mass	Malignant melanoma	≤8years	Mixed breed
1546	2018	P6117764	D18-1768	canine	ไอซ์	Male	Shitzu	11	Mass at ear	Ceruminous gland adenocarcinoma	>8years	Purebred
1547	2018	P6118021	D18-1821	canine	ดาด้า	Female	Mixed	10	Mass at left forelimb	Squamous cell carcinoma	>8years	Mixed breed
1548	2018	P6114460	D18-1822	canine	ทอง	Female	Mixed	10	Mass at vulva	Mast cell tumor	>8years	Mixed breed
1549	2018	P6117169	D18-1532	canine	ข้าวสวย	Female	Golden Retriever	5	Mass at dorsal trunk	Hemangiosarcoma	≤8years	Purebred
1550	2018	P6005475	D18-1533	canine	แจ๊กกี้	Female	Golden Retriever	13	Mass at neck	Follicular lymphoma	>8years	Purebred
1551	2018	P6116356	D18-1562	canine	สแปโร่	Male	American Pitbull Terrier	9	Mass at prepuce	Hemangiosarcoma	>8years	Purebred
1552	2018	P6112936	D18-1646	canine	ขนมปัง	Female	Pug	8	Skin mass	Mast cell tumor, low grade	≤8years	Purebred
1553	2018	P6119281	D18-2480	canine	ลักกี้	Male	Mixed	14	Oral mass	Malignant melanoma	>8years	Mixed breed
1554	2018	P6119593	D18-2507	canine	สตางค์	Female	Pomeranian	8	Mass at left forelimb	Trichoepithelioma	≤8years	Purebred
1555	2018	P6117333	D18-2508	canine	ช็อคกี้	Female	Labrador Retriever	11	Mass at thoracic area	Peripheral nerve sheath tumor	>8years	Purebred
1556	2018	P6119592	D18-2509	canine	จิงเกอเบล	Female	Chihuahua	2	Subcutaneous mass	Lipoma	≤8years	Purebred
1558	2018	P6118772	D18-2183	canine	ไข่ตุ๋น	Male	Mixed	13	Skin mass	Basal cell carcinoma	>8years	Mixed breed
1559	2018	P6118921	D18-2185	canine	ลิ้นจี่	Male	Mixed	6	Mass at neck	Squamous cell carcinoma	≤8years	Mixed breed
1561	2018	P6118951	D18-2230	canine	สาลี่	Female	Pug	6	Skin mass at anus	Amelanotic melanoma	≤8years	Purebred
1563	2018	P6119080	D18-2274	canine	Sita	Female	Schnauzer	15	Mass at right buccal area	Oral malignant melanoma	>8years	Purebred
1564	2018	P6118782	D18-2303	canine	หนุน	Female	Mixed	6	Mass at vagina	Transmissible venereal tumors	≤8years	Mixed breed
1565	2018	P6119040	D18-2308	canine	น้องดำ	Female	Mixed	8	Mass at axillary area	Mast cell tumor, high grade	≤8years	Mixed breed
1566	2018	P6117183	D18-2332	canine	หมั่นโถ	Male	Spitz	10	Subcutaneous mass at axillary	Lipoma	>8years	Purebred
1567	2018	P5307757	D18-2340	canine	เบอร์ดี้	Male	Mixed	10	Mass at axillary area	lipoma	>8years	Mixed breed
1569	2018	P6773547	D18-2389	canine	ซูซิ	Female	Shitzu	8	Mass at vagina	Transmissible venereal tumors	≤8years	Purebred
1570	2018	P6119201	D18-2435	canine	โบ๊ท	Male	Shitzu	9	Oral mass	Seminoma	>8years	Purebred
1571	2018	P6120929	D18-3008	canine	Lucky	Male	Golden Retriever	11	Skin mass	Malignant melanoma	>8years	Purebred
1572	2018	P6120647	D18-3024	canine	สมหวัง	Male	Mixed	6	Mass at neck	Basal cell carcinoma	≤8years	Mixed breed
1573	2018	P6120707	D18-3025	canine	สาวสวย	Female	Mixed	16	Mass at right cheek	Melanocytoma	>8years	Mixed breed
1574	2018	P6113997	D18-2658	canine	กาก้า	Female	Syberian	8	Mass at vagina	Leiomyoma	≤8years	Purebred
1577	2018	P6118287	D18-2623	canine	ไมโล	Male	Mixed	10	Mass at perianal area	Hepatoid gland adenoma	>8years	Mixed breed
1578	2018	P6119320	D18-3166	canine	น้ำตาล	Male	Siberian Husky	10	Mass at preputeal area	Peripheral nerve sheath tumor	>8years	Purebred
1579	2018	P6121567	D18-3211	canine	ดุกดิก	Male	Mixed	8	Mass at penis	Transmissible venereal tumors	≤8years	Mixed breed
1580	2018	P6116349	D18-3023	Feline	มารวย	Male	Persian	1	Skin mass	Lymphoma	≤8years	Purebred
1581	2018	P6121204	D18-3110	Feline	ป๊อกกี้	Female	DSH	4	Ovarian mass	Granulosa cell tumors	≤8years	Mixed breed
1582	2018	P6115099	D18-3067	canine	นิปปอน	Male	French bulldog	6	Mass at testis	Sertoli cell tumor	≤8years	Purebred
1583	2018	P6121175	D18-3068	Feline	โคล่า	Male	DSH	4	Mass at thoracic area	Peripheral nerve sheath tumor	≤8years	Mixed breed
1584	2018	P6120299	D18-2835	canine	มูก้า	Male	French bulldog	7	Mass at intestine	Cholangiocarcinoma	≤8years	Purebred
1585	2018	P6121292	D18-3167	canine	ปาล์มมี่	Female	Golden Retriever	10	Skin mass	Lipoma	>8years	Purebred
1588	2018	P6121538	D18-3229	canine	กาละแม	Male	Miniature	9	Mass at lateral forelimb	Mast cell tumor	>8years	Purebred
1589	2018	P6114227	D18-1173	canine	ข้าวกล่ำ	Female	Mixed	8	Subcutaneous mass	Lipoma	≤8years	Mixed breed
1590	2018	P6118603	D18-2027	canine	ท๊อฟฟี่	Female	Shitzu	10		Squamous cell carcinoma	>8years	Purebred
1592	2018	P6012191	D18-0086	canine	โมจิ	Female	Poodle	13	Mass at gingival	Plasma cell tumor	>8years	Purebred
1593	2018	P6112627	D18-0108	canine	ถ้วยทอง	Male	Shitzu	13	Mass at perianal area	Hepatoid gland epithelioma	>8years	Purebred
1594	2018	P6112344	D18-0109	canine	จิงโจ้	Female	Mixed	13	Oral mass	Squamous cell carcinoma	>8years	Mixed breed
1595	2018	P6112621	D18-0110	canine	เฟอร์รารี่	Female	Golden Retriever	13	Mass at thoracic area	Basosquamous cell carcinoma	>8years	Purebred
1596	2018	P6112706	D18-0153	canine	เฟี้ยว	Male	Mixed	13	Mass at cervical area	Sebaceous gland epithelioma	>8years	Mixed breed
1598	2018	P5410706	D18-0156	canine	สายฟ้า	Male	Shitzu	6	Mass at testis	Seminoma	≤8years	Purebred
1599	2018	P5302262	D18-0697	canine	มิชา	Female	Bangkaew	8	Skin mass at thorax	Mast cell tumor grade 2	≤8years	Purebred
1601	2018	P6114028	D18-0543	canine	ดุ๊กดิ๊ก	Female	Mixed	10	Mass at left thorax	Mast cell tumor grade 2	>8years	Mixed breed
1602	2018	P6011487	D18-0544	canine	เฉาก๊วย	Male	Cocker Spanial	16	Mass at prepuce	Hepatoid gland epithelioma	>8years	Purebred
1604	2018	P6112813	D18-0262	canine	น้องนาย	Female	Mixed		Mass at shoulder	Mast cell tumor grade 2		Mixed breed
1606	2018	P6003169	D18-0278	canine	ฟิโน่	Female	Golden Retriever	9	Skin mass	Lipoma	>8years	Purebred
1607	2018	P6113176	D18-0337	canine	ดุ๊กดิ๊ก	Female	Poodle	7	Mass at lefe paw	Sebaceous gland adenoma	≤8years	Purebred
1608	2018	P5410223	D18-0339	canine	ทองม้วน	Male	Mixed	14	Skin mass	Lipoma	>8years	Mixed breed
1609	2018	P6113387	D18-0355	canine	บ่อกี้	Male	Mixed	12	Skin mass	Mast cell tumor grade 2	>8years	Mixed breed
1614	2018	P5346491	D18-0629	canine	อัลมอน	Female	Shitzu	10	Mass at ear	Histiocytoma	>8years	Purebred
1615	2018	P6114312	D18-0677	canine	แป๊ะกัง	Male	Mixed	9	Mass at anus	Hepatoid gland carcinoma	>8years	Mixed breed
1616	2018	P6115907	D18-1058	canine	จ๋อแจ๋	Female	Mixed	12	Skin mass at forelimb	Infiltrative lipoma	>8years	Mixed breed
1617	2018	P6011005	D18-0746	canine	ปุยฝ้าย	Male	Mixed	20	Anal mass	Hepatoid gland epithelioma	>8years	Mixed breed
1618	2018	P6114757	D18-0772	canine	จิ๋ว	Female	Mixed	10	Skin mass at head	Mast cell tumor grade 2	>8years	Mixed breed
1619	2018	P6007218	D18-0856	canine	Dui Dui	Female	Golden Retriever	4	Skin mass at ventral thoracic	Infiltrative lipoma	≤8years	Purebred
1620	2018	P6115794	D18-1157	canine	บ๊อก	Male	Mixed	9	Mass at penis	Transmissible venereal tumors	>8years	Mixed breed
1621	2018	P6116137	CHM206	canine	อู่ฟู่	Female	Mixed	15	Nasal mass	Squamous cell carcinoma	>8years	Mixed breed
1623	2018	P6117397	D18-1874	canine	คุโระ	Male	Mixed	14	Mass at abdomen	Mast cell tumor, low grade	>8years	Mixed breed
1624	2019	P6010418	D19-1534	canine	บราวนี่	Female	Mixed	12	Mass at rectum	Neuroendocrine tumor	>8years	Mixed breed
1625	2019	P6222145	D19-0163	Feline	เป๊ปซี่	Male	DSH	6	Mass at facial area	Complex and mixed apocrine carcinoma	≤8years	Mixed breed
1626	2019	P6224601	D19-1102	canine	BB	Male	Chihuahua	10	Mass at lateral trunk	Mast cell tumor, low grade	>8years	Purebred
1627	2019	P6224317	D19-1080	canine	พี่สาม	Female	Mixed	9	Mass at right axillary area	Mast cell tumor, low grade	>8years	Mixed breed
1628	2019	P6222768	D19-1187	canine	หนูแดง	Female	Mixed	10	Mass at thoracic area	Lipoma	>8years	Mixed breed
1629	2019	P6223777	D19-0791	canine	โมเซ่	Male	Bull terrier	12	Skin mass	Squamous cell carcinoma	>8years	Purebred
1630	2019	P6223989	D19-0868	canine	ปุ๊กกี้	Female	Poodle	10	Mass at right lumbar area	Infiltrative lipoma	>8years	Purebred
1631	2019	P6010177	D19-0924	canine	คุ้กกี้	Female	Mixed	15	Mass at right pinna	Sebaceous epithelioma	>8years	Mixed breed
1632	2019	P6117300	D19-0962	canine	เชียงใหม่	Male	Siberian Husky	12	Mass at perianal area	Hepatoid gland carcinoma	>8years	Purebred
1633	2019	P6223744	D19-0727	canine	น้อยหน่า	Male	Poodle	14	Mass at right forelimb	Liposarcoma	>8years	Purebred
1634	2019	P6226702	D19-1972	canine	จัมโบ้	Female	Golden Retriever	12	Spleen	Hemagiosarcoma	>8years	Purebred
1635	2019	P6011111	D19-2074	canine	ป๊อป	Male	Mixed	11	Mass at hindlimb	Mast cell tumor, high grade	>8years	Mixed breed
1636	2019	P6225783	D19-2077	canine	ไมค์	Male	Mixed	2	Mass at thoracic area	Chondroblastic osteosarcoma	≤8years	Mixed breed
1637	2019	P6225591	D19-2085	canine	Taya	Female	Mixed	13	Oral mass	Fibrosarcoma	>8years	Mixed breed
1638	2019	P6225772	D19-1707	canine	น้ำบุศย์	Female	Thai Ridgeback	12	Skin mass at hindlimb	Mast cell tumor, low grade	>8years	Purebred
1639	2019	P6225732	D19-1602	canine	สีนวล	Male	Labrador Retriever	10	Nasal mass	Fibrosarcoma	>8years	Purebred
1640	2019	P6010970	D19-2310	canine	นินจา	Male	Mixed	10	Skin mass	Histiocytoma	>8years	Mixed breed
1641	2019	P6226570	D19-2155	Feline	ส้มหล่น	Female	DSH	16	Nasal mass	Squamous cell carcinoma	>8years	Mixed breed
1642	2019	P5306839	D19-2235	canine	นมชง	Male	Mixed	9	Mass at inguinal area	Lipoma	>8years	Mixed breed
1643	2019	P610050047	CHM421	canine	น้องหมี	Male	Mixed	10	Nasal mass	Nasal papillary adenocarcinomma	>8years	Mixed breed
1644	2019	P6009266	D19-2161	canine	อ้วน	Female	Mixed	5	Left Popliteal Lymph node	Lymphoma	≤8years	Mixed breed
1645	2019	P6227664	D19-2435	canine	โชเล่ย์	Male	Poodle	14	Mass at testis	Seminoma	>8years	Purebred
1646	2019	P6222080	D19-2183	canine	สิงโต	Male	Mixed	8	Nasal mass	Osteosarcoma	≤8years	Mixed breed
1647	2019	P6227303	D19-2198	canine	อ้อนแอ้น	Female	Labrador Retriever	12	Skin mass at hindlimb	Infiltrative lipoma	>8years	Purebred
1648	2019	P6227371	D19-2255	canine	เฉาก๊วย	Female	Mixed	12	Oral mass	Melanoma	>8years	Mixed breed
1649	2019	P6223487	D19-2182	canine	ดอลลาร์	Male	Shitzu	3	Mass at perianal area	Hepatoid gland adenoma	≤8years	Purebred
1650	2019	P6227573	D19-2353	canine	บับเบิ้ล	Male	Mixed	8	Mass at lateral trunk	Mast cell tumor, high grade	≤8years	Mixed breed
1651	2019	P6227459	D19-2312	canine	ลูกหยี	Female	Mixed	11	Subcutaneous mass at thoracic	Lipoma	>8years	Mixed breed
1652	2019	P5306351	D19-1858	canine	น้ำฝน	Female	Chihuahua	13	Skin mass	Mast cell tumor, low grade	>8years	Purebred
1653	2019	P5520570	D19-0094	canine	หมีอ้วน	Female	Labrador Retriever	5	Skin mass	Peripheral nerve sheath tumor	≤8years	Purebred
1654	2019	P5301790	D19-0097	canine	Blink	Female	Mixed	10	Subcutaneous mass at trunk	Infiltrative lipoma	>8years	Mixed breed
1655	2019	P6008440	D19-2160	canine	ถุงทอง	Male	Mixed	8	Mass at tail	Pleomorphic sarcoma	≤8years	Mixed breed
1657	2019	P6224480	D19-1185	canine	ตุ๊กดิ๊ก	Male	Mixed	8	Oral mass	Amelanotic melanoma	≤8years	Mixed breed
1658	2019	P6121698	D19-0178	canine	ข้าวตู	Male	Yorkshire Terrier	14	Oral mass	Oral melanoma	>8years	Purebred
1659	2019	P6223355	D19-0684	canine	หนอน	Male	Mixed	12	Oral mass	Squamous cell carcinoma	>8years	Mixed breed
1660	2019	P6223667	D19-0721	canine	แพนด้า	Female	Bull terrier	12	Nasal mass	Acanthomatous ameloblastoma	>8years	Purebred
1661	2019	P6115627	D19-0717	canine	น้ำผึ้ง	Female	Pomeranian	12	Oral mass	Malignant melanoma	>8years	Purebred
1663	2019	P6222261	D19-0315	canine	น้องหมี	Male	Mixed	9	Oral mass	Malignant melanoma	>8years	Mixed breed
1664	2019	P6221981	D19-0045	canine	เปียกปูน	Female	Mixed	12	Skin mass	Hemagioma	>8years	Mixed breed
1666	2019	P6222430	D19-0237	canine	Olive	Female	Mixed	1	Nasal mass	Transmissible veneral tumors	≤8years	Mixed breed
1667	2019	P6222911	CHM78	canine	บราวน์		Shitzu	15	Mass at testis	Seminoma	>8years	Purebred
1668	2019	P6222301	D19-0312	canine	ทุนด้า	Male	Mixed	12	Vaginal mass	Fibrosarcoma	>8years	Mixed breed
1669	2019	P6224616	D19-1100	canine	โอเลี้ยง	Female	Mixed	14	Vaginal mass	Leiomyoma	>8years	Mixed breed
1671	2019	P6224176	D19-0926	canine	มายา	Female	Siberian Husky	11	Mass at hindlimb	Hemangiosarcoma	>8years	Purebred
1672	2019	P6223395	D19-0886	canine	เดฟฟี่	Male	Mixed	7	Mass at testis	Seminoma and sertoli cell tumor	≤8years	Mixed breed
1673	2019	P6224301	D19-1471	canine	แซมโบ้	Male	Mixed	6	Oral mass	Mucoepidermal carcinoma	≤8years	Mixed breed
1674	2019	P6222363	D19-0585	canine		Male	Miniature	14	Oral mass	Oral melanoma	>8years	Purebred
1675	2019	P6225560	D19-1454	canine	ชาเย็น	Male	Poodle	16	Mass at testis	Seminoma	>8years	Purebred
1676	2019	P6223101	D19-0674	canine	มารวย	Male	Mixed	8	Mass at upper eyelid	Meibomian adenoma	≤8years	Mixed breed
1677	2019	P5303171	D19-0859	canine	Dina	Female	Mixed	10	Mass at heat base	Chemodectoma	>8years	Mixed breed
1678	2019	P6225035	D19-1350	canine	ตาล	Female	Mixed	10	Skin mass	Cutaneous hemangiosarcoma	>8years	Mixed breed
1679	2019	P5518851	D19-1105	canine	ซัมซุง	Male	Poodle	13	Skin mass	Trichoblastoma	>8years	Purebred
1680	2019	P6113069	D19-1351	canine	รักบี้	Male	Golden Retriever	12	Mass at forelimb	Melanoma	>8years	Purebred
1682	2019	P5900912	D19-1419	canine	น้องหนู	Female	Mixed	9	Subcutaneous mass	Lipoma	>8years	Mixed breed
1683	2019	P6224475	D19-1062	canine	โกโก้	Male	Mixed	12	Skin mass	Mast cell tumor, low grade	>8years	Mixed breed
1684	2019	P6224437	D19-0989	canine	บราวนี่	Male	Shitzu	13	Skin mass	Tricholemmoma	>8years	Purebred
1685	2019	P5412488	D19-0688	canine	โดเรมี	Female	Golden Retriever	8	Mass at left eye	Trichoblastoma	≤8years	Purebred
1686	2019	P6223381	CHM117	canine	โก	Male	Golden Retriever	13	Skin mass	Malignant amelanotic melanoma	>8years	Purebred
1687	2019	P5734571	D19-0096	canine	หมากี้	Female	Mixed	9	Skin mass	Mast cell tumors	>8years	Mixed breed
1688	2019	P6222543	D19-0273	canine	Rufus	Male	Mixed	6	Mass at eyelid	Melanoma	≤8years	Mixed breed
1690	2019	P6222552	D19-0377	canine	ทองหยอด	Male	Mixed	7	Mass at forelimb	Cutaneous histiocytoma	≤8years	Mixed breed
1692	2019	P6117144	D19-1841	canine	สุขกี้	Male	Bangkaew	13	Skin mass	Mast cell tumor , high grade	>8years	Purebred
1693	2019	P6226598	D19-1876	canine	แซนดี้	Female	Mixed	15	Skin mass	Cutaneous malignant melanoma	>8years	Mixed breed
1694	2019	P6225718	D19-1549	canine	ก๊วยเจ๋ง	Male	Bangkaew	15	Oral mass	Mast cell tumor, low grade	>8years	Purebred
1695	2019	P5842052	D19-1878	canine	นิก	Male	Mixed	12	Mass at thoracic area	Mast cell tumor, high grade	>8years	Mixed breed
1696	2019	P5522249	D19-1533	canine	ปันปัน	Male	Shitzu	12	Mass at lip	Cutaneous histiocytoma	>8years	Purebred
1697	2019	P6120830	D19-1898	canine	โอชิ	Male	Poodle	11	Skin mass at neck	Basosquamous carcinoma	>8years	Purebred
1698	2019	P6221828	D19-0177	canine	มิ	Male	Mixed		Mass at hindlimb	Mast cell tumor, high grade		Mixed breed
1699	2019	P6119163	CHM47	canine	ถุงทอง	Male	Mixed	7	Skin mass	Dermatofibroma	≤8years	Mixed breed
1701	2019	P6226858	CHM439	Feline	กาฟิว	Female	Persian	10	Skin mass	Squamous cell carcinoma	>8years	Purebred
1702	2019	P5518302	CHM93	Feline	Gucci	Male	DSH		Skin mass	Mast cell tumor, low grade		Mixed breed
1703	2019	P6118981	CHM422	canine	บรูโน่	Male	Mixed	11	Mass at eyelid	Cutaneous hemangioma	>8years	Mixed breed
1704	2019	P6225652	CHM266	canine	แพนด้า	Female	Mixed	11	Vaginal mass	Fibroma	>8years	Mixed breed
1705	2019	P6225478	CHM248	canine	ไมโล	Female	Shitzu	7	Mass at testis	Sertoli cell tumor	≤8years	Purebred
1707	2019	P5623310	CHM243	canine	เต้าหู้	Male	Mixed	9	Oral mass	Acanthomatous epulis	>8years	Mixed breed
1708	2019	P6224438	CHM315	canine	Malteser	Male	Poodle		Oral mass	Acanthomatous epulis		Purebred
1709	2019	P6121547	CHM5	canine	กุ๊ชชี่	Female	Shitzu	11	Colo-rectal mass	Superficial colon carcinoma	>8years	Purebred
1710	2019	P6121397	CHM6	canine	ด๊อกแด๊ก	Female	Mixed	9	Skin mass	Fibrosarcoma	>8years	Mixed breed
1711	2019	P6224108	CHM286	canine	ชิวชิว	Male	Shitzu	15	Skin mass	Perianal adenoma	>8years	Purebred
1712	2019	P5301959	CHM279	canine	การ์ชง1	Male	Mixed	9	Skin mass	In situ squamous cell carcinoma	>8years	Mixed breed
1713	2019	P6225644	CHM253	canine	คุ้กกี้	Male	Shitzu	10	Skin mass	Ceruminous adenoma and squamous papilloma	>8years	Purebred
1714	2019	P6225265	CHM237	canine	ชิกกี้	Male	Mixed		Subcutaneous mass	Lipoma		Mixed breed
1715	2019	P6225820	CHM289	canine	ช็อคโกแลต	Male	Mixed	10	Subcutaneous mass	Lipoma	>8years	Mixed breed
1716	2019	P5900294	CHM210	canine	โอโม่	Male	Mixed	9	Oral mass	Squamous cell carcinoma, poorly differentiated type and osteossarcoma	>8years	Mixed breed
1717	2019	P6115345	CHM206	canine	ก๊วยเจ๋ง	Male	Mixed	6	Ocular mass	Extragenital Canine Transmissible Venereal Tumor	≤8years	Mixed breed
1718	2019	P6225970	CHM308	canine	ปุ๊กปิ๊ก	Female	Mixed	7	Subcutaneous mass	Cutaneous hemangiopericytoma	≤8years	Mixed breed
1719	2019	P6002571	CHM339	canine	แคบหมู	Female	Mixed	7	Skin mass	Malignant cutaneous histiocytoma	≤8years	Mixed breed
1720	2019	P6225593	CHM325	canine	แฮรี่	Male	Shitzu	14	Skin mass	Perianal adenoma	>8years	Purebred
1721	2019	P6223378	CHM307	canine	ทอมมี่	Male	Golden Retriever	10	Skin mass	Perianal adenoma	>8years	Purebred
1723	2019	P6225980	CHM295	canine	มะเหมี่ยว	Female	Mixed	7	Skin mass	Sebaceous epithelioma and adenoma	≤8years	Mixed breed
1724	2019	P6226040	CHM300	canine	ฮันนี่	Female	Golden Retriever	7	Skin mass	Trichoblastoma	≤8years	Purebred
1725	2019	P6222390	CHM51	canine	ยับโร	Female	Mixed	6	Skin mass	Mast cell tumor, high grade	≤8years	Mixed breed
1726	2019	P6011182	CHM105	canine	ของหวาน	Female	Mixed	10	Skin mass	Mast cell tumor, high grade	>8years	Mixed breed
1727	2019	P6223553	CHM123	canine	นมจืด	Male	Mixed	15	Skin mass	Mast cell tumor, low grade	>8years	Mixed breed
1728	2019	P6283818	CHM133	canine	กาหลง	Female	Mixed	8	Skin mass	Mast cell tumor, low grade	≤8years	Mixed breed
1729	2019	P6003628	CHM2	canine	แพดดี้	Female	Golden Retriever	8	Skin mass	Squamous cell carcinoma, well differentiated type	≤8years	Purebred
1730	2019	P6224003	CHM200	canine	Maeby	Female	Beagle	8	Skin mass	Trichoblastoma	≤8years	Purebred
1731	2019	P6120427	CHM186	canine	ไข่ปิ้ง	Male	Chihuahua		Skin mass	Perianal adenoma		Purebred
1732	2019	P6223178	CHM96	canine	ชาบู	Male	Mixed	6	Testicular mass	Seminoma	≤8years	Mixed breed
1733	2019	P6222285	CHM50	canine	ชาโต้	Male	Mixed	4	Testicular mass	Sertoli cell tumor	≤8years	Mixed breed
1734	2019	P6222947	CHM130	canine	ฟาโรห์	Male	Mixed	10 mo	Capal bone mass	Osteochondroma	≤8years	Mixed breed
1735	2019	P6223825	CHM187	canine	ศรีนวล	Female	Mixed	5	Vaginal mass	Canine Transmissible Venereal Tumor	≤8years	Mixed breed
1736	2019	P6120308	CHM212	canine	โมจิ	Female	Mixed		Vaginal mass	Leiomyoma		Mixed breed
1737	2019	P6222714	CHM145	canine	เฮงเฮง	Male	Mixed	10	Testicular mass	Seminoma	>8years	Mixed breed
1738	2019	P6224802	CHM197	Feline	ฟีฟ่า	Female	DSH	1	Nasal mass	Nasal adenocarcinoma	≤8years	Mixed breed
1739	2019	P6224881	CHM198	canine	หน่อมแน่ม	Female	Poodle	10	Vaginal mass	Vaginal polyp and fibroma	>8years	Purebred
1740	2019	P5625830	CHM124	canine	ถุงทอง	Male	Shitzu	16	Oral mass	Malignant amelanotic melanoma	>8years	Purebred
1741	2019	P6223245	D19-0548	canine	ลูลู่	Female	Mixed	9	Skin mass	Cutaneous histiocytoma	>8years	Mixed breed
1742	2019	P6003625	D19-0723	canine	แบมบู	Male	Mixed	9	Subcutaneous mass	Lipoma	>8years	Mixed breed
1743	2019	P6223152	D19-0520	Hedgehog	แคระ	Male		4	Skin mass	Squamous cell carcinoma	≤8years	Mixed breed
1744	2019	P6224615	D19-1103	canine	แจส	Male	Mixed	6	Mass at left cheek	Trichoblastoma, ribbon type	≤8years	Mixed breed
1745	2019	P6224074	D19-1140	canine	เจ๋ง	Male	Mixed	7	Mass at rectum	Hepatoid gland adenoma	≤8years	Mixed breed
1746	2019	P6224767	D19-1141	canine	ปุ๊กกี้	Female	Poodle	12	Vaginal mass	Infiltrative lipoma	>8years	Purebred
1747	2019	P6011552	D19-0570	canine	บุญรอด	Male	Pomeranian	4	Mass at urinary bladder	Transitional cell carcinoma	≤8years	Purebred

## Sheet: Privot all data
Location	(ทั้งหมด)
Animal	Feline
ป้ายชื่อแถว	นับจำนวน ของ Name
Adenocarcinoma	3
Adenocarcinoma metastasis	1
Adenoma	1
Amelanotic melanoma	1
Anaplastic histiocytic sarcoma	1
Apocrine gland carcinoma	1
Calcified uterine leiomyoma	1
Comedocarcinoma	1
Complex and mixed apocrine carcinoma	1
Cribiform carcinoma	1
Cystadenocarcinoma	1
Feline cutaneous mast cell tumor	1
Feline primary ocular sarcoma (Post-traumatic sarcoma)	1
Fibroma	3
Fibromatous epulis	1
Fibrosarcoma	9
Fibrosarcoma associated with multinucleated giant cell infiltration	1
Granulosa cell tumors	1
Histocytic sarcoma	1
Intraductal papillary adenoma	1
Leiomyoma	2
Lymphoma	2
Malignant melanoma	1
Malignant mixed tumor	1
Mammary gland adenoma	1
Mammary gland cystadenoma	1
Mass cell tumor	1
Mast cell tumor, low grade	1
melanoma	1
Melanoma (ballooning type) with osteoblastic dysplasia	1
Melanoma with epidermal ulceration was highly suspected	1
Mesothelioma (Epitheloid)	1
Mixed apocrine carcinoma	1
Nasal adenocarcinoma	1
Osifying fibroma	1
Osteosarcoma	2
Osteosarcoma, MCT	1
Peripheral nerve sheath tumor	1
Pilomatricoma	1
Simple adenoma	2
Simple carcinoma	1
Simple carcinoma ( Tubulopapillary type)	1
Simple carcinoma (Solid carcinoma)	1
Simple carcinoma (Solid type)	1
Simple carcinoma (tubular type)	2
Simple carcinoma (tubulopapillary type)	2
Simple carcinoma(Solid type)	1
Simple carcinoma(Tubulopapillary type)	1
Simple mammary carcinoma (Tubular type)	2
Simple papillary adenoma	1
Simple tubular adenocarcinoma, grade 2	1
Simple tubular carcinoam grade 2	1
Simple tubulo-papillary adenocarcinoma	1
Solid carcinoma	3
Solid mammary gland carcinoma	1
Solid-cystic apocrine edenoma	1
Squamous cell carcinoma	8
Squamous cell carcinoma (SCC)	1
Squamous cell carcinoma was highly suspected	1
Thichoepithelioma	1
Transitional cell carcinoma	2
Tubular carcinoma	1
Tubulopapillary carcinoma	6
ผลรวมทั้งหมด	97

## Sheet: all data of biopsies
No	Year	ID	Lab ID	Animal	Name	Sex	Breed	Age	Location	Classification	Age catagorized	Breed catagorized
1	2012	P5517934	D12-375	canine	จินนี่	Female	Shitzu	9	Mass at mammary gland	Simple carcinoma (Solid type)	>8years	Purebred
2	2012	P5517872	D12-392	canine	นิล	Female	Mixed	4	Mass at mammary gland	Simple carcinoma (Anaplastic type)	≤8years	Mixed breed
3	2012	P5517901	D12-376	canine	อุ้ยอ้าย	Female	Poodle	11	Mass at mammary gland	Simple carcinoma (Solid type)	>8years	Purebred
4	2012	P5517625	D12-339	canine	Snow white	Female	Poodle	9	Mass at mammary gland	Tubulopapillary carcinoma	>8years	Purebred
5	2012	P5410965	D12-309	canine	ซินดี้	Female	Dalmecian	13	Mass at mammary gland	Tubulopapillary carcinoma	>8years	Purebred
6	2012	P5517515	D12-268	canine	ตัวเล็ก	Female	Poodle	8	Mass at mammary gland	Simple carcinoma (Anaplastic type)	≤8years	Purebred
7	2012	P5517627	D12-281	canine	เจนนี่	Female	Poodle	10	Mass at mammary gland	Solid carcinoma	>8years	Purebred
8	2012	P5517230	D12-233	canine	มอมเเมม	Female	Mixed	10	Mass at mammary gland	Complex tubular adenocarcinoma	>8years	Mixed breed
9	2012	P5517123	D12-234	canine	ดุ๊กดิ๊ก	Female	Shitzu	10	Mass at mammary gland	Malignant mixed tumor	>8years	Purebred
10	2012	P5517136	D12-199	canine	ถุงทอง	Female	Mixed	9	Mass at mammary gland	Complex carcinoma	>8years	Mixed breed
11	2012	P5516612	D12-065	canine	เชอร์รี่	Female	Poodle	11	Mass at mammary gland	Complex carcinoma	>8years	Purebred
12	2012	P5517038	D12-181	canine	ข้าวโพด	Female	Mixed	8	Mass at mammary gland	Malignant mixed tumor	≤8years	Mixed breed
13	2012	P5516553	D12-066	canine	ไอติม	Female	Mixed	12	Mass at mammary gland	Tubulopapillary carcinoma	>8years	Mixed breed
14	2012	P5516970	D12-156	canine	เบิร์ดเดย์	Female	Mixed	8	Mass at mammary gland	Malignant mixed tumor	≤8years	Mixed breed
15	2012	P5516978	D12-157	canine	เลี่ยม	Female	Mixed	10	Mass at mammary gland	Tubulopapillary carcinoma	>8years	Mixed breed
16	2012	P5516931	D12-153	canine	ซาร่า	Female	Mixed	6	Mass at mammary gland	Solid carcinoma	≤8years	Mixed breed
17	2012	P5516547	D12-046	canine	เคา	Female	Mixed	15	Mass at mammary gland	Solid carcinoma	>8years	Mixed breed
18	2012	P5413065	D12-025	canine	มีมี่	Female	Mixed	14	Mass at mammary gland	Solid carcinoma	>8years	Mixed breed
19	2012	P5413186	D12-047	canine	เฉาก๊วย	Female	Mixed	5	Mass at mammary gland	Complex solid carcinoma	≤8years	Mixed breed
20	2012	P5416295	D12-016	canine	มอมเเมม	Female	Mixed	17	Mass at mammary gland	Solid carcinoma	>8years	Mixed breed
21	2012	P5519574	D12-776	canine	พองโก้	Female	Poodle	15	Mass at mammary gland	Simple carcinoma (Anaplastic type)	>8years	Purebred
22	2012	P5519667	D12-812	canine	เเอนนา	Female	Cocker	8	Mass at mammary gland	Simple carcinoma (Solid type)	≤8years	Purebred
23	2012	P5519346	D12-747	canine	เเบงค์	Male	Mixed	7	Mass at mammary gland	Simple carcinoma (Anaplastic type)	≤8years	Mixed breed
24	2012	P5519306	D12-710	canine	ซูกัส	Female	Poodle	8	Mass at mammary gland	Malignant mixed tumor	≤8years	Purebred
25	2012	P5519326	D12-694	canine	พุดดิ้ง	Female	Mixed	12	Mass at mammary gland	Tubulopapillary carcinoma	>8years	Mixed breed
26	2012	P5519189	D12-680	canine	โรบิน	Female	Miniature	8	Mass at mammary gland	Solid carcinoma	≤8years	Purebred
27	2012	P5518864	D12-610	canine	นิกกี้	Male	Mixed	5	Mass at mammary gland	Benign mixed tumor	≤8years	Mixed breed
28	2012	P5519144	D12-652	canine	ข้าวจ้าว	Female	Cocker	8	Mass at mammary gland	Solid carcinoma	≤8years	Purebred
29	2012	P5518267	D12-506	canine	เเบมเเบม	Female	Poodle	7	Mass at mammary gland	Mucinous carcinoma	≤8years	Purebred
30	2012	P5306803	D12-484	canine	ยุ่ง	Female	Mixed	7	Mass at mammary gland	Complex carcinoma	≤8years	Mixed breed
31	2012	P5518228	D12-446	canine	กีวี่	Female	Poodle	10	Mass at mammary gland	Complex carcinoma	>8years	Purebred
32	2012	P5518232	D12-445	canine	ขี้มูก	Female	Rottweiler	7	Mass at mammary gland	Simple carcinoma (Anaplastic type)	≤8years	Purebred
33	2012	P5518124	D12-420	canine	แบล็ก	Female	Miniature	10	Mass at mammary gland	Malignant mixed tumor	>8years	Purebred
34	2012	P5522778	D12-1644	canine	ไข่เจียว	Female	Mixed	9	Mass at mammary gland	Tubulopapillary carcinoma	>8years	Mixed breed
35	2012	P5521271	D12-1567	canine	โบโบ้	Female	Mixed	8	Mass at mammary gland	Malignant mixed tumor	≤8years	Mixed breed
36	2012	P5522253	D12-1510	canine	ชีต้า	Female	Mixed	9	Mass at mammary gland	Tubulopapillary carcinoma	>8years	Mixed breed
37	2012	P5521848	D12-1441	canine	ข้าวนึ่ง	Female	Mixed	10	Mass at mammary gland	Adenosis with infiltrating carcinoma	>8years	Mixed breed
38	2012	P5522233	D12-1506	canine	โคล่า	Female	Mixed	10	Mass at mammary gland	Malignant mixed tumor	>8years	Mixed breed
39	2012	P5521474	D12-1438	Feline	เเต้ม	Female	DSH	8	Mass at mammary gland	Solid carcinoma	≤8years	Mixed breed
40	2012	P5412640	D12-1199	Feline	สามสี	Female	DSH	10	Mass at mammary gland	Simple carcinoma (Solid carcinoma)	>8years	Mixed breed
41	2012	P5521271	D12-1290	canine	โบโบ้	Female	Mixed	8	Mass at mammary gland	Tubulopapillary carcinoma	≤8years	Mixed breed
42	2011	P5516460	D12-026	canine	บี้	Female	Mixed	10	Mass at mammary gland	Malignant mixed tumor	>8years	Mixed breed
43	2012	P5521253	D12-1246	Feline	เหมียว	Female	DSH	12	Mass at mammary gland	Tubulopapillary carcinoma	>8years	Mixed breed
44	2012	P5521278	D12-1247	canine	เด็ก	Female	Mixed	12	Mass at mammary gland	Benign mixed mammary gland tumor	>8years	Mixed breed
45	2012	P5301473	D12-1226	canine	ดุ๊กดิ๊ก	Female	Miniature	10	Mass at mammary gland	Simple carcinoma (Solid carcinoma)	>8years	Purebred
46	2012	P5521114	D12-1201	canine	ท๊อฟฟี่	Female	Poodle	7	Mass at mammary gland	Malignant mixed tumor	≤8years	Purebred
47	2012	P5518164	D12-1117	canine	เหมียวๆ	Female	Mixed	8	Mass at mammary gland	Simple carcinoma (Anaplastic type)	≤8years	Mixed breed
48	2012	P5521023	D12-1154	canine	หมี	Female	Mixed	12	Mass at mammary gland	Simple carcinoma (Anaplastic type)	>8years	Mixed breed
49	2012	P5307582	D12-1000	Feline	Maxi	Female	DSH	16	Mass at mammary gland	Tubulopapillary carcinoma	>8years	Mixed breed
50	2012	P5520956	D12-1130	canine	น้องพลอยสวย	Female	Mixed	7	Mass at mammary gland	Mammary gland cystadenoma	≤8years	Mixed breed
51	2012	P5520868	D12-1132	canine	สอง	Female	Mixed	5	Mass at mammary gland	Carcinosarcoma	≤8years	Mixed breed
52	2012	P5520933	D12-1133	canine	ดิ๋ง	Female	Mixed	11	Mass at mammary gland	Simple carcinoma (Anaplastic type)	>8years	Mixed breed
53	2012	P5518878	D12-1131	canine	แอนนี่	Female	GR	10	Mass at mammary gland	Malignant mixed mammary gland	>8years	Purebred
54	2012	P5520505	D12-1007	canine	Pixxy	Female	Bangkaew	10	Mass at mammary gland	Tubulopapillary carcinoma	>8years	Purebred
55	2012	P5520453	D12-989	canine	พอลลี่	Female	GR	9	Mass at mammary gland	Fibrosarcoma	>8years	Purebred
56	2012	P5518018	D12-905	canine	เตี้ย	Female	Mixed	6	Mass at mammary gland	Tubulopapillary carcinoma	≤8years	Mixed breed
57	2012	P5520187	D12-947	canine	สตางค์	Female	mixed	10	Mass at mammary gland	Tubulopapillary carcinoma	>8years	Mixed breed
58	2013	p5628715	D13-1674	canine	ลีออง	Female	Beagle	5	Mass at mammary gland	Mammary gland adenoma	≤8years	Purebred
59	2013	P5628531	D13-1622	canine	นางปุย	Female	Mixed	9	Mass at mammary gland	Simple carcinoma	>8years	Mixed breed
60	2013	P5300536	D13-2665	canine	ฟาราห์	Female	Poodle	16	Mass at mammary gland	Simple carcinoma (Solid carcinoma)	>8years	Purebred
61	2013	P5302009	D13-1688	canine	นิต้า	Female	Poodle	10	Mass at mammary gland	Malignant mixed tumor	>8years	Purebred
62	2013	P5627854	D13-1437	canine	มีมี่	Female	mixed	9	Mass at mammary gland	Malignant mixed tumor	>8years	Mixed breed
63	2013	P5628240	D13-1501	Feline	ไพลิน	Female	DSH	9	Mass at mammary gland	Simple carcinoma (Solid type)	>8years	Mixed breed
64	2013	P5625578	D13-1755	canine	ปุยฝ้าย	Female	Poodle	10	Mass at mammary gland	Simple carcinoma (Tubulopapillary carcinoma)	>8years	Purebred
65	2013	P5623477	D13-117	canine	เหมย	Female	Mixed	10	Mass at mammary gland	Tubulopapillary carcinoma	>8years	Mixed breed
66	2013	P5623459	D13-158	canine	บิวตี้	Female	mixed	9	Mass at mammary gland	Low-cellularity fibroadenoma	>8years	Mixed breed
67	2013	P5518659	D13-157	canine	มิมิ	Female	Poodle	11	Mass at mammary gland	complex carcinoma	>8years	Purebred
68	2013	P5520216	D13-185	canine	เยลลี่	Female	GR	10	Mass at mammary gland	malignant mixed mammary glant tumor	>8years	Purebred
69	2013	P5623728	D13-193	Feline	ตัวเล็ก	Female	DSH	11	Mass at mammary gland	Tubulopapillary carcinoma	>8years	Mixed breed
70	2013	P5627591	D13-1359	canine	ชมพู่	Female	Poodle	13	Mass at mammary gland	Tubulopapillary carcinoma	>8years	Purebred
71	2013	P5628409	D13-1598	canine	ดุ๊กดิ๊ก	Female	mixed	15	Mass at mammary gland	Simple carcinoma (Solid type)	>8years	Mixed breed
72	2013	P5625399	D13-650	canine	ยู่ยี่	Female	mixed	12	Mass at mammary gland	Solid carcinoma	>8years	Mixed breed
73	2013	P5519797	D13-536	canine	บะหมี่	Female	mixed	10	Mass at mammary gland	Solid carcinoma	>8years	Mixed breed
74	2013	P5625458	D13-695	canine	ชิบิ	Female	mixed	4	Mass at mammary gland	Mucinous adenocarcinoma	≤8years	Mixed breed
75	2013	P5625395	D13-693	canine	ตะนอย	Female	Pekingese	11	Mass at mammary gland	complex carcinoma	>8years	Purebred
76	2013	P5625366	D13-709	canine	เเจม	Female	Mixed	4	Mass at mammary gland	Simple carcinoma (Solid carcinoma)	≤8years	Mixed breed
77	2013	P5624960	D13-545	canine	จุ้นจ้าน	Female	mixed	10	Mass at mammary gland	complex carcinoma	>8years	Mixed breed
78	2013	P5625459	D13-696	canine	กาแฟ	Female	mixed	5	Mass at mammary gland	Simple carcinoma (Anaplastic type)	≤8years	Mixed breed
79	2013	P5522620	D13-001	canine	จิ๋ว	Female	mixed	7	Mass at mammary gland	Mixed mammary gland tumor	≤8years	Mixed breed
80	2013	P5302289	D13-015	canine	สตัง	Female	mixed	15	Mass at mammary gland	Anaplastic carcinoma	>8years	Mixed breed
81	2013	P5623391	D13-091	canine	กล้วยไข่	Female	mixed	10	Mass at mammary gland	Solid carcinoma	>8years	Mixed breed
82	2013	P5623238	D13-055	canine	ลำดวน	Female	Cocker	9	Mass at mammary gland	Mixed mammary gland tumor	>8years	Purebred
83	2013	P5623445	D13-113	canine	เข็มทอง	Female	mixed	10	Mass at mammary gland	Fibrosarcoma	>8years	Mixed breed
84	2013	P5623354	D13-077	canine	นิล	Female	mixed	10	Mass at mammary gland	Anaplastic carcinoma	>8years	Mixed breed
85	2013	P5626380	D13-991	canine	ปีโป้	Female	mixed	10	Mass at mammary gland	complex carcinoma	>8years	Mixed breed
86	2013	P5626331	D13-957	canine	โอรีโอ้	Female	LR	9	Mass at mammary gland	Tubulopapillary carcinoma	>8years	Purebred
87	2013	P5623995	D13-1037	canine	สีสวาท	Female	Chihuahua	14	Mass at mammary gland	complex carcinoma	>8years	Purebred
88	2013	P5626793	D13-1095	canine	น้องใหม่	Female	mixed	6	Mass at mammary gland	Simple carcinoma	≤8years	Mixed breed
89	2013	P5626236	D13-927	canine	ไวท์	Female	mixed	6	Mass at mammary gland	Malignant mixed tumor	≤8years	Mixed breed
90	2013	P5626830	D13-1122	canine	จูเนียร์	Female	Poodle	8	Mass at mammary gland	Malignant mixed tumor	≤8years	Purebred
91	2013	P5626895	D13-1132	canine	เอมมิลี	Female	Beagle	8	Mass at mammary gland	Mammary gland adenocarcinoma	≤8years	Purebred
92	2013	P5626925	D13-1133	canine	เลน	Female	Mixed	14	Mass at mammary gland	fibrosarcoma	>8years	Mixed breed
93	2013	P5624378	D13-368	canine	ขี้เหร่	Female	Mixed	10	Mass at mammary gland	Mixed mammary gland tumor	>8years	Mixed breed
94	2013	P5624442	D13-412	canine	สดใส	Female	pug	7	Mass at mammary gland	Tubulopapillary carcinoma	≤8years	Purebred
95	2013	P5624245	D13-318	canine	ซินดี้	Female	mixed	11	Mass at mammary gland	complex carcinoma	>8years	Mixed breed
96	2013	P5624724	D13-487	canine	จีน่า	Female	Poodle	10	Mass at mammary gland	Tubulopapillary carcinoma	>8years	Purebred
97	2013	P5410982	D13-416	canine	ฟักทอง	Female	shitzu	11	Mass at mammary gland	Squamous cell metaplasia of mammary gland	>8years	Purebred
98	2013	P5410609	D13-574	Feline	แตงโม	Female	DSH	13	Mass at mammary gland	Solid carcinoma	>8years	Mixed breed
99	2013	P5624992	D13-552	canine	เนเน่	Female	Poodle	9	Mass at mammary gland	malignant mixed mammary glant tumor	>8years	Purebred
100	2013	P5412732	D13-546	canine	จ๊อบเเจ๊บ	Female	Poodle	9	Mass at mammary gland	Tubulopapillary carcinoma	>8years	Purebred
101	2013	P5410759	D13-601	canine	บีโธเฟ่น	Female	mixed	13	Mass at mammary gland	complex carcinoma	>8years	Mixed breed
102	2013	P5303103	D13-474	canine	เเดง	Female	mixed	13	Mass at mammary gland	Solid carcinoma	>8years	Mixed breed
103	2013	P5628409	D13-1598	canine	ดุ๊กดิ๊ก	Female	mixed	15	Mass at mammary gland	Simple carcinoma (Solid type)	>8years	Mixed breed
104	2013	P5627914	D13-1406	canine	โอเลี้ยง	Female	Poodle	7	Mass at mammary gland	Benign mixed tumor	≤8years	Purebred
105	2013	P5626055	D13-850	canine	จิ่งหง	Female	Poodle	10	Mass at mammary gland	Solid carcinoma (Complex type)	>8years	Purebred
106	2013	P5626002	D13-845	canine	จุ๊บจิ๊บ	Female	mixed	8	Mass at mammary gland	Tubulopapillary carcinoma	≤8years	Mixed breed
107	2013	P5625264	D13-751	canine	ลำไย	Female	Poodle	16	Mass at mammary gland	Simple carcinoma (Solid carcinoma)	>8years	Purebred
108	2013	P5626066	D13-860	canine	หมูหยอง	Female	Poodle	10	Mass at mammary gland	Osteosarcoma	>8years	Purebred
109	2013	P5626068	D13-857	canine	ตูมตาม	Female	mixed	9	Mass at mammary gland	Simple carcinoma (Anaplastic type)	>8years	Mixed breed
110	2013	P5625743	D13-783	canine	โอโม่	Female	mixed	10	Mass at mammary gland	Squamous cell carcinoma	>8years	Mixed breed
111	2013	P5627112	D13-1195	Feline	เเม้ว	Female	DSH	8	Mass at mammary gland	Tubulopapillary carcinoma	≤8years	Mixed breed
112	2013	P5307245	D13-1202	canine	เจี้ยว	Female	mixed	10	Mass at mammary gland	Malignant mixed tumor	>8years	Mixed breed
113	2013	P5623445	D13-1249	canine	เข็มทอง	Female	mixed	10	Mass at mammary gland	Simple carcinoma (Anaplastic type)	>8years	Mixed breed
114	2013	P5627214	D13-1227	canine	เจสซี่	Female	GR	11	Mass at mammary gland	Tubulopapillary carcinoma	>8years	Purebred
115	2013	P5522111	D13-1199	canine	ลักกี้	Female	LR	4	Mass at mammary gland	Benign mixed tumor	≤8years	Purebred
116	2013	P5628065	D13-1453	canine	Donut	Female	mixed	14	Mass at mammary gland	Simple carcinoma (Anaplastic type)	>8years	Mixed breed
117	2013	P5627222	D13-1264	canine	อองฟอง	Female	Poodle	16	Mass at mammary gland	Simple carcinoma (Anaplastic type)	>8years	Purebred
118	2013	P5627309	D13-1265	canine	เพชร	Male	mixed	11	Mass at mammary gland	Simple carcinoma (Anaplastic type)	>8years	Mixed breed
119	2013	P5628284	D13-1525	Feline	เเจ๊กการิน	Female	DSH	6	Mass at mammary gland	Tubulopapillary carcinoma	≤8years	Mixed breed
120	2013	P5628052	D13-1486	canine	น้ำหวาน	Female	mixed	6	Mass at mammary gland	complex carcinoma	≤8years	Mixed breed
121	2013	P5625411	D13-1456	canine	น้ำตาล	Female	mixed	10	Mass at mammary gland	Tubulopapillary carcinoma	>8years	Mixed breed
122	2013	P5627976	D13-1440	canine	หนูเล็ก	Female	Poodle	9	Mass at mammary gland	Cystadenocarcinoma	>8years	Purebred
123	2013	P5627980	D13-1438	canine	ขนุน	Female	GR	7	Mass at mammary gland	Cystadenocarcinoma	≤8years	Purebred
124	2013	P5517531	D13-1475	canine	สีหมอก	Female	GR	10	Mass at mammary gland	complex carcinoma	>8years	Purebred
125	2013	P5414249	D13-1487	canine	ลาล่า	Female	LR	11	Mass at mammary gland	Simple carcinoma (Anaplastic type)	>8years	Purebred
126	2013	P5627734	D13-1354	canine	แฟนต้า	Female	Mixed	10	Mass at mammary gland	complex carcinoma	>8years	Mixed breed
127	2013	P5517531	D13-1475	canine	สีหมอก	Female	GR	10	Mass at mammary gland	complex carcinoma	>8years	Purebred
128	2013	P5414249	D13-1487	canine	ลาล่า	Female	LR	11	Mass at mammary gland	Simple carcinoma (Anaplastic type)	>8years	Purebred
129	2013	P5627734	D13-1354	canine	แฟนต้า	Female	Mixed	10	Mass at mammary gland	complex carcinoma	>8years	Mixed breed
130	2014	P5521003	D14-065	canine	โฟกัส	Female	mixed	15	Mass at mammary gland	Simple carcinoma (Anaplastic type) with sclerosis	>8years	Mixed breed
131	2014	P5628284	D14-070	Feline	เเจ๊กการิน	Female	DSH	7	Mass at mammary gland	Tubulopapillary carcinoma	≤8years	Mixed breed
132	2014	P5729620	D14-127	canine	ฟิว	Female	Mixed	10	Mass at mammary gland	Simple carcinoma(Tubulopapillary type)	>8years	Mixed breed
133	2014	P5305422	D14-159	canine	ฟอร์ต	Female	Poodle	3	Mass at mammary gland	Cystadenocarcinoma	≤8years	Purebred
134	2014	P5729766	D14-252	canine	เเมมโม้	Female	Mixed	12	Mass at mammary gland	Simple carcinoma(Solid type)	>8years	Mixed breed
135	2014	P5729745	D14-173	Feline	น้องพลอย	Male	DSH	16	Mass at mammary gland	Malignant mixed tumor	>8years	Mixed breed
136	2014	P5729271	D14-081	canine	บะหมี่	Female	GR	10	Mass at mammary gland	Simple carcinoma(Solid type)	>8years	Purebred
137	2014	P5302234	D14-082	canine	น้ำตาล	Female	Cocker	6	Mass at mammary gland	Benign mixed tumor	≤8years	Purebred
138	2014	P5730317	D14-321	canine	มีมี่	Female	Shitzu	11	Mass at mammary gland	Simple carcinoma(Solid type)	>8years	Purebred
139	2014	P5729335	D14-047	canine	ไมโล	Female	Mixed	10	Mass at mammary gland	Simple carcinoma(Solid type)	>8years	Mixed breed
140	2014	P5627976	D14-230	canine	หนูเล็ก	Female	Poodle	10	Mass at mammary gland	Malignant mixed tumor	>8years	Purebred
141	2014	P5733760	D14-1440	canine	อรอิน	Female	Mixed	5	Mass at mammary gland	Fibrosarcoma	≤8years	Mixed breed
142	2014	P5735635	D14-2115	Feline	ข้าวกล่ำ	Female	American shorthair	8 mo	Mass at mammary gland	Mammary gland adenoma	≤8years	Purebred
143	2014	P5729975	D14-300	canine	มู่หยง	Female	GR	5	Mass at mammary gland	Fibroma	≤8years	Purebred
144	2014	P5627868	D14-1766	canine	ไอดอล	Female	Pomeranian	9	Mass at mammary gland	Carcinoma in Situ	>8years	Purebred
145	2014	P5733695	D14-1463	Feline	เบบี้	Female	Persian	9	Mass at mammary gland	Cystadenocarcinoma	>8years	Purebred
146	2014	P5734140	D14-1574	canine	ทองขาว	Female	Mixed	12	Mass at mammary gland	Simple carcinoma(Solid type)	>8years	Mixed breed
147	2014	P5732057	D14-1292	canine	เต้าฮวย	Female	Mixed	8	Mass at mammary gland	Simple carcinoma (Anaplastic type)	≤8years	Mixed breed
148	2014	P5518048	D14-1402	canine	สำลี	Female	Mixed	12	Mass at mammary gland	Squamous cell carcinoma	>8years	Mixed breed
149	2014	P5734951	D14-1826	canine	มีโชค	Female	Shitzu	17	Mass at mammary gland	Simple carcinoma(Tubulopapillary type)	>8years	Purebred
150	2014	P5300810	D14-1825	canine	ดาวเรือง	Female	Poodle	6	Mass at mammary gland	Simple carcinoma (Anaplastic type)	≤8years	Purebred
151	2014	P5625032	D14-1975	canine	ถุงเท้า	Female	Mixed	10	Mass at mammary gland	Complex adenocarcinoma	>8years	Mixed breed
152	2014	P5735985	D14-2148	canine	บุญอุ้ม	Female	Poodle	12	Mass at mammary gland	Complex adenoma	>8years	Purebred
153	2014	P5736441	D14-2252	canine	โบนัส	Female	Shitzu	9	Mass at mammary gland	Benign mixed tumor	>8years	Purebred
154	2014	P5306811	D14-695	canine	ชมพู่	Female	Poodle	10	Mass at mammary gland	Complex carcinoma	>8years	Purebred
155	2014	P5732325	D14-947	canine	คุ๊กกี้	Female	Poodle	10	Mass at mammary gland	Simple carcinoma(Tubulopapillary type)	>8years	Purebred
156	2014	P5305422	D14-907	canine	ฟอร์ต	Female	Poodle	3	Mass at mammary gland	Anaplastic carcinoma	≤8years	Purebred
157	2014	P5730750	D14-479	canine	โกโก้	Female	Mixed	6	Mass at mammary gland	Simple carcinoma(Solid type)	≤8years	Mixed breed
158	2014	P5729954	D14-529	canine	หยินหยาง	Female	Pug	11	Mass at mammary gland	Complex carcinoma	>8years	Purebred
159	2014	P5304239	D14-594	canine	ดุกดิก	Female	Poodle	9	Mass at mammary gland	Simple carcinoma(Solid type)	>8years	Purebred
160	2014	P5730866	D14-629	canine	Happy	Female	Poodle	10	Mass at mammary gland	Benign mixed tumor	>8years	Purebred
161	2014	P5731026	D14-575	Feline	ไข่มุก	Female	DSH	10	Mass at mammary gland	Simple carcinoma(Solid type)	>8years	Mixed breed
162	2014	P5627765	D14-689	canine	ไข่พะโล้	Female	Cocker	10	Mass at mammary gland	Simple carcinoma (Anaplastic type)	>8years	Purebred
163	2014	P5731551	D14-748	canine	อ้อยควั่น	Female	Poodle	7	Mass at mammary gland	Complex adenoma	≤8years	Purebred
164	2014	P5730840	D14-702	Feline	นวล	Female	DSH	1	Mass at mammary gland	Simple carcinoma(Tubulopapillary type)	≤8years	Mixed breed
165	2014	P57300311	D14-320	canine	หนุงหนิง	Female	Mixed	9	Mass at mammary gland	Malignant mixed tumor	>8years	Mixed breed
166	2014	P5730020	D14-247	canine	ฟักทอง	Female	Shitzu	14	Mass at mammary gland	Tubulopapillary carcinoma	>8years	Purebred
167	2014	P5519910	D14-1955	canine	รถถัง	Female	Bull dog	13	Mass at mammary gland	Squamous cell carcinoma	>8years	Purebred
168	2014	P5732017	D14-863	canine	เลดี้	Female	Mixed	15	Mass at mammary gland	Simple carcinoma (Anaplastic type)	>8years	Mixed breed
169	2014	P5733545	D14-1363	canine	ปุกปุย	Female	Split	15	Mass at mammary gland	Complex adenoma	>8years	Purebred
170	2014	P5307767	D14-1573	canine	ปังปิ้ง	Female	Mixed	10	Mass at mammary gland	Cystadenoma	>8years	Mixed breed
171	2014	P5733788	D14-1507	canine	บุษบา	Female	Poodle	14	Mass at mammary gland	Complex carcinoma	>8years	Purebred
172	2014	P5734151	D14-1589	canine	โดนัท	Female	Mixed	10	Mass at mammary gland	Cystadenocarcinoma	>8years	Mixed breed
173	2014	P5729548	D14-100	canine	แพม	Female	Mixed	5	Mass at mammary gland	Simple carcinoma(Solid type)	≤8years	Mixed breed
174	2014	P5733456	D14-1366	canine	โซดา	Female	Poodle	7	Mass at mammary gland	Simple carcinoma(Tubulopapillary type)	≤8years	Purebred
175	2014	P5629072	D13-1770	canine	จินนี่	Female	Poodle	13	Mass at mammary gland	Simple carcinoma(Tubulopapillary type)	>8years	Purebred
176	2014	P5732356	D14-995	canine	ถุงทอง	Female	Mixed	10	Mass at mammary gland	Tubulopapillary carcinoma	>8years	Mixed breed
177	2014	P5732558	D14-1059	canine	ปุ๊กปิ๊ก	Female	Shitzu	11	Mass at mammary gland	Simple carcinoma (Anaplastic type)	>8years	Purebred
178	2014	P5300993	D14-1141	canine	บุญมาร์	Female	Yorkshire Terrier	11	Mass at mammary gland	Simple carcinoma(Solid type)	>8years	Purebred
179	2014	P5732508	D14-1001	canine	เป๊ปซี่	Female	Poodle	5	Mass at mammary gland	Complex carcinoma	≤8years	Purebred
180	2014	P5732057	D14-896	canine	เต้าฮวย	Female	Poodle	8	Mass at mammary gland	Myxosarcoma	≤8years	Purebred
181	2014	P5732178	D14-905	canine	ทองทอง	Female	Mixed	10	Mass at mammary gland	Tubulopapillary carcinoma	>8years	Mixed breed
182	2014	P5732174	D14-906	canine	ขวัญตา	Female	Poodle	7	Mass at mammary gland	Complex carcinoma	≤8years	Purebred
183	2014	P5732849	D14-1164	canine	ผักกาด	Female	mixed	5	Mass at mammary gland	Simple carcinoma (Anaplastic type)	≤8years	Mixed breed
184	2014	P5411562	D14-2038	canine	ถุงเงิน	Female	French bulldog	5	Mass at mammary gland	Simple carcinoma(Solid carcinoma)	≤8years	Purebred
185	2014	P5735821	D14-2078	canine	เเอบ	Female	Mixed	8	Mass at mammary gland	Fibrosarcoma	≤8years	Mixed breed
186	2014	P5735821	D14-2078	canine	เเอบ	Female	Mixed	8	Mass at mammary gland	Fibrosarcoma	≤8years	Mixed breed
187	2014	P5517408	D14-341	canine	นิลกาฬ	Female	Poodle	14	Mass at mammary gland	Simple carcinoma (Anaplastic type)	>8years	Purebred	Malignant
188	2015	P5843374	D15-2363	canine	ปีใหม่	Female	Bangkaew	12	Mass at mammary gland	Simple carinoma (Solid type)	>8years	Purebred	Malignant
189	2015	P5519910	D14-1955	Canine	รถถัง	Female	Bull dog	13	Mass at mammary gland	Squamous cell carcinoma	>8years	Purebred
190	2015	P5733257	D15-2844	Canine	โมโม่จัง	Female	Shitzu	15	Mass at mammary gland	Simple carcinoma ( Tubulopapillary type)	>8years	Purebred
191	2015	P5844833	D15-2886	Canine	เเมม	Female	Mixed	15	Mass at mammary gland	Spindle cell carcinoma	>8years	Mixed breed
192	2015	P5520530	D15-0427	Canine	เกี๊ยวซ่า	Female	Cocker	10	Mass at mammary gland	Complex carcinoma	>8years	Purebred
193	2015	P5837125	D15-229	Canine	เลดี้	Female	Poodle	8	Mass at mammary gland	Tubulopapillary carcinoma	≤8years	Purebred
194	2015	P5836830	D15-0212	Canine	สุมาลี	Female	Poodle	10	Mass at mammary gland	Complex carcinoma	>8years	Purebred
195	2015	P5414692	D15-2142	Canine	น้ำพริกอ่อง	Female	LR	10	Mass at mammary gland	Squamous cell carcinoma	>8years	Purebred
196	2015	P5300620	D15-2400	Canine	เเตงกวา	Female	Poodle	9	Mass at mammary gland	Simple carcinoma ( Tubulopapillary type)	>8years	Purebred
197	2015	P5840774	D15-2270	Canine	ถุงทอง	Female	Mixed	4	Mass at mammary gland	Simple carinoma (Solid type)	≤8years	Mixed breed
198	2015	P5835924	D15-1087	Canine	นู๋ดี	Female	Pug	2	Mass at mammary gland	Mammary gland cystadenoma	≤8years	Purebred
199	2015	P5628665	D15-2066	Canine	ข้าวเเตน	Female	Poodle	7	Mass at mammary gland	Benign mixed mammary gland tumor	≤8years	Purebred
200	2015	P5841161	D15-1520	Canine	บ๊อบบี้	Female	Mixed	12	Mass at mammary gland	Simple carinoma (Solid type)	>8years	Mixed breed
201	2015	P5729241	D15-0585	Canine	หนูดำ	Female	Mixed	15	Mass at mammary gland	Simple carcinoma ( Tubulopapillary type)	>8years	Mixed breed
202	2015	P5837728	D15-0418	Canine	เปอรติ้ส	Female	Shitzu	15	Mass at mammary gland	Simple carinoma (Solid type)	>8years	Purebred
203	2015	P5841851	D15-1807	Canine	เจ้าหมี	Female	Mixed	10	Mass at mammary gland	Fibrosarcoma	>8years	Mixed breed
204	2015	P5841851	D15-1807	Canine	เจ้าหมี	Female	Mixed	10	Mass at mammary gland	Complex carcinoma	>8years	Mixed breed
205	2015	P5837529	D15-0417	Canine	พลอย	Female	Shitzu	9	Mass at mammary gland	Simple carcinoma ( Tubulopapillary type)	>8years	Purebred
206	2015	P5839672	D15-1482	Canine	น้ำหวาน	Female	Poodle	11	Mass at mammary gland	Mammary glnad adenoma	>8years	Purebred
207	2015	P5521244	D15-1498	Canine	มอมแมม	Female	mixed	8	Mass at mammary gland	Simple carinoma (Solid type)	≤8years	Mixed breed
208	2015	P5840480	D15-1445	Canine	ฟร้อน	Female	Cocker	10	Mass at mammary gland	Simple carcinoma (Anaplastic type)	>8years	Purebred
209	2015	P5734522	D14-1709	Canine	หมูหยอง	Female	Shitzu	11	Mass at mammary gland	Complex adenoma	>8years	Purebred
210	2015	P5843179	D15-2318	Canine	แน็ท	Female	Mixed	11	Mass at mammary gland	Benign mixed mammary gland tumor	>8years	Mixed breed
211	2015	P5841898	D15-1961	Canine	จีจี้	Female	Cocker	11	Mass at mammary gland	Mixed mammary gland tumor	>8years	Purebred
212	2015	P5838056	D15-0495	Canine	เฉาก๊วย	Male	Poodle	15	Mass at mammary gland	Complex carcinoma	>8years	Purebred
213	2015	P5410891	D15-2457	Canine	Smiley	Female	GR	6	Mass at mammary gland	Simple carcinoma (cystic-papillary type)	≤8years	Purebred
214	2015	P5837922	D15-0443	Canine	ไข่หวาน	Female	Poodle	9	Mass at mammary gland	Cysadenocarcinoma	>8years	Purebred
215	2015	P5307246	D15-1519	Canine	ไข่เจียว	Female	Poodle	12	Mass at mammary gland	Simple carcinoma ( Tubulopapillary type)	>8years	Purebred
216	2015	P5837434	D15-0401	Feline	มันนี่	Female	DSH	12	Mass at mammary gland	Mammary gland cystadenoma	>8years	Mixed breed
217	2015	P5841074	D15-1496	Canine	โย่	Female	Mixed	9	Mass at mammary gland	Tubulopapillary carcinoma	>8years	Mixed breed
218	2015	P5837319	D15-0261	Canine	ขนมครก	Female	Poodle	10	Mass at mammary gland	Complex carcinoma	>8years	Purebred
219	2015	P5840186	D15-1175	Canine	เเตงโม	Female	Poodle	10	Mass at mammary gland	Simple carcinoma ( Tubulopapillary type)	>8years	Purebred
220	2015	P5839672	D15-1007	Canine	น้ำหวาน	Female	Poodle	11	Mass at mammary gland	Simple carcinoma ( Tubulopapillary type)	>8years	Purebred
221	2015	P5838145	D15-0518	Canine	ถั่วเหลือง	Male	Pit Bull	5	Mass at mammary gland	Simple carcinoma ( Tubulopapillary type)	≤8years	Purebred
222	2015	P5413012	D15-0496	Canine	แทมมี่	Female	LR	7	Mass at mammary gland	Simple carcinoma ( Tubulopapillary type)	≤8years	Purebred
223	2015	P5519189	D15-2807	Canine	โรบิน	Female	Miniature	11	Mass at mammary gland	Benign mixed mammary tumor	>8years	Purebred
224	2015	P5729766	D15-1745	Canine	แมมโบ้	Female	Mixed	13	Mass at mammary gland	Fibrosarcoma	>8years	Mixed breed
225	2015	P5840431	D15-1246	Canine	แก้ว	Male	Mixed	7	Mass at mammary gland	Simple carcinoma ( Tubulopapillary type)	≤8years	Mixed breed
226	2015		D15-1155	Canine	จิ่งจัง	Female	Shitzu	5	Mass at mammary gland	Complex adenoma	≤8years	Purebred
227	2015	P5840246	D15-1176	Canine	หมีมี้	Female	Poodle	11	Mass at mammary gland	Benign mixed mammary tumor	>8years	Purebred
228	2015	P5839402	D15-1194	Canine	ข้าวปุ้น	Female	Poodle	12	Mass at mammary gland	Simple carcinoma ( Tubulopapillary type)	>8years	Purebred
229	2015	P5840352	D15-1208	Canine	มอมเเมม	Male	Mixed	10	Mass at mammary gland	Simple carcinoma (Solid type)	>8years	Mixed breed
230	2015	P5414384	D15-1685	Canine	จูลี่	Female	Cocker	9	Mass at mammary gland	Fibrosarcoma	>8years	Purebred
231	2015	P5843197	D15-2319	Canine	ตุ้มเงิน	Female	Poodle	9	Mass at mammary gland	Malignant mixed tumor	>8years	Purebred
232	2015	P5303972	D15-2250	Canine	New	Female	Cocker	9	Mass at mammary gland	Simple carcinoma (Solid type)	>8years	Purebred
233	2015	P5730867	D15-2251	Canine	น้ำตาล	Female	Shitzu	13	Mass at mammary gland	Simple carcinoma (Solid type)	>8years	Purebred
234	2015	P5841281	D15-1945	Canine	น้องเเบม	Female	Mixed	13	Mass at mammary gland	Basal cell adenoma	>8years	Mixed breed
235	2015	P5841987	D15-1897	Canine	ไทเกอร์	Female	Mixed	7	Mass at mammary gland	Benign mixed mammary gland tumor	≤8years	Mixed breed
236	2015	P5838880	D15-1628	Canine	ปุย	Female	Poodle	15	Mass at mammary gland	Simple carcinoma (Solid type)	>8years	Purebred
237	2015	P5733704	D14-1472	Feline	แม่เเมว	Female	Siamese	10	Mass at mammary gland	Simple carcinoma ( Tubulopapillary type)	>8years	Purebred
238	2014	P5627680	D14-1542	Canine	มู่หลาน	Female	Mixed	6	Mass at mammary gland	Complex carcinoma	≤8years	Mixed breed
239	2015	P5518727	D14-1430	Canine	คิตตี้	Female	Bangkaew	10	Mass at mammary gland	Simple carcinoma (Anaplastic type)	>8years	Purebred
240	2015	P5733898	D14-1498	Canine	จาว่า	Female	Shitzu	12	Mass at mammary gland	Complex adenocarcinoma	>8years	Purebred
241	2015	P5733383	D14-1310	Canine	ปิง	Female	Mixed	13	Mass at mammary gland	Simple carcinoma (Anaplastic type)	>8years	Mixed breed
242	2015	P5838093	D15-0539	Feline	ทอง	Female	DSH	12	Mass at mammary gland	Osteosarcoma	>8years	Mixed breed
243	2015	P5625119	D14-2065	Canine	คิตตี้	Female	Poodle	12	Mass at mammary gland	Cysadenocarcinoma	>8years	Purebred
244	2015	P5732681	D14-1997	Canine	จูเนียร์	Female	Poodle	10	Mass at mammary gland	Lipid-rich mammary carcinoma with lymph node metastasis	>8years	Purebred
245	2015	P5839635	D15-968	Canine	มูมู่	Female	GR	7	Mass at mammary gland	Simple carcinoma (Solid type)	≤8years	Purebred
246	2015	P5839145	D15-0813	Canine	แพนดี้	Female	Mixed	14	Mass at mammary gland	Simple carcinoma ( Tubulopapillary type)	>8years	Mixed breed
247	2015	P5839237	D15-0860	Canine	คนอร์	Male	GR	8	Mass at mammary gland	Simple carcinoma (Anaplastic type)	≤8years	Purebred
248	2015	P5624706	D15-2190	Canine	คิตตี้	Female	Shitzu	15	Mass at mammary gland	Malignant mixed mammary gland tumor	>8years	Purebred
249	2015	P5842613	D15-2100	Canine	โฟร์มด	Female	Poodle	8	Mass at mammary gland	Benign mixed mammary gland tumor	≤8years	Purebred
250	2015	P5736089	D15-1245	Canine	สำลี	Female	Mixed	5	Mass at mammary gland	Tubulopapillary cystadenoma	≤8years	Mixed breed
251	2015	P5302234	D15-0206	Canine	น้ำตาล	Female	Cocker	7	Mass at mammary gland	Simple carcinoma ( Tubulopapillary type)	≤8years	Purebred
252	2015	P5838337	D15-0605	Canine	โม้โม้	Female	Spitz	5	Mass at mammary gland	Simple carinoma (Solid type)	≤8years	Purebred
253	2015	P5409966	D15-1085	Canine	แพนด้า	Female	GR	7	Mass at mammary gland	Fibrosarcoma	≤8years	Purebred
254	2015	P5842748	D15-2373	Canine	จิ๊บ	Female	Mixed	9	Mass at mammary gland	Benign mixed mammary gland tumor	>8years	Mixed breed
255	2015	P5518711	D15-2269	Canine	อะตอม	Female	GR	12	Mass at mammary gland	Benign mixed mammary tumor	>8years	Purebred
256	2015	P5840431	D15-2067	Canine	แก้ว	Male	Mixed	7	Mass at mammary gland	Solid carcinoma with metastasis in the lymph node	≤8years	Mixed breed
257	2015	P5843790	D15-2496	Canine	ใบเตย	Female	Shitzu	6	Mass at mammary gland	Simple carcinoma (Solid type)	≤8years	Purebred
258	2015	P5839781	D15-2498	Canine	มดส้ม	Female	Cocker	11	Mass at mammary gland	Simple carinoma (Solid type)	>8years	Purebred
259	2015	P5839520	D15-1041	Canine	เจ้าหล่อน	Female	Shitzu	14	Mass at mammary gland	Cystadenocarcinoma	>8years	Purebred
260	2015	P5842464	58 B 239	Canine	พุดดิ้ง	Female	Mixed	10	Mass at mammary gland	Simple tubular adenocarcinoma	>8years	Mixed breed
261	2015	P5410883	58 B 188	Canine	ร็อกกี้	Female	Mixed	10	Mass at mammary gland	Benign mixed mammary tumor	>8years	Mixed breed
262	2016	P5948092	D16-1048	Canine	เดอะวัน	Female	Siberian Husky	13	Mass at mammary gland	Simple carcinoma ( Tubulopapillary type)	>8years	Purebred
263	2016	P5951391	D16-2470	Canine	หลง	Female	Mixed	10	Mass at mammary gland	Simple carcinoma ( Tubulopapillary type)	>8years	Mixed breed
264	2016	P5952277	D16-2761	Canine	กล้วยหอม	Female	Siberian Husky	8	Mass at mammary gland	Simple carcinoma ( Tubulopapillary type)	≤8years	Purebred
265	2016	P5950386	D16-2004	Canine	หลง	Female	Mixed	10	Mass at mammary gland	Simple carcinoma ( Tubulopapillary type)	>8years	Mixed breed
266	2016	P5946142	D16-0495	Canine	มันนี่	Female	Poodle	10	Mass at mammary gland	Benign mixed mammary gland tumor, Osteosarcoma	>8years	Purebred
267	2016	P5947606	D16-0888	Canine	มีสุข	Female	Mixed	8	Mass at mammary gland	Osteosarcoma	≤8years	Mixed breed
268	2016	P5950259	D16-1938	Canine	ปุ้มปุ้ย	Female	Mixed	15	Mass at mammary gland	Simple carcinoma ( Solid type)	>8years	Mixed breed
269	2016	P5842149	D16-0909	Canine	ลีลี่	Female	GR	11	Mass at mammary gland	Simple carcinoma ( Solid type)	>8years	Purebred
270	2016	P5623392	D16-0165	Canine	ยุหว่า	Female	Mixed	9	Mass at mammary gland	Simple carcinoma ( Solid type)	>8years	Mixed breed
271	2016	P5949942	D16-1875	Canine	จุ๊บเเจง	Female	Mixed	14	Mass at mammary gland	Complex carcinoma, Mixed mammary gland tumor	>8years	Mixed breed
272	2016	P5945591	D16-0297	Canine	Baby	Female	German Sheperd	9	Mass at mammary gland	Benign mixed mammary gland tumor	>8years	Purebred
273	2016	P5736483	D16-0768	Canine	โคล่า	Female	Shitzu	11	Mass at mammary gland	Benign mixed mammary gland tumor	>8years	Purebred
274	2016	P5945957	D16-0683	Canine	เดย์ซี่	Female	LR	10	Mass at mammary gland	Benign mixed mammary gland tumor	>8years	Purebred
275	2016	P5301412	D16-1620	Canine	เเม๊ว	Female	Poodle	15	Mass at mammary gland	Benign mixed mammary gland tumor	>8years	Purebred
276	2016	P5844663	D16-1854	Canine	จ๊ะโอ๋	Female	Shitzu	11	Mass at mammary gland	Simple carcinoma (anaplastic type)	>8years	Purebred
277	2016	P5843665	D16-1888	Canine	ขาหมู	Female	Spitz	12	Mass at mammary gland	Simple carcinoma ( Solid type) with cyst	>8years	Purebred
278	2016	P5950248	D16-1939	Canine	ชินล่า	Female	Shitzu	4	Mass at mammary gland	Mixed mammary gland tumor	≤8years	Purebred
279	2016	P5951632	D16-2493	Canine	หมูปิ้ง	Female	Mixed	9	Mass at mammary gland	Simple carcinoma ( Solid type)	>8years	Mixed breed
280	2016	P5623358	D16-3037	Canine	มินนี่	Female	Mixed	10	Mass at mammary gland	Fibrosarcoma	>8years	Mixed breed
281	2016	P5946578	D16-2729	Canine	น้องเเบม	Female	Poodle	10	Mass at mammary gland	Adrenocarcinoma	>8years	Purebred
282	2016	P5952027	D16-2643	Canine	เฉาก๊วย	Female	Poodle	10	Mass at mammary gland	Simple carcinoma ( Tubulopapillary type)	>8years	Purebred
283	2016	P5952009	D16-2642	Canine	Lucky	Female	Mixed	14	Mass at mammary gland	Complex carcinoma was highly suspected	>8years	Mixed breed
284	2016	P5730761	D16-1543	Canine	น้องดำ	Female	Mixed	14	Mass at mammary gland	Mixed mammary gland tumor	>8years	Mixed breed
285	2016	P5949471	D16-1685	Canine	จินนี่	Female	Chihuahua	11	Mass at mammary gland	Simple carcinoma ( Solid type)	>8years	Purebred
286	2016	P5300620	D16-0248	Canine	เเตงกวา	Female	Poodle	9	Mass at mammary gland	Simple carcinoma ( Solid type)	>8years	Purebred
287	2016	P5949736	D16-1828	Canine	ลินลิน	Female	Chow Chow	10	Mass at mammary gland	Mixed mammary gland tumor	>8years	Purebred
288	2016	P5950322	D16-2155	Canine	เอาว์ฟี่	Female	Shitzu	10	Mass at mammary gland	Simple carcinoma ( Solid type)	>8years	Purebred
289	2016	P5951105	D16-2279	Canine	Gogo	Female	Mixed	10	Mass at mammary gland	Complex carcinoma	>8years	Mixed breed
290	2016	P5950174	D16-1937	Canine	พริกไทย	Female	Poodle	3	Mass at mammary gland	Mixed mammary gland tumor	≤8years	Purebred
291	2016	P5949220	D16-1903	Canine	ปุ้มปุ้ย	Female	Mixed	10	Mass at mammary gland	Simple carcinoma ( Solid type)	>8years	Mixed breed
292	2016	P5949231	D16-1654	Canine	กะทิ	Female	Mixed	10	Mass at mammary gland	Simple carcinoma ( Solid type)	>8years	Mixed breed
293	2016	P5949196	D16-1545	Canine	ดวง	Female	Mixed	12	Mass at mammary gland	Simple carcinoma ( Solid type)	>8years	Mixed breed
294	2016	P5949637	D16-1800	Canine	เปอร์เซีย	Female	Shitzu	3	Mass at mammary gland	Complex carcinoma	≤8years	Purebred
295	2016	P5624913	D16-1405	Canine	มีมี่	Female	Yorkshire	10	Mass at mammary gland	Simple carcinoma ( Solid type)	>8years	Purebred
296	2016	P5949611	D16-1572	Canine	อิฐ	Female	Mixed	15	Mass at mammary gland	Simple carcinoma ( Anaplastic type) with inguinal lymph node metastasis	>8years	Mixed breed
297	2016	P5948703	D16-1339	Canine	ยุกยิก	Female	Mixed	14	Mass at mammary gland	Simple carcinoma ( Solid type)	>8years	Mixed breed
298	2016	P5946324	D16-0524	Canine	น้ำตาล	Female	Mixed	9	Mass at mammary gland	Benign mixed mammary gland tumor	>8years	Mixed breed
299	2016	P5520090	D16-0821	Canine	เฮง เฮง	Female	Shitzu	12	Mass at mammary gland	Simple carcinoma (Tubulopapillary carcinoma)	>8years	Purebred
300	2016	P5947802	D16-0978	Canine	เปปซี่	Female	Shitzu	10	Mass at mammary gland	Simple carcinoma (Solid type)	>8years	Purebred
301	2016	P5947039	D16-0810	Canine	ฟักทอง	Female	Shitzu	13	Mass at mammary gland	Simple carcinoma (anaplastic carcinoma)	>8years	Purebred
302	2016	P5947011	D16-1022	Canine	น้ำตาล	Female	Mixed	9	Mass at mammary gland	Benign mixed mammary gland tumor	>8years	Mixed breed
303	2016	P5945833	D16-0512	Canine	ดุ๊กดิ๊ก	Female	Mixed	12	Mass at mammary gland	Complex carcinoma	>8years	Mixed breed
304	2016	P5947536	D16-0911	Canine	จินนี่	Female	Poodle	6	Mass at mammary gland	Complex carcinoma	≤8years	Purebred
305	2016	P5302592	D16-0684	Canine	หมีพูห์	Female	Mixed	12	Mass at mammary gland	Complex carcinoma	>8years	Mixed breed
306	2016	P5948328	D16-1188	Canine	น้องนัวร์	Female	Dachshund	11	Mass at mammary gland	Simple adenoma	>8years	Purebred
307	2016	P5412732	D16-0454	Canine	จ๊อบเเจ๊บ	Female	Mixed	12	Mass at mammary gland	Simple carcinoma ( Tubulopapillary type)	>8years	Mixed breed
308	2016	P5412869	D16-0496	Canine	โฟม	Female	Cocker Spaniel	10	Mass at mammary gland	Noninfiltrating(in Situ) carcinomas	>8years	Purebred
309	2016	P5946134	D16-0455	Canine	เเป๊ปซี่	Female	German Sheperd	11	Mass at mammary gland	Benign mixed mammary gland tumor	>8years	Purebred
310	2016	P5414747	D16-1233	Canine	ปังญ่า	Female	GR	8	Mass at mammary gland	Benign mixed mammary gland tumor	≤8years	Purebred
311	2016	P5520250	D16-1689	Canine	ถุงเงิน	Female	Poodle	9	Mass at mammary gland	Simple carcinoma ( Anaplastic type)	>8years	Purebred
312	2016	P5520250	D16-1689	Canine	ถุงเงิน	Female	Poodle	9	Mass at mammary gland	Simple adenocarcinoma	>8years	Purebred
313	2017	P5730390	D14-355	canine	กุ้ยช่าย	female	shitzu	7	Mass at mammary gland	complex carcinoma	≤8years	Purebred
314	2017	P6008123	D17-1990	Canine	เเบล็ก	female	Mixed	14	Mass at mammary gland	Simple carcinoma (Solid pattern, tubulopapillary pattern)	>8years	Mixed breed
315	2017	P6009249	D17-2451	Canine	คิม	female	Mixed	13	Mass at mammary gland	Simple carcinoma (Solid type)	>8years	Mixed breed
316	2017	P6008893	D17-2303	Canine	เกมส์	female	Shitzu	9	Mass at mammary gland	Simple carcinoma (tubulopapillary type)	>8years	Purebred
317	2017	P6008760	D17-2234	Canine	พิบี้	female	Siberian	9	Mass at mammary gland	Simple carcinoma (tubulopapillary type)	>8years	Purebred
318	2017	P5731728	D17-1089	Canine	พลอย	female	Yorkshire	7	Mass at mammary gland	Simple carcinoma (tubulopapillary type)	≤8years	Purebred
319	2017	P5950453	D17-0225	Canine	จีจี้	female	Shitzu	10	Mass at mammary gland	Complex carcinoma	>8years	Purebred
320	2017	P59101000045	D17-0085	Canine	ปุย	Female	Mixed	14	Mass at mammary gland	Simple carcinoma (tubulopapillary type)	>8years	Mixed breed
321	2017	P6002554	D17-0152	Canine	แป๊ปซี่	female	Poodle	10	Mass at mammary gland	Simple carcinoma (tubulopapillary type)	>8years	Purebred
322	2017	P6011228	D17-3032	Canine	โป่งเหน่ง	female	Mixed	10	Mass at mammary gland	Complex carcinoma	>8years	Mixed breed
323	2017	P6006924	D17-1536	Canine	อุ๋งอิ๋ง	female	Poodle	11	Mass at mammary gland	Benign mixed mammary gland tumor	>8years	Purebred
324	2017	P6004619	D17-0938	Canine	มูมู่	female	Mixed	9	Mass at mammary gland	Complex carcinoma	>8years	Mixed breed
325	2017	P6003336	D17-1551	Canine	ชิชา	female	Mixed	12	Mass at mammary gland	Simple carcinoma (tubulopapillary type)	>8years	Mixed breed
326	2017	P6003336	D17-1551	Canine	ชิชา	female	Mixed	12	Mass at mammary gland	Benign mixed mammary gland tumor	>8years	Mixed breed
327	2017	P6004892	D17-0926	Canine	หมูแฮม	female	Mixed	9	Mass at mammary gland	Mixed mammary gland tumor	>8years	Mixed breed
328	2017	P6003465	D17-0653	Feline	เบบี้	female	Persian	11	Mass at mammary gland	Simple carcinoma (tubulopapillary type)	>8years	Purebred
329	2017	P6003465	D17-0653	Feline	เบบี้	female	Persian	11	Mass at mammary gland	Simple adenoma	>8years	Purebred
330	2017	P6003526	D17-0552	Feline	อ้วน	female	DSH	14	Mass at mammary gland	Simple carcinoma (tubulopapillary type)	>8years	Mixed breed
331	2017	P6012042	D17-3231	Canine	มูมู่	female	Pug	10	Mass at mammary gland	Simple carcinoma (Solid type)	>8years	Purebred
332	2017	P6007872	D17-1892	Canine	ข้าวเม่า	female	Mixed	10	Mass at mammary gland	Squamous cell carcinoma (SCC)	>8years	Mixed breed
333	2017	P5303917	D17-3021	Canine	น้ำชา	female	Labrador Retriever	7	Mass at mammary gland	Simple carcinoma (Solid type)	≤8years	Purebred
334	2017	P6007895	D17-2279	Feline	ญาญ่า	female	Persian	8 mo	Mass at mammary gland	Simple adenoma	≤8years	Purebred
335	2017	P5843375	D17-0015	Canine	ฟักทอง	female	German sheperd	12	Mass at mammary gland	Simple adenoma with cyst	>8years	Purebred
336	2017	P6005484	D17-1784	Canine	น้ำตาล	female	Mixed	8	Mass at mammary gland	Fibrosarcoma	≤8years	Mixed breed
337	2017	P6004074	D17-0708	Canine	แนนซี่	female	Jack Russell	9	Mass at mammary gland	Benign mixed mammary gland tumor	>8years	Purebred
338	2017	P5623207	D17-1070	Canine	อุ่นเรือน	female	Poodle	14	Mass at mammary gland	Osteosarcoma	>8years	Purebred
339	2017	P6006478	D17-1434	Canine	หมูแดง	female	Mixed	7	Mass at mammary gland	Benign mixed mammary gland tumor	≤8years	Mixed breed
340	2017	P6006206	D17-1396	Canine	จู้จี้	female	Mixed	6	Mass at mammary gland	Benign mixed mammary gland tumor	≤8years	Mixed breed
341	2017	P6010546	D17-2820	Canine	อีปี้	female	Mixed	10	Mass at mammary gland	Simple carcinoma (anaplastic type)	>8years	Mixed breed
342	2017	P5901439	D17-0425	Canine	ชบา	female	Miniature	12	Mass at mammary gland	Simple carcinoma (Solid type)	>8years	Purebred
343	2017	P6009382	D17-2478	Canine	เศรษฐี	female	Poodle	12	Mass at mammary gland	Simple carcinoma (anaplastic type)	>8years	Purebred
344	2017	P6009273	D17-2512	Canine	ไข่ดาว	female	Shitzu	10	Mass at mammary gland	Simple carcinoma (Solid type)	>8years	Purebred
345	2017	P5842178	D17-2711	Canine	น้องกล้วยหอม	female	Poodle	11	Mass at mammary gland	Complex carcinoma	>8years	Purebred
346	2017	P6009124	D17-2759	Canine	เงิน	female	Mixed	7	Mass at mammary gland	Simple carcinoma (anaplastic type)	≤8years	Mixed breed
347	2017	P6010981	D17-2924	Canine	มะลิ	female	Bangkaew	7	Mass at mammary gland	Simple carcinoma (Solid type)	≤8years	Purebred
348	2018	P6116778	D18-1301	Canine	ทีน่า	Female	Mixed	10	Mass at mammary gland	Papillary cystic adenocarcinoma with suppurative mastitis	>8years	Mixed breed
349	2018	P5902030	CHM370	Feline	มั่งมี	Female	DSH	8	Mass at mammary gland	Simple tubular carcinoam grade 2	≤8years	Mixed breed
350	2018	P5901375	CHM125	Canine	ลูกชิ้น	Female	Poodle	8	Mass at mammary gland	Simple tubular adenocarcinoma Grade 2	≤8years	Purebred
351	2018	P5842178	CHM141	Canine	น้องกล้วยหอม	Female	Poodle	12	Mass at mammary gland	Solid carcinoma and anaplastic carcinoma Grade 3	>8years	Purebred
352	2018	P6114137	CHM126	Feline	Tingerbell	Female	Persian	7	Mass at mammary gland	Simple papillary adenoma	≤8years	Purebred
353	2018	P6115533	CHM174	Canine	จิกปิก	Female	Mixed	15	Mass at mammary gland	Extraskeletal osteosarcoma	>8years	Mixed breed
354	2018	P5516944	CHM331	Canine	ปองปอง	Female	Poodle	9	Mass at mammary gland	Benign mixed mammary gland tumor	>8years	Purebred
355	2018	P6117248	CHM480	Canine	ใบเงิน	Female	Shitzu	8	Mass at mammary gland	Papillary cystic adenocarcinoma grade 2	≤8years	Purebred
356	2018	P61133195	CHM062	Feline	ตาหวาน	Female	DSH	12	Mass at mammary gland	Simple tubulo-papillary adenocarcinoma	>8years	Mixed breed
357	2018	P6119046	CHM439	Canine	มอมแมม	Female	Mixed	11	Mass at mammary gland	Simple papillary cystic adenoma	>8years	Mixed breed
358	2018	P6008725	D18-2025	Canine	น้องเชลซี	Female	Shitzu	7	Mass at mammary gland	Complex mammary carcinoma	≤8years	Purebred
359	2018	P6113115	D18-0267	Canine	ฟ้าใส	Female	Poodle	10	Mass at mammary gland	Simple carcinoma (tubulopapillary pattern)	>8years	Purebred
360	2018	P6113378	D18-0367	Canine	จังกึม	Female	Poodle	11	Mass at mammary gland	Osteosarcoma	>8years	Purebred
361	2018	P6113663	D18-0460	Canine	พัตต์	Female	Chihuahua	10	Mass at mammary gland	Mixed mammary gland tumor	>8years	Purebred
362	2018	P6113802	D18-0492	Canine	แหม่ม	Female	Poodle	11	Mass at mammary gland	Simple carcinoma (tubulopapillary pattern)	>8years	Purebred
363	2018	P6112369	D18-0511	Canine	มะลิ	Female	Poodle	12	Mass at mammary gland	Complex carcinoma	>8years	Purebred
364	2018	P6114103	D18-0573	Canine	ทอง	Female	Golden Retrever	6	Mass at mammary gland	Compex carcinoma	≤8years	Purebred
365	2018	P6114290	D18-0645	Canine	บุ๋มบิ๋ม	Female	Poodle	8	Mass at mammary gland	Simple carcinoma (tubulopapillary pattern)	≤8years	Purebred
366	2018	P5521778	D18-2184	Canine	คุกกี้	Female	Poodle	7	Mass at mammary gland	Mammary mixed tumor	≤8years	Purebred
367	2018	P6006059	D18-2254	Canine	ถุงทอง	Female	Mixed	11	Mass at mammary gland	Mammary mixed tumor	>8years	Mixed breed
368	2018	P6119671	D18-2519	Canine	ข้าวปั้น	Female	Poodle	7	Mass at mammary gland	Mammary mixed tumor	≤8years	Purebred
369	2018	P6119594	D18-2560	Canine	มีมี่	Female	Poodle	10	Mass at mammary gland	Mammary mixed tumor and complex mammary carcinoma	>8years	Purebred
370	2018	P6113804	D18-2626	Canine	ครัวซอง	Female	Cocker Spaniel	14	Mass at mammary gland	Mammary mixed tumor	>8years	Purebred
371	2018	P6119151	D18-2479	Canine	ลักกี้	Female	Mixed	7	Mass at mammary gland	Anaplastic carcinoma	≤8years	Mixed breed
372	2018	P6118743	D18-2175	Feline	ยูยี่	Female	Persian	10	Mass at mammary gland	Simple carcinoma (tubular type)	>8years	Purebred
373	2018	P6118751	D18-2172	Feline	สามสี	Female	DSH	10	Mass at mammary gland	Solid mammary gland carcinoma	>8years	Mixed breed
374	2018	P5841061	D18-1605	Canine	ปุ๊ก	Female	Poodle	12	Mass at mammary gland	Simple carcinoma (Tubulopapillary type)	>8years	Purebred
375	2018	P61168451	D18-1606	Canine	คุกกี้	Female	Golden Retrever	11	Mass at mammary gland	Simple mammary carcinoma (Tubular type)	>8years	Purebred
376	2018	P6118106	D18-1849	Canine	หมูแดง	Female	Mixed	16	Mass at mammary gland	Complex carcinoma	>8years	Mixed breed
377	2018	P6118289	D18-1929	Canine	หมูแดง	Female	Shitzu	12	Mass at mammary gland	Simple mammary carcinoma (Papillary type)	>8years	Purebred
378	2018	P6118289	D18-1929	Canine	หมูแดง	Female	Shitzu	12	Mass at mammary gland	Simple mammary carcinoma (Tubular type)	>8years	Purebred
379	2018	P6118289	D18-1929	Canine	หมูแดง	Female	Shitzu	12	Mass at mammary gland	Solid mammary carcinoma	>8years	Purebred
380	2018	P61118386	D18-1957	Canine	สเปค	Female	Mixed	10	Mass at mammary gland	Anaplastic carcinoma	>8years	Mixed breed
381	2018	P5841061	D18-2024	Canine	ปุ๊ก	Female	Poodle	12	Mass at mammary gland	Simple carcinoma (Tubulopapillary type)	>8years	Purebred
382	2018	P6118774	D18-2104	Canine	เตียนหอม	Female	Shitzu	13	Mass at mammary gland	Mammary mixed tumor	>8years	Purebred
383	2018	P5628625	D18-0747	Canine	ปาร์ตี้	Female	Shitzu	5	Mass at mammary gland	Complex carcinoma	≤8years	Purebred
384	2018	P6114703	D18-0788	Canine	ยูริโกะ	Female	Chihuahua	10	Mass at mammary gland	Complex carcinoma	>8years	Purebred
385	2018	P6119821	D18-0903	Canine	แองเจิ้ล	Female	American Pitbull	10	Mass at mammary gland	Anaplastic carcinoma	>8years	Purebred
386	2018	P6115534	D18-0953	Canine	สนิม	Female	Mixed	8	Mass at mammary gland	Anaplastic carcinoma	≤8years	Mixed breed
387	2018	P6115673	D18-0987	Canine	บูบู้	Female	Mixed	8	Mass at mammary gland	Mammary mixed tumor	≤8years	Mixed breed
388	2018	P6114699	D18-0989	Canine	เหมย	Female	Mixed	10	Mass at mammary gland	Complex adenoma	>8years	Mixed breed
389	2018	P5842178	D18-1044	Canine	น้องกล้วยหอม	Female	Poodle	12	Mass at mammary gland	Complex carcinoma	>8years	Purebred
390	2018	P6121242	D18-3129	Canine	โค้ก	Female	Daschund	11	Mass at mammary gland	Complex carcinoma	>8years	Purebred
391	2018	P6114669	D18-0789	Canine	เหมย	Female	Mixed	11	Mass at mammary gland	Simple carcinoma (tubular type)	>8years	Mixed breed
392	2018	P5842178	D18-1044	Canine	น้องกล้วยหอม	Female	Poodle	12	Mass at mammary gland	Complex carcinoma	>8years	Purebred
393	2018	P6116147	D18-1095	Canine	วันดี	Female	Mixed	7	Mass at mammary gland	Solid carcinoma	≤8years	Mixed breed
394	2018	P6116401	D18-1099	Canine	บุ๋ย	Female	Mixed	13	Mass at mammary gland	Fibroadenoma	>8years	Mixed breed
395	2018	P6416370	D18-1219	Canine	วินดี้	Female	Golden Retrever	9	Mass at mammary gland	Simple mammary adenoma	>8years	Purebred
396	2019	P5902030	D19-1601	Feline	มั่งมี	Female	DSH	9	Mass at mammary gland	Tubular carcinoma	>8years	Mixed breed
397	2019	P6225636	D19-1550	Canine	แบมแบม	Female	Beagle	11	Mass at mammary gland	Tubular carcinoma	>8years	Purebred
398	2019	P6227084	D19-2154	Canine	โคโค่	Male	Mixed	1	Mass at mammary gland	Complex adenoma	≤8years	Mixed breed
399	2019	P6007062	D19-0300	Canine	แฮปปี้	Female	Dachshund	11	Mass at mammary gland	Benign mixed tumor	>8years	Purebred
400	2019	P6113804	D19-0323	Canine	ครัวซอง	Female	Mixed	14	Mass at mammary gland	Solid mammary gland carcinoma	>8years	Mixed breed
401	2019	P6121574	CHM10	Canine	บุญหลง	Female	Cocker spaniel	10	Mass at mammary gland	Complex adenocarcinoma	>8years	Purebred
402	2019	P5948799	D19-0072	Canine	โทนี่	Female	Miniature	12	Mass at mammary gland	Solid mammary gland carcinoma	>8years	Purebred
403	2019	P6222520	D19-0255	Canine	Beth	Female	Alaskan Malamute	9	Mass at mammary gland	Mammary mixed tumor grade 2	>8years	Purebred
404	2019	P6121632	D19-0416	Feline	ขาวขาว	Female	DSH	10	Mass at mammary gland	Simple mammary carcinoma (Tubular type)	>8years	Mixed breed
405	2019	P6223021	D19-0482	Canine	ซูซาน	Female	Chihuahua	9	Mass at mammary gland	Complex carcinoma	>8years	Purebred
406	2019	P6224188	D19-0904	Canine	พุงพลุ้ย	Female	Shitzu	10	Mass at mammary gland	Solid carcinoma	>8years	Purebred
407	2019	P5305218	D19-1381	Canine	เฉาก๊วย	Female	Mixed	8	Mass at mammary gland	Comedocarcinoma	≤8years	Mixed breed
408	2019	P6225149	D19-1271	Canine	บี	Female	Chihuahua	14	Mass at mammary gland	Simple mammary carcinoma (Cystic papillary type)	>8years	Purebred
409	2019	P6225051	D19-1273	Canine	กุ๊ชชี่	Female	Poodle	12	Mass at mammary gland	Fibroadenoma	>8years	Purebred
410	2019	P6224811	D19-1162	Canine	ปุ๊กกี้	Female	Poodle	10	Mass at mammary gland	Complex adenoma	>8years	Purebred
411	2019	P6226185	D19-1706	Feline	กาฟิลด์	Female	DSH	8	Mass at mammary gland	Cribiform carcinoma	≤8years	Mixed breed
412	2019	P6222705	D19-1142	Canine	ลาเต้	Female	Shitzu	9	Mass at mammary gland	Complex carcinoma	>8years	Purebred
413	2019	P6224843	D19-1163	Canine	คุ้กกี้	Female	Mixed	13	Mass at mammary gland	Complex carcinoma	>8years	Mixed breed
414	2019	P6223527	D19-1686	Feline	ชมพู่	Female	Persian	2	Mass at mammary gland	Comedocarcinoma	≤8years	Purebred
415	2019	P6225619	D19-1495	Canine	กาแฟ	Female	Mixed	10	Mass at mammary gland	Anaplastic carcinoma	>8years	Mixed breed
416	2019	P6226171	CHM333	Canine	สไปรท์	Female	Mixed	3	Mass at mammary gland	Papillary adenocarcinoma	≤8years	Mixed breed
417	2019	P6227241	CHM384	Canine	โปรเจค	Female	Pomeranian	4	Mass at mammary gland	Solid carcinoma	≤8years	Purebred
418	2019	P6225346	CHM285	Feline	โมง	Female	DSH	5	Mass at mammary gland	Simple tubular adenocarcinoma, grade 2	≤8years	Mixed breed
419	2019	P6225211	CHM235	Canine	ส้มโอ	Female	Mixed	5	Mass at mammary gland	Benign mixed mammary tumor	≤8years	Mixed breed
420	2019	P6223410	CHM234	Canine	หมูน้อย	Female	Shitzu	3	Mass at mammary gland	Simple papillary and ductal adenocarcinoma, grade 1	≤8years	Purebred
421	2019	P6225383	CHM268	Canine	สีขาว	Female	Mixed	10	Mass at mammary gland	Anaplastic carcinoma	>8years	Mixed breed
422	2019	P5628666	CHM149	Canine	ข้าวแตน	Female	Mixed	12	Mass at mammary gland	Benign mixed mammary tumor	>8years	Mixed breed
423	2019	P6119547	CHM326	Canine	ขำขำ	Female	Pomeranian	6	Mass at mammary gland	Benign mixed tumor	≤8years	Purebred
424	2019	P6121580	CHM24	Canine	กุ้งกิ้ง	Female	Mixed	11	Mass at mammary gland	Simple tubular adenocarcinoma, grade 1	>8years	Mixed breed
425	2019	P6121595	CHM3	Canine	กีต้า	Female	Siberian	8	Mass at mammary gland	Solid carcinoma, grade 3	≤8years	Purebred
426	2019	P6223591	CHM122	Canine	แบมแบม	Female	Mixed	11	Mass at mammary gland	Simple tubular adenocarcinoma, grade 2	>8years	Mixed breed
427	2019	P6223629	CHM127/1	Canine	พูลทรัพย์1	Female	Mixed	15	Mass at mammary gland	Simple tubular adenocarcinoma, grade 2	>8years	Mixed breed
428	2019	P6224466	CHM176	Canine	ดำ	Female	Mixed	10	Mass at mammary gland	Anaplastic carcinoma	>8years	Mixed breed
429	2019	P6120816	CHM46	Canine	หมูตุ๋น	Female	Shitzu	11	Mass at mammary gland	Simple tubular adenocarcinoma	>8years	Purebred
430	2019	P6227909	CHM12	Canine	มะเขือ	Female	Beagle	10	Mass at mammary gland	Invasive tubular adenocarcinoma, grade 2	>8years	Purebred
431	2019	P6224489	D19-1063	Canine	เฮเลน	Female	Chihuahua	9	Mass at mammary gland	Solid carcinoma	>8years	Purebred
432	2019	P6222712	D19-0352	Canine	บุ้งกี๋	Female	Beagle	11	Mass at mammary gland	Mammary mixed tumor	>8years	Purebred
433	2019	P6223527	D19-0685	Feline	ชมพู่	Female	DSH	2	Mass at mammary gland	Simple mammary carcinoma (Tubular type)	≤8years	Mixed breed
434	2019	P6223866	D19-0802	Feline	ขาว	Female	DSH	7	Mass at mammary gland	Solid carcinoma	≤8years	Mixed breed
435	2019	P6223702	D19-0726	Canine	สไปรท์	Female	French Bulldog	5	Mass at mammary gland	Mammary mixed tumor	≤8years	Purebred
436	2019	P6222930	D19-0547	Feline	เหมียว	Female	DSH	13	Mass at mammary gland	Intraductal papillary adenoma	>8years	Mixed breed
437	2019	P6223071	D19-0655	Feline	แห้ง	Female	DSH	7	Mass at mammary gland	Simple carcinoma (tubular type)	≤8years	Mixed breed
438	2012	P5300750	D12-425	canine	Lily	Female	Poodle	2	skin mass	Atypical lipoma with panniculitis	≤8years	Purebred
439	2012	P5517904	D12-374	canine	หมี	Male	Mixed	2	Mass at right HL	Osteosarcoma	≤8years	Mixed breed
440	2012	P5518001	D12-393	canine	ดู๋	Male	Poodle	11	Mass at the right mandible	Malignant melanoma	>8years	Purebred
441	2012	P5518073	D12-394	canine	Prinzi	Female	Rottweiler	2	Mass in the lateral trunk	Liposarcoma	≤8years	Purebred
442	2012	P5416133	D12-340	canine	ซี่	Female	Poodle	8	Mass at ear canal	Squamous cell carcinoma	≤8years	Purebred
443	2012	P5517531	D12-373	canine	สีหมอก	Female	GR	9	skin mass at inguinal area	Fibrosarcoma	>8years	Purebred
444	2012	P5517099	D12-306	canine	ดิ้ดดี้	Male	Mixed		Mass at penis	Squamous cell carcinoma		Mixed breed
445	2012	P5306058	D12-307	canine	ฮานะ	Female	GR	6	Skin mass at metacarpal	Trichoepithelioma	≤8years	Purebred
446	2012	P5517667	D12-284	canine	ดำดี	Male	Mongrel	11	Skin mass	Fibrosarcoma	>8years	Purebred
447	2012	P5517491	D12-269	canine	ปุยฝ้าย	Female	Poodle	10	Intestine	Leiomyoma	>8years	Purebred
448	2012	P5517521	D12-270	canine	ปังปอนด์	Male	Shitzu	10	Testis	Seminoma	>8years	Purebred
449	2012	P5410311	D12-232	canine	ดุ๊กดิ๊ก	Female	Poodle	5	Mass at vagina	Fibroma	≤8years	Purebred
450	2012	P5517596	D12-283	canine	กาแฟ	Female	Mixed	7	Skin mass at right lateral trunk	Mast cell tumor grade 2	≤8years	Mixed breed
451	2012	P5517681	D12-285	canine	บุญชู	Male	Basset hound	7	Skin mass at dorsal part of thorax	Infiltrative lipoma	≤8years	Purebred
452	2012	P5517099	D12-224	canine	ดิ้ดดี้	Male	Mixed	15	Mass at prepuce	Squamous cell carcinoma	>8years	Mixed breed
453	2012	P5300580	D12-231	canine	ปลิว	Female	Mixed	8	Skin mass at dorsal part of thorax	Mast cell tumor grade 2	≤8years	Mixed breed
454	2012	P5516609	D12-198	canine	จีจี้	Female	Poodle	10	Mass at tongue	Lingual squamous cell carcinoma	>8years	Purebred
455	2012	P5517052	D12-182	canine	Lucky	Female	GR	5	Mass at right pinna	Trichoblastoma (ribbon type)	≤8years	Purebred
456	2012	P5517225	D12-197	canine	อ้วน	Male	Mixed	12	Skin mass	Mast cell tumor grade 2	>8years	Mixed breed
457	2012	P5517183	D12-200	canine	หมูหยอง	Male	Poodle	6	Skin mass at base of tail	Cystic trichoepithelioma	≤8years	Purebred
458	2012	P5517139	D12-196	canine	สม็อก	Male	Mixed		Mass at skin	Mast cell tumor grade 2		Mixed breed
459	2012	P4416788	D12-119	canine	สไปรท์	Male	Mixed	10	Skin mass at right FL	Squamous cell carcinoma	>8years	Mixed breed
460	2012	P5516438	D12-117	canine	กะปิ๋ว	Male	Miniature		Skin mass at right HL	Mast cell tumor grade 2		Purebred
461	2012	P5516646	D12-100	canine	มุม	Female	Mixed	9	Mass at left FL	Osteosarcoma	>8years	Mixed breed
462	2012	P5516531	D12-101	canine	กาโม่	Male	Mixed	12	Mass at dorsal trunk	Hemangiosarcoma	>8years	Mixed breed
463	2012	P5416324	D12-120	canine	โมเม	Female	Mixed	13	Subcutaneous mass at shoulder1	Squamous cell carcinoma with sebaceous gland hyperplasia	>8years	Mixed breed
464	2012	P5416324	D12-118	canine	โมเม	Female	Mixed	13	Subcutaneous mass at shoulder2	Lipoma	>8years	Mixed breed
465	2012	P5516505	D12-155	canine	เต้าหู้	Male	Mixed	10	Mass at digit	Sweat gland adenocarcinoma	>8years	Mixed breed
466	2012	P5411773	D12-154	canine	ลัคกี้	Male	Shitzu	9	Subcutaneous mass at shoulder	Squamous cell carcinoma (well differentiated)	>8years	Purebred
467	2012	P5304298	D12-048	canine	เท็ดดี้เเบร์	Male	Schnauzer	13	Skin mass at right palmar	Malignant fibrous histiocytoma(Anaplastic sarcoma with giant cells)	>8years	Purebred
468	2012	P5305741	55 B 081	canine	เทอร์โบ	Male	Mixed	11	Lower lip	Malignant melanoma	>8years	Mixed breed
469	2012	P5416251	D12-015	canine	เฉินหลง	Male	Mixed	15	Mass at left FL	Mast cell tumor grade 2	>8years	Mixed breed
470	2012	P5411708	D12-885	canine	น้ำตาล	Female	Mixed		Mass at base of ear	Sebaceous carcinoma		Mixed breed
471	2012	P5519849	D12-887	canine	Teddy	Female	Poodle	9	Mass at perianal area	Lipoma	>8years	Purebred
472	2012	P5519622	D12-777	canine	บราวนี่	Male	Poodle	17	Mass at upper lip	Hepatoid gland carcinoma	>8years	Purebred
473	2012	P5519640	D12-811	canine	เเต้ม	Female	Mixed	8	Skin mass at axillary area	Mast cell tumor grade 2	≤8years	Mixed breed
474	2012	P5519601	D12-810	canine	บ๊อบบี้	Male	GR		Mass at urinary bladder	Hemangiosarcoma		Purebred
475	2012	P5519622	D12-778	canine	บราวนี่	Male	Poodle	17	Mass at perianal area	Hepatoid gland carcinoma	>8years	Purebred
476	2012	P5519461	D12-746	canine	จิ๊กโก๋	Male	Cocker	10	Mass at liver	Liposarcoma	>8years	Purebred
477	2012	P5519030	D12-702	canine	จิ๋ว	Female	Poodle	8	Oral mass	Malignant melanoma	≤8years	Purebred
478	2012	P519030	D12-701	canine	จิ๋ว	Female	Poodle	8	Skin mass	Fibrosarcoma	≤8years	Purebred
479	2012	P5414306	D12-700	canine	จัมโบ้	Female	GR	7	Skin mass	Trichoepithelioma (cystic)	≤8years	Purebred
480	2012	P5414561	D12-717	canine	จิก	Female	Rottweiler	10	Skin mass	Malignant melanoma	>8years	Purebred
481	2012	P5519183	D12-695	canine	เจ๋อ	Female	Mixed	8	Skin mass	Squamous cell carcinoma	≤8years	Mixed breed
482	2012	P5300313	D12-666	canine	ลูกเต๋า	Male	Mixed	15	Mass at ventral part of tail	Perianal gland carcinoma	>8years	Mixed breed
483	2012	P5519163	D12-665	canine	กุ๊กไก่	Male	Miniature	7	Mass at dorsal part of tail	Perianal gland epithelioma	≤8years	Purebred
484	2012	P5517197	D12-639	canine	พริตตี้	Female	Poodle	9	Vaginal mass	Fibroma (Molle)	>8years	Purebred
485	2012	P5518700	D12-548	canine	หลง	Male	LR	6	Mass at left inguinal	Liposarcoma	≤8years	Purebred
486	2012	P5302642	D12-550	canine	เดียร์	Female	Poodle	11	Skin mass	Sebaceous adenoma	>8years	Purebred
487	2012	P5516505	D12-532	canine	เต้าหู้	Male	Mixed	10	Mass at lateral part of neck	Sweat gland adenocarcinoma	>8years	Mixed breed
488	2012	P5518555	D12-507	canine	ตัวเล็ก	Female	Shitzu	8	Mass at lower eyelid	Meibomian adenoma	≤8years	Purebred
489	2012	P5518787	D12-640	canine	Sunny	Female	LR	15	Mass at ear canal and skin	Sebaceous epithelioma	>8years	Purebred
490	2012	P5414818	D12-651	canine	ตัวใหม่	Male	Mixed	6	Mass at trunk and abdomen	Mast cell tumor grade 2	≤8years	Mixed breed
491	2012	P5517463	D12-604	canine	ซูโม	Male	Bangkaew	7	Testis	Seminoma	≤8years	Purebred
492	2012	P5518997	D12-611	canine	จูน	Female	Boxer	10	Skin mass	Fibroma	>8years	Purebred
493	2012	P5518973	D12-603	canine	นินจา	Female	Mixed	7	Skin mass	Lipoma	≤8years	Mixed breed
494	2012	P5408867	D12-595	canine	เเคบหมู	Male	Siberian Husky	6	Mass at frontal area of skull	Basal cell tumor	≤8years	Purebred
495	2012	P5518711	D12-549	canine	อะตอม	Female	GR	9	Skin mass	Squamous cell carcinoma	>8years	Purebred
496	2012	P5518303	D12-540	canine	โฮม	Male	Poodle	10	Mass at right axilla	Liposarcoma was highly suspected	>8years	Purebred
497	2012	P5518534	D12-505	canine	ชายกลาง	Male	Mixed	7	Skin mass	Hemangiomas	≤8years	Mixed breed
498	2012	P5517408	D12-485	canine	นิลกาฬ	Female	Poodle	12	Skin mass at left abdominal area	Trichobalstic carcinoma	>8years	Purebred
499	2012	P5518468	D12-483	canine	ครีม	Female	Mixed	9	Mass at foot pad of right HL	Schwannoma	>8years	Mixed breed
500	2012	P5518195	D12-444	canine	เจนนี่	Female	Mixed	12	Subcutaneous mass at inguinal area	Infiltrative lipoma	>8years	Mixed breed
501	2012	P5522602	D12-1616	feline	นุ้ย	Female	DSH	11	Skin mass at right axillary	Fibrosarcoma	>8years	Mixed breed
502	2012	P5522681	D12-1617	canine	จูเนียร์	Male	Pomeranian	6	Testis	Sertoli cell tumor	≤8years	Purebred
503	2012	P5522587	D12-1615	canine	ดอก	Male	Mixed	4	Testis	Sertoli cell tumor	≤8years	Mixed breed
504	2012	P5522674	D12-1632	canine	เก็กฮวย		LR		Skin mass	Mast cell tumor grade 2		Purebred
505	2012	P5517861	D12-1595	canine	หมูหยอง	Female	Shitzu		Skin mass	Squamous cell carcinoma		Purebred
506	2012	P5518195	55 B 2553	canine	เจนนี่		Mixed		Vaginal mass	Fibroma		Mixed breed
507	2012	P5517531	D12-1581	canine	สีหมอก	Female	GR	9	Mass at perianal area	Schwannoma		Purebred
508	2012	P5522515	D12-1594	canine	หมูปิ้ง	Female	Poodle		Mass at right baccal area	Malignant melanoma		Purebred
509	2012	P5522448	D12-1598	canine	น้องโคล่า	Male	Mixed		Skin mass	Fibrosarcoma		Mixed breed
510	2012	P5522336	D12-1548	feline	เด็กชายหมี	Male	DSH		Mass at buccal area	Amelanotic melanoma		Mixed breed
511	2012	P5522357	D12-1547	canine	ข้าวตอก	Male	Mongrel		Skin mass at neck	Squamous cell carcinoma		Purebred
512	2012	P5519498	D12-1367	canine	ไข่ป่าม	Female	Mixed	10	Skin mass at left thorax	Mast cell tumor grade 2	>8years	Mixed breed
513	2012	P5521583	D12-1373	canine	ยักษ์	Male	Pit Bull	10	Skin mass at ventral part of thorax	Mast cell tumor grade 2	>8years	Purebred
514	2012	P5303038	D12-1437	canine	เจเจ	Female	Pomeranian	10	Mass at vulva	Schwannoma	>8years	Purebred
515	2012	P5411525	D12-1368	canine	ส้มฉุน	Male	English cocker	7	Mass at ear pinna	Basosquamous cell carcinoma	≤8years	Purebred
516	2012	P5521930	D12-1439	canine	ฟางข้าว	Male	GR	9	Mass at right FL	Osteosarcoma	>8years	Purebred
517	2012	P5522089	D12-1505	canine	น้องกาเเฟ	Female	Mixed	8	Skin mass	Mast cell tumor grade 2	≤8years	Mixed breed
518	2012	P5521930	D12-1440	canine	ฟางข้าว	Male	GR	9	Lymph node	Lymph node metastasis was highly suspected	>8years	Purebred
519	2012	P5415873	D12-1435	canine	Lily	Male	Mixed	11 months	Skin mass at left thoracic area	Mast cell tumor grade 2	≤8years	Mixed breed
520	2012	P5521070	D12-1475	canine	แมงลัก	Female	Mixed	7	Mass at the right lumbar area	Malignant schwannoma	≤8years	Mixed breed
521	2012	P5522036	D12-1442	canine	ดอนล่า	Female	Poodle	9	Mass at ventral of abdomen	Osteosarcoma	>8years	Purebred
522	2012	P5520416	D12-1372	canine	โกโก้	Male	Cocker	8	Mass at dorsal wall of anus	Mucinous adrenocarcinoma	≤8years	Purebred
523	2012	P5521555	D12-1369	canine	ก๊อต	Male	Mixed	13	Mass at dorsal part of anus	Hepatoid gland adenoma	>8years	Mixed breed
524	2012	P5303103	D12-1268	canine	เเดง	Female	Mixed	13	Skin mass, lymph node	Mast cell tumor grade 2 with lymph node metastasis	>8years	Mixed breed
525	2012	P5521216	D12-1227	canine	โทนี่	Female	Cocker	9	Mass at vulva	Fibroma	>8years	Purebred
526	2012	P5521106	D12-1202	canine	มูมู่	Female	Poodle	12	Skin mass at vulva	Mast cell tumor grade 2	>8years	Purebred
527	2012	P5521664	D12-1328	canine	ข้าวโพด	Male	Mixed	13	Mass at digit	Fibrosarcoma	>8years	Mixed breed
528	2012	P5521525	D12-1307	canine	จู๋จี๋	Female	Mongrel	10	Skin mass at trunk	Tubulopapillary carcinoma	>8years	Purebred
529	2012	P5521373	D12-1266	canine	ตาล	Male	GR	10	Skin mass at neck	Fibrosarcoma	>8years	Purebred
530	2012	P5521421	D12-1267	canine	Tong	Female	Mixed	15	Skin mass at abdominal area	Hemangiosarcoma	>8years	Mixed breed
531	2012	P5303854	D12-1228	canine	ลักกี้	Female	Shitzu	8	Skin mass at ventral thorax	Mast cell tumor grade 2	≤8years	Purebred
532	2012	P5521043	D12-1200	canine	ตุ๊ต๊ะ	Male	Shitzu	6	Mass at right upper eyelid	Meibomian epithelioma	≤8years	Purebred
533	2012	P5520159	D12-1155	canine	หมิว	Female	Poodle	9	Mass at gum	Squamous cell carcinoma	>8years	Purebred
534	2012	P5521062	D12-1163	canine	บางกอก	Male	Bangkaew	7	Skin mass at neck	Plasmacytoma	≤8years	Purebred
535	2012	P5520335	D12-1083	canine	หลง	Female	Mixed	9	Valva mass	Fibroma (durum)	>8years	Mixed breed
536	2012	P5521498	D12-1291	canine	นำโชค	Male	Chow Chow	12	Mass at the ear	Osteosarcoma	>8years	Purebred
537	2012	P5520375	D12-986	canine	ไดโกโร่	Male	German Shepherd	9	Mass at metacarpal area	Osteosarcoma was suggestion	>8years	Purebred
538	2012	P5520731	D12-1075	canine	หมิ่มหมิ่ม	Female	Mixed	10	Mass at dorsal trunk	Hemangiomas	>8years	Mixed breed
539	2012	P5303916	55 B 1819	canine	ข้าวปั้น	Male	Shitzu	3	Nasal mass	Fibrosarcoma		Purebred
540	2012	P5520759	D12-1084	canine	ชินจัง	Male	Shitzu	7	Skin mass at the gum	Papilloma	≤8years	Purebred
541	2012	P5520775	D12-1096	canine	แก้ว	Male	GR	8	Mass at ventral trunk	Fibrosarcoma	≤8years	Purebred
542	2012	P5520834	D12-1116	canine	ฮ่องเต้	Male	GR	6	Mass at left lateral neck and ventral trunk	Hemangiomas	≤8years	Purebred
543	2012	P5520859	55 B 1898	canine	ลีโอ		Mixed		Oral mass	Acanthomatous epulis		Mixed breed
544	2012	P5520145	55 B 1861	canine	ไทเกอร์	Male	Mixed	8	Skin mass	Cutaneous histiocytoma		Mixed breed
545	2012	P5303916	D12-1064	canine	ข้าวปั้น	Male	Shitzu	3	Mass at nasal cavity	Plasma cell tumor	≤8years	Purebred
546	2012	P5520145	D12-1077	canine	ไทเกอร์	Male	Mixed	8	Skin mass	Mast cell tumor grade 2	≤8years	Mixed breed
547	2012	P5520267	D12-975	canine	Sasha	Female	Shitzu	6	Skin mass	Basal cell tumor	≤8years	Purebred
548	2012	P5520001	D12-976	canine	มดตะนอย	Male	Mixed	7	Skin mass	Squamous cell carcinoma	≤8years	Mixed breed
549	2012	P5520446	D12-988	feline	พลอย	Female	DSH	18	Skin mass at axillary and inguinal	Simple carcinoma	>8years	Mixed breed
550	2012	P5518734	D12-977	canine	พลอย	Female	Mixed	17	Skin mass at perianal area	Perianal gland epithelioma	>8years	Mixed breed
551	2012	P5306630	D12-923	canine	โอลีฟ	Female	Poodle	11	Uterine body	Leiomyoma	>8years	Purebred
552	2012	P5306630	D12-920	canine	โอลีฟ	Female	Poodle	11	Vaginal mass	Fibroma (Molle)	>8years	Purebred
553	2012	P5520094	D12-922	canine	ขนุน	Male	Bangkaew	3	Skin mass at ventral thorax	Mast cell tumor grade 2	≤8years	Purebred
554	2012	P5300753	D12-902	canine	เมล่อน	Male	GR	7	Mass at upper eyelid	Meibomian epithelioma	≤8years	Purebred
555	2012	P5516972	D12-893	canine	อู๋ไฉ้		Mixed		Mass at middle of tongue	Plasmacytoma with squamous cell metaplasia		Mixed breed
556	2012	P5519768	D12-886	canine	โมโม่		English cocker		Skin mass	Sebaceous gland adenoma		Purebred
557	2012	P5519305	D12-904	canine	มารวย	Male	Mixed	12	Mass at testis	Malignant interstitial cell tumor	>8years	Mixed breed
558	2012	P5516701	D12-921	canine	ทาโร่	Male	GR	12	Mass at neck	Sebaceous epithelioma	>8years	Purebred
559	2013	P5624636	D13-663	canine	แว่นแก้ว	female	bangkeaw	12	skin mass at trunk	Mast cell tumor was suspected	>8years	Purebred
560	2013	P5628252	D13-1522	canine	เบิร์ดเดย์	female	GR	9	mass at right perineal area	Basal cell carcinoma	>8years	Purebred
561	2013	P5628616	D13-1500	canine	บัดดี้	male	Cocker	7	mass at Lf. HL	Complex(Mixed) Aprocrine adenocarcinoma	≤8years	Purebred
562	2013	P5300408	D13-1666	canine	กังฟู	male	Poodle	4	Basal cell tumor	Basal cell tumor	≤8years	Purebred
563	2013	P5628669	D13-1664	canine	สแตมป์	male	Poodle	12	Perianal gland carcinoma	Perianal gland carcinoma	>8years	Purebred
564	2013	p5625664	D13-1693	canine	ลั่นทม	female	Dalmetian	15	Mass at the right HL (Inguinal area)	Squamous cell carcinoma	>8years	Purebred
565	2013	P5623669	D13-1379	canine	ลิลลี่	female	GR	7	skin mass	Hemangiomas	≤8years	Purebred
566	2013	P5628942	D13-1757	canine	บุญยืน	female	Poodle		skin mass at the left metatarsal area	Hemangioma		Purebred
567	2013	P5627765	D13-1573	canine	ไข่พะโล้	female	Cocker	10	mass at ear	Sebaceous epithelioma	>8years	Purebred
568	2013	P5300958	D13-1769	canine	ซูชิ	male	shitzu	7	kidney	Renal carcinoma was highly suspected	≤8years	Purebred
569	2013	P5628902	D13-1716	canine	ขนุน	male	Mixed	10	mass at ventral area of neck	Squamous cell carcinoma	>8years	Mixed breed
570	2013	P5412692	D13-1739	canine	มดเเดง	female	Poodle	11	skin mass	Mast cell tumors grade 2	>8years	Purebred
571	2014	P5522515	D14-122	canine	หมูปิ้ง	female	Poodle	16	Amelanotic melanoma	Amelanotic melanoma	>8years	Purebred
572	2013	P5623475	D13-129	feline	Lucky	male	DSH	10	skin mass at neck	Fibrosarcoma	>8years	Mixed breed
573	2013	P5623800	D13-225	canine	โคล่า	male	mixed	2	skin mass at metacarpal area	Fibroma	≤8years	Mixed breed
574	2013	P5623675	D13-191	canine	แพนด้า	female	LR	9	mass at soft palate	Malignant melanoma	>8years	Purebred
575	2013	P5623709	D13-186	canine	ชีโน่	female	mixed	5	skin mass at dorsal trunk	Benign peripheral nerve sheath tumor	≤8years	Mixed breed
576	2013	P5522984	56 B 387	canine	โจโจ้	female	spit	6	skin mass at trunk	Squamous papilloma, skin mass	≤8years	Purebred
577	2013	P5522367	D13-119	canine	จูดี้	female	mixed	8	mass in the left of perianal area	Hepatoid gland carcinoma	≤8years	Mixed breed
578	2013	P5414818	56 B 328	canine	ตัวใหม่	male	Mixed	8	skin perianal	mast cell tumor,low grade, skin mass	≤8years	Mixed breed
579	2013	P5624111	D13-280	canine	อุ๋งอิ๋ง	female	shitzu	8	mass at vagina	Leiomyoma	≤8years	Purebred
580	2013	P5303355	D13-279	canine	แฟนต้า	female	Saint Bernard	10	skin mass at ventral abdomen	Fibrosarcoma	>8years	Purebred
581	2013	P5516701	D13-206	canine	ทาโร่	female	GR	13	mass at tail	Hepatoid gland adenoma	>8years	Purebred
582	2013	P5623277	D13-192	canine	เฉาก๊วย	male	Mixed	5	skin mass	collagenous hamatoma	≤8years	Mixed breed
583	2013	P5624109	D13-281	canine	เเชมป์	female	pug	8	skin mass at ventral abdomen	Mast cell tumor grade 2	≤8years	Purebred
584	2013	P5518734	D13-291	canine	พลอย	female	Mixed	16	skin mass at abdomen	Mast cell tumor grade 2	>8years	Mixed breed
585	2013	P5518734	D13-291	canine	พลอย	female	Mixed	16	skin mass at right leg	Hemangioma	>8years	Mixed breed
586	2013	P5623460	D13-361	feline	คิงคอง	male	persian	7	mass at urethra	Adenocarcinoma	≤8years	Purebred
587	2013	P5300390	D13-294	canine	มะหมี่	female	Cocker	13	mass at inguinal mammary gland	Liposarcoma	>8years	Purebred
588	2013	P5304511	D13-269	canine	มาม่า	male	Poodle	8	skin mass at inguinal area	Squamous cell carcinoma	≤8years	Purebred
589	2013	P5411938	D13-270	canine	ซันนี่	female	Rott weiller	9	mass at second digit	Fibroplastic osteosarcoma	>8years	Purebred
590	2013	P5627839	D13-1397	canine	ฺBusy	female	shitzu	14	mass at ear pinna	Aprocrine adrenocarcinoma	>8years	Purebred
591	2013	P5627765	D13-1364	canine	ไข่พะโล้	female	Cocker	9	mass at ear	sebaceous epithelioma	>8years	Purebred
592	2013	P5627279	D13-1247	canine	สไปร์	female	Mixed	16	mass at head	Aprocrine adrenocarcinoma	>8years	Mixed breed
593	2013	P5626266	D13-1294	canine	คาร์เดีย	male	Mixed	14	mass at face	Squamous cell carcinoma	>8years	Mixed breed
594	2013	P5627736	D13-1390	canine	KY	male	Mixed	5	skin mass	Mast cell tumor grade 2	≤8years	Mixed breed
595	2013	P5628260	D13-1526	canine	มีมี่	female	LR	10	skin mass	Fibroma with angiomatosis	>8years	Purebred
596	2013	P5627826	D13-1301	canine	ฟรอนเทียร์	female	Rott weiller	12	mass at digit	malignant malenoma	>8years	Purebred
597	2013	P5301500	D13-1419	canine	ฟีโน่	female	Mixed	8	sternal cutaneous mass	Atypical lipoma with panniculitis	≤8years	Mixed breed
598	2013	P5302249	D13-1439	canine	โฮเล็ต	male	Mixed	6	testicular mass	Sertoli cell tumor	≤8years	Mixed breed
599	2013	P5627574	D13-1355	canine	น้องเจ้าขา	female	shitzu	14	skin mass	Infiltrative lipoma	>8years	Purebred
600	2013	P5302056	D3-1485	canine	นิล	female	Mixed	4	Bone	Histiocytic sarcoma was highly suspected	≤8years	Mixed breed
601	2013	P5628212	D13-1524	canine	ฮอนด้า	male	bangkeaw	8	spleen	Undifferentiated metastatic carcinoma	≤8years	Purebred
602	2013	P5625452	56 B 1267	canine	จิ๊บซี่		Mixed		subcutaneous mass	Lipoma		Mixed breed
603	2013	P5625306	D13-630	canine	Sketch	male	Mixed	7	skin mass	Benign peripheral nerve sheath tumor	≤8years	Mixed breed
604	2013	P5625314	56 B 1264	canine	CD		Mixed		urinary bladder mass	Transitional cell carcinoma		Mixed breed
605	2013	P5302155	D13-649	canine	พลอย	female	shitzu	9	mass at fourth phalanges	Sebaceous gland epithelioma	>8years	Purebred
606	2013	P5625411	D13-662	canine	น้ำตาล	female	bangkeaw	9	mass at right inter digit	Plasmacytoma	>8years	Purebred
607	2013	P5306086	D13-600	canine	ไทเกอร์	male	Mixed	14	skin mass	Sebaceous gland epithelioma	>8years	Mixed breed
608	2013	P5625185	D13-632	canine	เอ็ม	male	GR	4	skin mass at right mandible area	Trichoblastoma (Ribbon type)	≤8years	Purebred
609	2013	P5415005	D13-712	canine	บูบู้	male	shitzu	5	skin mass at head	Basal cell tumor	≤8years	Purebred
610	2013	P5625482	D13-733	canine	ทาโร่	male	Mixed	6	oral mass	Highly anaplastic tumor ( angiosarcoma )	≤8years	Mixed breed
611	2013	P5623675	D13-694	canine	แพนด้า	female	LR	10	oral mass	malignant malenoma	>8years	Purebred
612	2013	P5623214	D13-038	feline	หลง	female	DSH	10	skin mass	Adenocarcinoma	>8years	Mixed breed
613	2013	P5623100	D13-025	canine	โคล่า	male	Poodle	15	Testis	Seminoma with orchitis	>8years	Purebred
614	2013	P5522620	D13-001	canine	จิ๋ว	female	Mixed	7	skin mass	Hemangioma	≤8years	Mixed breed
615	2013	P5302491	D13-003	canine	บุญรอด	female	Thai ride back	9	skin mass	Canine hemangiopericytoma	>8years	Purebred
616	2013	P5302289	D13-015	canine	สตัง	female	Mixed	15	skin mass	Adenocarcinoma	>8years	Mixed breed
617	2013	P5623238	D13-055	canine	ลำดวน	female	Cocker	9	oral mass	Malignant melanoma (Spindle type)	>8years	Purebred
618	2013	P5306934	D13-075	canine	มุ่งมั่น	male	Mixed	7	skin mass	Fibrosarcoma	≤8years	Mixed breed
619	2013	P5522984	D13-039	canine	โจโจ้	female	spit	6	skin mass	Squamous cell carcinoma	≤8years	Purebred
620	2013	P5623159	D13-027	canine	ลินลี่	female	Mixed	12	skin mass	Sebaceous gland adenoma	>8years	Mixed breed
621	2013	P5623445	D13-113	canine	เข็มทอง	female	Mixed	10	skin mass at left tarsal joint	Hemangioma	>8years	Mixed breed
622	2013	P5414219	D13-116	canine	ลาล่า	female	LR	10	skin mass	Anaplastic carcinoma	>8years	Purebred
623	2013	P5623267	D13-053	canine	มะขาม	female	Mixed	9	mass at lower eyelid	melanoma	>8years	Mixed breed
624	2013	P5623299	D13-073	canine	เเหวน	female	Mixed		mass at left ear canal	Squamous cell carcinoma		Mixed breed
625	2013	P5623137	D13-089	canine	โอท็อป	male	Mixed	8	skin mass	Lipoma	≤8years	Mixed breed
626	2013	P5520092	D13-118	canine	น้องเพชร	male	GR	10	mass at digit	Plasmacytoma	>8years	Purebred
627	2013	P5623229	D13-090	canine	ลูกตาล	female	Mixed	14	mass around urethra	Sarcomatoid mesothelioma	>8years	Mixed breed
628	2013	P5623417	D13-092	canine	น้องเยี่ยม	female	Mixed	13	skin mass	Mast cell tumor grade 2	>8years	Mixed breed
629	2013	P5626462	D13-994	feline	น้อง	female	DSH	5	mass at right shoulder	fibrosarcoma	≤8years	Mixed breed
630	2013	P5304483	D13-877	canine	พลอย	female	Poodle	12	mass at liver	Hemangiosarcomas	>8years	Purebred
631	2013	P5626213	D13-919	canine	จิ๊กกี้	female	Mixed	12	skin mass	Sebaceous carcinoma	>8years	Mixed breed
632	2013	P5624376	D13-878	canine	ออโต้	male	Mixed	9	Bone	Osteosarcoma	>8years	Mixed breed
633	2013	P5518734	D13-1027	canine	พลอย	female	Mixed	17	skin mass	Mast cell tumor grade 2	>8years	Mixed breed
634	2013	P5519911	D13-1068	canine	วอลโว่	female	bull dog	10	mass	fibrosarcoma	>8years	Purebred
635	2013	P5626539	D13-1029	canine	ฮิปปี้	male	Mixed	13	mass at spleen	Hemangiosarcomas	>8years	Mixed breed
636	2013	P5625482	D13-1054	canine	ทาโร่	male	Mixed	6	mass at gum	Fibroma	≤8years	Mixed breed
637	2013	P5626336	D13-960	canine	Benji	male	Mixed	10	mass at right FL	Osteosarcoma	>8years	Mixed breed
638	2013	P5520933	D13-958	canine	ดิ๋ง	female	Mixed	11	skin mass	Infiltrative lipoma	>8years	Mixed breed
639	2013	P5626610	D13-1053	canine	มูมู่	female	bangkeaw	6	skin mass	mast cell tumor grade 3	≤8years	Purebred
640	2013	P5301104	D13-1086	canine	แคบหมู	female	GR		mass at head	Basal cell tumor		Purebred
641	2013	P5626633	D13-1052	canine	โตโต	male	GR		mass at ear	Ceruminous cystadenoma		Purebred
642	2013	P5623995	D13-1037	canine	สีสวาท	female	Chihuahua	14	uterine body mass	Leiomyoma	>8years	Purebred
643	2013	P5520681	D13-1036	canine	Sydney	female	Mixed		skin mass	mast cell tumor grade 1		Mixed breed
644	2013	P5626183	D13-959	canine	บราวนี่	female	Poodle	13	axillary lymph node	carcinoma metastasis	>8years	Purebred
645	2013	P5626468	D13-995	canine	ตัวเล็ก	female	Mixed	11	skin mass at left HL	fibrosarcoma	>8years	Mixed breed
646	2013	P5626154	D13-920	canine	มูมู่	female	Mixed	9	skin mass	mast cell tumor grade 3	>8years	Mixed breed
647	2013	P5626297	D13-939	canine	โคโค่	female	Bull terrier	6	mass at gum	Osteosarcoma	≤8years	Purebred
648	2013	P5625693	D13-1121	canine	ข้าวเหนียว	female	Mixed	7	mass at left ear pinna	Plasma cell tumor	≤8years	Mixed breed
649	2013	P5626895	D13-1132	canine	เอมมิลี	female	Beagle	8	skin mass	Hemangioma	≤8years	Purebred
650	2013	P5624244	D13-359	canine	สมปอง	female	bull dog	6	skin mass	Mast cell tumor grade 2	≤8years	Purebred
651	2013	P5624160	D13-360	canine	ของชอบ	male	German Shepherd	7	oral mass	fibrosarcoma	≤8years	Purebred
652	2013	P5626526	D13-1028	canine	ถุงทอง	male	Mixed	9	mass at perianal area	Perianal gland epitheliona	>8years	Mixed breed
653	2013	P5623350	D13-363	canine	จูน	female	Mixed	14	skin mass	Mast cell tumor grade 2	>8years	Mixed breed
654	2013	P5624290	D13-362	canine	เบ็นจี้	male	Mixed	14	Mass at the perinal area	​Hepatoid gland carcinoma	>8years	Mixed breed
655	2013	P5624461	D13-431	canine	สีนวล	female	Mixed	13	mass in the urinary bladder	Transitional cell carcinoma	>8years	Mixed breed
656	2013	P5624333	D13-320	canine	น้องหมอก	male	Mixed		skin mass	Squamous cell carcinoma		Mixed breed
657	2013	P5624214	D13-388	canine	โต	male	GR	7	skin mass	Fibrosarcoma	≤8years	Purebred
658	2013	P5624486	D13-386	canine	เล็กน้อย	female	Poodle	6	skin mass	Sebaceous gland adenoma	≤8years	Purebred
659	2013	P5624436	D13-394	canine	เเฟนซี	female	German Shepherd	1	skin mass at mandible area	Fibrosarcoma	≤8years	Purebred
660	2013	P5624106	D13-319	canine	ทึ่ม	Male	Mixed	10	mass at anus	Adenocarcinoma	>8years	Mixed breed
661	2013	P5623958	D13-262	canine		female	Poodle	7	mass at left perineal area	Schwannoma	≤8years	Purebred
662	2013	P5624621	D13-454	canine	ปิ๊ดปี๋	female	Mixed	8	skin mass	Cutaneous histiocytoma	≤8years	Mixed breed
663	2013	P5300390	D13-451	canine	มะหมี่	female	Cocker	13	mass at right ear	sebaceous epithelioma	>8years	Purebred
664	2013	P5300434	D13-473	canine	กาแฟ	male	Poodle	8	mass at perianal area	Hepatoid gland carcinoma	≤8years	Purebred
665	2013	P5624366	D13-414	canine	ทูเช่	male	Mixed	9	mass at perianal area	Hepatoid gland carcinoma	>8years	Mixed breed
666	2013	P5624864	D13-575	canine	อิ๊กคิว	male	Mongrel	13	mass at digit	Fibrosarcoma	>8years	Purebred
667	2013	P5624648	D13-534	canine	นำลาภ	male	Mixed	10	skin mass	Mast cell tumor grade 2	>8years	Mixed breed
668	2013	P5624808	D13-511	canine	เเปปซี่	female	Mongrel	5	skin mass	Mast cell tumor grade 2	≤8years	Purebred
669	2013	P5306685	D13-453	canine	คุกกี้	female	Cocker	9	mass at lower eyelid	Meibomian epithelioma	>8years	Purebred
670	2013	P5624602	D13-551	canine	White	male	Mixed	10	skin mass	Hemangiosarcomas	>8years	Mixed breed
671	2013	P5624648	D13-535	canine	Mixed	male	Mixed	10	skin mass	Hemangioma	>8years	Mixed breed
672	2013	P5625076	D13-599	canine	โอเด็ต	female	Cocker	5	mass in abdominal cavity	Mesothelioma	≤8years	Purebred
673	2013	P5624510	D13-413	canine	ขี้ฝุ่น	male	LR	3	subcutaneous mass	Lipoma	≤8years	Purebred
674	2013	P5517860	D13-415	canine	ทุเรียน	male	Beagle	1	mass	papilloma	≤8years	Purebred
675	2013	P5522880	D13-430	canine	จอซ	male	Mixed	13	nasal mass	Fibrosarcoma was suspected	>8years	Mixed breed
676	2013	P5624665	D13-455	canine	กิ๊ก	male	Mixed	12	mass at prepuce	Sabaceous gland adenoma	>8years	Mixed breed
677	2013	P5416256	D13-1356	canine	เชรี่	female	GR	11	nasal mass	Adenocarcinoma	>8years	Purebred
678	2013	P5300342	D13-1173	canine	ลำดวน	female	Cocker	5	mass at buccal cavity	fibrosarcoma	≤8years	Purebred
679	2013	P5522937	D13-1587	canine	โจอี้	male	Poodle	10	mass at foot pad	Liposarcoma	>8years	Purebred
680	2013	P5625607	D13-1444	canine	วิกกี้	female	Rott weiller	4	Bone	Osteosarcoma was highly suspected	≤8years	Purebred
681	2013	P5627453	D13-1523	canine	โมจิ	female	Rott weiller	9	mass at left HL	Squamous cell carcinoma	>8years	Purebred
682	2013	P5627825	D13-1458	canine	เจโร	female	shitzu	10	mass at left shoulder	Fibroma	>8years	Purebred
683	2013	P5625797	D13-831	canine	กวาง	female	Mixed	11	skin mass	Mast cell tumor grade 2	>8years	Mixed breed
684	2013	P5625527	D13-710	canine	ยิปซี	male	pug	4	skin mass	Infiltrative lipoma	≤8years	Purebred
685	2013	P5625535	D13-711	canine	เปียกปูน	male	Poodle	14	mass at lip	Trichoblastoma	>8years	Purebred
686	2013	P5625944	D13-844	canine	รวงข้าว	female	GR	8	mass at mandible	Pseudocarcinoma hyperplasia	≤8years	Purebred
687	2013	P5625726	D13-772	canine	จุ่น	female	Mixed	9	mass at vagina	Fibroleiomyoma	>8years	Mixed breed
688	2013	P5625808	D13-815	canine	หมี	male	Mixed	10	mass at ear pinna	Basal cell tumor	>8years	Mixed breed
689	2013	P5302415	D13-816	canine	ซอมภอ	female	LR	6	mass at nipple	Sebaceous carcinoma	≤8years	Purebred
690	2013	P5520759	56 B 1451	canine	ชินจัง		Mixed		gingival mass	Acanthomathus epulis with mild lympho-plasmacytic gingivitis		Mixed breed
691	2013	P5625984	D13-851	canine	ศรีนวล	female	Mixed	5	skin mass	Apocrine ductular carcinoma	≤8years	Mixed breed
692	2013	P5300221	D13-858	canine	ปุยนุ่น	male	Poodle	12	skin mass	sebaceous epithelioma	>8years	Purebred
693	2013	P5625913	D13-859	canine	ดุ๊กดิ๊ก	male	Mixed	11 mo	Bone	Osteochondroma was highly suspeected	≤8years	Mixed breed
694	2013	P5625777	D13-782	canine	กลอเรีย	female	GR	9	mass at lumbar	Basosquamous cell carcinoma	>8years	Purebred
695	2013	P5625607	D13-752	canine	วิกกี้	female	Rott weiller	11	mass at digit	malignant malenoma	>8years	Purebred
696	2013	P5522602	D13-781	Feline	นุ้ย	female	DSH	11	skin mass	Fibrosarcoma	>8years	Mixed breed
697	2013	P5625743	D13-783	canine	โอโม่	female	Mixed	10	mass at inguinal	Squamous cell carcinoma	>8years	Mixed breed
698	2013	P5626152	D13-921	canine	ดุ๊กดิ๊ก	female	GR	7	skin mass at HL	Mast cell tumor grade 2	≤8years	Purebred
699	2013	P5624636	D13-925	canine	เเว่นเเก้ว	female	Chow Chow	12	skin mass	Liposarcoma	>8years	Purebred
700	2013	P5627057	D13-1157	canine	ขี้ต่าว	female	Mixed	9	skin mass	mast cell tumor grade 1	>8years	Mixed breed
701	2013	P5415230	D13-1051	canine	มาม่า	Male	Mixed	13	mass at perianal area	complex(mixed) aprocrine adenocarcinoma	>8years	Mixed breed
702	2013	P5626838	D13-111	canine	กีวี่	female	Mixed	7	skin mass at thoracic area	Osteosarcoma	≤8years	Mixed breed
703	2013	P5626965	D13-1174	canine	อดัม	female	Mixed	14	mass at the right lateral body	Myxoid Liposarcoma	>8years	Mixed breed
704	2013	P5627193	D13-1201	canine	มาร์กี้	female	LR	1	mass at the left lateral abdomen	Liposarcoma	≤8years	Purebred
705	2013	P5414818	D13-1329	canine	ตัวใหม่	Male	bangkeaw	7	skin mass	Mast cell tumor grade 2	≤8years	Purebred
706	2013	P5627098	D13-1310	canine	โมโม่	Male	Mixed	8	mass at perianal area	Perianal gland epitheliona	≤8years	Mixed breed
707	2013	P5627029	D13-1248	canine	มอลลี่	female	Saint Bernard	5	skin mass	Infiltrative lipoma	≤8years	Purebred
708	2013	P5520381	D13-1143	canine	ชายกลาง	Male	Mixed	11	mass at the left mandible	ฺBasal cell tumor	>8years	Mixed breed
709	2013	P5617598	D13-1328	canine	คิว	Male	Thai ride back		mass at submandibular area	mast cell tumor grade 3		Purebred
710	2013	p6622937	D13-1293	canine	โจอี้	Male	Poodle	10	mass at digit	Liposarcoma	>8years	Purebred
711	2013	P5522111	D13-1457	canine	สามล้อ	female	Mixed	14	skin mass	Hemangiopericytoma	>8years	Mixed breed
712	2013	P5305933	D13-1296	canine	บูบู	Male	Mixed	12	mass at perianal area	Perianal gland carcinoma	>8years	Mixed breed
713	2013	P5305933	D13-1295	canine	บูบู	Male	Mixed	12	mass at perianal area	Perianal gland carcinoma	>8years	Mixed breed
714	2013	P5627313	D13-1292	canine	ทาโร่	Male	Chihuahua	10	mass at perianal area	Perianal gland carcinoma	>8years	Purebred
715	2013	P5627453	D13-1395	canine	โมจิ	female	Rott weiller		mass at the left HL	Squamous cell carcinoma		Purebred
716	2013	P5626212	56 B 2767	canine	รถโฟร์ค		Mixed			adenocarcinoma with lymph node metastasis		Mixed breed
717	2013	P5627870	D13-1557	canine	ไมโล	Male	Yorkshire Terrier	9	skin mass	Mast cell tumor grade 2	>8years	Purebred
718	2013	P5628111	D13-1605	canine	น้ำผึ้ง	female	Cocker	11	skin mass	Hemangioma	>8years	Purebred
719	2013	P5625200	D13-1556	canine	ปุ๊กกี้	female	GR	8	spleen	Hemangiopericytoma	≤8years	Purebred
720	2013	P5625954	D13-1473	canine	รุงรัง	male	Mixed	5	mass 1	Melanocytoma-acanthoma	≤8years	Mixed breed
721	2013	P5625954	D13-1473	canine	รุงรัง	male	Mixed	5	mass 2	Trichoblastoma	≤8years	Mixed breed
722	2013	P5628132	56 B 2787	canine	เเหม่ม	female	GR	5	skin mass	Mast cell tumor , low grade	≤8years	Purebred
723	2013	P5628132	D13-1499	canine	เเหม่ม	female	GR	5	skin mass	Mast cell tumor grade 2	≤8years	Purebred
724	2013	P5626959	56 B 2645	canine	Casper		Mixed		skin mass	Simple tubular adenocarcinoma, originated from aprocrine gland		Mixed breed
725	2013	P5626959	D13-1396	canine	Casper	male	Mixed	11	mass at neck area	Aprocrine adrenocarcinoma was highly suggestion	>8years	Mixed breed
726	2013	P5625437	D13-708	canine	เสือ	male	Mixed	8	skin mass	Mast cell tumor grade 2	≤8years	Mixed breed
727	2013	P5625581	D13-725	canine	นุ่น	female	Mixed	9	mass at left inguinal area	Squamous cell carcinoma	>8years	Mixed breed
728	2013	P5300735	D13-1681	canine	candy	female	German Shepherd	8	skin mass	Basal cell carcinoma	≤8years	Purebred
729	2013	P5627904	D12-1599	canine	เต้าฮวย	male	GR	4 mo	mass at madibular bone	Osteosarcoma	≤8years	Purebred
730	2013	P5625229	D13-1226	canine	คุ้กกี้	female	GR	6	mass at lower lip	melanoma	≤8years	Purebred
731	2014	P5729353	D14-061	canine	โคล่า	Male	Poodle	11	Gingival mass	Mast cell tumor grade 1 was highly suspect with chronic inflmammation	>8years	Purebred
732	2014	P5629108	D14-008	canine	โบอิ้ง	Male	Pomeranian	13	Mass at left FL	Aprocrine adenoma	>8years	Purebred
733	2014	P5629107	D14-200	canine	มีมี่	Female	Poodle	8	Skin mass (inguinal area)	Lipoma	≤8years	Purebred
734	2014	P5627825	D14-183	canine	เจโร	Female	Shitzu	10		Fibrosarcoma	>8years	Purebred
735	2014	P5627870	57 CB 11	canine	ไมโล	Male	Yorkshire Terrier	9	skin mass	Mast call tumor, low grade	>8years	Purebred
736	2014	P5628132	D14-143	canine	เเหม่ม	Female	GR	5	skin mass (Right axillary area)	Mast cell tumor grade 2	≤8years	Purebred
737	2014	P5627870	D14-066	canine	ไมโล	Male	Yorkshire Terrier	9	skin mass	Mast cell tumor grade 2	>8years	Purebred
738	2014	P5301890	D14-263	canine	ไมโล	Male	Mongrel	10	skin mass (axillary area)	Lipoma	>8years	Purebred
739	2014	P5730085	D14-303	canine	ซูโม่	Male	Bull dog	7	Mass at tail	Perianal gland adenoma	≤8years	Purebred
740	2014	P5730124	D14-292	canine	โม่	Male	Shitzu	7	Mass at perianal area	Perianal gland epithelioma	≤8years	Purebred
741	2014	P5729757	D14-202	canine	ซาไก	Male	Mixed	9	skin mass (ear pinna)	Squamous cell carcinoma	>8years	Mixed breed
742	2014	P5729403	D14-286	canine	หมี	Male	Mixed	2	nasal mass	Atypical TVT was highly suspected	≤8years	Mixed breed
743	2014	P5625797	D14-311	canine	กวาง	Female	Mixed	11	Mass at neck area	Hemangiosarcoma	>8years	Mixed breed
744	2014	P5626896	D14-393	canine	บอม	Male	Shitzu	7	Mass at right conjunctiva	Squamous papilloma with pseudocarcinomatous epithelial hyperplasia	≤8years	Purebred
745	2014	P5626896	D14-393	canine	บอม	Male	Shitzu	7	Mass at right upper eyelid	Meibomian gland carcinoma	≤8years	Purebred
746	2014	P5414961	D14-354	canine	ฟูฟู	Male	Samoyed	10	Mass at right lower eyelid	Meibomian adenoma	>8years	Purebred
747	2014	P5414926	D14-049	canine	ฟ้าใส	Female	Shitzu	2	Umbilical mass	Lipoma	≤8years	Purebred
748	2014	P5729308	D14-040	canine	จิ้นเจอร์	Female	Mixed	8	Skin mass (Frontal skull)	Multilobular tumor of bone	≤8years	Mixed breed
749	2014	P5731021	D14-570	canine	ร็อคกี้	Male	LR	13	Mass at left HL	Osteosarcoma(giant cell type)	>8years	Purebred
750	2014	P5730540	D14-413	canine	ติ๊ดตี่	Female	Mixed	14	Skin mass (Right scapular)	Follicular harmatoma with mild degree of dermatitis	>8years	Mixed breed
751	2014	P5730171	D14-340	canine	นีน่า	Female	GR	12	Skin mass (right 4th digit)	Mast cell tumor grade 2	>8years	Purebred
752	2014	P5729650	D14-160	canine	จิ๊กโก๋	Male	Mixed		Bone	Osteosarcoma (osteoblastic)		Mixed breed
753	2014	P5729707	D14-158	canine	เเรมโบ้	Male	Poodle	15	Bone	Osteosarcoma (Telangiectatic type)	>8years	Purebred
754	2014	P5729226	D14-039	canine	หมูปิ้ง	Female	Shitzu	9	Mass at right FL	Acantholytic squamous cell carcinoma with sebaceous hyperplasia	>8years	Purebred
755	2014	P5627755	D14-360	canine	ปุ้มปุ้ย	Male	Mixed	9	Perianal mass	Perianal gland carcinoma	>8years	Mixed breed
756	2014	P5517408	D14-342	canine	นิลกาฬ	Female	Poodle	14	Mass at left FL	Hemangiopericytoma	>8years	Purebred
757	2014	P5730054	D14-262	canine	พีพี	Male	Mixed	10	skin mass(Abdominal area)	Sebaceous adenoma with pyogranulomatous dermatitis	>8years	Mixed breed
758	2014	P5729792	D14-195	canine	ดุ๊กดิ๊ก	Female	Shitzu	7	mass at vulva	Leiomyoma	≤8years	Purebred
759	2014	P5729512	D14-097	canine	ถุงทอง	Female	GR	10	Bone	Osteosarcoma (fibroblastic ) was highly suspected	>8years	Purebred
760	2014	P5626965	D14-299	canine	อดัม	Female	Mixed	15	mass at ventral of trunk	Liposarcoma	>8years	Mixed breed
761	2014	P5730122	D14-310	canine	น้ำหวาน	Female	Poodle	15	Skin mass (inguinal area)	Infiltrative lipoma	>8years	Purebred
762	2014	P5729891	D14-218	canine	ฟูฟู	Male	Mixed	11	Mass at right upper eyelid	Meibomian epithelioma	>8years	Mixed breed
763	2014	P5518943	D14-2203	canine	บาบู	Male	Pomeranian	7	Scrotal and testicular mass	Sertoli cell tumor	≤8years	Purebred
764	2014	P5306982	D14-2247	canine	บาบูน	Male	Mixed	11	skin mass	Fibrosarcoma	>8years	Mixed breed
765	2014	P5734383	D14-1819	canine	ปีโป้	Male	Chow Chow	5	Oral mass	Melanoma	≤8years	Purebred
766	2014	P5734152	D14-1648	canine	จูล้ง	Male	Mixed	13	Liver and splenic mass	Hemangiosarcoma	>8years	Mixed breed
767	2014	P5731711	D14-1103	canine		Male	Mixed	10	Mass at right eyelid	Cutaneosu histiocytoma	>8years	Mixed breed
768	2014	P5733410	D14-1338	canine	ลูกหว้า	Female	Mixed	12	Mass at right upper eyelid	Mast cell tumor grade 2	>8years	Mixed breed
769	2014	P5734736	D14-1777	canine	น้องขิม	Female	GR	8	Skin mass (Lateral trunk)	Lipoma	≤8years	Purebred
770	2014	P5734852	D14-1804	canine	Liliy	Female	GR	8	mass at vulva	Leiomyoma	≤8years	Purebred
771	2014	P5733808	D14-1489	canine	โอวัลติน	Female	Thai Ridgeback	5	Skin mass (inguinal area)	Apocrine adenocarcinoma	≤8years	Purebred
772	2014	P5517792	D14-1818	canine	เลย์	Male	GR	11	Mass at HL	Melanoma	>8years	Purebred
773	2014	P5302869	D14-2173	feline	ดำ	Female	DSH	11	Mass in abdominal cavity	Adenocarcinoma metastasis	>8years	Mixed breed
774	2014	P5730537	D14-462	canine	หน้าหวาน	Male	Mixed	6	Mass at left FL	Apocrine adenocarcinoma	≤8years	Mixed breed
775	2014		D14-1337	canine	แฮร์รี่	Male	Cocker	11	Mass at perianal area	Perianal gland adenoma	>8years	Purebred
776	2014	P5522515	D14-1860	canine	หมูปิ้ง	Female	Poodle		Mass at upper lip	Melanoma		Purebred
777	2014	P5517792	D14-1376	canine	เลย์	Male	GR	11	Mass at phalangx	Melanoma	>8years	Purebred
778	2014	P5628470	D14-1843	feline	Peper	Male	DSH	17	mass at left and right lateral trunk	Osteosarcoma, MCT	>8years	Mixed breed
779	2014	P5723399	D14-1157	canine	มินนี่	Female	Beagle	4 mo	Oral mass	Papilloma	≤8years	Purebred
780	2014	P5304678	D14-2046	canine	นาเดีย	Female	Yorkshire Terrier	9	Skin mass (Lumbar area)	Sevaceous epithelioma	>8years	Purebred
781	2014	P5735202	D14-2209	canine	เเม็กกี้	Female	Mixed	9	mass at Left FL	Infiltrative lipoma	>8years	Mixed breed
782	2014	P5838507	D15-0728	canine	โดโด้	Male	Mixed	15	Submandibular mass	Amelanotic melanoma	>8years	Mixed breed
783	2014	P5734746	D14-1797	canine	ไมโล	Female	Mixed	10	skin mass(Abdominal area)	Lipoma	>8years	Mixed breed
784	2014	P5734907	D14-1812	canine	ถุงหยก	Female	Cocker	10	Mass at uterus and vulva	Leiomyoma	>8years	Purebred
785	2014	P5731126	D14-1731	canine	บุ๋งกี้	Female	Mixed			ฺBasal cell tumor		Mixed breed
786	2014	P5520566	D14-1365	canine	เต้าหู้	Female	GR	13	Ovarian mass	Theca cell tumor	>8years	Purebred
787	2014	P5625200	D14-1248	canine	ปุ๊กกี้	Female	GR	9	Skin mass	Osteosarcoma	>8years	Purebred
788	2014	P5628130	D14-1861	canine	บิ๊ก	Male	Pit bull	5	Cecum	Leiomyoma was highly suspected	≤8years	Purebred
789	2014	P5840967	D14-1997	canine	ดัมมี่	Male	Mixed	11	Skin mass	Basosquuamous carcinoma	>8years	Mixed breed
790	2014	P5736380	D14-2214	canine	หูกวาง	Female	Mixed	10	Skin mass	Mast cell tumor grade 2	>8years	Mixed breed
791	2014	P5735920	D14-2149	canine	จ๋อมแจ๋ม	Male	GR	9	Skin mass (shoulder)	Infiltrative lipoma with dilated pore and sebaceous hematoma	>8years	Purebred
792	2014	P5735849	D14-2246	canine	โจ	Male	Mixed	13	mass at prepuce	mast cell tumor grade 3	>8years	Mixed breed
793	2014	P5735852	D14-2229	canine	บราวด์	Female	Mixed	8	mass at inguinal area	Mast cell tumor grade 2	≤8years	Mixed breed
794	2014	P5736207	D14-2208	canine	ซินดี้	Female	Mixed	8	mass at distal part of left ulna	Chondroma	≤8years	Mixed breed
795	2014	P5731914	D14-932	canine	เซเว่น	Male	Shitzu	8	mass at mandible	Squamous cell carcinoma	≤8years	Purebred
796	2014	P5623391	D14-749	canine	กล้วยไข่	Female	Shitzu	8	Mass at perianal area	Basal cell carcinoma	≤8years	Purebred
797	2014	P5731714	D14-750	canine	มอมเเมม	Male	Shitzu	1	Mass at perianal area	Perianal gland adenoma	≤8years	Purebred
798	2014	P5625797	D14-948	canine	กวาง	Female	Thai Ridgeback	12	Mass at cervical area	Mast cell tumor grade 2	>8years	Purebred
799	2014	P5732021	D14-862	canine	อังเปา	Male	Mixed	9	Mandibular nodule	Squamous cell carcinoma	>8years	Mixed breed
800	2014	P5522367	D14-873	canine	จูดี้	Female	Mixed	7	mass at spleen	carcinoma metastasis	≤8years	Mixed breed
801	2014	P5522367	D14-876	canine	จูดี้	Female	Mixed	7	mass at liver	carcinoma metastasis	≤8years	Mixed breed
802	2014	P5522367	D14-874	canine	จูดี้	Female	Mixed	7	Mass at perianal area	anal sac gland carcinoma	≤8years	Mixed breed
803	2014	P5730141	D14-626	canine	มดดำ	Female	Mixed	10	Skin mass	Mast cell tumor grade 2	>8years	Mixed breed
804	2014	P5730683	D14-457	canine	คิตตี้	Female	Pomeranian	3	Muscular infiltative mass	Osteosarcoma	≤8years	Purebred
805	2014	P5517566	D14-532	canine	ก๊วยเจ๋ง	Male	Poodle		Skin mass	Squamous cell carcinoma		Purebred
806	2014	P5301614	D14-673	canine	สังขยา	Female	GR	9	Skin mass	Sebaceous carcinoma	>8years	Purebred
807	2014	P5730917	D14-690	canine	จีจี้	Female	GR	8	Lymph node	Lymphoma	≤8years	Purebred
808	2014	P5731488	D14-674	canine	กีตาร์	Female	LR	6	Mass at perianal area	Perianal gland adenoma	≤8years	Purebred
809	2014	P5730855	D14-499	canine	ซุปเปอร์	Male	Poodle	5	nasal mass	Undifferentiated carcinoma	≤8years	Purebred
810	2014	P5730918	D14-531	canine	เกาลัด		Mixed	17	mass at inner ear	Ceruminous cystadenoma	>8years	Mixed breed
811	2014	P5731752	D14-754	canine	ปั๊ก	Female	Pug	14	skin mass at left sholder	Mast cell tumor grade 2	>8years	Purebred
812	2014	P5731265	D14-628	canine	โจ	Female	LR	10	Skin mass at abdominal area	Collagenous harmatoma with mild degree of dermatitis	>8years	Purebred
813	2014	P5410570	D14-609	canine	ป๊อปแป๊ป	Female	Mixed	13	Mass at vagina	Fibroma (durum)	>8years	Mixed breed
814	2014	P5729509	D14-456	canine	บลาวดี้	Male	Alsatian	11	mass at inguinal area	Malignant trichoepithelioma	>8years	Purebred
815	2014	P5730608	D14-458	canine	ชาร์คกี้	Female	Mixed	10	Mass at perianal area	Complex (mixed) Apocrine adenocarcinoma	>8years	Mixed breed
816	2014	P5301473	D14-490	canine	ดุ๊กดิ๊ก	Female	Miniature	13	Mass at lateral trunk	Liposarcoma	>8years	Purebred
817	2014	P5517392	D14-506	canine	จิงจิง	Female	Mixed	2	vaginal mass	TVT(Transmissible venereal tumor)	≤8years	Mixed breed
818	2014	P5626266	D14-491	canine	คาร์เดีย	Male	Mixed	14	Mass at right ear pinna	Plasma cell tumor	>8years	Mixed breed
819	2014	P5409615	D14-530	canine	Mickey	Male	Cocker	12	Mass at left HL	Basal cell tumor	>8years	Purebred
820	2014	P5522515	D14-569	canine	หมูปิ้ง	Female	Poodle	16		Amelanotic melanoma	>8years	Purebred
821	2014	P5306736	D14-492	canine	มอคค่า	Male	Mixed	7	Mass at perianal gland	Perianal gland carcinoma	≤8years	Mixed breed
822	2014	P5522111	D14-590	canine	Happy	Female	GR	8	Mass at humerus	Periosteal chondrosarcoma	≤8years	Purebred
823	2014	P5729757	D14-592	canine	ซาไก	Male	Mixed	9	Skin mass at pinna	Squamous cell carcinoma	>8years	Mixed breed
824	2014	P5517874	D14-624	canine	Ralph	Male	Mixed	6	mass at prepuce	Hemangiosarcoma	≤8years	Mixed breed
825	2014	P5730703	D14-655	canine	ตุ๊กตุ๋น	Male	Mixed	15	mass at ventral of trunk	Mast cell tumor grade 2	>8years	Mixed breed
826	2014	P5731785	D14-755	canine	กาแฟ	Male	Shitzu		Chronic wound at tail	Granulation tissue-type hemangioma with pseudocarcinomatous epidermal hyperplasia		Purebred
827	2014	P5731972	D14-847	canine	นิล	Male	Mixed	6	Mass at perianal area	Hemangioma was highly suspected	≤8years	Mixed breed
828	2014	P5731214	D14-627	canine	แอร์เม	Female	Shitzu	8	vaginal mass	Fibrosarcoma	≤8years	Purebred
829	2014	P5731228	D14-610	canine	Big	Female	German Shepherd	7	Mass at mandibular symphysis	Acanthomatous ameloblastoma (Acanthomatous epulis)	≤8years	Purebred
830	2014	P5739650	D14-436	canine	ตัวยุ่ง	Male	French bulldog	9	Testicular mass	Mast cell tumor grade 2	>8years	Purebred
831	2013	P5306479	D13-1717	canine	ฟีฟ่า	Male	Beagle	3	Skin mass	Papilloma	≤8years	Purebred
832	2013	P5521555	D13-1588	canine	ก๊อต	Male	Mixed	14	skin mass at left lateral trunk	Mast cell tumor grade 2	>8years	Mixed breed
833	2013	P5521555	D13-1589	canine	ก๊อต	Male	Mixed	14	Mass at tail	Perianal gland adenoma	>8years	Mixed breed
834	2014	P5731073	D14-604	canine	ฟี่	Male	Siberian Husky	5	Mass at neck area	Basal cell tumor	≤8years	Purebred
835	2014	P5410045	D14-372	canine	บราวนี่	Female	Pomeranian	3	Skin mass at abdomen	Inflamed lipoma	≤8years	Purebred
836	2014	P5731248	D14-625	canine	มิโคริ	Female	Mixed	10	mass at abdominal area	Osteosarcoma	>8years	Mixed breed
837	2014	P5731180	D14-595	canine	เป๋าตุง	Male	Shitzu		mass at right HL	Sabaceous epithelioma		Purebred
838	2014	P5729905	D14-219	canine	ทองเเท่ง	Male	GR	12	Testis	Seminoma	>8years	Purebred
839	2014	P5729515	57 B 014	canine	ช่วงช่วง		Mixed		Skin mass	Basosquamous epithelioma		Mixed breed
840	2014	P5625897	D14-201	canine	ฟูฟู	Male	Poodle	14	Skin mass at trunk	Sebaceous carcinoma	>8years	Purebred
841	2013	P5627604	56 B 2709	canine	มิกิ	Female	Shitzu	7	Skin mass	Fibrosarcoma	≤8years	Purebred
842	2014	P5730461	D14-404	canine	บันจี้	Male	Shitzu	7	Mass at perianal area	Perianal gland carcinoma	≤8years	Purebred
843	2014	P5305122	D14-253	canine	เบียร์	Female	Mixed	7	Mass at left upper eyelid	mast cell tumor	≤8years	Mixed breed
844	2014	P5729250	D14-060	canine	ซันโว	Male	Poodle	11	Testicular mass , Liver	Sertoli cell tumor, Seminoma	>8years	Purebred
845	2014	P5412636	D14-1898	canine	เชลซี	Male	Shitzu	8	nasal mass	TVT(Transmissible venereal tumor)	≤8years	Purebred
846	2014	P5409314	D14-293	canine	ขุนศึก	Male	Thai Ridgeback	6	Testis	Seminoma	≤8years	Purebred
847	2014	P5733444	D14-1875	canine	Diva	Female	Mixed	6	Skin mass at nose	Mast cell tumor grade 2	≤8years	Mixed breed
848	2014	P5735429	D14-1943	canine	เชลซี	Male	GR	5	Mass at maxilla	Amelanotic melanoma	≤8years	Purebred
849	2014	P5733025	D14-1878	canine	เสือ	Male	Mixed	12	Skin mass at shoulder	Hemangiosarcoma	>8years	Mixed breed
850	2014	P5733025	D14-1879	canine	เสือ	Male	Mixed	12	Skin mass at neck area	Nonepitheliotropic lymphoma	>8years	Mixed breed
851	2014	P5731914	D14-1854	canine	เซเว่น	Male	Shitzu	8	Skin mass and chin and mandibular lymph node	Squamous cell carcinoma, lymph node metastasis	≤8years	Purebred
852	2014	P5412344	D14-1853	canine	ดุ๊กดิ๊ก	Male	Poodle	10	Testicular mass	Benign complex prostate gland hyperplasia	>8years	Purebred
853	2014	P5412344	D14-1853	canine	ดุ๊กดิ๊ก	Male	Poodle	10	Perianal mass	Perianal gland carcinoma	>8years	Purebred
854	2014	P5734838	D14-1796	canine	ซูโม่	Female	Bull dog	4	Skin mass at axillary area, lymph node	mast cell tumor grade 3	≤8years	Purebred
855	2014	P5302155	D14-1364	canine	พลอย	Female	Shitzu	11	Mass at ear base	Sabaceous epithelioma	>8years	Purebred
856	2014	P5519855	D14-1754	canine	เเจ็ค	Male	Bangkaew	13	Mass at neck	Infiltrative lipoma	>8years	Purebred
857	2014	P5519855	D14-1754	canine	เเจ็ค	Male	Bangkaew	13	Perianal mass	Perianal gland adenoma	>8years	Purebred
858	2014	P5734885	D14-1803	canine	บุปผา	Female	Mixed	12	Skin mass at abdominal area	Mast cell tumor grade 2	>8years	Mixed breed
859	2014	P5734891	D14-1822	canine	Ginger	Female	LR		Mass at FL	Apocrine adenocarcinoma		Purebred
860	2014	P5623430	D14-1571	canine	ลูกโป่ง	Male	Mixed	7	nasal mass	Collagenous harmatoma with moderate subacute multifocal non-suppurative dermatitis	≤8years	Mixed breed
861	2014	P5733820	D14-1523	canine	ดีเซล	Male	GR	10	Mass at the shoulder and tail	Hemangiomas	>8years	Purebred
862	2014	P5733939	D14-1522	canine	Rookie	Female	Mixed	6	Mass at left elbow	Fibrosarcoma	≤8years	Mixed breed
863	2014	P5623267	D14-1163	canine	มะขาม	Female	Mixed	11	Skin mass beside the left eye	Melanoma	>8years	Mixed breed
864	2014	P5623267	D14-1163	canine	มะขาม	Female	Mixed	11	Mass at right FL	Mast cell tumor grade 2	>8years	Mixed breed
865	2014	P5734698	D14-1744	canine	ส้ม	Male	Mixed	10	Mass at neck , eye and nasal cavity	Mast cell tumor grade 2	>8years	Mixed breed
866	2014	P5729757	D14-1708	canine	ซาไก	Male	Mixed	9	Skin mass at right ear pinna	Undifferentiated carcinoma	>8years	Mixed breed
867	2014	P5724667	D14-1638	Feline	ไทเกอร์	Male	DSH	13	Mass at oral cavity	Fibromatous epulis	>8years	Mixed breed
868	2014	P5734235	D14-1620	canine	จิ๊กโก๋	Male	Miniature	16	Mass at gum	Fibrosarcoma	>8years	Purebred
869	2014	P5734355	D14-1705	canine	ปีใหม่	Male	GR	10	Mass at the right inguinal area	Squamous cell carcinoma	>8years	Purebred
870	2014	P5734355	D14-1706	canine	ปีใหม่	Male	GR	10	Lymph node	Squamous cell carcinoma metastasis	>8years	Purebred
871	2014	P5415005	D14-1680	canine	บูบู้	Male	Shitzu	6	Mass at the right eyelid	Basal cell tumor	≤8years	Purebred
872	2014	P5733675	D14-1637	canine	บัตเตอร์	Male	GR	12	Mass at the tarsal	Trichoblastoma	>8years	Purebred
873	2014	P5733289	D14-1361	canine	ก๋วยเตี๋ยว	Male	Mixed	6 mo	Mass at right phalange	Melanoma	≤8years	Mixed breed
874	2014	P5733149	D14-1286	canine	สตางค์	Female	Mixed	1	Skin mass at right HL	mast cell tumor grade 3	≤8years	Mixed breed
875	2014	P5411129	D14-1707	canine	โมเช่	Female	Mixed	13	Mass at right FL	Apocrine Cystadenoma	>8years	Mixed breed
876	2014	P5302155	D14-1520	canine	พลอย	Female	Shitzu	11	Mass at the ear pinna	Sabaceous epithelioma	>8years	Purebred
877	2014	P5733870	D14-1499	canine	โฟร์โมด	Male	Shitzu	12	Mass at perianal area	Perianal gland carcinoma	>8years	Purebred
878	2014	P5734107	D14-1590	canine	สามจุด	Male	Mixed	8	Mass at the prepuce	Squamous cell carcinoma	≤8years	Mixed breed
879	2014	P5733735	D14-1429	canine	หมีหุ้ย	Male	Mixed	3	Nasal mass	TVT(Transmissible venereal tumor)	≤8years	Mixed breed
880	2014	P5629013	D14-1335	canine	หมอก	Male	Mixed	6	Mass at the left phalange	Mast cell tumor grade 2	≤8years	Mixed breed
881	2014	P5629013	D14-1335	canine	หมอก	Male	Mixed	6	Mass at right HL	Lipoma	≤8years	Mixed breed
882	2014	P5733228	D14-1555	canine	Friday	Female	Mixed	10	Mass at gingiva	Osteosarcoma	>8years	Mixed breed
883	2014	P5733801	D14-1505	canine	ติ๊ก	Male	Mixed	12	Mass at perianal area	Perianal gland epithelioma	>8years	Mixed breed
884	2014	P5303210	D14-1403	canine	มิคมิว	Male	LR	4	Mass in abdominal cavity	Mesothelioma, tumor cell infiltration of fat tissue	≤8years	Purebred
885	2014	P5733534	D14-1404	canine	โตโต้	Male	French bulldog	9	Mass at the perianal area	Perianal gland carcinoma	>8years	Purebred
886	2014	P5733292	D14-1336	canine	เเตงโม	Female	Poodle	15	Mass at vagina	Fibroma	>8years	Purebred
887	2014	P5731641	D14-1377	canine	น้ำตาล	Female	Shitzu	10	Mass at the interdigital area of the left forelimb	Mast cell tumor grade 2	>8years	Purebred
888	2014	P5733228	D14-1333	canine	Friday	Female	Mixed	10	Mass at mandible	Chrodroma	>8years	Mixed breed
889	2014	P5733228	D14-1333	canine	Friday	Female	Mixed	10	Mass at gingiva	Osteosarcoma	>8years	Mixed breed
890	2014	P5733117	D14-1332	canine	ไจเเอ้นท์	Male	Mixed	7	Multiple mass at skin	mast cell tumor grade 3	≤8years	Mixed breed
891	2014	P5628562	D14-1308	canine	โกโก้	Male	Poodle	5	Testicular mass	Seminoma	≤8years	Purebred
892	2014	P5627006	D14-1191	canine	ไมโล	Female	Cocker	11	Mass	Hemangiopericytoma	>8years	Purebred
893	2014	P5625695	D14-1309	canine	จีจี้	Female	Mixed	11	Skin mass	Chondroblastic osteosarcoma	>8years	Mixed breed
894	2014	P5300549	D14-309	canine	เสือ	Male	Mixed	13	Testicular mass	Seminoma	>8years	Mixed breed
895	2013	P5628622	D13-1641	canine	โดนัท	Male	Dalmatian	10	Skin mass at scrotal sac	Hemangiosarcoma	>8years	Purebred
896	2014	P5729757	D14-1159	canine	ซาไก	Male	Mixed	9	Skin mass at ear pinna	Squamous cell carcinoma	>8years	Mixed breed
897	2014	P5733044	D14-1218	canine	จังกึม	Female	GR	8	Mass at the eyelid	Papillomatous and pseudocarcinomatous epithelial hyperplasia	≤8years	Purebred
898	2014	P5732591	D14-1073	canine	หม้อดิน	Male	Mixed	9	Skin mass at the thoracic area	Apocrine Cystadenoma	>8years	Mixed breed
899	2014	P5522515	D14-1018	canine	หมูปิ้ง	Female	Poodle	16	Mass at right upper lip	Amelanotic melanoma	>8years	Purebred
900	2014	P5732834	D14-1142	canine	ธงชัย	Male	Miniature	10	Oral mass	Melanoma	>8years	Purebred
901	2014	P5732513	D14-1040	canine	จัมโบ้	Male	GR	6	Mass at the sublumbar area	Undifferentiated carcinoma	≤8years	Purebred
902	2014	P5732962	D14-1247	canine	จัมโบ้	Male	GR	9	Splenomegaly	Hemangiosarcoma	>8years	Purebred
903	2014	P5520439	D14-1219	canine	น้ำพริกอ๋อง	Female	LR	11	Mass at right lower lip	Cutaneous histiocytoma	>8years	Purebred
904	2014	P5732928	D14-1158	canine	ดอลล่า	Male	Cocker	7	Mass at left 4th phalange	Cutaneous histiocytoma	≤8years	Purebred
905	2014	P5732418	D14-1019	canine	ชิกเก้น	Female	Mixed	4	Skin mass	Squamous cell carcinoma	≤8years	Mixed breed
906	2014	P5732057	D14-896	canine	เต้าฮวย	Female	Poodle	8	Mass in inguinal area	Myxosarcoma	≤8years	Purebred
907	2014	P5732032	D14-864	canine	มิลาน	Female	Poodle	12	Mass at oral cavity	Ameloblastoma	>8years	Purebred
908	2014	P5731149	D14-820	canine	มั่งมี	Male	Mixed	5	Mass at neck area	Lymphoma	≤8years	Mixed breed
909	2014	P5731885	D14-821	canine	เจนนี่	Female	Mixed	9	Mass at nipple	Acantholytic squamous cell carcinoma	>8years	Mixed breed
910	2014	P5628952	D14-962	canine	นำโชค	Male	Thai Ridgeback	5	Skin mass	Mast cell tumor grade 2	≤8years	Purebred
911	2014	P5732399	D14-997	canine	มินนี่	Female	Mixed	4 mo	Mass at the lip	Papilloma	≤8years	Mixed breed
912	2014	P5732309	D14-961	canine	ยู้ยี้	Male	Thai Ridgeback	10	Skin mass at abdominal area	Mast cell tumor grade 2	>8years	Purebred
913	2014	P5732412	D14-1077	Feline	พริตตี้	Female	DSH		Mass at the left eye	Squamous cell carcinoma		Mixed breed
914	2014	P5730141	D14-1107	canine	มดดำ	Female	Thai Ridgeback	10	Mass at mandible	Mast cell tumor grade 2	>8years	Purebred
915	2014	P5734355	D14-2166	canine	ปีใหม่	Male	GR	10	Mass at scrotal area	Squamous cell carcinoma	>8years	Purebred
916	2014	P5735207	D14-2067	canine	เเลค	Male	Poodle	10	Mass at the 2nd digit	Papilloma with pseudocarcinomatous epithelial hyperplasia	>8years	Purebred
917	2014	P5411562	D14-2038	canine	ถุงเงิน	Female	French bulldog	5	Lymph node	carcinoma metastasis	≤8years	Purebred
918	2014	P5411562	D14-2038	canine	ถุงเงิน	Female	French bulldog	5	Mass at vagina	Leiomyosarcoma	≤8years	Purebred
919	2014	P5735694	D14-2029	canine	ไปรมา	Female	Mixed	10	Mass at abdominal area	Xanthogranuloma	>8years	Mixed breed
920	2014	P5735697	D14-2028	canine	ลำไย	Female	Miniature	12	Mass at frontal area of head	Squamous cell carcinoma	>8years	Purebred
921	2014	P5735580	D14-1992	canine	โยโย่	Female	Poodle	10	Mass at vagina	Leiomyoma	>8years	Purebred
922	2014	P5626412	D14-2027	canine	มันนี่	Male	Mixed	9	Mass at the rostral part of mandible	Acanthomatous ameloblastoma (Acanthomatous epulis)	>8years	Mixed breed
923	2014	P5410012	D14-2098	canine	ซินดี้	Male	Mixed	18	Mass at the left HL (Mass)	Osteosarcoma (Osteoblastic cell type)	>8years	Mixed breed
924	2014	P5410012	D14-2098	canine	ซินดี้	Male	Mixed	18	Mass at the left HL (Bone)	Osteosarcoma	>8years	Mixed breed
925	2014	P5410012	D14-2098	canine	ซินดี้	Male	Mixed	18	Lymph node	Osteosarcoma metastasis	>8years	Mixed breed
926	2014	P5413014	D14-2068	canine	บุ้งกี้	Male	Poodle	10	Mass at the left ear pinna	Invert papilloma with severe chronic-active multifocal necrotic-suppurative dermatis	>8years	Purebred
927	2014	P5306261	D14-2066	canine	เเมงมัน	Male	Clumber spaniel	11	Skin mass	Sebaceous carcinoma	>8years	Purebred
928	2014	P5734833	D14-2039	canine	วันเพ็ญ	Female	Poodle	1	Skin mass	Complex (mixed) Apocrine adenocarcinoma	≤8years	Purebred
929	2014	P5735480	D14-1993	canine	เเตงโม	Male	Mixed	10	Subcutaneous mass	Lipoma	>8years	Mixed breed
930	2014	P5734383	D14-1991	canine	ปีโป้	Male	Chow Chow	5	Oral mass	Malignant melanoma	≤8years	Purebred
931	2014	P5730141	D14-2097	canine	มดดำ	Female	Mixed	10	Oral mass	Mast cell tumor grade 2	>8years	Mixed breed
932	2015	P5735429	D14-1943	canine	เซลซี	Male	GR	5	mass , bone	Amelanotic melanoma	≤8years	Purebred
933	2015	P5304847	D15-2880	canine	มิฟฟี่	Female	Poodle		Skin mass	Lipoma		Purebred
934	2015	P5734689	D15-2835	canine	จั๊กจั๊ก	Male	GR	7	Mass at the left HL and tip of prepuce	Cutaneous hemangiosarcoma	≤8years	Purebred
935	2015	P5844510	D15-2842	canine	ดอลล่า	Male	Mixed	11	Mass at neck and dorsal trunk	Sebaceous gland epithelioma	>8years	Mixed breed
936	2015	P5844662	D15-2826	canine	ศรีนวล	Female	Mixed	6	Mass at left flank	Fibrosarcoma	≤8years	Mixed breed
937	2015	P5837868	D15-0584	canine	ตาหวาน	Female	Mixed	11	Mass at lumbar area	Infiltrative lipoma with moderate degree of perivascular dermatitis	>8years	Mixed breed
938	2015	P5836625	D15-0140	canine	จูน	Female	Mixed	6	mass , bone	Osteosarcoma	≤8years	Mixed breed
939	2015	P5838304	58 B 56	canine	ถุงเท้า		Mixed		skin mass	Mast cell tumor, low grade		Mixed breed
940	2015	P5837824	D15-0428	canine	เปา	Male	Mixed	2	Mass at the eyelid	Mast cell tumor	≤8years	Mixed breed
941	2015	P5736229	D15-0315	canine	หมูกรอบ	Male	Pug	8	Oral mass	Ameloblastoma	≤8years	Purebred
942	2015	P5735539	D15-0167	canine	เจนนี่	Female	Mixed	10	Mass at right ear pinna	Squamous cell carcinoma	>8years	Mixed breed
943	2015	P5837118	D15-0230	Feline	จุ๋มจิ๋ม	Male	DSH	10	Mass at oronasal area	Squamous cell carcinoma	>8years	Mixed breed
944	2015	P5837639	D15-0371	canine	Millie	Female	Mixed	1	Skin mass	Sebaceous carcinoma	≤8years	Mixed breed
945	2015	P5736351	D15-0112	canine	มัฟฟิ้น	Female	GR	12	Mass at digit	Osteosarcoma	>8years	Purebred
946	2015	P5736456	D15-0057	canine	เขียว	Male	Mixed	8	Renal mass	Renal carcinoma	≤8years	Mixed breed
947	2015	P5836695	D12-0058	canine	มิ่งขวัญ	Male	Mixed	11	Mass beside penis	Perianal gland epithelioma	>8years	Mixed breed
948	2015	P5836869	D15-0132	canine	ไมโล	Male	Mixed	10	Mass at dorsal of trunk	Basal cell carcinoma	>8years	Mixed breed
949	2015	P5732098	D15-0009	canine	ยูโร	Male	Mixed	15	Mass at rostral mandible	Amelanotic melanoma	>8years	Mixed breed
950	2015	P5412806	D15-0092	canine	ลัคกี้	Female	Mixed	9	Mass at phalanges	Papilloma with sebaceous gland hyperplasia	>8years	Mixed breed
951	2014	P5735944	D14-2124	canine	ฟลุ๊ก	Male	Mixed	5	Skin mass	Sebaceous adenoma	≤8years	Mixed breed
952	2015	P5732877	D15-0811	canine	หมีพูล	Male	Mixed	7	Mass at right flank	Hemangioma was highly suspected	≤8years	Mixed breed
953	2015	P5839069	D15-0809	canine	เพชรจักร	Female	Puginese	13	Mass at upper lip	Melanoma	>8years	Purebred
954	2014	P5627392	D14-1778	canine	Chocco	Male	Miniature	9	Mass at perineal area	Perianal gland carcinoma	>8years	Purebred
955	2015	P5300838	D15-0207	canine	ทอง	Female	LR	13	Skin mass	Mass cell tumor grade 3	>8years	Purebred
956	2015	P5841372	D15-1815	canine	Hugo	Male	Mixed	10	Mass at lip and neck	Moderately differentiated squamous cells carcinoma	>8years	Mixed breed
957	2015	P5733963	D15-1930	canine	Ditto	Female	Miniature	13	Skin mass	Hemangiosarcoma	>8years	Purebred
958	2015	P5841054	D15-1906	canine	โดโด้	Male	Cocker	14	Mass at ear	Adenocarcinoma	>8years	Purebred
959	2015	P5412636	D15-1933	canine	เซลซี	Male	Shitzu	9	Nasal mass	Transmissible venereal tumor	>8years	Purebred
960	2015	P5841785	D15-1919	canine	โทน	Male	Mixed	5	Oral mass	Papilloma	≤8years	Mixed breed
961	2015	P5303916	D15-1900	canine	ข้าวปั้น	Male	Shitzu	6	Mass at hard palate	Fibroma	≤8years	Purebred
962	2015	P5841909	D15-1899	canine	ป๊อด	Male	Chihauhau	7	Lymphadenopathy	Lymphoma	≤8years	Purebred
963	2015	P5842195	D15-1927	canine	ตาล	Female	Mixed		Mass at conjunctiva	Basosquamous carcinoma		Mixed breed
964	2015	P5409303	D15-2782	canine	ตูลูสส์	Female	LR	5	Mass at left foot	Hemangiopericytoma was suspected	≤8years	Purebred
965	2015	P5844471	D15-2783	canine	โดนัด	Male	Mixed	10	Mass at left HL	Hemangioma was highly suspected	>8years	Mixed breed
966	2015	P5844517	D15-2827	canine	เด่น	Male	Mixed	2	Mass at mandible	Basal cell carcinoma(Infiltrative type)	≤8years	Mixed breed
967	2015	P5518217	D15-2828	canine	Happy	Male	Mixed	14	Mass at prepuce	Mast cell tumor grade 2	>8years	Mixed breed
968	2015	P5517947	58B 256	canine	มะขาม		Mixed		Skin mass	Trichoblastoma (Basal cell tumor)		Mixed breed
969	2015	P5840799	58 B 240	canine	เปี๊ยก		Mixed		Skin mass	Mast cell tumor		Mixed breed
970	2015	P5300241	D15-2538	canine	แต้ม	Female	Mixed	12	Mass at lower eyelid	Meibomian gland adenocarcinoma	>8years	Mixed breed
971	2015	P5843568	D15-2525	canine	ละมุด	Female	Mixed	6	Mass at left adrenal gland	Transitional cell carcinoma	≤8years	Mixed breed
972	2015	P5416057	D15-2507	canine	เมรุ	Male	LR	11	Gingival mass	Osteoma	>8years	Purebred
973	2015	P5843568	D15-2526	canine	ละมุด	Female	Mixed	6	Mass at spleen	Transitional cell carcinoma	≤8years	Mixed breed
974	2015	P5843568	D15-2524	canine	ละมุด	Female	Mixed	6	Mass at left kidney	Transitional cell carcinoma	≤8years	Mixed breed
975	2015	P5303916	D15-2573	canine	ข้าวปั้น	Male	Shitzu	6	Mass at nasal cavity	Malignant melanoma	≤8years	Purebred
976	2015	P5303916	58B 226	canine	ข้าวปั้น		Mixed		Nasal mass	Malignant peripheral nerve sheath tumor		Mixed breed
977	2015	P5844010	D15-2591	canine	เปา	Male	GR	6	Mass at skin	Cutaneous hemangioma	≤8years	Purebred
978	2015	P5414692	D15-2142	canine	น้ำพริกอ่อง	Female	LR	10	Mass at eyelid	Meibomian gland carcinoma	>8years	Purebred
979	2015	P5300620	D15-2400	canine	เเตงกวา		Poodle	9	Mass at skin	Sebaceous gland adenocarcinoma	>8years	Purebred
980	2015	P5841884	D15-2289	canine	ดิก		Mixed	15	Oral mass	Fibrosarcoma	>8years	Mixed breed
981	2015	P5843442	58 B 199	canine	กีวี		Mixed		Testicular tumor	Seminoma		Mixed breed
982	2015	P5842776	D15-2339	canine	หมี		Mixed	5	Frontal sinas mass	Squamous cell carcinoma	≤8years	Mixed breed
983	2015	P5841884	D15-1865	canine	ดิก		Mixed	15	Oral mass	Malignant melanoma	>8years	Mixed breed
984	2015	P5839965	D15-1127	canine	นำโชค	Male	Domestic	2	Mass at lip	Transmissible venereal tumor	≤8years	Purebred
985	2015	P5843171	D15-2297	canine	นิล	Male	Rott weiler	5	​Mass at tongue	Lingual hemangioma	≤8years	Purebred
986	2015	P5836899	58 B 192	canine	อะตอม		Mixed		Nasal mass	Extragenital Canine Transimssible Venereal Tumor		Mixed breed
987	2015	P5841287	D15-1593	canine	โบว์นัด	Female	GR	8	Mass at hip and anus	Fibrosarcoma	≤8years	Purebred
988	2015		D15-1072	canine	Zorro	Male	Mixed	11	Mass at gum	Squamous cell carcinoma with pseudocarcinomatous epithelial hyperplasia	>8years	Mixed breed
989	2015	P5839940	D15-1084	canine	Mocca		Poodle	11	Abdominal mass	Complex adenoma	>8years	Purebred
990	2015	P5837606	D15-0343	canine	ไปไป๋	Female	Sharpei	7	Mass at left elbow	Mast cell tumor grade 2	≤8years	Purebred
991	2015	P5837041	D15-0387	canine	โมเนะ	Male	Poodle	8	Mass at cervical area	Mast cell tumor grade 2	≤8years	Purebred
992	2015	P5838304	D15-0572	canine	ถุงเท้า	Male	Pit Bull	7	Skin mass	Mast cell tumo grade 1	≤8years	Purebred
993	2015	P5306086	D15-0538	canine	ไทเกอร์	Male	Mixed	16	Mass at scrotal sac	Mast cell tumor grade 2	>8years	Mixed breed
994	2015	P5306086	D15-0537	canine	ไทเกอร์	Male	Mixed	16	Mass at cheak	Leiomyosarcoma	>8years	Mixed breed
995	2015	P5836637	D15-0020	canine	สเปน	Female	Beagle	6 mon	Mass at facial	Basal cell tumor (Trichoblastoma)	≤8years	Purebred
996	2015	P5837297	D15-0494	canine	คู่ขา	Female	Poodle	10	Oral mass	Squamous cell carcinoma	>8years	Purebred
997	2015	P5414451	58 B 156	Canine	เบนเซนจิ		Mixed		Nasal mass	Malignant melanoma		Mixed breed
998	2015	P5409445	D15-1590	canine	นับทอง	Female	Poodle		Mass	Lipoma was highly suspected		Purebred
999	2015	P5627365	D15-1808	canine	เต้าเจี้ยว	Female	Bangkaew	11	Mass at hind limb	Mast cell tumor grade 2	>8years	Purebred
1000	2015	P5840903	D15-1521	canine	Luck	Female	Pug	8	Mass at right lower lip	Melanoma	≤8years	Purebred
1001	2015	P5837515	D15-1742	Feline	ทอง	Male	DSH	5	Nasal mass	Melanoma (ballooning type) with osteoblastic dysplasia	≤8years	Mixed breed
1002	2015	P5837515	D15-1742	Feline	ทอง	Male	DSH	5	Nasal mass	Adenoma	≤8years	Mixed breed
1003	2015	P5840664	D15-1314	canine	โมโม่	Male	Pekingese	9	Mass at dorsal of trunk	Melanoma	>8years	Purebred
1004	2015	P5840763	D15-1367	canine	สไปร์	Female	Beagle	3 mon	Mass at hard palate	Papilloma	≤8years	Purebred
1005	2015	P5841647	D15-1758	canine	ไมเคิล	Male	Mixed	3	Mass at left thorax	Lipoma	≤8years	Mixed breed
1006	2015	P5841850	D15-1760	Feline	กาละเเมร์	Male	DSH	3	Nasal mass	Squamous cell carcinoma was highly suspected	≤8years	Mixed breed
1007	2015	P5414951	D15-1608	canine	บาเซนจิ	Female	Mixed	4	Mass at the right nasal	Melanoma	≤8years	Mixed breed
1008	2015	P5840846	D15-1592	canine	มาร์ค	Male	GR	5	Mass at right mandible	Fibrosarcoma	≤8years	Purebred
1009	2015	P5837469	D15-1864	canine	โดดเดี่ยว	Female	Mixed	8	Mass	Hemangiopericytoma	≤8years	Mixed breed
1010	2015	P5841150	D15-1809	canine	แบ่งบุญ	Male	Mixed	9	Lymph node	Lymphoma	>8years	Mixed breed
1011	2015	P5838765	D15-1481	canine	ชะม้อ	Female	Mixed	10	mass, lymph node	Mast cell tumor grade 2 with lymph node metastasis	>8years	Mixed breed
1012	2015	P5839325	D15-1433	canine	บูบู้	Male	Mixed	10	Mass at right mandible	Osteosarcoma	>8years	Mixed breed
1013	2015	P5408834	D15-0910	canine	ปุ้มปุ้ย		Mixed	14	Mass at right HL	Mast cell tumor grade 2	>8years	Mixed breed
1014	2015	P5839614	D15-1003	canine	โต๊ะโม๊ะ	Male	Mixed	10	Mass at perineal area	Basal cell carcinoma	>8years	Mixed breed
1015	2015	P5636977	D15-0879	canine	คาริเบอร์	Male	Mixed	3	Skin mass	Squamous cell carcinoma	≤8years	Mixed breed
1016	2015	P5840746	D15-1402	canine	หมอก	Male	GR	11	Mass ar femur	Chondrosarcoma	>8years	Purebred
1017	2015	P5840746	D15-1402	canine	หมอก	Male	GR	11	Mass at scrotal sac	Squamous cell carcinoma with infundibular cyst	>8years	Purebred
1018	2015	P5840480	D15-1445	canine	ฟร้อน	Female	Cocker		Lymph node	Carcinoma metastasis		Purebred
1019	2015	P5732673	D15-1447	Hamster	โรตี	Male	Giant	2	Mass at right ear pinna	Basal cell tumor	≤8years	Purebred
1020	2015	P5300807	D15-1395	canine	อุ่นใจ	Male	Mixed	7	Mass at trunk	Lipoma	≤8years	Mixed breed
1021	2015	P5300807	D15-1395	canine	อุ่นใจ	Male	Mixed	7	Mass at digit	hemartoma	≤8years	Mixed breed
1022	2015	P5626904	D15-1126	canine	อาร์เทอร์	Male	Cocker	12	Mass at skin	Hemangiosarcoma	>8years	Purebred
1023	2015	P5838879	D15-1174	canine	ทองหยอด	Female	Poodle	17	Oral mass	Melanoma	>8years	Purebred
1024	2015	P5836869	D15-0814	canine	ไมโล	Male	Mixed	10	Mass at neck and shoulder	Basal cell carcinoma	>8years	Mixed breed
1025	2015	P5839010	D15-0909	canine	โอเลี้ยง	Female	Mixed	10	Mass at cervical area	Melanoma	>8years	Mixed breed
1026	2015	P5839739	D15-1021	canine	ทองคำ	Male	Mixed	9	Mass at perineal area	Osteosarcoma (Giant cell type)	>8years	Mixed breed
1027	2015	P5626149	D15-1209	canine	ไจ๋ไจ๋	Male	Poodle	8	Mass at the the tail	Perianal gland carcinoma	≤8years	Purebred
1028	2015	P5840622	D15-1329	canine	ดูดู้	Male	GR	6	Mass at the right forelimb	Osteosarcoma	≤8years	Purebred
1029	2015	P5409221	D15-1393	canine	บูบู้	Female	Mixed	10	Mass at righr lower lip	Mast cell tumor grade 2	>8years	Mixed breed
1030	2015	P5839313	D15-964	canine	Happy	Male	Mixed	9	Bone	Osteosarcoma(Fibroblastic) was highly suspected	>8years	Mixed breed
1031	2015	P5838388	D15-658	canine	แบมบู	Female	Miniature	13	Mass at the trunk	Mast cell tumor grade 2	>8years	Purebred
1032	2015	P5838601	D15-761	Feline	ปุ๊กกี้	Female	DSH	9		Solid-cystic apocrine edenoma	>8years	Mixed breed
1033	2015	P5839069	D15-1431	canine	เพชรจักร	Female	Pekingese	13	Mass at the nose	Transitional cell carcinoma	>8years	Purebred
1034	2015	P5837301	D15-0944	canine	บุญเติม	Male	Mixed	7	Mass in the left nasal cavity	Transmissible venereal tumor	≤8years	Mixed breed
1035	2015		D15-0972	canine	รักจัง	Female	Mixed	8	Mass at the right conjunctiva	Malanoma	≤8years	Mixed breed
1036	2015	P5305583	D15-0969	canine	ดุ๊ก	Male	Shitzu	7	Mass at the left upper eyelid	Meibomian gland epithelioma	≤8years	Purebred
1037	2015	P5733410	D15-0479	canine	ลูกหว้า	Female	Mixed	12	Mass at the eye and eyelid	Mast cell tumor grade 3	>8years	Mixed breed
1038	2015	P5408859	D15-0435	canine	คอนโด		Shitzu		Conjunctiva mass	Acantholytic squamous cell carcinoma		Purebred
1039	2015	P5412362	D15-0284	canine	มีมี่	Male	Shitzu	10	Right testicular	Sertoli cell tumor	>8years	Purebred
1040	2015	P5837354	D15-0266	canine	หลง	Male	Poodle	15	Mass at nose	Mast cell tumor grade 3	>8years	Purebred
1041	2015	P5519598	D15-0131	canine	จูโน่	Male	Bulldog	6	Mass at right FL	Mast cell tumor grade 2	≤8years	Purebred
1042	2015	P5836822	D15-0116	canine	เทเลอร์	Male	Pit Bull	8	Mass at scrotal sac	Mast cell tumor grade 2	≤8years	Purebred
1043	2014	P5735534	D14-1986	canine	ซูซ่า	Male	Shitzu	10	Left cormeal mass	Squamous cell carcinoma	>8years	Purebred
1044	2014	P5303623	D14-1874	canine	เงินทอง	Female	Bangkaew	13	Mass ar the stomach and liver	Gastric tubular adenocacinoma, liver metastasis	>8years	Purebred
1045	2014	P5734622	D14-1724	canine	Prize	Female	Mixed	1	Mass at ventral trunk	Cutaneous histiocytoma	≤8years	Mixed breed
1046	2015	P5302155	D15-2825	canine	พลอย	Female	Shitzu	12	Mass at the right side of tarsal area	Sebaceous gland epithelioma	>8years	Purebred
1047	2015	P5844272	D15-2681	canine	ถุงเงิน	Female	Pug	8	Vaginal mass	Leiomyoma	≤8years	Purebred
1048	2015	P5300641	D15-2806	canine	Modi	Male	Mixed	5	Skin mass at the thoracic and abdominal area	Lipoma	≤8years	Mixed breed
1049	2015	P5521830	D15-2300	canine	ข้าวหอม	Female	Shitzu	10	Mass in neck area, lateral of the body	Lipoma with cysts	>8years	Purebred
1050	2015	P5842115	D15-1934	canine	โมจิ	Female	German shepherd	4mon	Mass at the skull	Fibrosarcoma	≤8years	Purebred
1051	2015	P5628458	D15-1432	canine	ถุงเงิน	Female	Mixed	8	Intestinal mass	Fibrosarcoma	≤8years	Mixed breed
1052	2015	P5843228	58B210	canine	ใหม่		Mixed		Vaginal mass	Leiomyosarcoma		Mixed breed
1053	2015	P5842984	D15-2233	canine	ปั๊ป	Female	Poodle	8	Mass at ventral abdomen	Fibrosarcoma	≤8years	Purebred
1054	2015	P5840799	D15-1394	canine	เปี๊ยก	Male	Beagle	5	Skin mass at the right digit	Mast cell tumor grade 2	≤8years	Purebred
1055	2015	P5300669	D15-1254	canine	Bento	Male	Mixed	10	Mass at right HL	Mast cell tumor grade 2	>8years	Mixed breed
1056	2015	P5840333	D15-1195	canine	มะขาม	Female	Poodle	9	Skin mass at right HL	Mast cell tumor grade 3	>8years	Purebred
1057	2015	P5837022	D15-0179	canine	มีทรัพทย์	Female	Siberian Husky	10	Vaginal mass	Fibroma (Durum)	>8years	Purebred
1058	2015	P5626429	D15-1806	canine	Pike	Male	GR	9	Mass	Transmissible venereal tumor	>8years	Purebred
1059	2015	P5838513	D15-0690	canine	บุญมี	Female	Mixed	7	Liver	Hepatocellular carcinoma, diffuse vacuolar hepatocytes degeneration	≤8years	Mixed breed
1060	2015	P5839588	D15-0965	canine	เหมย	Female	Mixed	11	Mass at urinary bladder	Fibroma	>8years	Mixed breed
1061	2015	P5841170	D15-1607	canine	ต้า	Male	Miniature	8	Mass at perineal area	Perianal gland carcinoma	≤8years	Purebred
1062	2015	P5837479	D15-1526	Hedgehog	ชิชา			5	Subcutaneous mass	Anaplastic sarcoma	≤8years	Mixed breed
1063	2015	P5840456	D15-1255	canine	ลูกหมี	Female	Mixed	9	Skin mass	Lipoma	>8years	Mixed breed
1064	2015	P5839285	D15-0853	canine	บู้บี้	Female	Mixed	15	Mass at left pad	Plasma cell tumor	>8years	Mixed breed
1065	2015	P5627365	D15-0743	canine	เต้าเจี้ยว	Female	Bangkaew	11	Skin mass at inguinal area	Mast cell tumor grade 2	>8years	Purebred
1066	2015	P5838981	D15-0762	canine	น้ำหวาน	Female	LR	5	Mass at tail	Fibrosarcoma	≤8years	Purebred
1067	2015	P5838338	D15-0607	canine	เก๋า	Male	Mixed	7	Mass at dorsal of trunk	Osteoma cutis with squamous cell carcinoma	≤8years	Mixed breed
1068	2015	P5521128	D15-0401	canine	ปีเตอร์	Male	Doberman	9	Mass at thoracic area	Squamous cell carcinoma	>8years	Purebred
1069	2015	P5837325	D15-0344	canine	โอเว่น	Male	GR	5	Mass at perineal area	Perianal gland epithelioma	≤8years	Purebred
1070	2015	P5837068	D15-0296	canine	เเบล็ค	Female	Mixed	9	Skin mass at perineal area	Fibrosarcoma	>8years	Mixed breed
1071	2015	P5837035	D15-0240	Feline	ข้าวสวย	Male	DSH	5months	Mass at right trunk	Adenocarcinoma	≤8years	Mixed breed
1072	2015	P5840662	58 B 214	canine	เบบี้	Female	Miniature	11	Urinary bladder mass	Transitional cell carcinoma		Purebred
1073	2015	P5410202	D15-1759	canine	สวาท	Male	Thai Ridgeback	5	Skin mass at back	Mast cell tumor with fibrinous dysplasia	≤8years	Purebred
1074	2015	P5840662	D15-1358	canine	เบบี้	Female	Miniature	11	Urinary bladder mass	Transitional cell carcinoma (Papillary and infiltrating transitional cell carcinoma)	>8years	Purebred
1075	2015	P5837355	D15-0836	canine	แป้ง	Female	Mixed	14	Mass at lower eyelid	Meibomian gland carcinoma	>8years	Mixed breed
1076	2015	P5520789	D15-0236	canine	ดอลล่า	Female	Cocker	9	Mass at the perianal area	Basal cell carcinoma	>8years	Purebred
1077	2015	P5303313	D15-0962	canine	ไซโก้	Female	Golden Retriecer	12	Mass at axillary area	Mast cell tumor grade 2	>8years	Purebred
1078	2015	P5839552	D15-0945	canine	เเฟนต้า	Male	Mixed	9	Mass at right testis	Seminoma	>8years	Mixed breed
1079	2015	P5839552	D15-0945	canine	เเฟนต้า	Male	Mixed	9	Mass at abdomen	Seminoma	>8years	Mixed breed
1080	2015	P5839406	D15-0966	canine	ขาว	Male	Mixed	10	Skin mass	Mast cell tumor grade 3	>8years	Mixed breed
1081	2015	P5305403	D15-0019	canine	Max	Male	Mixed	9	Mass at soft palate	Malignant schwannoma	>8years	Mixed breed
1082	2015	P5838110	D15-0517	canine	ขาว	Female	Bangkaew	10	Mass at lower eyelid	Transmissible venereal tumor	>8years	Purebred
1083	2015	P5414399	D15-0189	canine	ชูชิ	Male	Shitzu	14	Perianal mass	Perianal gland carcinoma	>8years	Purebred
1084	2015	P5839252	D15-0852	canine	ฮันนี่	Female	Mixed		Mass at left ear	Melanocytoma		Mixed breed
1085	2015	P5415798	D15-2781	canine	โยกี้	Male	Pomeranian	11	Skin mass	Fibrosarcoma was suspected	>8years	Purebred
1086	2015	P5842869	D15-2799	canine	น้ำตาล	Female	Cocker	13	Vaginal mass	Leiomyoma	>8years	Purebred
1087	2015	P5843518	D15-2597	canine	โฟโมสต์	Female	Pomeranian	14	Urinary bladder mass	Transitional cell carcinoma (Papillary and infiltrating type)	>8years	Purebred
1088	2015	P5841231	D15-1553	canine	บุ้งกี้	Female	Mixed	16	Mass at lip	Basal cell carcinoma	>8years	Mixed breed
1089	2015	P5841231	D15-1553	canine	บุ้งกี้	Female	Mixed	16	Mass at eyelid	Melanoma	>8years	Mixed breed
1090	2015	P5414384	D15-1684	canine	จูลี	Female	Cocker	9	Mass at conjunctiva	Squamous cell carcinoma	>8years	Purebred
1091	2015	P5841589	D15-1683	canine	จีจี้	Male	Shitzu	9	Mass at the perianal area	Hepatoid gland epithelioma	>8years	Purebred
1092	2015	P5841093	D15-1497	canine	ขาว	Male	Mixed	7	Mass at ventral trunk	Fibrosarcoma	≤8years	Mixed breed
1093	2015	P5305057	D15-1428	Feline	นำโชค	Male	DSH	6	Mass at nasal cavity	Transitional cell carcinoma	≤8years	Mixed breed
1094	2015	P5839091	D15-1102	canine	ลักกี้	Male	Mixed	7	Mass at back	Basal cell carcinoma	≤8years	Mixed breed
1095	2015		D15-1156	canine	ตุ๊กติ๊ก	Female	Shitzu		Liver	Cholangiocarcinoma, diffuse hepatocytes degeneration and necrosis		Purebred
1096	2015	P5841869	D15-1772	canine	Doey	Male	Beagle	7	Skin mass	Lipoma	≤8years	Purebred
1097	2015	P56233267	D15-1781	canine	มะขาม	Female	Mixed	13	Mass at digit and lymph node	Histiocytoma with metastasis	>8years	Mixed breed
1098	2015	P5841808	D15-1744	canine	บุญมี	Female	Mixed	3	Mass at trunk	Liposarcoma (Low grade malignancy)	≤8years	Mixed breed
1099	2015	P5841692	D15-1714	canine	หน่า	Female	Mixed	5	Mass in the abdomen	Thecoma	≤8years	Mixed breed
1100	2015	P5839864	D15-1589	canine	แอนดี้	Male	Siberian Husky	10	Mass at right testis	Seminoma	>8years	Purebred
1101	2015	P5841314	D15-1595	canine	มูมู่	Male	Shitzu	15	​Mass at inguinal area	Seminoma	>8years	Purebred
1102	2015	P5843584	D15-2483	canine	Spot	Female	Siberian Husky	13	Mass at mandible	Malignant melanoma	>8years	Purebred
1103	2015	P5736548	D15-2368	canine	เเว่น	Male	Mixed	14	Mass at perineal area	Anal sac adenocarcinoma	>8years	Mixed breed
1104	2015	P5843204	58 B 182	canine	โชค		Mixed		Skin mass	Mass cell tumor high grade		Mixed breed
1105	2015	P5732427	D15-2185	canine	แป้ง	Female	GR	7	Skin mass	Cutaneous hemangiosarcoma	≤8years	Purebred
1106	2015	P5842868	D15-2216	canine	พุดดิ้ง	Female	Shitzu	10	Skin mass	Sebaceous gland adenoma	>8years	Purebred
1107	2015	P5415490	D15-1898	canine	Poppy	Female	Pug	3	Skin mass	Trichoepithelioma	≤8years	Purebred
1108	2015	P5301936	D15-1066	canine	ป้าง	Male	Mixed	7	Mass at right thoracic	Lipoma	≤8years	Mixed breed
1109	2015	P5818818	D15-0738	canine	คูก้า	Male	Mixed	14	Mass at right upper lip	Fibrosarcoma	>8years	Mixed breed
1110	2015	P5837792	D15-0426	canine	ตัวเล็ก	Female	Mixed	6	Mass at skin	Peripheral nerve sheath tumor(Schwannoma)	≤8years	Mixed breed
1111	2014	P5623277	D14-1378	canine	เฉาก๊วย	Male	Mixed	6	Skin mass	Infiltrative lipoma	≤8years	Mixed breed
1112	2014	P5732874	D14-1260	canine	เต้าหู้	Male	Cocker	7	Mass at oral cavity	Fibrosarcoma	≤8years	Purebred
1113	2014	P5732886	D14-1162	canine	เเบล็คกี้	Male	Mixed	10	Mass at the left HL	Osteosarcoma( Osteoblastic type)	>8years	Mixed breed
1114	2015	P5730007	D15-0606	canine	แม็กกี้	Female	Collie	2	Mass at neck	Basal cell tumor	≤8years	Purebred
1115	2015	P5838037	d15-0478	canine	บราวนี่	Female	LR	11	Mass at vagina	Fibroma (Durum)	>8years	Purebred
1116	2015	P5837594	D15-0388	canine	เเซนวิส	Male	Miniature	11	Skin mass	Sebaceous epithelioma	>8years	Purebred
1117	2015	P5836762	D15-0297	canine	ลูกหมี	Male	Mixed	10	Mass at left axillary area	Adenocarcinoma	>8years	Mixed breed
1118	2015	P5841551	D15-1712	canine	กระติ๊บ	Male	Shitzu	4	Mass in dorsal trunk	Lipoma with chronic inflammation	≤8years	Purebred
1119	2015	P5840863	D15-1743	canine	ซิ่น	Female	Mixed	10	Mass at urethra	Fibroma	>8years	Mixed breed
1120	2015	P5840110	D15-1125	canine	ดอลล่า	Male	Pomeranian	10	Mass at mandible	Fibromatous epulis	>8years	Purebred
1121	2015	P5840123	D15-1124	canine	ก๋วยเจ๋ง	Male	GR	14	Oral mass	Melanoma	>8years	Purebred
1122	2015	P5839343	D15-1005	canine	บัวลอย	Female	Pit Bull	4	Bone	Osteosarcoma	≤8years	Purebred
1123	2015	P5838879	D15-0876	canine	ทองหยอด	Female	Mixed	17	Mass at gum	Melanoma	>8years	Mixed breed
1124	2015	P5839360	D15-0877	canine	ลักกี้		Mixed	14	Mass at perineal area	Perianal gland carcinoma	>8years	Mixed breed
1125	2015	P5837239	D15-878	canine	หมั่นโถว	Female	Mixed	8	Mass at right FL	Acantholytic squamous cell carcinoma	≤8years	Mixed breed
1126	2015	P5837352	D15-970	canine	วีวี่	Female	Pomeranian	14	Mass at vagina	Fibtoma (Durum)	>8years	Purebred
1127	2015	P5844664	D15-2836	canine	มอมเเมม		Mixed		Mass at perineal area	Hepatoid gland carcinoma		Mixed breed
1128	2015	P5733963	D15-2834	canine	Ditto	Female	Mixed	13	Mass at the left forelimb	Sebaceous gland adenoma	>8years	Mixed breed
1129	2015	P5843113	D15-2288	canine	เฉาก๊วย	Female	Mixed	6	Mass at urinary bladder	Transitional cell carcinoma	≤8years	Mixed breed
1130	2015	P5519954	D15-2186	canine	Branson	Male	Dogue de Bordeaux	4	Skin mass	Apocrine gland adenocarcinoma(Complex)	≤8years	Purebred
1131	2015	P5842150	D15-1905	canine	อ้วน	Male	Mixed	15	Skin mass	Fibrosarcoma	>8years	Mixed breed
1132	2015	P5842169	D15-1904	canine	เเซลลี่	Female	LR	8	Mass at ear	Trichoepithelioma	≤8years	Purebred
1133	2015	P5842169	D15-1904	canine	เเซลลี่	Female	LR	8	Mass at vagina	Fibroma	≤8years	Purebred
1134	2015	P5301232	D15-0603	canine	ขวัญ	Female	Thai Ridgeback	11	Mass at right eyelid	Melanoma	>8years	Purebred
1135	2014	P5735890	D14-2172	Feline	ตาลอ่อน	Female	DSH	3	Mass at head	Anaplastic histiocytic sarcoma	≤8years	Mixed breed
1136	2014	P5736242	D14-2215	Feline	น้ำตาล	Female	DSH	5	Mass at oral cavity	Squamous cell carcinoma	≤8years	Mixed breed
1137	2015	P5416057	D15-0018	canine	เมรุ	Male	LR	10	Skin mass at facial area	Squamous cell carcinoma with sebaceous epithelioma	>8years	Purebred
1138	2015	P5735890	D14-2172	Feline	ตาลอ่อน	Female	DSH	3	Mass at median canthus of eye	Squamous cell carcinoma	≤8years	Mixed breed
1139	2015	P5838232	D15-0725	canine	โดโด้	Male	GR	8	Urinary bladder mass	Squamous cell carcinoma	≤8years	Purebred
1140	2015	P5838658	D15-0808	canine	มอมเเมม	Male	Shitzu	7	Mass at cervical area	Osteosarcoma (Giant cell type)	≤8years	Purebred
1141	2015	P5623207	D15-0849	canine	อุ่นเรือน	Female	Mixed	12	Mass at left flank	Apocrine adenocarcinoma	>8years	Mixed breed
1142	2015	P5839266	D15-0851	canine	ข้าวเหนียว	Male	Miniature	10	Mass at neck	Trichoblastoma (Basal cell tumor)	>8years	Purebred
1143	2015	P5838799	D15-0730	canine	อ้วน	Male	Mixed	10	Mass at upper lip	Amelanotic melanoma	>8years	Mixed breed
1144	2015	P5626904	D15-0718	canine	อาเทอร์	Male	Cocker	12	Mass at caudal abdomen	Hemangiosarcoma was highly suspected	>8years	Purebred
1145	2015	P5520733	D15-1043	canine	ไมโล	Male	LR	6	Testicular tumor	Sertoli cell tumor, seminoma	≤8years	Purebred
1146	2015	P5839854	D15-1042	canine	บาร์ซู	Female	English cocker	20	Mass at dorsal of trunk	Squamous cell carcinoma	>8years	Purebred
1147	2015	P5836671	D15-2598	canine	ติงลี่	Male	Mixed	9	Mass at urinary bladder	Leiomyoma	>8years	Mixed breed
1148	2015	P5842011	58 B 197	canine	Google		Mixed		Skin mass	Lymphoma, high grade		Mixed breed
1149	2015	P5518711	D15-2269	canine	อะตอม	Female	GR	12	left hip mass	Infundibular cyst with lipoma	>8years	Purebred
1150	2015	P5518711	D15-2269	canine	อะตอม	Female	GR	12	Left side of the body	Lipoma	>8years	Purebred
1151	2015	P5842553	D15-2069	canine	ซันวา	Male	Pit Bull	8	Mass	Mast cell tumor grade 2	≤8years	Purebred
1152	2015	P5842228	D15-1998	canine	ลุกดิ๊ก	Male	Mixed	14	Mass at oral cavity	Fibrosarcoma	>8years	Mixed breed
1153	2015	P5840964	D15-1518	canine	ส้ม	Female	Mixed	9	Skin mass	Melanoma	>8years	Mixed breed
1154	2015	P5733434	58 B 205	canine	โตโด้	Male	French Bulldog	10	Skin mass	Mast cell tumor, low grade		Purebred
1155	2015	P5519028	D15-2439	Feline	ไข่เจียว	Male	Persian	3	Mass at left corneal sequestrum	Feline primary ocular sarcoma (Post-traumatic sarcoma)	≤8years	Purebred
1156	2015	P5733434	D15-2438	canine	โตโต้	Male	French Bulldog	10	Skin mass	Mast cell tumor grade 2	>8years	Purebred
1157	2015	P5842238	D15-2016	canine	เซน่า	Female	Pit Bull	3	Skin mass	Lipoma	≤8years	Purebred
1158	2015	P5307768	D15-1870	canine	ลูกเดือย	Female	Mixed	11	Skin mass	Sebaceous epithelioma	>8years	Mixed breed
1159	2015	P5519115	D15-1619	canine	ยุกยิก	Female	Mixed	5	Mass	Mast cell tumo grade 1	≤8years	Mixed breed
1160	2015	P5300753	D15-1345	canine	เมล่อน	Male	GR	12	Mass at right eyelid	Meibomian gland epithelioma	>8years	Purebred
1161	2015	P5839087	D15-1006	canine	ดี๊	Female	Mixed	8	Skin mass	Lipoma	≤8years	Mixed breed
1162	2015	P5839902	D15-1067	canine	จัมโบ้	Male	Cocker	12	Mass at left abdominal area	Trichoblastoma (Basal cell tumor)	>8years	Purebred
1163	2015	P5842261	D15-2017	Sugar glider	ช้อปเปอร์	Male	Sugar glider	8 months	Oral mass	Melanoma(Spindle type) / Fibrosarcoma	≤8years	Purebred
1164	2016	P5732781	D16-2171	canine	Tao		Mixed		Mass at left lower eyelid	Squamous cell carcinoma		Mixed breed
1165	2016	P5414692	D16-2005	canine	น้ำพริกอ่อง	Female	LR	11	Mass at right lower mouth	Cutaneous histiocytoma	>8years	Purebred
1166	2016	P5950089	D16-2006	canine	ตัวเล็ก	Female	Shitzu	10	Mass at right corneal	Squamous cell carcinoma	>8years	Purebred
1167	2016	P5414692	D16-2003	canine	น้ำพริกอ่อง	Female	LR	11	Mass at left upper eyelid	Meibomian gland carcinoma	>8years	Purebred
1168	2016	P5736237	59 B 121	canine	ดีดี้	Male	Shitzu	6	Corneal mass	Squamous cell carcinoma, well differentiated type		Purebred
1169	2016	P5736237	D16-1404	canine	ดีดี้	Male	Shitzu	6	Corneal mass	Squamous cell carcinoma	≤8years	Purebred
1170	2016	P5948877	59 B 117	canine	Tao		Mixed		Eyelid mass	Squamous cell carcinoma, well differentiated type		Mixed breed
1171	2016	P5947377	D16-0840	canine	ขนมปัง	Female	Pomeranian	13	Mass at left lower eyelid	Squmous cell carcinoma was highly suspected	>8years	Purebred
1172	2016	P5730202	D16-2686	canine	มุม	Male	Mixed	10	Mass at right FL	Malignant melanoma	>8years	Mixed breed
1173	2016	P5950111	D16-1941	canine	น้ำปลา	Male	Poodle	11	Mass at left FL	Cutaneous plasma cell tumor	>8years	Purebred
1174	2016	P5947620	D16-0889	canine	กระปุก	Female	German Sheperd	6	Mass at the lower lip	Canine cutaneous histiocytoma was highly suspected	≤8years	Purebred
1175	2016	P5307920	D16-1726	canine	กังฟู	Female	Mixed	10	Mass at the left hind limb(footpad area)	Lipoma	>8years	Mixed breed
1176	2016	P5951258	D16-2379	canine	มารวย	Male	Mixed	11	Mass at the right lower lip	Malignant melanoma	>8years	Mixed breed
1177	2016	P5952418	D16-2785	canine	จิ้มลิ้ม	Female	Shitzu	10	Mass at vulva	Fibroma	>8years	Purebred
1178	2016	P5951312	D16-2381	canine	ลาเต้	Male	Mixed	5	Mass at right FL	Trichoblastoma ( spindle cell type)	≤8years	Mixed breed
1179	2016	P5951115	D16-2321	canine	เเบงค์	Male	Mixed	13	Mass at sublingual area	Oral malignant melanoma	>8years	Mixed breed
1180	2016	P5951115	D16-2323	canine	เเบงค์	Male	Mixed	13	Mass from skin	Hemangioma	>8years	Mixed breed
1181	2016	P5951115	D16-2322	canine	เเบงค์	Male	Mixed	13	Mass from skin	Mast cell tumor grade 2	>8years	Mixed breed
1182	2016	P5951313	D16-2410	canine	เย็นลี่	Female	Mixed	5	Mass at the dorsal of neck	Trichoblastoma (Trabecular cell type)	≤8years	Mixed breed
1183	2016	P5625102	D16-2463	canine	เหม่เหม	Female	Shitzu	10	Mass at trunk and tail	Squamous cell carcinoma	>8years	Purebred
1184	2016	P57333963	D16-1024	canine	Ditto		Miniature	13	Skin mass	Mast cell tumor grade 2	>8years	Purebred
1185	2016	P5948924	D16-1428	canine	น้ำหวาน	Female	Pit bull	7	Skin mass	Cutaneous hemangiosarcoma	≤8years	Purebred
1186	2016	P5950073	D16-1876	canine	โกโก้	Male	Cocker Spaniel	9	Skin mass	Sabaceous adenoma	>8years	Purebred
1187	2016	P5842653	D16-1902	canine	ฮีโร่	Male	Poodle	14	Mass at scrotum	Mast cell tumor grade 2 with mast cell tumor metastasis	>8years	Purebred
1188	2016	P5734891	D16-0335	canine	Ginger	Female	LR	10	Mass at the upper eyelid	​Meibomian gland epithelioma	>8years	Purebred
1189	2016	P5844862	D16-0009	canine	ทูโทน	Male	Mixed	7	Mass at upper lip	Malignant melanoma	≤8years	Mixed breed
1190	2016	P5945148	D16-0461	canine	ศรีอ้วน	Female	Mixed	12	Mass at left HL	Undifferentiated sarcoma	>8years	Mixed breed
1191	2016	P5413014	D16-0621	canine	บุ้งกี๋	Male	Poodle	12	Cerebrum, Cerebellum	Oligodendroglioma	>8years	Purebred
1192	2016	P5947438	D16-0890	canine	คาราเมล	Male	Mixed	13	Mass at left lower lip	Oral malignant melanoma	>8years	Mixed breed
1193	2016	P5947463	D16-2191	canine	ดำ	Male	Mixed	8	Mass at digit (Bone)	Osteochondroma was highly suspected	≤8years	Mixed breed
1194	2016	P5522984	D16-0361	canine	โจโจ้	Female	Spitz	9	Skin mass	Squamous cell carcinoma	>8years	Purebred
1195	2016	P5945324	D16-0945	canine	Lilo	Male	Mixed	15	Skin mass	Mast cell tumor grade 2	>8years	Mixed breed
1196	2016	P5948061	D16-1123	canine	หนูเเดง	Female	Poodle	14	Mass at liver	Cholangiocarcinoma	>8years	Purebred
1197	2016	P5408506	D16-1852	canine	ข้าวตู	Female	GR	10	Skin mass	Infiltrative lipoma	>8years	Purebred
1198	2016	P5950419	D16-2029	canine	มอมเเมม	Female	Mixed		Skin mass	Mast cell tumor grade 2		Mixed breed
1199	2016	P5951916	D16-2615	canine	ลักกี้	Female	Mixed	17	Mass at ventral thorax and interdigital of left HL	Mast cell tumor grade 2	>8years	Mixed breed
1200	2016	P5625272	D16-0074	canine	อังกอล์	Male	Mixed	5	Mass at third digit	Papilloma	≤8years	Mixed breed
1201	2016	P5840747	D16-0674	canine	บุญนำพา	Male	Mixed	5	Mass at left HL	Apocrine gland carcinoma	≤8years	Mixed breed
1202	2016	P5945529	D16-0247	canine	นวล	Female	Mixed	11	Skin mass at the left elbow	Fibrosarcoma	>8years	Mixed breed
1203	2016	P5843760	D16-0390	canine	ขาว	Male	Mixed	12	Skin mass at cervical area	Fibrosarcoma was highly suspected	>8years	Mixed breed
1204	2016	P5946897	D16-0783	canine	ฮิปโป	Male	Cocker Spaniel	13	Mass at ear pinna	Sebaceous gland epithelioma	>8years	Purebred
1205	2016	P5947508	D16-0946	canine	มอมเเมม	Female	Mixed	13	Mass at abdomen	Mast cell tumor grade 2	>8years	Mixed breed
1206	2016	P5947508	D16-0946	canine	มอมเเมม	Female	Mixed	13	Mass at left FL	Cutaneous melanocytoma	>8years	Mixed breed
1207	2016	P5842149	D16-0910	canine	ลีลี่	Male	GR	11	Mass at perianal area	Apocrine gland adenocarcinoma	>8years	Purebred
1208	2016	P5842149	D16-0910	canine	ลีลี่	Male	GR	11	Mass at perianal area	Hepatoid gland adenoma	>8years	Purebred
1209	2016	P5945961	D16-0481	canine	ฮาเล่	Male	Dachshund	6	Mass at liver	Lymphom was highly suspected	≤8years	Purebred
1210	2016	P5945950	D16-0480	canine	มิ	Male	Mixed	6	Mass at left HL	Mast cell tumor with sebaceous gland dysplasia	≤8years	Mixed breed
1211	2016	P5945922	59 B 32	canine	ฟรังเฟรีย	Female	Mixed		Splenic mass	Splenic lymphoma is suggusted		Mixed breed
1212	2016	P5947283	D16-0871	canine	จิ้นส้ม	Male	Mixed	9	Mass at left HL	Lipoma	>8years	Mixed breed
1213	2016	P5947490	D16-1049	canine	เฮง เฮง	Female	Mixed	11	Mass at perianal area	Hepatoid gland adenoma with ductal differentiation	>8years	Mixed breed
1214	2016	P5949358	D16-1608	canine	บัดดี้	Male	GR	8	Mass at lateral thorax	Collagenous hamartomas	≤8years	Purebred
1215	2016	P5949088	D16-1505	canine	จูมง	Female	Poodle	9	Vaginal mass	Fibroma	>8years	Purebred
1216	2016	P5946379	D16-1504	Feline	เเอ๋ว	Female	DSH	3	Vaginal mass	Leiomyoma	≤8years	Mixed breed
1217	2016	P5949115	D16-1526	Feline	พลอย	Female	DSH		Mass at left side of thorax	Fibrosarcoma associated with multinucleated giant cell infiltration		Mixed breed
1218	2016	P5731247	D16-1213	canine	บีทเทิ้ล	Female	Schnauzer	9	Mass at left ear	Trichoblastoma (ribbon type)	>8years	Purebred
1219	2016	P5949981	D16-1853	canine	เเบมบี	Female	Mixed	1	Mass the descending colon	Leiomyoma	≤8years	Mixed breed
1220	2016	P5951048	D16-2349	canine	น้องผี	Male	Mixed		Nasal mass	Trasmissible venereal tumor (TVT)		Mixed breed
1221	2016	P5950552	D16-2469	canine	Black	Male	Mixed	5	Mass at left HL	Cutaneous melanoma	≤8years	Mixed breed
1222	2016	P5951217	D16-2378	canine	โรมิโอ	Male	GR	5	Mass at tongue	Hemangiosarcoma	≤8years	Purebred
1223	2016	P5302086	D16-0349	canine	คอฟฟี่	Male	Mixed	9	Mass at abdomen	Mast cell tumor grade 2	>8years	Mixed breed
1224	2016	P5734729	D16-0348	canine	คาวบอย	Male	Mixed	21	Mast at right ear	Squamous cell carcinoma	>8years	Mixed breed
1225	2016	P5733923	D16-1663	canine	ไอติม	Male	Poodle	11	Mass at forehead (Upper left eyelid)	Cutaneous melanocytoma	>8years	Purebred
1226	2016	P5950838	D16-2208	canine	โมจิ	Female	GR	10	Mass at right cervical area	Adenocarcinoma was highly suspected	>8years	Purebred
1227	2016	P5952027	D16-2643	canine	เฉาก๊วย	Female	Poodle		Mass at right ear canal	Mast cell tumor and squamous cell carcinoma		Purebred
1228	2016	P5730761	D16-1543	canine	น้องดำ	Female	Mixed	14	Skin mass	Trichoepithelioma	>8years	Mixed breed
1229	2016	P5946489	D16-0572	canine	คำเอ้ย	Female	Shitzu	12	Skin mass	Squamous cell carcinoma	>8years	Purebred
1230	2016	P5947688	D16-0896	canine	หมี	Male	Mixed	3	Mast at intestine	Leiomyoma	≤8years	Mixed breed
1231	2016	P5843772	D16-1174	canine	มันนี่	Female	GR	8	Mast at right perianal area	Leiomyosarcoma	≤8years	Purebred
1232	2016	P5946868	D16-1075	canine	หมูดำ	Female	Mixed	>10	Mass at right buccal area	Leiomyoma	>8years	Mixed breed
1233	2016	P5950403	D16-2154	canine	จ๋อย	Female	Mixed	8	Right ovary	Granulosa cell tumor	≤8years	Mixed breed
1234	2016	P5950403	D16-2154	canine	จ๋อย	Female	Mixed	8	Left ovary	Leiomysarcoma with cyst	≤8years	Mixed breed
1235	2016	P5950403	D16-2154	canine	จ๋อย	Female	Mixed	8	Uterus and cervix	Leiomyosarcoma	≤8years	Mixed breed
1236	2016	P5950403	D16-2154	canine	จ๋อย	Female	Mixed	8	Ovarian mass	Granulosa cell tumor	≤8years	Mixed breed
1237	2016	P5935516	D16-2142	canine	Black	Male	Mixed	5	Mass at left leg	Basal cell tumor	≤8years	Mixed breed
1238	2016	P5950895	D16-2306	canine	เต๋ย		Mixed		Mass at right axillary area	Mast cell tumor grade 2		Mixed breed
1239	2016	P5949688	D16-1914	canine	ครัวซอง	Female	Poodle	10	Vaginal mass	Leiomyoma	>8years	Purebred
1240	2016	P5948910	D16-2141	canine	น้ำตาล	Female	Poodle	10	Nasal mass	Osteosarcoma	>8years	Purebred
1241	2016	P5949650	D16-1916	canine	หยก	Female	Mixed	16	Vaginal mass	Fibrosarcoma	>8years	Mixed breed
1242	2016	P5950124	D16-1940	canine	Panda	Female	American bully	5	Mass at right HL	Cutaneous hemangiosarcoma	≤8years	Purebred
1243	2016	P5950175	D16-2028	canine	ปังปอนด์	Male	LR	10	Mass at ventral part of the tail	Hepatoid gland carcinoma	>8years	Purebred
1244	2016	P5949550	D16-2063	canine	บลูเลเบิ้ล	Female	Mixed	9	Mass in oral cavity	Amelanotic melanoma	>8years	Mixed breed
1245	2016	P5949876	D16-1989	canine	บีบี	Female	Miniature	9	Mass at the urinary bladder	Transitional cell carcinoma (TCC),papillary infiltrative type	>8years	Purebred
1246	2016	P5949856	D16-1915	canine	วาว่า	Female	Chihuahua	16	Mass at the right maxillary area	Acanthomatous ameloblastoma (acanthomatous epulis)	>8years	Purebred
1247	2016	P5946332	D16-1962	Feline	ตุ้มเม้ง	Male	DSH	15	Mass at ventral part of neck	Mixed apocrine carcinoma	>8years	Mixed breed
1248	2016	P5945359	D16-0739	canine	ข้าวเม่า	Female	Mixed	14	Mass at liver	Hepatocellular carcinoma ( solid with clear-cell type)	>8years	Mixed breed
1249	2016	P5837319	D16-1829	canine	ขนมครก	Female	Poodle	11	Mass at vulva and vagina	Multicentric leiomyomas(Leiomyofibromatosis)	>8years	Purebred
1250	2016	P5842219	D16-1768	canine	หมูยอ	Female	Poodle	12	Mass at right nasal tract	Canine nasal chondrosarcoma	>8years	Purebred
1251	2016	P5949753	D16-1801	canine	สำลี	Female	Mixed		Skin mass	Lipoma		Mixed breed
1252	2016	P5949327	D16-1769	canine	หวาน	Female	Mixed	8	Mass at right hip	schwannoma	≤8years	Mixed breed
1253	2016	P5945363	D16-1725	canine	ทองก้อน	Female	Thai Ridgeback	4	Mass at left metacarpus	Cutaneous plasma cell tumor	≤8years	Purebred
1254	2016	P5948868	D16-1460	canine	สีนิล	Male	Mixed	10	Mass at right axillary area	Cutaneous lymphoma was highly suspected	>8years	Mixed breed
1255	2016	P5948650	D16-1482	canine	กุนเชียง	Female	Cocker Spaniel	12	Mass at left perianal area	Perianal gland adenocarcinoma	>8years	Purebred
1256	2016	P5735130	D16-1544	canine	ชิชาง	Male	Mixed	11	Skin mass	Apocrine gland adenocarcinoma (complex type)	>8years	Mixed breed
1257	2016	P5948593	D16-1484	canine	ร็อดดิก	Male	Mixed		Mass at digit	Mast cell tumor grade 2		Mixed breed
1258	2016	P5946325	D16-1527	canine	เต่าทอง	Male	Mixed	17	Mass at prepuce	Mast cell tumor grade 2	>8years	Mixed breed
1259	2016	P5303313	D16-1688	canine	ไซโก้	Female	GR	13	Mass at left axillary area	Mast cell tumor grade 2	>8years	Purebred
1260	2016	P5949399	D16-1687	canine	ปังปอน	Male	Bangkaew	11	Mass at right axillary area	Mast cell tumor grade 2	>8years	Purebred
1261	2016	P5625543	D16-1340	canine	หมูตุ๋น	Female	GR	5	Mass at ventral part of neck	Localized histiocytic sarcoma	≤8years	Purebred
1262	2016	P5948703	D16-1339	canine	ยุกยิก	Female	Mixed	14	Lymph node	Lymphadinitis with simple mammary gland carcinoma (Solid type) metastasis	>8years	Mixed breed
1263	2016	P5948691	D16-1341	canine	ช็อคโกเเลต	Male	Mixed	8	Mass at skin	Cutaneous melanoma was highly suspected	≤8years	Mixed breed
1264	2016	P5946016	D16-0424	canine	ลาเกอร์	Male	Poodle	12	Skin mass at lumbar and left HL	Squamous cell carcinoma	>8years	Purebred
1265	2016	P5839884	D16-1320	canine	แอนดี้	Male	Siberian Husky	12	Splenic mass	Hemangiosarcoma	>8years	Purebred
1266	2016	P5945005	D16-0037	canine	น้ำข้าว	Male	Poodle	5	Mass at soft palate	Malignant melanoma	≤8years	Purebred
1267	2016	P5946557	D16-0598	canine	ปีใหม่	Male	Mixed	8	Mass at the perianal area	Lipoma	≤8years	Mixed breed
1268	2016	P5946043	D16-0924	canine	บัดดี้	Female	Mixed	3	Mass at vulva	Infiltrative lipoma	≤8years	Mixed breed
1269	2016	P5843342	D16-0822	canine	เเจ๊คกี้	Male	Beagle	1	Mass at chin	Papilloma	≤8years	Purebred
1270	2016	P5945197	D16-0120	Feline	ดาร์ลี่	Male	DSH	1	Mass	Mesothelioma (Epitheloid)	≤8years	Mixed breed
1271	2016	P5946209	D16-0525	canine	เอ็ม	Male	Bangkaew	13	Mass at right HL	Mast cell tumor grade 2	>8years	Purebred
1272	2016	P5946985	D16-0820	Feline	ลัคกี้	Male	DSH	7	Nasal mass	Melanoma with epidermal ulceration was highly suspected	≤8years	Mixed breed
1273	2016	P5302036	D16-1175	canine	อาฟูก	Female	Chihuahua	8	Mass at interdigital area of HL	Mast cell tumor grade 2	≤8years	Purebred
1274	2016	P5946080	D16-0441	canine	กุ้ยช่าย	Female	GR	9	Mass at left upper lip	Oral malignant melanoma	>8years	Purebred
1275	2016	P5946080	D16-0440	canine	กุ้ยช่าย	Female	GR	9	Mass at the left HL	Sebaceous gland adenoma with squamous cells metaplasia	>8years	Purebred
1276	2016	P5410104	D16-1190	canine	ลักกี้	Male	Mixed	7	Mass at the perianal area	Apocrine adenocarcinoma	≤8years	Mixed breed
1277	2016		D16-0948	canine	โคล่า	Female	Mixed	14	Mass at the digit of right HL	Fibrosarcoma	>8years	Mixed breed
1278	2016	P5948269	D16-1189	canine	Spiky	Male	GR	12	Mass at the right axillary area	Malignant melanoma	>8years	Purebred
1279	2016	P5948269	D16-1189	canine	Spiky	Male	GR	12	Skin mass	Apocrine carcinoma	>8years	Purebred
1280	2016	P5948269	D16-1189	canine	Spiky	Male	GR	12	Skin mass	Lipoma	>8years	Purebred
1281	2016	P5948269	D16-1189	canine	Spiky	Male	GR	12	Testis	Sertoli cell tumor (diffuse form)	>8years	Purebred
1282	2016	P5946205	D16-0573	canine	ซีอิ๊ว	Female	Bangkaew	13	Mass at the perianal area	Anal sac gland carcinomas	>8years	Purebred
1283	2016	P5948260	D16-1109	canine	เเพนดี้	Female	Bangkaew	4	Mass at abdomen	Mesothelioma (Epitheloid)	≤8years	Purebred
1284	2016	P5840903	D16-1001	canine	Lucky	Female	Pug	8	Mass at the mandible	Histiocytoma	≤8years	Purebred
1285	2016	P5840903	D16-1001	canine	Lucky	Female	Pug	8	Submandibular lymph node	Lymphadenitis with histiocytoma metastasis	≤8years	Purebred
1286	2016	P5730054	D16-0986	canine	พีพี	Male	Mixed	14	Mass at the right axillary area	Melanoma was highly suspected	>8years	Mixed breed
1287	2016	P5730054	D16-0986	canine	พีพี	Male	Mixed	14	Lymph node	Lymphadenitis with melanoma metastasis	>8years	Mixed breed
1288	2016	P5948379	D16-1202	canine	ทู่	Male	Mixed	14	Mass at distal of left radius (Bone)	Osteosarcoma	>8years	Mixed breed
1289	2016	P5412012	D16-0907	canine	ไมโจ	Male	LR	12	Mass at the right hindlimb	Osteosarcoma	>8years	Purebred
1290	2016	P5947504	D16-1090	Feline	น้องเหรียญ	Female	DSH	14	Mass at the upper eyelid	Malignant melanoma	>8years	Mixed breed
1291	2016	P5946332	D16-0897	Feline	ตุ้มเม้ง	Male	Persian	15	Mass at ear	Apocrine gland carcinoma	>8years	Purebred
1292	2016	P5945254	D16-0158	canine	ป๋อง	Male	Pekngese	8	Mass at tail and prepuce	Hepatoid gland adenoma	≤8years	Purebred
1293	2016	P5307920	D16-0075	canine	กังฟู		Mixed	12	Mass at the plantar of HL	Lipoma	>8years	Mixed breed
1294	2016	P5734729	D16-0781	canine	คาวบอย	Male	Mixed	21	Mass at the ventral part of the neck	Salivary gland adenoma	>8years	Mixed breed
1295	2016	P5946485	D16-0575	canine	Pitzi	Female	Shitzu	14	Mass at cervical area	Mast cell tumor grade 2	>8years	Purebred
1296	2016	P5520789	D16-0597	canine	ดอลล่า	Female	Cocker Spaniel	10	Skin mass at the dorsal trunk	Cutaneous liposarcomas	>8years	Purebred
1297	2016	P5945309	D16-0767	canine	มะลิ	Female	Mixed	5	Mass at the right lateral trunk	Lipoma	≤8years	Mixed breed
1298	2016	P5945309	D16-0767	canine	มะลิ	Female	Mixed	5	Mass at right axillary area	Mast cell tumor grade 2	≤8years	Mixed breed
1299	2016	P5945668	D16-0460	canine	ติ๊ก	Male	Mixed	5	Oral mass	Oral malignant melanoma	≤8years	Mixed breed
1300	2016	P5945604	D16-0272	canine	บุญก้ำ	Female	Mixed	14	Skin mass	Mast cell tumor grade 2	>8years	Mixed breed
1301	2016	P5945322	D16-0157	canine	สโนว์	Female	Poodle	13	Mass at vulva, lymph node	Mast cell tumor grade 2 with metastasis	>8years	Purebred
1302	2016	P5626633	D16-0279	canine	โตโต้	Male	GR		Mass at the lower eyelid of OS	Meibomian gland carcinoma		Purebred
1303	2016	P5844241	D16-0287	canine	ถุงทอง	Male	Mixed	4	Mass at penis	Transmissible venereal tumor (TVT) was highly suspected diagnosis	≤8years	Mixed breed
1304	2016	P5945759	D16-0314	canine	โก้ง	Male	Mixed	10	Mass at penis	Squamous cell carcinoma	>8years	Mixed breed
1305	2016	P5628983	D16-0076	canine	โมจิ	Female	Mixed	6	Mass at ventral thoracic area	Mast cell tumor grade 2	≤8years	Mixed breed
1306	2016	P5844094	D16-0128	Feline	สุขโข	Male	DSH	8	Mass at right ear	Feline cutaneous mast cell tumor	≤8years	Mixed breed
1307	2016	P5843058	D16-0089	canine	ตังเม	Female	Mixed	14	Mass at right ear canal	Basosquamous carcinoma	>8years	Mixed breed
1308	2016	P5303313	D16-0038	canine	ไซโก้	Female	GR	13	Skin mass at axillary area	Mast cell tumor grade 2	>8years	Purebred
1309	2016	P5303851	D16-1360	canine	ตาล	Female	Mixed	11	Vaginal mass	Fibrosarcoma	>8years	Mixed breed
1310	2016	P5844378	D16-1429	canine	หมูเเฮม	Male	Shitzu	10	Skin mass	Trichoblastoma (ribbon type)	>8years	Purebred
1311	2016	P5948570	D16-1245	canine	กุ้ชชี่	Female	Shitzu	13	Mass at vagina	Fibroma	>8years	Purebred
1312	2016	P5300522	D16-1347	canine	ส้มป่อย	Male	Miniature	12	Mass at gingiva	Malignant melanoma was highly suspected	>8years	Purebred
1313	2016	P5947281	59 B 77	canine	ข้าวปั้น		Mixed		Skin mass	Mast cell tumor, high grade		Mixed breed
1314	2016	P5946499	D16-0574	canine	จานสี	Male	Poodle	16	Skin mass at dorsal trunk	Trichoepitheliomas	>8years	Purebred
1315	2016	P5946034	D16-0423	canine	ลาเต้	Female	GR	7	Mass at the eyelid	Malignant melanoma	≤8years	Purebred
1316	2016	P5302790	D16-0288	canine	บูม	Male	Mixed	4	Mass at the perianal area	Hepatoid gland adenoma	≤8years	Mixed breed
1317	2016	P5735657	59 B 127	canine	หนูจิ๋ว	Male	Miniature	15	Skin mass	Perianal gland adenoma		Purebred
1318	2016	P5519955	59 B120	canine	โมจิ	Male	Poodle	14	Skin mass	Sebaceous epithelioma		Purebred
1319	2016	P5519955	D16-1406	canine	โมจิ	Male	Poodle	14	Skin mass	Sebaceous epithelioma	>8years	Purebred
1320	2016	P5735657	D16-1459	canine	หนูจิ๋ว	Male	Miniature	15	Mass at left perianal area	Hepatoid gland adenoma	>8years	Purebred
1321	2017	P6003300	D17-2513	canine	สิงห์ดำ	Male	Mixed	4	Mass at mandible area	Malignant melanoma	≤8years	Mixed breed
1322	2017	P6005351	D17-1033	canine	หล้า	Female	Poodle	10	Mass at urinary bladder	Transitional cell carcinoma, papillary, non-infiltrating	>8years	Purebred
1323	2017	P6003340	D17-0563	canine	ขนุน	Male	Mixed	9	Mass at the oral cavity	Malignant melanoma	>8years	Mixed breed
1324	2017	P5518078	D17-1366	canine	โชกุน	Male	GR	10	Mass in the ear canal	Histocytoma	>8years	Purebred
1325	2017	P5003161	D17-0427	canine	มิคกี้	Female	Mixed	12	Mass at the right ovary	Ovarian adenocarcinoma	>8years	Mixed breed
1326	2017	P6002456	D17-0168	canine	ลาเต้	Male	Mixed	14	Mass at the soft palate	Malignant malanoma	>8years	Mixed breed
1327	2017	P5951874	D17-0765	canine	คีเวล	Male	Shitzu	11	Mass at lower incisor	Acanthomatous ameloblastoma (acanthomatous epulis)	>8years	Purebred
1328	2017	P6000612	D17-1568	canine	ไบรท์	Male	Mixed	14	Mass at spleen and liver	Hepatocellular carcinoma with metastasis	>8years	Mixed breed
1329	2017	P5730834	D17-0329	canine	ฮังเล	Female	Mixed	12	Mass at spleen	Hemangioma	>8years	Mixed breed
1330	2017	P6004619	D17-0938	canine	มูมู่	Female	Mixed	9	Mass at urinary bladder	Transitional cell carcinoma, papillary, infiltrating	>8years	Mixed breed
1331	2017	P6005377	D17-1805	canine	เฮงเฮง	Male	Mixed	7	Mass at nasal cavity	Chondosarcoma	≤8years	Mixed breed
1332	2017	P6007845	D17-1872	canine	ลาภ	Male	Bangkaew	14	Mass at the dorsal part of tongue	Melignant melanoma	>8years	Purebred
1333	2017	P6008711	D17-2226	canine	สิงโต	Female	Mixed	12	Mass at supergingival area	Acanthomatous ameloblastoma (acanthomatous epulis)	>8years	Mixed breed
1334	2017	P6003401	D17-0713	canine	บราวนี่	Female	Shitzu	9	Mass at caudal lung lobe	Adenocarcinoma	>8years	Purebred
1335	2017	P6004270	D17-0750	canine	โกโก้	Male	GR	5	Mass at the oral cavity	Fibrosarcoma	≤8years	Purebred
1336	2017	P6004547	D17-2712	canine	ข้าวเม่า	Male	Chihuahua	3	Mass at spleen	Lymphoma	≤8years	Purebred
1337	2017	P6006888	D17-1599	canine	จุ้นจ้าน	Male	Shitzu	11	Mass at left forelimb	Undifferentiated sarcoma	>8years	Purebred
1338	2017	P5308227	D17-3064	canine	ฟีโน่	Male	Mixed	10	Mass at the gingiva	Fibrosarcoma	>8years	Mixed breed
1339	2017	P6006135	D17-1268	Hamster	หมูอ้วน	Male		1	Mass at ear	Squamous cell carcinoma (SCC)	≤8years	Mixed breed
1340	2017	P6008368	D17-2103	Feline	บัวขาว	Male	วิเชียรมาศ	2	Mass at the right abdomen	Histocytic sarcoma	≤8years	Purebred
1341	2017	P6009434	D17-2507	Feline	มอมแมม	Female	DSH	1	Mass at right thoracic area	Fibroma	≤8years	Mixed breed
1342	2017	P6010256	D17-2740	Feline	แพรว	Female	DSH	8	Mass at the ear pinna	Squamous cell carcinoma (SCC)	≤8years	Mixed breed
1343	2017	P6009434	D17-3004	Feline	มอมแมม	Female	DSH	1	Skin mass at the right abdomen	Fibrosarcoma	≤8years	Mixed breed
1344	2017	P5733660	D17-3019	Feline	วุ๊นจุ่น	Male	DSH	2	Mass at nasal cavity	Fibroma	≤8years	Mixed breed
1345	2017	P6008366	D17-2085	canine	น้ำหวาน	Female	Shitzu	11	Mass at ventral part of neck	Canine eosinophillic granuloma	>8years	Purebred
1346	2017	P6002466	D17-0182	canine	Jalaw	Male	Mixed	16	Mass at oral cavity	Melignant melanoma	>8years	Mixed breed
1347	2017	P5902062	D17-0086	canine	ฮาร์ดดิสก์	Male	Poodle	12	Mass at oral cavity	Melignant melanoma	>8years	Purebred
1348	2017	P5730608	D17-0241	canine	ชาร์คกี้	Female	Mixed	12	Mass at abdomen	Adenocarcinoma	>8years	Mixed breed
1349	2017	P6005188	D17-1134	canine	ฮิปโป	Male	Dachshund	4	Mass at the hard palate	Melanoma	≤8years	Purebred
1350	2017	P6009724	D17-2992	Feline	Miruko	Female	DSH	11	Skin mass	Mass cell tumor	>8years	Mixed breed
1351	2017	P6005484	D17-2228	canine	น้ำตาล	Female	Mixed	8	Mass in abdomen and adhesion to spleen	Leiomyosarcoma	≤8years	Mixed breed
1352	2017	P6008971	D17-2320	canine	ยักษ์	Male	Rottweiler	7	Mass in Bone	Osteosarcoma	≤8years	Purebred
1353	2017	P6007704	D17-1919	canine	บราวนี่	Male	Mixed	8	Mass at spleen	Lymphoma	≤8years	Mixed breed
1354	2017	P6004526	D17-0813	canine		Female	Pomeranian	15	Mass at vagina	Fibroma	>8years	Purebred
1355	2017	P6008639	D17-2192	canine	ขาว	Male	Mixed	8	Mass at testis	Sertoli cell tumor	≤8years	Mixed breed
1356	2017	P5302000	D17-2068	canine	คิตตี้	Female	Mixed	12	Mass at right lateral neck area	Sebaceous gland adenoma	>8years	Mixed breed
1357	2017	P6004255	D17-0782	canine	ลูฟี่	Male	Siberian	12	Mass at testis	Seminoma	>8years	Purebred
1358	2017	P6003264	D17-0511	canine	บะหมี่	Male	Mixed	18	Mass at spleen	Hemangiosarcoma	>8years	Mixed breed
1359	2017	P5304368	D17-1345	canine	Maron	Female	Mixed	12	Mass at nasal cavity	Osteosarcoma	>8years	Mixed breed
1360	2017	P5838818	D17-0710	canine	คูก้า	Male	Mixed	18	Mass at oral	Fibroma	>8years	Mixed breed
1361	2017	P6005882	D17-1215	canine	สเปน	Female	Shitzu	6	Mass at stomach (Pyloric antrum)	Tubulopapillary adenoma	≤8years	Purebred
1362	2017	P6007603	D17-1810	canine	โชคดี	Female	Miniature	7	Mass at vagina	Fibroma	≤8years	Purebred
1363	2017	P5303267	D17-1871	canine	มีมี่	Female	Mixed	12	Mass at the right ear canal	Ceruminoud gland cacinoma	>8years	Mixed breed
1364	2017	P5303267	D17-1871	canine	มีมี่	Female	Mixed	12	Mass at the right ear	Squamous cell carcinoma (SCC)	>8years	Mixed breed
1365	2017	P6011495	CHM350	canine	มดดำ	Female	Shitzu	9	Hepatic mass	Hepatocellular carcinoma	>8years	Purebred
1366	2017	P5910220029	CHM298	canine	เป๋าฮื้อ	Female	Pomeranian	9	Splenic mass	Hemangiosarcoma	>8years	Purebred
1367	2017	P6010972	CHM369	canine	ลักกี้	Male	Mixed	10	Testicular mass	Seminoma	>8years	Mixed breed
1368	2017	P6009077	D17-2347	canine	นีโม่	Male	Poodle	14	Mass at perianal area	Squamous cell carcinoma	>8years	Purebred
1369	2017	P5734891	D17-1071	canine	Ginger	Female	Labrador Retriever	11	Mass at gingiva	Fibromatous epulis	>8years	Purebred
1370	2017	P6004619	D17-2280	canine	มูมู่	Female	Mixed	9	Mass at left kidney	Transitional cell carcinoma	>8years	Mixed breed
1371	2017	P6007714	D17-1859	canine	โบนัส	Male	Poodle	10	Mass at perianal area	Hepatoid gland carcinoma	>8years	Purebred
1372	2017	P6007496	D17-1833	canine	Mary	Female	Mixed	11	Skin mass (Ear)	Squamous cell carcinoma	>8years	Mixed breed
1373	2017	P6004521	D17-1857	canine	อั่งเปา	Female	Golden Retriever	12	Skin mass at thorax	Lipoma	>8years	Purebred
1374	2017	P6004521	D17-1857	canine	อั่งเปา	Female	Golden Retriever	12	Skin mass at right hindlimb	Basal cell carcinoma	>8years	Purebred
1375	2017	P5950172	D17-0353	Hedgehog	ไข่ตุ๋น	Female		3	Skin mass at neck	Lipoma	≤8years	Mixed breed
1376	2017	P6006867	D17-1509	canine	โมจิ	Female	Poodle	13	Mass at vagina	Leiomyosarcoma	>8years	Purebred
1377	2017	P6004856	D17-0899	canine	ดุ๊กดิ๊ก	Female	Mixed	13	Mass at urinary bladder	Transitional cell carcinoma	>8years	Mixed breed
1378	2017	P5896671	D17-0877	canine	ติงลี่	Male	Mixed	10	Mass at abdomen	Leiomyosarcoma	>8years	Mixed breed
1379	2017	P5896671	D17-0877	canine	ติงลี่	Male	Mixed	10	Mass at urinary bladder	Leiomyosarcoma	>8years	Mixed breed
1380	2017	P5306030	D17-0587	Feline	แดง	Male	DSH	11	Skin mass at face	Thichoepithelioma	>8years	Mixed breed
1381	2017	P60034037	D17-0553	Feline	สีนวล	Female	DSH	7	Skin mass	Fibrosarcoma	≤8years	Mixed breed
1382	2017	P5842219	D17-0366	canine	หมูยอ	Female	Poodle	13	Mass at nasal cavity	Chrondroma	>8years	Purebred
1383	2017	P6004585	D17-2278	canine	เปียกปูน	Male	Bangkaew	6	Liver mass	Hepatocellular carcinoma (Solid)	≤8years	Purebred
1384	2017	P6005249	D17-1469	Feline	Jesse	Male	Maine Coon	11	Mass at urinary bladder	Transitional Cell Carcinoma	>8years	Purebred
1385	2017	P6004704	D17-1132	Feline	ดำมี่	Male	DSH	7	Oral mass (median canthus)	Melanoma	≤8years	Mixed breed
1386	2017	P6008206	D17-2366	canine	ก๊องแก๊ง	Male	Shitzu	13	Oral mass (Mandible)	Malignant melanoma	>8years	Purebred
1387	2017	P6009130	D17-2741	canine	Lelo	Female	Mixed	10	Oral mass (Tounge)	Malignant melanoma	>8years	Mixed breed
1388	2017	P6010065	D17-2731	canine	Holly	Female	Mixed	13	Oral mass (Gingiva)	Malignant melanoma	>8years	Mixed breed
1389	2017	P6003222	D17-0458	Hamster	Hamster	Male		4 mo	Oral mass	Myxoma	≤8years	Mixed breed
1390	2017	P5949706	D17-1712	canine	ถ้วยฟู	Male	Shitzu	6	Oral mass (lower lip)	Malignant melanoma	≤8years	Purebred
1391	2017	P5516893	D17-0374	canine	มันนี่	Male	Shitzu	11	Oral mass	Amelanotic melanoma	>8years	Purebred
1392	2017	P5946491	D17-1976	canine	อัลมอนต์	Male	Shitzu	10	Mass at left ear	Plasmacytoma	>8years	Purebred
1393	2017	P6007721	D17-1832	canine	มารวย	Male	Mixed	15	Mass at left perianal area	Hepatoid gland carcinoma	>8years	Mixed breed
1394	2017	P6005296	D17-1935	canine	เฉาก๊วย	Female	Mixed	7	Mass at right Hindlimb	Hemangiopericytoma	≤8years	Mixed breed
1395	2017	P6009060	D17-2368	canine	ลีลา	Female	Mixed	8	Mass at neck	Hemangioma	≤8years	Mixed breed
1396	2017	P6008852	D17-2277	canine	ลักกี้	Male	Syberian	9	Mass at tail	Hepatoid gland carcinoma	>8years	Purebred
1397	2017	P5412042	D17-2304	canine	นุ่น	Female	Mixed	11	Mass at left forelimb	Mast cell tumor grade 2	>8years	Mixed breed
1398	2017	P5842910	D17-1191	canine	อั่งเปา	Male	Mixed	9	Mass at dorsal anus	Hepatoid gland adenoma	>8years	Mixed breed
1399	2017	P5300756	D17-0586	canine	โรตี	Female	Mixed	7	Mass at the eyelid	Squamous cell carcinoma	≤8years	Mixed breed
1400	2017	P6004183	D17-0715	canine	รถถัง	Female	Mixed	14	Mass at upper eyelid	Sebaceous gland adenoma	>8years	Mixed breed
1401	2017	P6002539	D17-0654	canine	เสงี่ยม	Male	Syberian	5	Mass at lower eyelid	Transmissible venereal tumor (TVT)	≤8years	Purebred
1402	2017	P5900787	D17-2141	canine	น้องแพนด้า	Female	Mixed	5	Mass at right Hindlimb	Fibroma	≤8years	Mixed breed
1403	2017	P5900787	D17-2141	canine	น้องแพนด้า	Female	Mixed	5	Mass at right lumbosacrum	Histiocytic sarcoma	≤8years	Mixed breed
1404	2017	P5517855	D17-2476	canine	บัดดี้	Female	Golden Retriever	10	Mass at the right scapular area	Hemangiopericytoma (low grade)	>8years	Purebred
1405	2017	P5302681	D17-0543	canine	ฮิปโป	Female	Mixed	9	Mass at left abdomen	Lipoma	>8years	Mixed breed
1406	2017	P6002351	D17-0046	canine	โทน	Male	Cocker Spanial	10	Mass at left forelimb (elbow)	Hemangioma	>8years	Purebred
1407	2017	P6006903	D17-1534	canine	ซออู้	Male	Shitzu	6	Mass at tail	Squamous cell carcinoma	≤8years	Purebred
1408	2017	P5623207	D17-0766	canine	อุ่นเรือน	Female	Mixed	14	Mass at inguinal area	Giant cell tumor	>8years	Mixed breed
1409	2017	P5623207	D17-0766	canine	อุ่นเรือน	Female	Mixed	14	Mass at neck	Lipoma	>8years	Mixed breed
1410	2017	P6003554	D17-0602	canine	รถด่วน	Male	splitz	17	Mass at perianal area	Hepatoid gland adenoma	>8years	Purebred
1411	2017	P5910100067	D17-2165	canine	เต๋ย	Female	Mixed	10	Skin mass	Mast cell tumor grade 2	>8years	Mixed breed
1412	2017	P5950149	D17-1424	canine	แพนด้า	Female	Mixed	13	Mass at lateral trunk	Lipoma	>8years	Mixed breed
1413	2017	P6006114	D17-1350	canine	หมูแดง	Female	Mixed	14	Mass at right tibia	Fibrosarcoma	>8years	Mixed breed
1414	2017	P6002857	D17-0318	canine	สุดหล่อ	Male	Cocker Spanial	9	Mass at left forelimb	Fibroma	>8years	Purebred
1415	2017	P5304800	D17-1455	canine	ไจแอ้น	Male	Mixed	9	Mass at the ventral thoracic	Lipoma	>8years	Mixed breed
1416	2017	P5304800	D17-1455	canine	ไจแอ้น	Male	Mixed	9	Mass at the left hindlimb	Fibroma with cyst	>8years	Mixed breed
1417	2017	P6003336	D17-1552	canine	ชิชา	Female	Mixed	12	Mass at vagina	Fibrosarcoma	>8years	Mixed breed
1418	2017	P6009407	D17-2540	canine	หมี	Male	Rottweiler	13	Mass at sublumbar	Histiocytic sarcoma	>8years	Purebred
1419	2017	P6010784	D17-2978	canine	บาชี	Female	Mixed	9	Mass at right axillary area	Fibroma	>8years	Mixed breed
1420	2017	P6010784	D17-2978	canine	บาชี	Female	Mixed	9	Mass at right tibia	Undifferentiated sarcoma	>8years	Mixed breed
1421	2017	P6005484	D17-1785	canine	น้ำตาล	Female	Mixed	8	Mass at left axillary	Fibrosarcoma	≤8years	Mixed breed
1422	2017	P6003607	D17-0751	canine	ลัก	Female	Mixed	8	Skin mass at back	Lipoma	≤8years	Mixed breed
1423	2017	P6006509	D17-1471	canine	โอเลี้ยง	Male	Mixed	15	Mass at ventral thorax	Hemangiopericytoma	>8years	Mixed breed
1424	2017	P5300321	D17-0040	canine	Gypsy	Female	Labrador Retriever	9	Mass at left elbow	Mast cell tumor was highly suspected	>8years	Purebred
1425	2017	P6002340	D17-0087	canine	โอวัลติน	Male	Mixed	13	Mass at scrotal sac	Mast cell tumor grade 2	>8years	Mixed breed
1426	2017	P5623391	D17-1652	canine	กล้วยไข่	Female	Shitzu	11	Mass at perianal area	Malignant melanoma	>8years	Purebred
1427	2017	P6003648	D17-0940	canine	ซาลาเปา	Male	Golden Retriever	13	Skin mass	Cutaneous histiocytoma	>8years	Purebred
1428	2017	P6006734	D17-1694	canine	ดุ๊กดิ๊ก	Female	Mixed	8	Skin mass at right tarsal joint	Mast cell tumor grade 2	≤8years	Mixed breed
1429	2017	P6003431	D17-0604	canine	ลักกี้	Male	Labrador Retriever	3	Mass at ventral thoracic area	Lipoma	≤8years	Purebred
1430	2017	P6004247	D17-0798	canine	ร่ำรวย	Male	Shitzu	13	Mass at prepuce	Hepatoid gland adenoma	>8years	Purebred
1431	2017	P5300136	D17-0382	canine	ทอง	Male	Mixed	10	Mass at right axillary area	Hemangioma	>8years	Mixed breed
1432	2017	P6006388	D17-1413	canine	ซีซ่า	Female	Golden Retriever	10	Skin mass at abdomen	Lipoma	>8years	Purebred
1433	2017	P6005702	D17-1349	canine	มอคค่า	Male	Shitzu	7	Mass at anus	Hepatoid gland carcinoma	≤8years	Purebred
1434	2017	P6005315	D17-1075	canine	นวล	Female	Mixed	13	Mass at perianal area	Hemangiopericytoma	>8years	Mixed breed
1435	2017	P6002546	D17-0226	canine	น้องปูด	Female	Mixed	45 days	Mass at skull	Peripheral nerve sheath tumor	≤8years	Mixed breed
1436	2017	P5900645	D17-1347	canine	ยาหยี	Female	Pug	10	Mass at right phalangx	Squamous cell carcinoma	>8years	Purebred
1437	2017	P5901824	D17-0634	canine	เฟื่องฟ้า	Female	Mixed	8	Skin mass at lumbar	Trichoepithelioma with cyst	≤8years	Mixed breed
1438	2017	P6006065	D17-1934	canine	ฟ้าใส	Female	Mixed	10	Skin mass	Mast cell tumor grade 2	>8years	Mixed breed
1439	2017	P5518078	D17-1936	canine	โชกุน	Male	Golden Retriever	10	Mass at right lateral area	Cutaneous histiocytoma	>8years	Purebred
1440	2017	P5902122	D17-2189	canine	แอปเปิ้ล	Female	Poodle	10	Mass at abdomen	Hemangiosarcoma	>8years	Purebred
1441	2017	P6006888	D17-1761	canine	จุ้นจ้าน	Male	Shitzu	11	Mass at left forelimb	Hemangiopericytoma	>8years	Purebred
1442	2017	P6009322	D17-3020	canine	ฟี	Male	Siberian	9	Mass at left axillary	Lipoma	>8years	Purebred
1443	2017	P6010762	D17-3031	canine	บุญศรี	Male	Labrador Retriever	9	Mass at left thoracic	Mast cell tumor grade 2	>8years	Purebred
1444	2017	P6006276	D17-2845	canine	ออมทรัพย์	Female	Shitzu	9	Mass at the left perianal area	Hepatoid gland carcinoma	>8years	Purebred
1445	2017	P6008255	D17-2067	canine	หนามเตย	Female	Labrador Retriever	11	Mass at left forelimb	Osteosarcoma	>8years	Purebred
1446	2017	P6004182	D17-0834	canine	ปุ๊บปั๊บ	Male	Chihuahua	7	Mass at kidney	Renal adenocarcinoma	≤8years	Purebred
1447	2017	P5900027	D17-0709	canine	ที่รัก	Male	Chihuahua	8	Oral mass	Malignant melanoma	≤8years	Purebred
1448	2017	P6002456	D17-0373	canine	ลาเต้	Male	Mixed	14	Oral mass	Squamous cell carcinoma poor differentiated	>8years	Mixed breed
1449	2017	P6005291	D17-1192	canine	Jack	Male	Rottweiler	5	Mass at the gingiva	Fibromatous epulis	≤8years	Purebred
1450	2017	P5901898	D17-2604	canine	มะลิ	Female	Mixed	9	Mass at urinary bladder	Transitional cell carcinoma, papillary infiltrative type	>8years	Mixed breed
1451	2017	P6005188	D17-1365	canine	ฮิปโป	Male	Dachshund	4	Mass at nasal cavity	Histiocytoma	≤8years	Purebred
1452	2017	P6009130	D17-2479	canine	Lelo	Female	Mixed	10	Mass at tongue	Malignant amelanotic melanoma	>8years	Mixed breed
1453	2017	P6008628	D17-2188	canine	โกโก้	Male	Poodle	14	Mass at testis	Seminoma	>8years	Purebred
1454	2018	P6115679	D18-0961	canine	เเบคแฮม	Male	Poodle	16	Mass at prostate gland	Urothelial cell carcinoma	>8years	Purebred
1455	2018	P6116892	D18-1346	canine	แดง	Female	Mixed	4	Oral mass	Squamous papilloma	≤8years	Mixed breed
1456	2018	P6116665	D18-1302	canine	ทิกกี้	Female	Mixed	10	Skin mass	Mast cell tumor , low grade	>8years	Mixed breed
1457	2018	P5951417	CHM293	canine	ตุ้ยตุ้ย	Male	Shitzu	15	Nasal mass	Papillary nasal adenocarcinoma	>8years	Purebred
1458	2018	P6011114	CHM341	canine	ซูกัส	Female	Mixed	7	Skin mass	Mast cell tumor , low grade	≤8years	Mixed breed
1459	2018	P6121509	CHM511	canine	ออดี้	Female	Poodle	4	Skin mass	Mast cell tumor , low grade	≤8years	Purebred
1460	2018	P6119768	CHM522	canine	Copter	Male	Golden Retrever	5	Penile mass	Squamous papilloma	≤8years	Purebred
1461	2018	P6121224	CHM501	canine	กันดั้ม	Male	Bangkaew		Mass at skin	Inverteed papilloma		Purebred
1462	2018	P6121750	CHM39	canine	Rascal	Male	Boston-terrier	7	Mass at skin	Sebaceous adenocarcinoma	≤8years	Purebred
1463	2018	P6112689	CHM027	canine	เฉาก๊วย		Mixed	7	Mass at skin	Papillary adenocarcinoma of apocrine gland	≤8years	Mixed breed
1464	2018	P6012126	CHM002	canine	สำลี	Female	Mixed	9	Mass at vagina	Leiomyoma	>8years	Mixed breed
1465	2018	P5910100033	CHM076	canine	โกโก้	Male	Mixed	10	Nasal mass	Nasal adenocarcinoma	>8years	Mixed breed
1466	2018	P6117738	CHM58	canine	ฮ่องเต้	Male	Mixed	10	Subcutaneous mass	Lipoma	>8years	Mixed breed
1467	2018	P6121634	CHM64	canine	อเดล	Female	Mixed	2	Subcutaneous mass	Liposarcoma	≤8years	Mixed breed
1468	2018	P6112964	CHM053	canine	กุ๊กกิ๊ก	Female	Mixed	10	Skin mass	Mast cell tumor , low grade	>8years	Mixed breed
1469	2018	P6112355	CHM041	canine	วูฟ	Male	Siberian	10	Mass at ear	Papillary Cystic adenoma of ceruminous gland	>8years	Purebred
1470	2018	P5521843	CHM104	canine	ม่อน	Male	Mixed	10	Skin mass	Perianal gland adenoma	>8years	Mixed breed
1471	2018	P6113711	CHM103	Feline	ธันวา	Female	DSH	2	Nasal mass	Squamous cell carcinoma		Mixed breed
1472	2018	P6114259	CHM127	canine	บูบู้	Male	Mixed	10	Right ulna	Multlobulated Osteochondromatosis	>8years	Mixed breed
1473	2018		CHM156	canine	ซอนย่า	Female	Doberman	7	Skin mass	Benign perpheral nerve sheath tumor	≤8years	Purebred
1474	2018	P6008398	CHM143	canine	กระปุก	Female	Poodle	6	Skin mass	Cavernous hemangioma	≤8years	Purebred
1475	2018	P6011326	CHM146	canine	วีโก้	Male	Mixed		Skin mass	Perianal adenoma		Mixed breed
1476	2018	P6114622	CHM181	canine	ชินจัง	Male	Shitzu		Skin mass	Perianal gland adenoma		Purebred
1477	2018	P6115234	CHM169	canine	โซดา	Male	Shitzu	8	Skin mass	Perianal gland adenoma	≤8years	Purebred
1478	2018	P6115977	CHM213	canine	ข้าวตู	Female	Mixed	3	Subcutaneous mass	Lipoma	≤8years	Mixed breed
1479	2018	P6113752	CHM215	canine	แบคแฮม	Male	Golden Retrever	7	Skin mass	Mast cell tumor , high grade	≤8years	Purebred
1480	2018	P6116215	CHM202	canine	แองเจิ้ล	Female	Golden Retrever	12	Skin mass	Fibrosarcoma	>8years	Purebred
1481	2018	P6112781	CHM196	canine	พอลล่า	Female	Mixed	13	Skin mass	Mast cell tumor, low grade	>8years	Mixed breed
1482	2018	P6116165	CHM197	canine	Mild red	Female	Mixed		Skin mass	Mast cell tumor, low grade		Mixed breed
1483	2018	P6116086	CHM242	Feline	มีมี่	Female	Persian	7	Uterus	Leiomyoma	≤8years	Purebred
1484	2018	P6117329	CHM288	canine	บ๊อบบี้	Male	Mixed	1	Skin mass	Sebaceous epithelioma	≤8years	Mixed breed
1485	2018	P6115944	CHM294	Feline	ลายโต้เต้	Female	DSH		Skin mass	Fibroma		Mixed breed
1486	2018	P6117642	CHM309	Feline	เด่น	Female	DSH	5	Subcutaneous mass	Fibrosarcoma	≤8years	Mixed breed
1487	2018	P6117778	CHM319	canine	คิคุชิโอ๊ะ	Male	American Bully	7 mo	Skin mass	Mast cell tumor, high grade	≤8years	Purebred
1488	2018	P6117643	CHM316	Feline	ห้าแต้ม	Female	DSH	12	Skin mass	Fibrosarcoma	>8years	Mixed breed
1489	2018	P6116802	CHM340	Feline	มะลิ	Female	DSH		Oral mass	Squamous cell carcinoma		Mixed breed
1490	2018	P6113682	CHM396	canine	ดอลล่า	Female	Golden Retrever	11	Skin mass	Squamous cell carcinoma	>8years	Purebred
1491	2018	P6119778	CHM423	canine	ลูกชิ้น	Male	Mixed	7	Skin mass	Extragenital Canine Transmissible Venereal Tumor	≤8years	Mixed breed
1492	2018	P6119778	CHM423	canine	ลูกชิ้น	Male	Mixed	7	Subcutaneous mass	Lipoma	≤8years	Mixed breed
1493	2018	P5900524	CHM388	canine	ไฮเตอร์	Male	Mixed	10	Testicular mass	Seminoma	>8years	Mixed breed
1494	2018	P6118500	CHM359	canine	ปังปอนด์	Male	Poodle	14	Skin mass	Squamous papilloma	>8years	Purebred
1495	2018	P5307783	CHM370	canine	น้องเล็ก	Male	Shitzu	10	Skin mass	Sebaceous epithelioma	>8years	Purebred
1496	2018	P6119735	CHM416	canine	แวนด้า	Female	Shitzu	8	Vaginal mass	Vaginal fibroma	≤8years	Purebred
1497	2018	P6120391	CHM446	canine	ไข่เจียว		Mixed		Skin mass	Mast cell tumor, low grade		Mixed breed
1498	2018	P5521211	CHM454	canine	ไอรอน		Mixed		Skin mass	Squamous cell carcinoma		Mixed breed
1499	2018	P6120121	CHM431	canine	ชาพีช	Female	Beagle	5	Skin mass	Cavernous hemangioma	≤8years	Purebred
1500	2018	P5302098	CHM486	canine	Locker	Male	Labrador	15	Skin mass	Basal cell carcinoma	>8years	Purebred
1501	2018	P6121236	CHM489	canine	Duxty	Male	Mixed	6 mo	Popliteal lymph node	Follicular lymphoma, low grade	≤8years	Mixed breed
1502	2018	P6121304	CHM492	canine	หมูหวาน	Female	Golden Retrever	8	Skin mass	Benign peripheral nerve sheath tumor	≤8years	Purebred
1503	2018	P6121197	CHM497	canine	สิงห์	Male	Mixed	9	Skin mass	Squamous cell carcinoma, well differentiated type	>8years	Mixed breed
1504	2018	P5305957	CHM498	canine	พุตตาล	Male	Labrador	9	Skin mass	Dermatofibroma	>8years	Purebred
1505	2018	P6120857	CHM471	canine	บ๊อบบี้	Female	Mixed		Subcutaneous mass	Mast cell tumor		Mixed breed
1506	2018	P6120857	CHM472	canine	บ๊อบบี้	Female	Mixed		Ovarian mass	Papillary adenocarcinoma		Mixed breed
1507	2018	P6121551	CHM520	canine	ปีโป้	Male	Golden Retrever	7	Soft palate mass	Benign peripheral nerve sheath tumor	≤8years	Purebred
1508	2018	P5949735	CHM499	canine	บอล	Male	Mixed	11	Subcutaneous mass	Lipoma	>8years	Mixed breed
1509	2018	P6121076	CHM477	Feline	เหมียวเหมียว	Female	DSH	2	Nasal mass	Osteosarcoma	≤8years	Mixed breed
1510	2018	P6120909	BKK473	Feline	เป่าเปา	Female	DSH	11	Skin mass	Pilomatricoma	>8years	Mixed breed
1511	2018	P6113068	D18-1198	canine	รถถัง	Male	French bulldogs	5	Mass at scrotal sac	Mast cell tumor, low grade	≤8years	Purebred
1512	2018	P6116420	D18-1217	canine	หยวน	Female	Shitzu	10	Subcutaneous mass	Infiltrative lipoma	>8years	Purebred
1513	2018	P6116485	D18-1218	canine	บีบี้	Male	Shitzu	14	Mass at face	Sebacous epithelioma	>8years	Purebred
1514	2018	P5812219	D18-1221	canine	หมูยอ	Female	Poodle	14	Mass in nasal cavity	Chondroma	>8years	Purebred
1515	2018	P6116121	D18-1093	Feline	คิตตี้	Female	DSH	2	Thoracic mass	Lymphoma	≤8years	Mixed breed
1516	2018	P6113711	D18-1092	Feline	ธันวา	Female	DSH	2	Mass at left facial area	Osifying fibroma	≤8years	Mixed breed
1517	2018	P5910080023	D18-0865	canine	กาแรม	Male	Shitzu	11	Mass at perianal area	Hepatoid gland epithelioma	>8years	Purebred
1518	2018	P6115436	D18-0881	canine	จุ้งเอ๋	Female	Pomeranian	10	Vaginal mass	Leiomyoma	>8years	Purebred
1519	2018	P6114580	D18-0904	canine	Mu Mu	Male	Golden Retrever	15	Mass at lumbar area	Pilomatricoma	>8years	Purebred
1520	2018	P6003627	D18-0933	canine	พัตเตอร์	Male	Golden Retrever	8	Mass at rostral mandible	Ossifying fibroma	≤8years	Purebred
1521	2018	P5301967	D18-0988	canine	ดุ๊กดิ๊ก	Male	Beagle	14	Mass at right pinna	Cutaneous histiocytoma	>8years	Purebred
1522	2018	P5305132	D18-0992	canine	โอวัลติน	Male	Mixed	17	Mass at testis	Seminoma	>8years	Mixed breed
1523	2018	P5305132	D18-0992	canine	โอวัลติน	Male	Mixed	17	Mass at liver	Clear cell hepatocellular carcinoma	>8years	Mixed breed
1524	2018	P6115300	D18-1024	canine	ข้าวตู	Female	Pomeranian	9	Mass at larynx	Plasmacytoma	>8years	Purebred
1525	2018	P6115830	D18-1026	canine	โกโก้	Male	Pitbull	8	Mass at peri-penis area	Mast cell tumor grade 2	≤8years	Purebred
1526	2018	P6115891	D18-1027	canine	ชิโร่	Male	Mixed	5	Mass in abdominal cavity	Epitheloid mesothelioma (Solid subtype)	≤8years	Mixed breed
1527	2018	P6116515	D18-1231	canine	เหยิน	Male	Mixed	11	Nasal mass	Transitional cell carcinoma	>8years	Mixed breed
1528	2018	P5950889	D18-1112	canine	แมม	Female	Mixed	9	Ovarian mass	Granulosa cell tumors	>8years	Mixed breed
1529	2018	P6116249	D18-1134	canine	หมูปิ้ง	Male	Mixed	4	Mass at prepuce and lymph node	Mast cell tumor high grade with metastasis	≤8years	Mixed breed
1530	2018	P6012037	D18-1135	canine	คานิ	Female	Golden Retrever	10	Oral mass	Melanocytoma	>8years	Purebred
1531	2018	P5409560	D18-1136	canine	Lucky	Male	Golden Retrever	9	Skin mass at dorsal trunk	Mast cell tumor high grade	>8years	Purebred
1532	2018	P6011499	D18-1246	canine	รอนนิน	Female	Labrador	11	Skin mass	Sebaceous epithelioma	>8years	Purebred
1533	2018	P5900347	D18-1249	canine	มีมี่	Male	Yorkshire	11	Mass at tongue	Amelanotic melanoma	>8years	Purebred
1534	2018	P6115300	D18-1916	canine	ข้าวตู	Female	Pomeranian	9	Mass at laryngeal saccule	Lymphoma	>8years	Purebred
1535	2018	P6118307	D18-1928	canine	ท้าวทอง	Female	Mixed	10	Skin mass	Lipoma	>8years	Mixed breed
1536	2018	P5302915	D18-1930	canine	ซูโม่	Female	Mixed	10	Mass at lateral forelimb	Peripheral nerve sheath tumor	>8years	Mixed breed
1537	2018	P6007447	D18-1956	canine	Luna	Female	Shitzu	2	Ovarian mass	Ovarian adenoma	≤8years	Purebred
1538	2018	P6118045	D18-1995	canine	Rocky	Male	Mixed	6	Nasal mass	Squamous cell carcinoma	≤8years	Mixed breed
1539	2018	P6118396	D18-1996	canine	เรนาด	Male	Mixed	5	Mass at sublingual area	Rhabdomyoma	≤8years	Mixed breed
1540	2018	P6118639	D18-2082	canine	อองอิน	Male	Siberian	6	Skin mass at pelvic	Fibroma	≤8years	Purebred
1541	2018	P6118765	D18-2136	canine	เคย์	Male	Bangkaew	12	Mass at perianal area	Hepatoid gland epithelioma	>8years	Purebred
1542	2018	P6118641	D18-2137	canine	ละออน	Female	Mixed	10	Mass at urinary bladder	Leiomyoma	>8years	Mixed breed
1543	2018	P6117746	D18-1712	canine	เจ้ค	Male	Labrador	8	Oral mass	Melanocytoma	≤8years	Purebred
1544	2018	P5302198	D18-1753	canine	ทองหยอด	Male	Mixed	10	Oral mass	Amelanoblastoma	>8years	Mixed breed
1545	2018	P6117773	D18-1765	canine	Yoyo	Female	Mixed	5	Nasal mass	Malignant melanoma	≤8years	Mixed breed
1546	2018	P6117764	D18-1768	canine	ไอซ์	Male	Shitzu	11	Mass at ear	Ceruminous gland adenocarcinoma	>8years	Purebred
1547	2018	P6118021	D18-1821	canine	ดาด้า	Female	Mixed	10	Mass at left forelimb	Squamous cell carcinoma	>8years	Mixed breed
1548	2018	P6114460	D18-1822	canine	ทอง	Female	Mixed	10	Mass at vulva	Mast cell tumor	>8years	Mixed breed
1549	2018	P6117169	D18-1532	canine	ข้าวสวย	Female	Golden Retrever	5	Mass at dorsal trunk	Hemangiosarcoma	≤8years	Purebred
1550	2018	P6005475	D18-1533	canine	แจ๊กกี้	Female	Golden Retrever	13	Mass at neck	Follicular lymphoma	>8years	Purebred
1551	2018	P6116356	D18-1562	canine	สแปโร่	Male	Pitbull	9	Mass at prepuce	Hemangiosarcoma	>8years	Purebred
1552	2018	P6112936	D18-1646	canine	ขนมปัง	Female	Pug	8	Skin mass	Mast cell tumor, low grade	≤8years	Purebred
1553	2018	P6119281	D18-2480	canine	ลักกี้	Male	Mixed	14	Oral mass	Malignant melanoma	>8years	Mixed breed
1554	2018	P6119593	D18-2507	canine	สตางค์	Female	Pomeranian	8	Mass at left forelimb	Trichoepithelioma	≤8years	Purebred
1555	2018	P6117333	D18-2508	canine	ช็อคกี้	Female	Labrador	11	Mass at thoracic area	Peripheral nerve sheath tumor	>8years	Purebred
1556	2018	P6119592	D18-2509	canine	จิงเกอเบล	Female	Chihuahua	2	Subcutaneous mass	Lipoma	≤8years	Purebred
1557	2018	P5951874	D18-2176	canine	คีเวล	Male	Shitzu	12	Mass at perianal area	Hepatoid gland adenoma	>8years	Purebred
1558	2018	P6118772	D18-2183	canine	ไข่ตุ๋น	Male	Mixed	13	Skin mass	Basal cell carcinoma	>8years	Mixed breed
1559	2018	P6118921	D18-2185	canine	ลิ้นจี่	Male	Mixed	6	Mass at neck	Squamous cell carcinoma	≤8years	Mixed breed
1560	2018	P6118921	D18-2185	canine	ลิ้นจี่	Male	Mixed	6	Skin mass at tight	Mast cell tumor, high grade	≤8years	Mixed breed
1561	2018	P6118951	D18-2230	canine	สาลี่	Female	Pug	6	Skin mass at anus	Amelanotic melanoma	≤8years	Purebred
1562	2018	P6118045	D18-2253	canine	Rocky	Male	Mixed	6	Nasal mass	Squamous cell carcinoma	≤8years	Mixed breed
1563	2018	P6119080	D18-2274	canine	Sita	Female	Schnauzer	15	Mass at right buccal area	Oral malignant melanoma	>8years	Purebred
1564	2018	P6118782	D18-2303	canine	หนุน	Female	Mixed	6	Mass at vagina	Transmissible venereal tumors	≤8years	Mixed breed
1565	2018	P6119040	D18-2308	canine	น้องดำ	Female	Mixed	8	Mass at axillary area	Mast cell tumor, high grade	≤8years	Mixed breed
1566	2018	P6117183	D18-2332	canine	หมั่นโถ	Male	Spitz	10	Subcutaneous mass at axillary	Lipoma	>8years	Purebred
1567	2018	P5307757	D18-2340	canine	เบอร์ดี้	Male	Mixed	10	Mass at axillary area	lipoma	>8years	Mixed breed
1568	2018	P5307757	D18-2340	canine	เบอร์ดี้	Male	Mixed	10	Mass at testis	Seminoma	>8years	Mixed breed
1569	2018	P6773547	D18-2389	canine	ซูซิ	Female	Shitzu	8	Mass at vagina	Transmissible venereal tumors	≤8years	Purebred
1570	2018	P6119201	D18-2435	canine	โบ๊ท	Male	Shitzu	9	Oral mass	Seminoma	>8years	Purebred
1571	2018	P6120929	D18-3008	canine	Lucky	Male	Golden Retrever	11	Skin mass	Malignant melanoma	>8years	Purebred
1572	2018	P6120647	D18-3024	canine	สมหวัง	Male	Mixed	6	Mass at neck	Basal cell carcinoma	≤8years	Mixed breed
1573	2018	P6120707	D18-3025	canine	สาวสวย	Female	Mixed	16	Mass at right cheek	Melanocytoma	>8years	Mixed breed
1574	2018	P6113997	D18-2658	canine	กาก้า	Female	Syberian	8	Mass at vagina	Leiomyoma	≤8years	Purebred
1575	2018	P5521211	D18-2834	canine	ไอรอน	Male	American Bully		Mass at penis	Squamous cell carcinoma, well differentiated type		Purebred
1576	2018	P6115944	D18-2624	Feline	ลายโต้เต้	Female	DSH	10	Mass at left chin	Fibrosarcoma	>8years	Mixed breed
1577	2018	P6118287	D18-2623	canine	ไมโล	Male	Mixed	10	Mass at perianal area	Hepatoid gland adenoma	>8years	Mixed breed
1578	2018	P6119320	D18-3166	canine	น้ำตาล	Male	Siberian	10	Mass at preputeal area	Peripheral nerve sheath tumor	>8years	Purebred
1579	2018	P6121567	D18-3211	canine	ดุกดิก	Male	Mixed	8	Mass at penis	Transmissible venereal tumors	≤8years	Mixed breed
1580	2018	P6116349	D18-3023	Feline	มารวย	Male	Persian	1	Skin mass	Lymphoma	≤8years	Purebred
1581	2018	P6121204	D18-3110	Feline	ป๊อกกี้	Female	DSH	4	Ovarian mass	Granulosa cell tumors	≤8years	Mixed breed
1582	2018	P6115099	D18-3067	canine	นิปปอน	Male	French bulldogs	6	Mass at testis	Sertoli cell tumor	≤8years	Purebred
1583	2018	P6121175	D18-3068	Feline	โคล่า	Male	DSH	4	Mass at thoracic area	Peripheral nerve sheath tumor	≤8years	Mixed breed
1584	2018	P6120299	D18-2835	canine	มูก้า	Male	French bulldogs	7	Mass at intestine	Cholangiocarcinoma	≤8years	Purebred
1585	2018	P6121292	D18-3167	canine	ปาล์มมี่	Female	Golden Retrever	10	Skin mass	Lipoma	>8years	Purebred
1586	2018	P6116086	D18-1390	Feline	มีมี่	Female	DSH	7	Mass at uterus	Calcified uterine leiomyoma	≤8years	Mixed breed
1587	2018	P6119671	D18-2519	canine	ข้าวปั้น	Female	Poodle	7	Mass at right ovary	Dyserminoma	≤8years	Purebred
1588	2018	P6121538	D18-3229	canine	กาละแม	Male	Miniature	9	Mass at lateral forelimb	Mast cell tumor	>8years	Purebred
1589	2018	P6114227	D18-1173	canine	ข้าวกล่ำ	Female	Mixed	8	Subcutaneous mass	Lipoma	≤8years	Mixed breed
1590	2018	P6118603	D18-2027	canine	ท๊อฟฟี่	Female	Shitzu	10		Squamous cell carcinoma	>8years	Purebred
1591	2018	P5734622	D18-0185	canine	Prize	Female	Mixed	4	Mass at cervical area	Squamous cell carcinoma	≤8years	Mixed breed
1592	2018	P6012191	D18-0086	canine	โมจิ	Female	Poodle	13	Mass at gingival	Plasma cell tumor	>8years	Purebred
1593	2018	P6112627	D18-0108	canine	ถ้วยทอง	Male	Shitzu	13	Mass at perianal area	Hepatoid gland epithelioma	>8years	Purebred
1594	2018	P6112344	D18-0109	canine	จิงโจ้	Female	Mixed	13	Oral mass	Squamous cell carcinoma	>8years	Mixed breed
1595	2018	P6112621	D18-0110	canine	เฟอร์รารี่	Female	Golden Retrever	13	Mass at thoracic area	Basosquamous cell carcinoma	>8years	Purebred
1596	2018	P6112706	D18-0153	canine	เฟี้ยว	Male	Mixed	13	Mass at cervical area	Sebaceous gland epithelioma	>8years	Mixed breed
1597	2018	P5841647	D18-0155	canine	ไมเคิล	Male	Mixed	7	Mass at lateral thoracic area	Lipoma	≤8years	Mixed breed
1598	2018	P5410706	D18-0156	canine	สายฟ้า	Male	Shitzu	6	Mass at testis	Seminoma	≤8years	Purebred
1599	2018	P5302262	D18-0697	canine	มิชา	Female	Bangkaew	8	Skin mass at thorax	Mast cell tumor grade 2	≤8years	Purebred
1600	2018	P6114460	D18-0708	canine	ทอง	Female	Mixed	10	Mass at vulva	Transmissible venereal tumors	>8years	Mixed breed
1601	2018	P6114028	D18-0543	canine	ดุ๊กดิ๊ก	Female	Mixed	10	Mass at left thorax	Mast cell tumor grade 2	>8years	Mixed breed
1602	2018	P6011487	D18-0544	canine	เฉาก๊วย	Male	Cocker Spaniel	16	Mass at prepuce	Hepatoid gland epithelioma	>8years	Purebred
1603	2018	P6011487	D18-0544	canine	เฉาก๊วย	Male	Cocker Spaniel	16	Mass at dorsal trunk	Hemangioma	>8years	Purebred
1604	2018	P6112813	D18-0262	canine	น้องนาย	Female	Mixed		Mass at shoulder	Mast cell tumor grade 2		Mixed breed
1605	2018	P6112813	D18-0262	canine	น้องนาย	Female	Mixed		Mass at caudal abdomen	Hemangioma		Mixed breed
1606	2018	P6003169	D18-0278	canine	ฟิโน่	Female	Golden Retrever	9	Skin mass	Lipoma	>8years	Purebred
1607	2018	P6113176	D18-0337	canine	ดุ๊กดิ๊ก	Female	Poodle	7	Mass at lefe paw	Sebaceous gland adenoma	≤8years	Purebred
1608	2018	P5410223	D18-0339	canine	ทองม้วน	Male	Mixed	14	Skin mass	Lipoma	>8years	Mixed breed
1609	2018	P6113387	D18-0355	canine	บ่อกี้	Male	Mixed	12	Skin mass	Mast cell tumor grade 2	>8years	Mixed breed
1610	2018	P6112936	D18-0461	canine	ขนมปัง	Male	Pug	8	Mass at the thigh	Mast cell tumor grade 2	≤8years	Purebred
1611	2018	P6009434	D18-0208	canine	มอมแมม	Female	Mixed	13	Skin mass	Fibrosarcoma	>8years	Mixed breed
1612	2018	P6011487	D18-0016	canine	เฉาก๊วย	Male	Cocker	16	Mass at tail	Hepatoid gland adenoma	>8years	Purebred
1613	2018	P5300136	D18-0041	canine	ทอง	Male	Mixed	10	Mass at right forelimp	Mast cell tumor grade 2	>8years	Mixed breed
1614	2018	P5346491	D18-0629	canine	อัลมอน	Female	Shitzu	10	Mass at ear	Histiocytoma	>8years	Purebred
1615	2018	P6114312	D18-0677	canine	แป๊ะกัง	Male	Mixed	9	Mass at anus	Hepatoid gland carcinoma	>8years	Mixed breed
1616	2018	P6115907	D18-1058	canine	จ๋อแจ๋	Female	Mixed	12	Skin mass at forelimb	Infiltrative lipoma	>8years	Mixed breed
1617	2018	P6011005	D18-0746	canine	ปุยฝ้าย	Male	Mixed	20	Anal mass	Hepatoid gland epithelioma	>8years	Mixed breed
1618	2018	P6114757	D18-0772	canine	จิ๋ว	Female	Mixed	10	Skin mass at head	Mast cell tumor grade 2	>8years	Mixed breed
1619	2018	P6007218	D18-0856	canine	Dui Dui	Female	Golden Retrever	4	Skin mass at ventral thoracic	Infiltrative lipoma	≤8years	Purebred
1620	2018	P6115794	D18-1157	canine	บ๊อก	Male	Mixed	9	Mass at penis	Transmissible venereal tumors	>8years	Mixed breed
1621	2018	P6116137	CHM206	canine	อู่ฟู่	Female	Mixed	15	Nasal mass	Squamous cell carcinoma	>8years	Mixed breed
1622	2018	P5520681	D18-1259	canine	Sydney	Female	Labrador	12	Mass at abdomen	Hemangiopericytoma	>8years	Purebred
1623	2018	P6117397	D18-1874	canine	คุโระ	Male	Mixed	14	Mass at abdomen	Mast cell tumor, low grade	>8years	Mixed breed
1624	2019	P6010418	D19-1534	canine	บราวนี่	Female	Mixed	12	Mass at rectum	Neuroendocrine tumor	>8years	Mixed breed
1625	2019	P6222145	D19-0163	Feline	เป๊ปซี่	Male	DSH	6	Mass at facial area	Complex and mixed apocrine carcinoma	≤8years	Mixed breed
1626	2019	P6224601	D19-1102	canine	BB	Male	Chihuahua	10	Mass at lateral trunk	Mast cell tumor, low grade	>8years	Purebred
1627	2019	P6224317	D19-1080	canine	พี่สาม	Female	Mixed	9	Mass at right axillary area	Mast cell tumor, low grade	>8years	Mixed breed
1628	2019	P6222768	D19-1187	canine	หนูแดง	Female	Mixed	10	Mass at thoracic area	Lipoma	>8years	Mixed breed
1629	2019	P6223777	D19-0791	canine	โมเซ่	Male	Bull terrier	12	Skin mass	Squamous cell carcinoma	>8years	Purebred
1630	2019	P6223989	D19-0868	canine	ปุ๊กกี้	Female	Poodle	10	Mass at right lumbar area	Infiltrative lipoma	>8years	Purebred
1631	2019	P6010177	D19-0924	canine	คุ้กกี้	Female	Mixed	15	Mass at right pinna	Sebaceous epithelioma	>8years	Mixed breed
1632	2019	P6117300	D19-0962	canine	เชียงใหม่	Male	Siberian	12	Mass at perianal area	Hepatoid gland carcinoma	>8years	Purebred
1633	2019	P6223744	D19-0727	canine	น้อยหน่า	Male	Poodle	14	Mass at right forelimb	Liposarcoma	>8years	Purebred
1634	2019	P6226702	D19-1972	canine	จัมโบ้	Female	Golden Retriever	12	Spleen	Hemagiosarcoma	>8years	Purebred
1635	2019	P6011111	D19-2074	canine	ป๊อป	Male	Mixed	11	Mass at hindlimb	Mast cell tumor, high grade	>8years	Mixed breed
1636	2019	P6225783	D19-2077	canine	ไมค์	Male	Mixed	2	Mass at thoracic area	Chondroblastic osteosarcoma	≤8years	Mixed breed
1637	2019	P6225591	D19-2085	canine	Taya	Female	Mixed	13	Oral mass	Fibrosarcoma	>8years	Mixed breed
1638	2019	P6225772	D19-1707	canine	น้ำบุศย์	Female	Thai Ridgeback	12	Skin mass at hindlimb	Mast cell tumor, low grade	>8years	Purebred
1639	2019	P6225732	D19-1602	canine	สีนวล	Male	Labrador	10	Nasal mass	Fibrosarcoma	>8years	Purebred
1640	2019	P6010970	D19-2310	canine	นินจา	Male	Mixed	10	Skin mass	Histiocytoma	>8years	Mixed breed
1641	2019	P6226570	D19-2155	Feline	ส้มหล่น	Female	DSH	16	Nasal mass	Squamous cell carcinoma	>8years	Mixed breed
1642	2019	P5306839	D19-2235	canine	นมชง	Male	Mixed	9	Mass at inguinal area	Lipoma	>8years	Mixed breed
1643	2019	P610050047	CHM421	canine	น้องหมี	Male	Mixed	10	Nasal mass	Nasal papillary adenocarcinomma	>8years	Mixed breed
1644	2019	P6009266	D19-2161	canine	อ้วน	Female	Mixed	5	Left Popliteal Lymph node	Lymphoma	≤8years	Mixed breed
1645	2019	P6227664	D19-2435	canine	โชเล่ย์	Male	Poodle	14	Mass at testis	Seminoma	>8years	Purebred
1646	2019	P6222080	D19-2183	canine	สิงโต	Male	Mixed	8	Nasal mass	Osteosarcoma	≤8years	Mixed breed
1647	2019	P6227303	D19-2198	canine	อ้อนแอ้น	Female	Labrador	12	Skin mass at hindlimb	Infiltrative lipoma	>8years	Purebred
1648	2019	P6227371	D19-2255	canine	เฉาก๊วย	Female	Mixed	12	Oral mass	Melanoma	>8years	Mixed breed
1649	2019	P6223487	D19-2182	canine	ดอลลาร์	Male	Shitzu	3	Mass at perianal area	Hepatoid gland adenoma	≤8years	Purebred
1650	2019	P6227573	D19-2353	canine	บับเบิ้ล	Male	Mixed	8	Mass at lateral trunk	Mast cell tumor, high grade	≤8years	Mixed breed
1651	2019	P6227459	D19-2312	canine	ลูกหยี	Female	Mixed	11	Subcutaneous mass at thoracic	Lipoma	>8years	Mixed breed
1652	2019	P5306351	D19-1858	canine	น้ำฝน	Female	Chihuahua	13	Skin mass	Mast cell tumor, low grade	>8years	Purebred
1653	2019	P5520570	D19-0094	canine	หมีอ้วน	Female	Labrador	5	Skin mass	Peripheral nerve sheath tumor	≤8years	Purebred
1654	2019	P5301790	D19-0097	canine	Blink	Female	Mixed	10	Subcutaneous mass at trunk	Infiltrative lipoma	>8years	Mixed breed
1655	2019	P6008440	D19-2160	canine	ถุงทอง	Male	Mixed	8	Mass at tail	Pleomorphic sarcoma	≤8years	Mixed breed
1656	2019	P6007062	D19-0300	canine	แฮปปี้	Female	Dachshund	11	Mass at anus	Hepatoid gland tumor	>8years	Purebred
1657	2019	P6224480	D19-1185	canine	ตุ๊กดิ๊ก	Male	Mixed	8	Oral mass	Amelanotic melanoma	≤8years	Mixed breed
1658	2019	P6121698	D19-0178	canine	ข้าวตู	Male	Yorkshire	14	Oral mass	Oral melanoma	>8years	Purebred
1659	2019	P6223355	D19-0684	canine	หนอน	Male	Mixed	12	Oral mass	Squamous cell carcinoma	>8years	Mixed breed
1660	2019	P6223667	D19-0721	canine	แพนด้า	Female	Terrier	12	Nasal mass	Acanthomatous ameloblastoma	>8years	Purebred
1661	2019	P6115627	D19-0717	canine	น้ำผึ้ง	Female	Pomeranian	12	Oral mass	Malignant melanoma	>8years	Purebred
1662	2019	P6006903	D19-0299	canine	ซออู้	Male	Shitzu	7	Skin mass	Infundibular keratinizing acanthoma	≤8years	Purebred
1663	2019	P6222261	D19-0315	canine	น้องหมี	Male	Mixed	9	Oral mass	Malignant melanoma	>8years	Mixed breed
1664	2019	P6221981	D19-0045	canine	เปียกปูน	Female	Mixed	12	Skin mass	Hemagioma	>8years	Mixed breed
1665	2019	P6121551	D19-0116	canine	ปีโป้	Male	Golden Retriever	7	Oral mass	Oral fibrosarcoma	≤8years	Purebred
1666	2019	P6222430	D19-0237	canine	Olive	Female	Mixed	1	Nasal mass	Transmissible veneral tumors	≤8years	Mixed breed
1667	2019	P6222911	CHM78	canine	บราวน์		Shitzu	15	Mass at testis	Seminoma	>8years	Purebred
1668	2019	P6222301	D19-0312	canine	ทุนด้า	Male	Mixed	12	Vaginal mass	Fibrosarcoma	>8years	Mixed breed
1669	2019	P6224616	D19-1100	canine	โอเลี้ยง	Female	Mixed	14	Vaginal mass	Leiomyoma	>8years	Mixed breed
1670	2019	P6117300	D19-0963	canine	เชียงใหม่	Male	Siberian	12	Mass at testis	Seminoma	>8years	Purebred
1671	2019	P6224176	D19-0926	canine	มายา	Female	Siberian	11	Mass at hindlimb	Hemangiosarcoma	>8years	Purebred
1672	2019	P6223395	D19-0886	canine	เดฟฟี่	Male	Mixed	7	Mass at testis	Seminoma and sertoli cell tumor	≤8years	Mixed breed
1673	2019	P6224301	D19-1471	canine	แซมโบ้	Male	Mixed	6	Oral mass	Mucoepidermal carcinoma	≤8years	Mixed breed
1674	2019	P6222363	D19-0585	canine		Male	Miniature	14	Oral mass	Oral melanoma	>8years	Purebred
1675	2019	P6225560	D19-1454	canine	ชาเย็น	Male	Poodle	16	Mass at testis	Seminoma	>8years	Purebred
1676	2019	P6223101	D19-0674	canine	มารวย	Male	Mixed	8	Mass at upper eyelid	Meibomian adenoma	≤8years	Mixed breed
1677	2019	P5303171	D19-0859	canine	Dina	Female	Mixed	10	Mass at heat base	Chemodectoma	>8years	Mixed breed
1678	2019	P6225035	D19-1350	canine	ตาล	Female	Mixed	10	Skin mass	Cutaneous hemangiosarcoma	>8years	Mixed breed
1679	2019	P5518851	D19-1105	canine	ซัมซุง	Male	Poodle	13	Skin mass	Trichoblastoma	>8years	Purebred
1680	2019	P6113069	D19-1351	canine	รักบี้	Male	Golden Retriever	12	Mass at forelimb	Melanoma	>8years	Purebred
1681	2019	P5517855	D19-1380	canine	บัดดี้	Female	Golden Retriever	12	Mass at neck	Infundibular keratinizing acanthoma	>8years	Purebred
1682	2019	P5900912	D19-1419	canine	น้องหนู	Female	Mixed	9	Subcutaneous mass	Lipoma	>8years	Mixed breed
1683	2019	P6224475	D19-1062	canine	โกโก้	Male	Mixed	12	Skin mass	Mast cell tumor, low grade	>8years	Mixed breed
1684	2019	P6224437	D19-0989	canine	บราวนี่	Male	Shitzu	13	Skin mass	Tricholemmoma	>8years	Purebred
1685	2019	P5412488	D19-0688	canine	โดเรมี	Female	Golden Retriever	8	Mass at left eye	Trichoblastoma	≤8years	Purebred
1686	2019	P6223381	CHM117	canine	โก	Male	Golden Retriever	13	Skin mass	Malignant amelanotic melanoma	>8years	Purebred
1687	2019	P5734571	D19-0096	canine	หมากี้	Female	Mixed	9	Skin mass	Mast cell tumors	>8years	Mixed breed
1688	2019	P6222543	D19-0273	canine	Rufus	Male	Mixed	6	Mass at eyelid	Melanoma	≤8years	Mixed breed
1689	2019	P6222543	D19-0273	canine	Rufus	Male	Mixed	6	Mass at hindlimb	Mast cell tumor, low grade	≤8years	Mixed breed
1690	2019	P6222552	D19-0377	canine	ทองหยอด	Male	Mixed	7	Mass at forelimb	Cutaneous histiocytoma	≤8years	Mixed breed
1691	2019	P6222145	D19-0141	canine	เต้าหู้	Male	Golden Retriever	6	Mass at right elbow	Fibrosarcoma	≤8years	Purebred
1692	2019	P6117144	D19-1841	canine	สุขกี้	Male	Bangkaew	13	Skin mass	Mast cell tumor , high grade	>8years	Purebred
1693	2019	P6226598	D19-1876	canine	แซนดี้	Female	Mixed	15	Skin mass	Cutaneous malignant melanoma	>8years	Mixed breed
1694	2019	P6225718	D19-1549	canine	ก๊วยเจ๋ง	Male	Bangkaew	15	Oral mass	Mast cell tumor, low grade	>8years	Purebred
1695	2019	P5842052	D19-1878	canine	นิก	Male	Mixed	12	Mass at thoracic area	Mast cell tumor, high grade	>8years	Mixed breed
1696	2019	P5522249	D19-1533	canine	ปันปัน	Male	Shitzu	12	Mass at lip	Cutaneous histiocytoma	>8years	Purebred
1697	2019	P6120830	D19-1898	canine	โอชิ	Male	Poodle	11	Skin mass at neck	Basosquamous carcinoma	>8years	Purebred
1698	2019	P6221828	D19-0177	canine	มิ	Male	Mixed		Mass at hindlimb	Mast cell tumor, high grade		Mixed breed
1699	2019	P6119163	CHM47	canine	ถุงทอง	Male	Mixed	7	Skin mass	Dermatofibroma	≤8years	Mixed breed
1700	2019	P6120857	CHM342	canine	บ๊อบบี้	Female	Mixed	13	Skin mass	Squamous cell carcinoma	>8years	Mixed breed
1701	2019	P6226858	CHM439	Feline	กาฟิว	Female	Persian	10	Skin mass	Squamous cell carcinoma	>8years	Purebred
1702	2019	P5518302	CHM93	Feline	Gucci	Male	DSH		Skin mass	Mast cell tumor, low grade		Mixed breed
1703	2019	P6118981	CHM422	canine	บรูโน่	Male	Mixed	11	Mass at eyelid	Cutaneous hemangioma	>8years	Mixed breed
1704	2019	P6225652	CHM266	canine	แพนด้า	Female	Mixed	11	Vaginal mass	Fibroma	>8years	Mixed breed
1705	2019	P6225478	CHM248	canine	ไมโล	Female	Shitzu	7	Mass at testis	Sertoli cell tumor	≤8years	Purebred
1706	2019		CHM296	canine	อ้วน	Male	Mixed	7	Mass at eyelid	Meibomian adenoma	≤8years	Mixed breed
1707	2019	P5623310	CHM243	canine	เต้าหู้	Male	Mixed	9	Oral mass	Acanthomatous epulis	>8years	Mixed breed
1708	2019	P6224438	CHM315	canine	Malteser	Male	Poodle		Oral mass	Acanthomatous epulis		Purebred
1709	2019	P6121547	CHM5	canine	กุ๊ชชี่	Female	Shitzu	11	Colo-rectal mass	Superficial colon carcinoma	>8years	Purebred
1710	2019	P6121397	CHM6	canine	ด๊อกแด๊ก	Female	Mixed	9	Skin mass	Fibrosarcoma	>8years	Mixed breed
1711	2019	P6224108	CHM286	canine	ชิวชิว	Male	Shitzu	15	Skin mass	Perianal adenoma	>8years	Purebred
1712	2019	P5301959	CHM279	canine	การ์ชง1	Male	Mixed	9	Skin mass	In situ squamous cell carcinoma	>8years	Mixed breed
1713	2019	P6225644	CHM253	canine	คุ้กกี้	Male	Shitzu	10	Skin mass	Ceruminous adenoma and squamous papilloma	>8years	Purebred
1714	2019	P6225265	CHM237	canine	ชิกกี้	Male	Mixed		Subcutaneous mass	Lipoma		Mixed breed
1715	2019	P6225820	CHM289	canine	ช็อคโกแลต	Male	Mixed	10	Subcutaneous mass	Lipoma	>8years	Mixed breed
1716	2019	P5900294	CHM210	canine	โอโม่	Male	Mixed	9	Oral mass	Squamous cell carcinoma, poorly differentiated type and osteossarcoma	>8years	Mixed breed
1717	2019	P6115345	CHM206	canine	ก๊วยเจ๋ง	Male	Mixed	6	Ocular mass	Extragenital Canine Transmissible Venereal Tumor	≤8years	Mixed breed
1718	2019	P6225970	CHM308	canine	ปุ๊กปิ๊ก	Female	Mixed	7	Subcutaneous mass	Cutaneous hemangiopericytoma	≤8years	Mixed breed
1719	2019	P6002571	CHM339	canine	แคบหมู	Female	Mixed	7	Skin mass	Malignant cutaneous histiocytoma	≤8years	Mixed breed
1720	2019	P6225593	CHM325	canine	แฮรี่	Male	Shitzu	14	Skin mass	Perianal adenoma	>8years	Purebred
1721	2019	P6223378	CHM307	canine	ทอมมี่	Male	Golden Retriever	10	Skin mass	Perianal adenoma	>8years	Purebred
1722	2019	P6225718	CHM277	canine	ก๊วยเจ๋ง1	Male	Bangkaew	15	Subcutaneous mass	Lipoma	>8years	Purebred
1723	2019	P6225980	CHM295	canine	มะเหมี่ยว	Female	Mixed	7	Skin mass	Sebaceous epithelioma and adenoma	≤8years	Mixed breed
1724	2019	P6226040	CHM300	canine	ฮันนี่	Female	Golden Retriever	7	Skin mass	Trichoblastoma	≤8years	Purebred
1725	2019	P6222390	CHM51	canine	ยับโร	Female	Mixed	6	Skin mass	Mast cell tumor, high grade	≤8years	Mixed breed
1726	2019	P6011182	CHM105	canine	ของหวาน	Female	Mixed	10	Skin mass	Mast cell tumor, high grade	>8years	Mixed breed
1727	2019	P6223553	CHM123	canine	นมจืด	Male	Mixed	15	Skin mass	Mast cell tumor, low grade	>8years	Mixed breed
1728	2019	P6283818	CHM133	canine	กาหลง	Female	Mixed	8	Skin mass	Mast cell tumor, low grade	≤8years	Mixed breed
1729	2019	P6003628	CHM2	canine	แพดดี้	Female	Golden Retriever	8	Skin mass	Squamous cell carcinoma, well differentiated type	≤8years	Purebred
1730	2019	P6224003	CHM200	canine	Maeby	Female	Beagle	8	Skin mass	Trichoblastoma	≤8years	Purebred
1731	2019	P6120427	CHM186	canine	ไข่ปิ้ง	Male	Chihuahua		Skin mass	Perianal adenoma		Purebred
1732	2019	P6223178	CHM96	canine	ชาบู	Male	Mixed	6	Testicular mass	Seminoma	≤8years	Mixed breed
1733	2019	P6222285	CHM50	canine	ชาโต้	Male	Mixed	4	Testicular mass	Sertoli cell tumor	≤8years	Mixed breed
1734	2019	P6222947	CHM130	canine	ฟาโรห์	Male	Mixed	10 mo	Capal bone mass	Osteochondroma	≤8years	Mixed breed
1735	2019	P6223825	CHM187	canine	ศรีนวล	Female	Mixed	5	Vaginal mass	Canine Transmissible Venereal Tumor	≤8years	Mixed breed
1736	2019	P6120308	CHM212	canine	โมจิ	Female	Mixed		Vaginal mass	Leiomyoma		Mixed breed
1737	2019	P6222714	CHM145	canine	เฮงเฮง	Male	Mixed	10	Testicular mass	Seminoma	>8years	Mixed breed
1738	2019	P6224802	CHM197	Feline	ฟีฟ่า	Female	DSH	1	Nasal mass	Nasal adenocarcinoma	≤8years	Mixed breed
1739	2019	P6224881	CHM198	canine	หน่อมแน่ม	Female	Poodle	10	Vaginal mass	Vaginal polyp and fibroma	>8years	Purebred
1740	2019	P5625830	CHM124	canine	ถุงทอง	Male	Shitzu	16	Oral mass	Malignant amelanotic melanoma	>8years	Purebred
1741	2019	P6223245	D19-0548	canine	ลูลู่	Female	Mixed	9	Skin mass	Cutaneous histiocytoma	>8years	Mixed breed
1742	2019	P6003625	D19-0723	canine	แบมบู	Male	Mixed	9	Subcutaneous mass	Lipoma	>8years	Mixed breed
1743	2019	P6223152	D19-0520	Hedgehog	แคระ	Male		4	Skin mass	Squamous cell carcinoma	≤8years	Mixed breed
1744	2019	P6224615	D19-1103	canine	แจส	Male	Mixed	6	Mass at left cheek	Trichoblastoma, ribbon type	≤8years	Mixed breed
1745	2019	P6224074	D19-1140	canine	เจ๋ง	Male	Mixed	7	Mass at rectum	Hepatoid gland adenoma	≤8years	Mixed breed
1746	2019	P6224767	D19-1141	canine	ปุ๊กกี้	Female	Poodle	12	Vaginal mass	Infiltrative lipoma	>8years	Purebred
1747	2019	P6011552	D19-0570	canine	บุญรอด	Male	Pomeranian	4	Mass at urinary bladder	Transitional cell carcinoma	≤8years	Purebred

## Sheet: Privot non-cmt biopsies
Animal	feline
ป้ายชื่อแถว	นับจำนวน ของ No
Adenocarcinoma	4
Adenoma	1
Anaplastic histiocytic sarcoma	1
Apocrine gland carcinoma	1
Complex and mixed apocrine carcinoma	1
Feline primary ocular sarcoma (Post-traumatic sarcoma)	1
Fibroma/Fibrosarcoma	14	1
Fibromatous epulis	1
Granulosa cell tumors	1
Histiocytic sarcoma	1
Leiomyoma	3
Lymphoma	2
Malignant melanoma	1
Mast cell tumor	3	4
Melanoma/Melanocytoma	4	3
Mesothelioma (Epitheloid)	1
Mixed apocrine carcinoma	1
Nasal adenocarcinoma	1
Osteosarcoma	1
Osteosarcoma, MCT	1
Peripheral nerve sheath tumor	1
Pilomatricoma	1
SCC	10	2
Simple carcinoma	1
Solid-cystic apocrine adenoma	1
Thichoepithelioma	1
Transitional cell carcinoma	2
ผลรวมทั้งหมด	61

## Sheet: Non-cmt biopsies
No	Year	ID	Lab ID	Animal	Name	Sex	Breed	Age	Location	Classification	Re-classification	Age catagorized	Breed catagorized
1	2012	P5300750	D12-425	canine	Lily	Female	Poodle	2	skin mass	Atypical lipoma with panniculitis	Lipoma/Liposarcoma	≤8years	Purebred
2	2012	P5517904	D12-374	canine	หมี	Male	Mixed	2	Mass at right HL	Osteosarcoma	Osteosarcoma/Osteoma	≤8years	Mixed breed
3	2012	P5518001	D12-393	canine	ดู๋	Male	Poodle	11	Mass at the right mandible	Malignant melanoma	Melanoma/Melanocytoma	>8years	Purebred
4	2012	P5518073	D12-394	canine	Prinzi	Female	Rottweiler	2	Mass in the lateral trunk	Liposarcoma	Lipoma/Liposarcoma	≤8years	Purebred
5	2012	P5416133	D12-340	canine	ซี่	Female	Poodle	8	Mass at ear canal	Squamous cell carcinoma	SCC	≤8years	Purebred
6	2012	P5517531	D12-373	canine	สีหมอก	Female	GR	9	skin mass at inguinal area	Fibrosarcoma	Fibrosarcoma/Fibroma	>8years	Purebred
7	2012	P5517099	D12-306	canine	ดิ้ดดี้	Male	Mixed		Mass at penis	Squamous cell carcinoma	SCC		Mixed breed
8	2012	P5306058	D12-307	canine	ฮานะ	Female	GR	6	Skin mass at metacarpal	Trichoepithelioma	Trichoepithelioma/Trichoblastoma/Tricholemmoma	≤8years	Purebred
9	2012	P5517667	D12-284	canine	ดำดี	Male	Mongrel	11	Skin mass	Fibrosarcoma	Fibrosarcoma/Fibroma	>8years	Purebred
10	2012	P5517491	D12-269	canine	ปุยฝ้าย	Female	Poodle	10	Intestine	Leiomyoma	Leiomyoma	>8years	Purebred
11	2012	P5517521	D12-270	canine	ปังปอนด์	Male	Shitzu	10	Testis	Seminoma	Seminoma	>8years	Purebred
12	2012	P5410311	D12-232	canine	ดุ๊กดิ๊ก	Female	Poodle	5	Mass at vagina	Fibroma	Fibrosarcoma/Fibroma	≤8years	Purebred
13	2012	P5517596	D12-283	canine	กาแฟ	Female	Mixed	7	Skin mass at right lateral trunk	Mast cell tumor grade 2	Mast cell tumor	≤8years	Mixed breed
14	2012	P5517681	D12-285	canine	บุญชู	Male	Basset hound	7	Skin mass at dorsal part of thorax	Infiltrative lipoma	Lipoma/Liposarcoma	≤8years	Purebred
15	2012	P5517099	D12-224	canine	ดิ้ดดี้	Male	Mixed	15	Mass at prepuce	Squamous cell carcinoma	SCC	>8years	Mixed breed
16	2012	P5300580	D12-231	canine	ปลิว	Female	Mixed	8	Skin mass at dorsal part of thorax	Mast cell tumor grade 2	Mast cell tumor	≤8years	Mixed breed
17	2012	P5516609	D12-198	canine	จีจี้	Female	Poodle	10	Mass at tongue	Lingual squamous cell carcinoma	Lingual squamous cell carcinoma	>8years	Purebred
18	2012	P5517052	D12-182	canine	Lucky	Female	GR	5	Mass at right pinna	Trichoblastoma (ribbon type)	Trichoepithelioma/Trichoblastoma/Tricholemmoma	≤8years	Purebred
19	2012	P5517225	D12-197	canine	อ้วน	Male	Mixed	12	Skin mass	Mast cell tumor grade 2	Mast cell tumor	>8years	Mixed breed
20	2012	P5517183	D12-200	canine	หมูหยอง	Male	Poodle	6	Skin mass at base of tail	Cystic trichoepithelioma	Cystic trichoepithelioma	≤8years	Purebred
21	2012	P5517139	D12-196	canine	สม็อก	Male	Mixed		Mass at skin	Mast cell tumor grade 2	Mast cell tumor		Mixed breed
22	2012	P4416788	D12-119	canine	สไปรท์	Male	Mixed	10	Skin mass at right FL	Squamous cell carcinoma	SCC	>8years	Mixed breed
23	2012	P5516438	D12-117	canine	กะปิ๋ว	Male	Miniature		Skin mass at right HL	Mast cell tumor grade 2	Mast cell tumor		Purebred
24	2012	P5516646	D12-100	canine	มุม	Female	Mixed	9	Mass at left FL	Osteosarcoma	Osteosarcoma/Osteoma	>8years	Mixed breed
25	2012	P5516531	D12-101	canine	กาโม่	Male	Mixed	12	Mass at dorsal trunk	Hemangiosarcoma	Hemangioma/Hemangiosarcoma/Hemangiopericytoma	>8years	Mixed breed
26	2012	P5416324	D12-120	canine	โมเม	Female	Mixed	13	Subcutaneous mass at shoulder1	Squamous cell carcinoma with sebaceous gland hyperplasia	SCC	>8years	Mixed breed
27	2012	P5416324	D12-118	canine	โมเม	Female	Mixed	13	Subcutaneous mass at shoulder2	Lipoma	Lipoma/Liposarcoma	>8years	Mixed breed
28	2012	P5516505	D12-155	canine	เต้าหู้	Male	Mixed	10	Mass at digit	Sweat gland adenocarcinoma	Sweat gland adenocarcinoma	>8years	Mixed breed
29	2012	P5411773	D12-154	canine	ลัคกี้	Male	Shitzu	9	Subcutaneous mass at shoulder	Squamous cell carcinoma (well differentiated)	SCC	>8years	Purebred
30	2012	P5304298	D12-048	canine	เท็ดดี้เเบร์	Male	Schnauzer	13	Skin mass at right palmar	Malignant fibrous histiocytoma(Anaplastic sarcoma with giant cells)	Malignant fibrous histiocytoma(Anaplastic sarcoma with giant cells)	>8years	Purebred
31	2012	P5305741	55 B 081	canine	เทอร์โบ	Male	Mixed	11	Lower lip	Malignant melanoma	Melanoma/Melanocytoma	>8years	Mixed breed
32	2012	P5416251	D12-015	canine	เฉินหลง	Male	Mixed	15	Mass at left FL	Mast cell tumor grade 2	Mast cell tumor	>8years	Mixed breed
33	2012	P5411708	D12-885	canine	น้ำตาล	Female	Mixed		Mass at base of ear	Sebaceous carcinoma	Sebaceous carcinoma/adenoma/epithelioma		Mixed breed
34	2012	P5519849	D12-887	canine	Teddy	Female	Poodle	9	Mass at perianal area	Lipoma	Lipoma/Liposarcoma	>8years	Purebred
35	2012	P5519622	D12-777	canine	บราวนี่	Male	Poodle	17	Mass at upper lip	Hepatoid gland carcinoma	Hepatoid gland tumor/carcinoma/adenoma/epithelioma	>8years	Purebred
36	2012	P5519640	D12-811	canine	เเต้ม	Female	Mixed	8	Skin mass at axillary area	Mast cell tumor grade 2	Mast cell tumor	≤8years	Mixed breed
37	2012	P5519601	D12-810	canine	บ๊อบบี้	Male	GR		Mass at urinary bladder	Hemangiosarcoma	Hemangioma/Hemangiosarcoma/Hemangiopericytoma		Purebred
38	2012	P5519622	D12-778	canine	บราวนี่	Male	Poodle	17	Mass at perianal area	Hepatoid gland carcinoma	Hepatoid gland tumor/carcinoma/adenoma/epithelioma	>8years	Purebred
39	2012	P5519461	D12-746	canine	จิ๊กโก๋	Male	Cocker	10	Mass at liver	Liposarcoma	Lipoma/Liposarcoma	>8years	Purebred
40	2012	P5519030	D12-702	canine	จิ๋ว	Female	Poodle	8	Oral mass	Malignant melanoma	Melanoma/Melanocytoma	≤8years	Purebred
41	2012	P519030	D12-701	canine	จิ๋ว	Female	Poodle	8	Skin mass	Fibrosarcoma	Fibrosarcoma/Fibroma	≤8years	Purebred
42	2012	P5414306	D12-700	canine	จัมโบ้	Female	GR	7	Skin mass	Trichoepithelioma (cystic)	Trichoepithelioma/Trichoblastoma/Tricholemmoma	≤8years	Purebred
43	2012	P5414561	D12-717	canine	จิก	Female	Rottweiler	10	Skin mass	Malignant melanoma	Melanoma/Melanocytoma	>8years	Purebred
44	2012	P5519183	D12-695	canine	เจ๋อ	Female	Mixed	8	Skin mass	Squamous cell carcinoma	SCC	≤8years	Mixed breed
45	2012	P5300313	D12-666	canine	ลูกเต๋า	Male	Mixed	15	Mass at ventral part of tail	Perianal gland carcinoma	Perianal gland carcinoma/epithelioma/adenocarcinoma	>8years	Mixed breed
46	2012	P5519163	D12-665	canine	กุ๊กไก่	Male	Miniature	7	Mass at dorsal part of tail	Perianal gland epithelioma	Perianal gland carcinoma/epithelioma/adenocarcinoma	≤8years	Purebred
47	2012	P5517197	D12-639	canine	พริตตี้	Female	Poodle	9	Vaginal mass	Fibroma (Molle)	Fibrosarcoma/Fibroma	>8years	Purebred
48	2012	P5518700	D12-548	canine	หลง	Male	LR	6	Mass at left inguinal	Liposarcoma	Lipoma/Liposarcoma	≤8years	Purebred
49	2012	P5302642	D12-550	canine	เดียร์	Female	Poodle	11	Skin mass	Sebaceous adenoma	Sebaceous carcinoma/adenoma/epithelioma	>8years	Purebred
50	2012	P5516505	D12-532	canine	เต้าหู้	Male	Mixed	10	Mass at lateral part of neck	Sweat gland adenocarcinoma	Sweat gland adenocarcinoma	>8years	Mixed breed
51	2012	P5518555	D12-507	canine	ตัวเล็ก	Female	Shitzu	8	Mass at lower eyelid	Meibomian adenoma	Meibomian adenoma/epithelioma/adenocarcinoma	≤8years	Purebred
52	2012	P5518787	D12-640	canine	Sunny	Female	LR	15	Mass at ear canal and skin	Sebaceous epithelioma	Sebaceous carcinoma/adenoma/epithelioma	>8years	Purebred
53	2012	P5414818	D12-651	canine	ตัวใหม่	Male	Mixed	6	Mass at trunk and abdomen	Mast cell tumor grade 2	Mast cell tumor	≤8years	Mixed breed
54	2012	P5517463	D12-604	canine	ซูโม	Male	Bangkaew	7	Testis	Seminoma	Seminoma	≤8years	Purebred
55	2012	P5518997	D12-611	canine	จูน	Female	Boxer	10	Skin mass	Fibroma	Fibrosarcoma/Fibroma	>8years	Purebred
56	2012	P5518973	D12-603	canine	นินจา	Female	Mixed	7	Skin mass	Lipoma	Lipoma/Liposarcoma	≤8years	Mixed breed
57	2012	P5408867	D12-595	canine	เเคบหมู	Male	Siberian Husky	6	Mass at frontal area of skull	Basal cell tumor	Basal cell tumor/carcinoma	≤8years	Purebred
58	2012	P5518711	D12-549	canine	อะตอม	Female	GR	9	Skin mass	Squamous cell carcinoma	SCC	>8years	Purebred
59	2012	P5518303	D12-540	canine	โฮม	Male	Poodle	10	Mass at right axilla	Liposarcoma was highly suspected	Lipoma/Liposarcoma	>8years	Purebred
60	2012	P5518534	D12-505	canine	ชายกลาง	Male	Mixed	7	Skin mass	Hemangiomas	Hemangioma/Hemangiosarcoma/Hemangiopericytoma	≤8years	Mixed breed
61	2012	P5517408	D12-485	canine	นิลกาฬ	Female	Poodle	12	Skin mass at left abdominal area	Trichobalstic carcinoma	Trichobalstic carcinoma	>8years	Purebred
62	2012	P5518468	D12-483	canine	ครีม	Female	Mixed	9	Mass at foot pad of right HL	Schwannoma	Schwannoma	>8years	Mixed breed
63	2012	P5518195	D12-444	canine	เจนนี่	Female	Mixed	12	Subcutaneous mass at inguinal area	Infiltrative lipoma	Lipoma/Liposarcoma	>8years	Mixed breed
64	2012	P5522602	D12-1616	feline	นุ้ย	Female	DSH	11	Skin mass at right axillary	Fibrosarcoma	Fibroma/Fibrosarcoma	>8years	Mixed breed
65	2012	P5522681	D12-1617	canine	จูเนียร์	Male	Pomeranian	6	Testis	Sertoli cell tumor	Sertoli cell tumor	≤8years	Purebred
66	2012	P5522587	D12-1615	canine	ดอก	Male	Mixed	4	Testis	Sertoli cell tumor	Sertoli cell tumor	≤8years	Mixed breed
67	2012	P5522674	D12-1632	canine	เก็กฮวย		LR		Skin mass	Mast cell tumor grade 2	Mast cell tumor		Purebred
68	2012	P5517861	D12-1595	canine	หมูหยอง	Female	Shitzu		Skin mass	Squamous cell carcinoma	SCC		Purebred
69	2012	P5518195	55 B 2553	canine	เจนนี่		Mixed		Vaginal mass	Fibroma	Fibrosarcoma/Fibroma		Mixed breed
70	2012	P5517531	D12-1581	canine	สีหมอก	Female	GR	9	Mass at perianal area	Schwannoma	Schwannoma		Purebred
71	2012	P5522515	D12-1594	canine	หมูปิ้ง	Female	Poodle		Mass at right baccal area	Malignant melanoma	Melanoma/Melanocytoma		Purebred
72	2012	P5522448	D12-1598	canine	น้องโคล่า	Male	Mixed		Skin mass	Fibrosarcoma	Fibrosarcoma/Fibroma		Mixed breed
73	2012	P5522336	D12-1548	feline	เด็กชายหมี	Male	DSH		Mass at buccal area	Amelanotic melanoma	Melanoma/Melanocytoma		Mixed breed
74	2012	P5522357	D12-1547	canine	ข้าวตอก	Male	Mongrel		Skin mass at neck	Squamous cell carcinoma	SCC		Purebred
75	2012	P5519498	D12-1367	canine	ไข่ป่าม	Female	Mixed	10	Skin mass at left thorax	Mast cell tumor grade 2	Mast cell tumor	>8years	Mixed breed
76	2012	P5521583	D12-1373	canine	ยักษ์	Male	Pit Bull	10	Skin mass at ventral part of thorax	Mast cell tumor grade 2	Mast cell tumor	>8years	Purebred
77	2012	P5303038	D12-1437	canine	เจเจ	Female	Pomeranian	10	Mass at vulva	Schwannoma	Schwannoma	>8years	Purebred
78	2012	P5411525	D12-1368	canine	ส้มฉุน	Male	English cocker	7	Mass at ear pinna	Basosquamous cell carcinoma	Basosquamous cell carcinoma/epithelioma	≤8years	Purebred
79	2012	P5521930	D12-1439	canine	ฟางข้าว	Male	GR	9	Mass at right FL	Osteosarcoma	Osteosarcoma/Osteoma	>8years	Purebred
80	2012	P5522089	D12-1505	canine	น้องกาเเฟ	Female	Mixed	8	Skin mass	Mast cell tumor grade 2	Mast cell tumor	≤8years	Mixed breed
81	2012	P5521930	D12-1440	canine	ฟางข้าว	Male	GR	9	Lymph node	Lymph node metastasis was highly suspected	Lymph node metastasis	>8years	Purebred
82	2012	P5415873	D12-1435	canine	Lily	Male	Mixed	11 months	Skin mass at left thoracic area	Mast cell tumor grade 2	Mast cell tumor	≤8years	Mixed breed
83	2012	P5521070	D12-1475	canine	แมงลัก	Female	Mixed	7	Mass at the right lumbar area	Malignant schwannoma	Malignant schwannoma	≤8years	Mixed breed
84	2012	P5522036	D12-1442	canine	ดอนล่า	Female	Poodle	9	Mass at ventral of abdomen	Osteosarcoma	Osteosarcoma/Osteoma	>8years	Purebred
85	2012	P5520416	D12-1372	canine	โกโก้	Male	Cocker	8	Mass at dorsal wall of anus	Mucinous adrenocarcinoma	Mucinous adrenocarcinoma	≤8years	Purebred
86	2012	P5521555	D12-1369	canine	ก๊อต	Male	Mixed	13	Mass at dorsal part of anus	Hepatoid gland adenoma	Hepatoid gland tumor/carcinoma/adenoma/epithelioma	>8years	Mixed breed
87	2012	P5303103	D12-1268	canine	เเดง	Female	Mixed	13	Skin mass, lymph node	Mast cell tumor grade 2 with lymph node metastasis	Mast cell tumor	>8years	Mixed breed
88	2012	P5521216	D12-1227	canine	โทนี่	Female	Cocker	9	Mass at vulva	Fibroma	Fibrosarcoma/Fibroma	>8years	Purebred
89	2012	P5521106	D12-1202	canine	มูมู่	Female	Poodle	12	Skin mass at vulva	Mast cell tumor grade 2	Mast cell tumor	>8years	Purebred
90	2012	P5521664	D12-1328	canine	ข้าวโพด	Male	Mixed	13	Mass at digit	Fibrosarcoma	Fibrosarcoma/Fibroma	>8years	Mixed breed
91	2012	P5521525	D12-1307	canine	จู๋จี๋	Female	Mongrel	10	Skin mass at trunk	Tubulopapillary carcinoma	Tubulopapillary carcinoma	>8years	Purebred
92	2012	P5521373	D12-1266	canine	ตาล	Male	GR	10	Skin mass at neck	Fibrosarcoma	Fibrosarcoma/Fibroma	>8years	Purebred
93	2012	P5521421	D12-1267	canine	Tong	Female	Mixed	15	Skin mass at abdominal area	Hemangiosarcoma	Hemangioma/Hemangiosarcoma/Hemangiopericytoma	>8years	Mixed breed
94	2012	P5303854	D12-1228	canine	ลักกี้	Female	Shitzu	8	Skin mass at ventral thorax	Mast cell tumor grade 2	Mast cell tumor	≤8years	Purebred
95	2012	P5521043	D12-1200	canine	ตุ๊ต๊ะ	Male	Shitzu	6	Mass at right upper eyelid	Meibomian epithelioma	Meibomian adenoma/epithelioma/adenocarcinoma	≤8years	Purebred
96	2012	P5520159	D12-1155	canine	หมิว	Female	Poodle	9	Mass at gum	Squamous cell carcinoma	SCC	>8years	Purebred
97	2012	P5521062	D12-1163	canine	บางกอก	Male	Bangkaew	7	Skin mass at neck	Plasmacytoma	Plasmacytoma	≤8years	Purebred
98	2012	P5520335	D12-1083	canine	หลง	Female	Mixed	9	Valva mass	Fibroma (durum)	Fibrosarcoma/Fibroma	>8years	Mixed breed
99	2012	P5521498	D12-1291	canine	นำโชค	Male	Chow Chow	12	Mass at the ear	Osteosarcoma	Osteosarcoma/Osteoma	>8years	Purebred
100	2012	P5520375	D12-986	canine	ไดโกโร่	Male	German Shepherd	9	Mass at metacarpal area	Osteosarcoma was suggestion	Osteosarcoma/Osteoma	>8years	Purebred
[truncated: 1,210 more rows]

## Sheet: Privot MGT
Animal	Feline
[truncated: 30 more rows]

[truncated: 6 more sheets: all MGT from SAH, proportion, proportion MGT, Canine tumor biopsies, breed CMT, breed FMT]
